# Supplementary material for: Mining proteomes for zinc finger persulfidation
Source: Royal Society of Chemistry journal article supplement (doi:10.1039/d3cb00106g), 2024-01-01
Supplement: d3cb00106g2.zip [file d3cb00106g2.zip]

## Sheet: Total proteome
Accession	Entry name	Coverage (%)	#Peptides	#Unique	Replicate_1 Log2(intensity)	Replicate_2 Log2(intensity)	Replicate_3 Log2(intensity)	Replicate_4 Log2(intensity)	Avg. Mass	PTM	Description
Q99MD6	TRXR3_MOUSE	6.75	2	2	22.3584	21.1788	22.6062	22.7886	71288	Oxidation (M)	Thioredoxin reductase 3 OS=Mus musculus OX=10090 GN=Txnrd3 PE=1 SV=3
Q9D3W4	GPN3_MOUSE	25.7	4	4	24.9977	25.2133	25.2021	25.2785	32790	Oxidation (M)	GPN-loop GTPase 3 OS=Mus musculus OX=10090 GN=Gpn3 PE=2 SV=1
Q91YE5	BAZ2A_MOUSE	3.86	4	4	23.2508	23.6096	22.7499	23.4923	209618	Oxidation (M)	Bromodomain adjacent to zinc finger domain protein 2A OS=Mus musculus OX=10090 GN=Baz2a PE=1 SV=2
Q3U9G9	LBR_MOUSE	22.2	11	11	29.579	30.7292	29.3951	30.2535	71440	Acetylation (N-term)	Delta(14)-sterol reductase LBR OS=Mus musculus OX=10090 GN=Lbr PE=1 SV=2
O88939	ZBT7A_MOUSE	22.32	6	6	25.4645	26.8264	25.9157	26.8741	60281	Acetylation (N-term);Oxidation (M)	Zinc finger and BTB domain-containing protein 7A OS=Mus musculus OX=10090 GN=Zbtb7a PE=1 SV=2
Q8CGA0	PPM1F_MOUSE	38.27	9	9	26.5285	26.976	26.2317	26.9977	49611		Protein phosphatase 1F OS=Mus musculus OX=10090 GN=Ppm1f PE=1 SV=1
Q8BZR9	NCBP3_MOUSE	19.84	7	7	25.5869	26.0588	25.5463	26.1155	70043	Oxidation (M)	Nuclear cap-binding protein subunit 3 OS=Mus musculus OX=10090 GN=Ncbp3 PE=1 SV=1
Q8C0V9	FRMD6_MOUSE	2.41	1	1	21.398	21.1004	20.011	20.4068	71652		FERM domain-containing protein 6 OS=Mus musculus OX=10090 GN=Frmd6 PE=1 SV=2
Q924Z6	XPO6_MOUSE	8.18	6	6	24.4738	25.5869	24.2961	25.4769	128664		Exportin-6 OS=Mus musculus OX=10090 GN=Xpo6 PE=1 SV=2
Q3TKY6	CWC27_MOUSE	35.61	8	8	26.3376	27.1604	26.2696	26.9316	53543	Acetylation (N-term);NBF;Oxidation (M)	Spliceosome-associated protein CWC27 homolog OS=Mus musculus OX=10090 GN=Cwc27 PE=1 SV=1
P70390	SHOX2_MOUSE	13.6	3	2	24.9316	25.0935	25.3273	24.8288	34905	Acetylation (N-term)	Short stature homeobox protein 2 OS=Mus musculus OX=10090 GN=Shox2 PE=2 SV=1
Q3THW5	H2AV_MOUSE	41.41	5	3	30.3303	30.7292	29.0531	29.8127	13509	Acetylation (N-term)	Histone H2A.V OS=Mus musculus OX=10090 GN=H2az2 PE=1 SV=3
Q6A065	CE170_MOUSE	34.32	35	34	27.8916	28.604	28.0557	28.5862	175050	Acetylation (N-term);Oxidation (M)	Centrosomal protein of 170 kDa OS=Mus musculus OX=10090 GN=Cep170 PE=1 SV=2
Q9CQG3	ZMY19_MOUSE	17.62	2	2	21.9259	22.6379	23.2961	22.3524	26433		Zinc finger MYND domain-containing protein 19 OS=Mus musculus OX=10090 GN=Zmynd19 PE=2 SV=1
Q9CX48	ZCH10_MOUSE	7.3	1	1	23.5165	23.21	23.5638	23.6971	19148		Zinc finger CCHC domain-containing protein 10 OS=Mus musculus OX=10090 GN=Zcchc10 PE=2 SV=1
P58404	STRN4_MOUSE	26.18	11	11	26.4738	26.4645	26.1352	26.2944	81645	Oxidation (M)	Striatin-4 OS=Mus musculus OX=10090 GN=Strn4 PE=1 SV=2
Q8BZH4	POGZ_MOUSE	17.25	15	15	25.9473	26.6865	27.0711	26.6595	154910	Oxidation (M)	Pogo transposable element with ZNF domain OS=Mus musculus OX=10090 GN=Pogz PE=1 SV=2
Q9DCS9	NDUBA_MOUSE	31.82	4	4	28.6663	30.1842	28.2216	28.8711	21024	Oxidation (M)	NADH dehydrogenase [ubiquinone] 1 beta subcomplex subunit 10 OS=Mus musculus OX=10090 GN=Ndufb10 PE=1 SV=3
Q9R1P1	PSB3_MOUSE	30.73	4	4	30.2647	31.3088	30.4823	31.3142	22965	Oxidation (M)	Proteasome subunit beta type-3 OS=Mus musculus OX=10090 GN=Psmb3 PE=1 SV=1
P59326	YTHD1_MOUSE	22.72	8	5	26.9428	25.9977	26.7645	25.726	60879	Oxidation (M)	YTH domain-containing family protein 1 OS=Mus musculus OX=10090 GN=Ythdf1 PE=1 SV=1
Q2YDW7	KMT5A_MOUSE	4.3	1	1	21.8446	21.3463	24.019	21.8529	38845		N-lysine methyltransferase KMT5A OS=Mus musculus OX=10090 GN=Kmt5a PE=1 SV=1
Q9ESJ0	XPO4_MOUSE	22.15	16	16	27.1795	27.8081	26.9088	27.3992	129979	Acetylation (N-term);Oxidation (M)	Exportin-4 OS=Mus musculus OX=10090 GN=Xpo4 PE=1 SV=2
Q62245	SOS1_MOUSE	6.29	5	5	25.4202	24.2679	24.3578	25.5638	150883		Son of sevenless homolog 1 OS=Mus musculus OX=10090 GN=Sos1 PE=1 SV=2
O88878	ZFAN5_MOUSE	22.54	2	2	25.1332	25.7312	25.1449	25.239	23058	Oxidation (M)	AN1-type zinc finger protein 5 OS=Mus musculus OX=10090 GN=Zfand5 PE=1 SV=1
Q9CWI3	BCCIP_MOUSE	25.63	5	5	25.5926	25.8433	26.6865	26.0254	35942	Oxidation (M)	BRCA2 and CDKN1A-interacting protein OS=Mus musculus OX=10090 GN=Bccip PE=1 SV=1
Q9WVH9	FBLN5_MOUSE	3.12	1	1	24.2821	25.6838	24.4105	24.5696	50193	Oxidation (M)	Fibulin-5 OS=Mus musculus OX=10090 GN=Fbln5 PE=1 SV=1
Q9D2R0	AACS_MOUSE	18.15	10	10	28.2714	29.5052	28.3153	29.1337	75200	Oxidation (M)	Acetoacetyl-CoA synthetase OS=Mus musculus OX=10090 GN=Aacs PE=1 SV=1
O70161	PI51C_MOUSE	3.63	2	1	22.3879	20.5263	22.1065	21.5896	72408	Oxidation (M)	Phosphatidylinositol 4-phosphate 5-kinase type-1 gamma OS=Mus musculus OX=10090 GN=Pip5k1c PE=1 SV=2
Q8C6G8	WDR26_MOUSE	6.55	3	3	25.1757	26.0629	25.3844	25.9738	70543		WD repeat-containing protein 26 OS=Mus musculus OX=10090 GN=Wdr26 PE=1 SV=3
Q78PY7	SND1_MOUSE	44.62	30	30	30.947	31.5933	30.8234	31.4284	102088	Acetylation (N-term);NBF;Oxidation (M)	Staphylococcal nuclease domain-containing protein 1 OS=Mus musculus OX=10090 GN=Snd1 PE=1 SV=1
Q62130	PTN14_MOUSE	5.38	5	4	23.4298	24.6649	23.9406	24.5345	135042	Oxidation (M)	Tyrosine-protein phosphatase non-receptor type 14 OS=Mus musculus OX=10090 GN=Ptpn14 PE=1 SV=2
Q9CZA6	NDE1_MOUSE	10.17	3	2	24.3844	25.1719	24.2096	24.7945	38523	Oxidation (M)	Nuclear distribution protein nudE homolog 1 OS=Mus musculus OX=10090 GN=Nde1 PE=1 SV=1
Q6NZR2	MSD2_MOUSE	6.98	2	2	22.3989	23.2535	21.4559	22.3153	61361		Myb/SANT-like DNA-binding domain-containing protein 2 OS=Mus musculus OX=10090 GN=Msantd2 PE=1 SV=1
P60840	ENSA_MOUSE	14.05	1	1	24.217	24.8191	24.3376	24.1253	13335		Alpha-endosulfine OS=Mus musculus OX=10090 GN=Ensa PE=1 SV=1
P47857	PFKAM_MOUSE	24.23	12	11	27.8385	28.0453	27.8564	28.1361	85269	Oxidation (M)	ATP-dependent 6-phosphofructokinase, muscle type OS=Mus musculus OX=10090 GN=Pfkm PE=1 SV=3
Q9CYZ8	SSBP2_MOUSE	4.43	1	1	19.0502	21.4636	19.1646	20.2895	37846	Oxidation (M)	Single-stranded DNA-binding protein 2 OS=Mus musculus OX=10090 GN=Ssbp2 PE=1 SV=1
Q925E7	2ABD_MOUSE	6.18	7	2	22.4939	24.5696	23.6431	23.8858	51957		Serine/threonine-protein phosphatase 2A 55 kDa regulatory subunit B delta isoform OS=Mus musculus OX=10090 GN=Ppp2r2d PE=1 SV=1
Q8R5C5	ACTY_MOUSE	30.32	9	6	28.6424	28.8445	29.3239	28.7162	42281	Acetylation (N-term);Oxidation (M)	Beta-centractin OS=Mus musculus OX=10090 GN=Actr1b PE=1 SV=1
Q63918	CAVN2_MOUSE	54.78	15	15	28.965	28.9174	28.4154	28.8682	46764	Oxidation (M)	Caveolae-associated protein 2 OS=Mus musculus OX=10090 GN=Cavin2 PE=1 SV=3
Q9DBQ7	PACE1_MOUSE	2.86	1	1	19.7606	NaN	19.0577	20.4847	81333		Protein-associating with the carboxyl-terminal domain of ezrin OS=Mus musculus OX=10090 GN=Scyl3 PE=1 SV=3
Q6PGG2	GMIP_MOUSE	11.23	7	7	25.3376	25.0935	24.4614	24.7645	107545	Acetylation (N-term);Oxidation (M)	GEM-interacting protein OS=Mus musculus OX=10090 GN=Gmip PE=1 SV=1
P46467	VPS4B_MOUSE	27.03	10	8	26.5725	26.8974	26.8858	27.0813	49419		Vacuolar protein sorting-associated protein 4B OS=Mus musculus OX=10090 GN=Vps4b PE=1 SV=2
P97798	NEO1_MOUSE	0.87	1	1	20.7418	24.4105	19.9125	24.6486	163160		Neogenin OS=Mus musculus OX=10090 GN=Neo1 PE=1 SV=1
Q6S5C2	GNPTG_MOUSE	10.1	2	2	21.8056	18.35	21.6862	22.2499	34169		N-acetylglucosamine-1-phosphotransferase subunit gamma OS=Mus musculus OX=10090 GN=Gnptg PE=1 SV=1
Q9Z255	UBE2A_MOUSE	17.76	2	2	22.8916	21.6383	24.4298	22.061	17315		Ubiquitin-conjugating enzyme E2 A OS=Mus musculus OX=10090 GN=Ube2a PE=1 SV=1
Q8BFW7	LPP_MOUSE	40.29	14	14	29.6268	29.3196	29.393	29.4938	65891	Oxidation (M)	Lipoma-preferred partner homolog OS=Mus musculus OX=10090 GN=Lpp PE=1 SV=1
P42208	SEPT2_MOUSE	62.6	17	16	30.4727	30.2193	30.2422	30.3303	41526	Acetylation (N-term);NBF;Oxidation (M)	Septin-2 OS=Mus musculus OX=10090 GN=Septin2 PE=1 SV=2
P35761	TTK_MOUSE	17.99	9	9	25.4707	25.7024	25.417	25.341	96211	Acetylation (N-term);Oxidation (M)	Dual specificity protein kinase TTK OS=Mus musculus OX=10090 GN=Ttk PE=1 SV=1
Q8BFY9	TNPO1_MOUSE	23.72	16	13	28.3951	28.217	28.3023	28.249	102357	Acetylation (N-term);Oxidation (M)	Transportin-1 OS=Mus musculus OX=10090 GN=Tnpo1 PE=1 SV=2
P50446	K2C6A_MOUSE	1.99	5	1	27.5014	27.7958	24.6264	24.8811	59335		Keratin, type II cytoskeletal 6A OS=Mus musculus OX=10090 GN=Krt6a PE=1 SV=3
P63242	IF5A1_MOUSE	55.19	8	8	31.611	31.8347	32.5596	33.1828	16832	Acetylation (N-term);NBF;Oxidation (M)	Eukaryotic translation initiation factor 5A-1 OS=Mus musculus OX=10090 GN=Eif5a PE=1 SV=2
Q99PT1	GDIR1_MOUSE	62.75	12	12	33.4209	33.6839	33.0958	33.4702	23407	Acetylation (N-term);NBF;Oxidation (M)	Rho GDP-dissociation inhibitor 1 OS=Mus musculus OX=10090 GN=Arhgdia PE=1 SV=3
Q8CDM8	FHI2A_MOUSE	17.67	7	7	25.5105	26.417	25.4362	26.0212	86017	Oxidation (M)	FHF complex subunit HOOK interacting protein 2A OS=Mus musculus OX=10090 GN=Fhip2a PE=1 SV=2
Q61391	NEP_MOUSE	1.73	1	1	23.2535	22.7579	22.7743	22.2626	85702		Neprilysin OS=Mus musculus OX=10090 GN=Mme PE=1 SV=3
P27612	PLAP_MOUSE	39.17	22	22	29.1795	30.1361	28.6561	29.203	87221	Oxidation (M)	Phospholipase A-2-activating protein OS=Mus musculus OX=10090 GN=Plaa PE=1 SV=4
O35654	DPOD2_MOUSE	29.64	10	10	26.2445	27.1795	26.2317	27.0084	51355	Acetylation (N-term);Oxidation (M)	DNA polymerase delta subunit 2 OS=Mus musculus OX=10090 GN=Pold2 PE=1 SV=2
Q8BIK4	DOCK9_MOUSE	2.14	2	2	23.0386	22.8674	23.3101	23.7286	235312	Oxidation (M)	Dedicator of cytokinesis protein 9 OS=Mus musculus OX=10090 GN=Dock9 PE=1 SV=2
Q99LG2	TNPO2_MOUSE	9.47	7	4	24.3844	24.3712	26.1965	24.5869	100456		Transportin-2 OS=Mus musculus OX=10090 GN=Tnpo2 PE=1 SV=1
O35459	ECH1_MOUSE	15.29	3	3	24.1015	25.4394	24.7796	24.918	36118	Oxidation (M)	Delta(3,5)-Delta(2,4)-dienoyl-CoA isomerase, mitochondrial OS=Mus musculus OX=10090 GN=Ech1 PE=1 SV=1
Q9CY34	UB2FA_MOUSE	15.68	3	3	22.2922	22.4791	22.8559	22.281	21110		NEDD8-conjugating enzyme UBE2F OS=Mus musculus OX=10090 GN=Ube2f PE=1 SV=1
Q8BFU2	H2A3_MOUSE	28.46	9	3	27.4551	29.6407	26.8264	28.9512	14121	NBF	Histone H2A type 3 OS=Mus musculus OX=10090 GN=H2aw PE=1 SV=3
Q9R001	ATS5_MOUSE	3.87	2	2	19.8141	21.6562	22.1316	22.5305	101844		A disintegrin and metalloproteinase with thrombospondin motifs 5 OS=Mus musculus OX=10090 GN=Adamts5 PE=2 SV=2
Q9JHS4	CLPX_MOUSE	34.38	15	15	27.4862	27.7325	27.17	27.673	69229	Oxidation (M)	ATP-dependent Clp protease ATP-binding subunit clpX-like, mitochondrial OS=Mus musculus OX=10090 GN=Clpx PE=1 SV=2
Q91XL3	UXS1_MOUSE	23.81	5	5	24.6649	25.3376	25.0443	25.3545	47553	Oxidation (M)	UDP-glucuronic acid decarboxylase 1 OS=Mus musculus OX=10090 GN=Uxs1 PE=1 SV=1
Q9QZS2	RNF4_MOUSE	6.19	1	1	21.9158	21.8631	21.2824	22.5119	21910		E3 ubiquitin-protein ligase RNF4 OS=Mus musculus OX=10090 GN=Rnf4 PE=1 SV=1
Q80UZ2	SDA1_MOUSE	13.54	7	7	26.5255	26.574	26.3992	26.3444	79559	Oxidation (M)	Protein SDA1 homolog OS=Mus musculus OX=10090 GN=Sdad1 PE=1 SV=1
Q6ZQ93	UBP34_MOUSE	4.16	10	10	24.8623	25.0526	24.7441	25.2058	408214	Oxidation (M)	Ubiquitin carboxyl-terminal hydrolase 34 OS=Mus musculus OX=10090 GN=Usp34 PE=1 SV=3
O55131	SEPT7_MOUSE	34.63	14	13	30.6022	30.6544	30.2869	30.393	50550	Acetylation (N-term);Oxidation (M)	Septin-7 OS=Mus musculus OX=10090 GN=Septin7 PE=1 SV=1
Q3URQ7	MTHSD_MOUSE	12.63	3	3	24.7543	25.6125	24.6971	25.3811	40789		Methenyltetrahydrofolate synthase domain-containing protein OS=Mus musculus OX=10090 GN=Mthfsd PE=2 SV=1
Q8BQR4	KANL2_MOUSE	3.09	1	1	21.0437	22.0397	20.7402	21.7169	54173	Oxidation (M)	KAT8 regulatory NSL complex subunit 2 OS=Mus musculus OX=10090 GN=Kansl2 PE=1 SV=1
Q924L1	LTMD1_MOUSE	8.06	2	2	23.1383	19.1226	21.5473	22.6626	41701	Oxidation (M)	LETM1 domain-containing protein 1 OS=Mus musculus OX=10090 GN=Letmd1 PE=1 SV=1
Q9EQJ9	MAGI3_MOUSE	2.1	2	2	23.0419	23.5045	23.3376	23.1853	161672		Membrane-associated guanylate kinase, WW and PDZ domain-containing protein 3 OS=Mus musculus OX=10090 GN=Magi3 PE=1 SV=2
Q8R1M0	HMCES_MOUSE	9.35	2	2	22.4905	23.391	23.976	23.6865	40169		Abasic site processing protein HMCES OS=Mus musculus OX=10090 GN=Hmces PE=1 SV=1
Q6PGB6	NAA50_MOUSE	26.63	5	5	29.1984	29.0401	28.6998	28.8294	19414		N-alpha-acetyltransferase 50 OS=Mus musculus OX=10090 GN=Naa50 PE=1 SV=1
Q6P6I6	GRL1A_MOUSE	7.1	2	2	23.2167	25.0443	23.6865	24.7945	41237		DNA-directed RNA polymerase II subunit GRINL1A OS=Mus musculus OX=10090 GN=Polr2m PE=2 SV=2
Q9WVF7	DPOE1_MOUSE	9.99	16	16	25.9293	27.5969	26.1681	26.7895	262100	Oxidation (M)	DNA polymerase epsilon catalytic subunit A OS=Mus musculus OX=10090 GN=Pole PE=1 SV=3
O35704	SPTC1_MOUSE	16.49	4	4	26.4738	26.4676	25.3778	26.0752	52535		Serine palmitoyltransferase 1 OS=Mus musculus OX=10090 GN=Sptlc1 PE=1 SV=2
Q9DA37	SAMD8_MOUSE	7.32	2	2	23.1622	23.7077	22.555	22.9818	54713	Oxidation (M)	Sphingomyelin synthase-related protein 1 OS=Mus musculus OX=10090 GN=Samd8 PE=2 SV=1
Q60862	ORC2_MOUSE	5.38	2	2	24.9361	23.7995	24.7945	24.8191	65893		Origin recognition complex subunit 2 OS=Mus musculus OX=10090 GN=Orc2 PE=1 SV=1
Q8BY89	CTL2_MOUSE	4.96	2	2	24.9628	26.4154	25.4862	26.228	80110	Oxidation (M)	Choline transporter-like protein 2 OS=Mus musculus OX=10090 GN=Slc44a2 PE=1 SV=2
Q9CZI9	AEN_MOUSE	5.06	1	1	23.417	24.0359	23.9043	23.848	37309		Apoptosis-enhancing nuclease OS=Mus musculus OX=10090 GN=Aen PE=2 SV=1
Q64523	H2A2C_MOUSE	27.91	9	2	25.4298	26.4409	25.3307	27.5165	13988	NBF	Histone H2A type 2-C OS=Mus musculus OX=10090 GN=H2ac20 PE=1 SV=3
Q8BGT6	MILK1_MOUSE	3.68	2	2	22.6365	21.3212	21.4694	21.7362	94079		MICAL-like protein 1 OS=Mus musculus OX=10090 GN=Micall1 PE=1 SV=3
Q9CQ20	M1IP1_MOUSE	20.88	2	2	22.9975	23.3239	22.8948	23.2147	20356	Oxidation (M)	Mid1-interacting protein 1 OS=Mus musculus OX=10090 GN=Mid1ip1 PE=1 SV=1
P06151	LDHA_MOUSE	55.12	22	21	33.0266	32.7751	32.2279	32.3088	36499	Acetylation (N-term);NBF;Oxidation (M)	L-lactate dehydrogenase A chain OS=Mus musculus OX=10090 GN=Ldha PE=1 SV=3
Q00262	STX2_MOUSE	9.69	2	2	22.4733	22.3045	21.7876	22.1788	33178		Syntaxin-2 OS=Mus musculus OX=10090 GN=Stx2 PE=1 SV=1
Q8C6M1	UBP20_MOUSE	1.53	1	1	22.1401	21.5949	23.5404	23.0845	102140	Oxidation (M)	Ubiquitin carboxyl-terminal hydrolase 20 OS=Mus musculus OX=10090 GN=Usp20 PE=1 SV=1
Q7TMV3	FAKD5_MOUSE	5.91	2	2	25.141	27.0296	24.918	26.0955	86600	Oxidation (M)	FAST kinase domain-containing protein 5, mitochondrial OS=Mus musculus OX=10090 GN=Fastkd5 PE=2 SV=1
Q7TPM1	PRC2B_MOUSE	20.79	19	17	26.8019	28.0349	26.2679	27.3992	160913	Acetylation (N-term);Oxidation (M)	Protein PRRC2B OS=Mus musculus OX=10090 GN=Prrc2b PE=1 SV=1
P23591	FCL_MOUSE	33.33	6	6	27.7708	28.1015	27.4551	28.1115	35878	Oxidation (M)	GDP-L-fucose synthase OS=Mus musculus OX=10090 GN=Gfus PE=1 SV=3
Q8BMJ2	SYLC_MOUSE	34.04	30	30	30.5389	31.0479	30.341	30.9746	134192	Acetylation (N-term);Oxidation (M)	Leucine--tRNA ligase, cytoplasmic OS=Mus musculus OX=10090 GN=Lars1 PE=1 SV=2
Q9EQG9	CERT_MOUSE	16.99	8	8	25.6513	25.9694	24.8811	25.5255	71111	Oxidation (M)	Ceramide transfer protein OS=Mus musculus OX=10090 GN=Cert1 PE=1 SV=1
Q61081	CDC37_MOUSE	19.79	5	5	31.0864	31.4083	30.8901	31.1239	44593	Oxidation (M)	Hsp90 co-chaperone Cdc37 OS=Mus musculus OX=10090 GN=Cdc37 PE=1 SV=1
P12265	BGLR_MOUSE	16.36	7	7	27.6458	28.0296	27.5969	27.8385	74195	Acetylation (N-term);Oxidation (M)	Beta-glucuronidase OS=Mus musculus OX=10090 GN=Gusb PE=1 SV=2
Q9ESG9	PMYT1_MOUSE	2.86	1	1	22.207	22.5386	20.766	22.1164	54053		Membrane-associated tyrosine- and threonine-specific cdc2-inhibitory kinase OS=Mus musculus OX=10090 GN=Pkmyt1 PE=2 SV=3
Q9R0G6	COMP_MOUSE	1.85	1	1	21.1941	22.0861	22.2519	20.5603	82342		Cartilage oligomeric matrix protein OS=Mus musculus OX=10090 GN=Comp PE=1 SV=2
Q6NZB1	ANM6_MOUSE	20.63	4	4	24.8044	25.4425	24.7543	25.4738	41866	NBF;Oxidation (M)	Protein arginine N-methyltransferase 6 OS=Mus musculus OX=10090 GN=Prmt6 PE=1 SV=2
Q8CGI1	F193A_MOUSE	1.95	2	2	22.7382	22.9733	20.4384	22.2507	136714	Oxidation (M)	Protein FAM193A OS=Mus musculus OX=10090 GN=Fam193a PE=1 SV=2
P51175	PPOX_MOUSE	21.17	6	6	24.6703	25.391	24.8142	25.1371	50871	Oxidation (M)	Protoporphyrinogen oxidase OS=Mus musculus OX=10090 GN=Ppox PE=1 SV=1
Q99M15	PPIP2_MOUSE	5.69	1	1	21.7579	22.4116	22.5655	22.6965	38948		Proline-serine-threonine phosphatase-interacting protein 2 OS=Mus musculus OX=10090 GN=Pstpip2 PE=1 SV=4
P58334	KLF16_MOUSE	34.66	3	3	24.945	25.6703	24.6649	25.6181	25652		Krueppel-like factor 16 OS=Mus musculus OX=10090 GN=Klf16 PE=1 SV=2
P10404	ENV1_MOUSE	7.02	3	3	28.6458	29.0531	28.7927	29.2847	69613		MLV-related proviral Env polyprotein OS=Mus musculus OX=10090 PE=1 SV=3
Q9CYH6	RRS1_MOUSE	26.03	8	8	26.8858	25.9847	27.1115	25.4645	41552	Oxidation (M)	Ribosome biogenesis regulatory protein homolog OS=Mus musculus OX=10090 GN=Rrs1 PE=1 SV=1
Q05BC3	EMAL1_MOUSE	6.27	3	3	24.4105	24.5869	24.6486	24.558	89680		Echinoderm microtubule-associated protein-like 1 OS=Mus musculus OX=10090 GN=Eml1 PE=1 SV=1
Q9QUM9	PSA6_MOUSE	29.27	7	7	30.2422	30.099	29.8785	30.0217	27372		Proteasome subunit alpha type-6 OS=Mus musculus OX=10090 GN=Psma6 PE=1 SV=1
Q9D7R2	PMEPA_MOUSE	8.46	2	2	22.0233	23.066	20.9907	22.1228	28716		Protein TMEPAI OS=Mus musculus OX=10090 GN=Pmepa1 PE=1 SV=1
Q6PCP5	MFF_MOUSE	31.62	5	5	26.4815	25.6513	26.2856	25.4105	32931	Oxidation (M)	Mitochondrial fission factor OS=Mus musculus OX=10090 GN=Mff PE=1 SV=1
Q8BM85	TBCK_MOUSE	2.1	1	1	19.9345	NaN	19.6748	18.513	86371		TBC domain-containing protein kinase-like protein OS=Mus musculus OX=10090 GN=Tbck PE=1 SV=1
Q6J9G1	STYK1_MOUSE	8.86	2	2	22.1763	22.4616	23.0333	22.8455	48121		Tyrosine-protein kinase STYK1 OS=Mus musculus OX=10090 GN=Styk1 PE=2 SV=2
P63024	VAMP3_MOUSE	31.07	3	2	28.9088	29.5826	28.4113	29.5203	11480	Acetylation (N-term);Oxidation (M)	Vesicle-associated membrane protein 3 OS=Mus musculus OX=10090 GN=Vamp3 PE=1 SV=1
Q9JHJ0	TMOD3_MOUSE	44.32	13	13	28.8445	29.0057	29.0531	28.6663	39503	Oxidation (M)	Tropomodulin-3 OS=Mus musculus OX=10090 GN=Tmod3 PE=1 SV=1
Q9Z1M8	RED_MOUSE	31.6	13	13	27.7958	27.4394	27.1795	27.6663	65616	Oxidation (M)	Protein Red OS=Mus musculus OX=10090 GN=Ik PE=1 SV=2
Q6R891	NEB2_MOUSE	19.71	10	10	26.1757	26.4676	25.4831	26.0894	89520	Oxidation (M)	Neurabin-2 OS=Mus musculus OX=10090 GN=Ppp1r9b PE=1 SV=1
Q9D1G2	PMVK_MOUSE	22.4	3	3	24.632	25.3645	25.8167	25.141	21916		Phosphomevalonate kinase OS=Mus musculus OX=10090 GN=Pmvk PE=1 SV=3
P05977	MYL1_MOUSE	10.64	1	1	19.3411	23.196	21.7852	22.7816	20595	Acetylation (N-term)	Myosin light chain 1/3, skeletal muscle isoform OS=Mus musculus OX=10090 GN=Myl1 PE=1 SV=2
O89017	LGMN_MOUSE	15.4	3	3	27.9203	28.1115	27.9146	27.9146	49373	Oxidation (M)	Legumain OS=Mus musculus OX=10090 GN=Lgmn PE=1 SV=1
P70318	TIAR_MOUSE	13.27	4	3	27.019	26.7389	27.5389	26.673	43389	Oxidation (M)	Nucleolysin TIAR OS=Mus musculus OX=10090 GN=Tial1 PE=1 SV=1
Q80YR7	CLSPN_MOUSE	5.7	4	4	24.1795	23.7389	24.0275	23.391	146715		Claspin OS=Mus musculus OX=10090 GN=Clspn PE=1 SV=2
Q9JJA9	GRASP_MOUSE	18.88	3	3	23.9043	24.3031	24.4041	23.7389	42337	Acetylation (N-term);NBF	General receptor for phosphoinositides 1-associated scaffold protein OS=Mus musculus OX=10090 GN=Tamalin PE=1 SV=2
Q8BMG1	ATRIP_MOUSE	1.91	1	1	21.4652	21.9592	21.9799	22.5949	85548		ATR-interacting protein OS=Mus musculus OX=10090 GN=Atrip PE=1 SV=2
Q8BVU0	LRCH3_MOUSE	17.61	8	8	25.895	27.2803	26.7895	26.3324	86341	Oxidation (M)	DISP complex protein LRCH3 OS=Mus musculus OX=10090 GN=Lrch3 PE=1 SV=3
Q4G5Y1	KLDC2_MOUSE	6.9	2	2	21.0546	17.2503	23.0173	20.4433	45909		Kelch domain-containing protein 2 OS=Mus musculus OX=10090 GN=Klhdc2 PE=2 SV=3
Q3UQ28	PXDN_MOUSE	19.59	20	20	28.0453	28.7517	27.8974	28.0557	165103	Oxidation (M)	Peroxidasin homolog OS=Mus musculus OX=10090 GN=Pxdn PE=1 SV=2
Q8N9S3	AHSA2_MOUSE	10.27	2	2	25.5754	25.1908	25.452	25.2243	37648		Activator of 90 kDa heat shock protein ATPase homolog 2 OS=Mus musculus OX=10090 GN=Ahsa2 PE=1 SV=2
Q8R191	SNG3_MOUSE	11.79	2	2	24.2243	25.4923	24.3578	25.2785	24561		Synaptogyrin-3 OS=Mus musculus OX=10090 GN=Syngr3 PE=1 SV=1
Q8VDG3	PARN_MOUSE	4.81	2	2	26.7771	26.0169	26.8623	25.9043	71559	Oxidation (M)	Poly(A)-specific ribonuclease PARN OS=Mus musculus OX=10090 GN=Parn PE=1 SV=1
Q9JJ00	PLS1_MOUSE	9.15	2	2	25.3645	24.1253	25.4073	25.0359	35914		Phospholipid scramblase 1 OS=Mus musculus OX=10090 GN=Plscr1 PE=1 SV=1
Q80TQ2	CYLD_MOUSE	8.19	5	5	23.7796	25.7517	24.1642	25.9933	106586	Oxidation (M)	Ubiquitin carboxyl-terminal hydrolase CYLD OS=Mus musculus OX=10090 GN=Cyld PE=1 SV=2
Q91XC9	PEX16_MOUSE	14.88	3	3	23.9495	22.7842	23.066	23.4425	38677		Peroxisomal membrane protein PEX16 OS=Mus musculus OX=10090 GN=Pex16 PE=1 SV=2
Q9CY73	RM44_MOUSE	16.82	4	4	26.518	26.7517	26.2225	26.726	37527		39S ribosomal protein L44, mitochondrial OS=Mus musculus OX=10090 GN=Mrpl44 PE=1 SV=3
Q6ZQ58	LARP1_MOUSE	37.97	27	27	29.141	29.3174	28.9732	29.1771	121125	Acetylation (N-term);NBF;Oxidation (M)	La-related protein 1 OS=Mus musculus OX=10090 GN=Larp1 PE=1 SV=3
D3YXK1	SAMD1_MOUSE	12.72	2	2	21.8044	22.5328	23.2437	22.8838	54533	Acetylation (N-term)	Atherin OS=Mus musculus OX=10090 GN=Samd1 PE=1 SV=1
Q8CES0	NAA30_MOUSE	30.22	7	7	26.7517	26.4138	27.0711	26.8142	39433	Acetylation (N-term);Oxidation (M)	N-alpha-acetyltransferase 30 OS=Mus musculus OX=10090 GN=Naa30 PE=1 SV=2
P59235	NUP43_MOUSE	28.68	6	6	28.2399	28.7162	27.9484	28.4473	41990	Oxidation (M)	Nucleoporin Nup43 OS=Mus musculus OX=10090 GN=Nup43 PE=1 SV=2
Q61602	GLI3_MOUSE	5.62	5	5	23.1008	23.7286	23.0212	22.9376	171655	Oxidation (M)	Transcriptional activator GLI3 OS=Mus musculus OX=10090 GN=Gli3 PE=1 SV=2
Q6PD19	ARMD3_MOUSE	5.08	3	3	24.141	23.8191	23.1278	23.7695	78632	Oxidation (M)	Armadillo-like helical domain-containing protein 3 OS=Mus musculus OX=10090 GN=Armh3 PE=1 SV=2
Q8CGP6	H2A1H_MOUSE	28.91	9	3	27.4551	29.6407	26.8264	28.9512	13950	NBF	Histone H2A type 1-H OS=Mus musculus OX=10090 GN=H2ac12 PE=1 SV=3
O70274	TP4A2_MOUSE	8.98	2	1	24.4041	24.3307	24.2821	23.654	19127	Acetylation (N-term);Oxidation (M)	Protein tyrosine phosphatase type IVA 2 OS=Mus musculus OX=10090 GN=Ptp4a2 PE=1 SV=1
P70698	PYRG1_MOUSE	29.95	17	15	30.4919	30.8755	30.5014	30.9814	66682	NBF;Oxidation (M)	CTP synthase 1 OS=Mus musculus OX=10090 GN=Ctps1 PE=1 SV=2
P50431	GLYC_MOUSE	28.66	12	11	28.249	28.8504	28.0349	28.6798	52601	NBF;Oxidation (M)	Serine hydroxymethyltransferase, cytosolic OS=Mus musculus OX=10090 GN=Shmt1 PE=1 SV=3
P47955	RLA1_MOUSE	28.95	2	2	24.6375	24.6703	27.7517	24.5165	11475	Oxidation (M)	60S acidic ribosomal protein P1 OS=Mus musculus OX=10090 GN=Rplp1 PE=1 SV=1
Q9Z2C4	MTMR1_MOUSE	7.03	4	3	21.3227	23.4041	23.4676	23.9134	75313		Myotubularin-related protein 1 OS=Mus musculus OX=10090 GN=Mtmr1 PE=1 SV=1
Q6P1G0	HEAT6_MOUSE	5.41	5	5	24.7995	25.3204	23.9316	24.8717	128922		HEAT repeat-containing protein 6 OS=Mus musculus OX=10090 GN=Heatr6 PE=1 SV=1
Q9ERK4	XPO2_MOUSE	43.87	32	32	32.1052	32.1694	31.8119	33.1975	110455	Acetylation (N-term);Oxidation (M)	Exportin-2 OS=Mus musculus OX=10090 GN=Cse1l PE=1 SV=1
P45591	COF2_MOUSE	46.39	8	5	28.7581	31.5664	31.2479	28.6527	18710	Acetylation (N-term)	Cofilin-2 OS=Mus musculus OX=10090 GN=Cfl2 PE=1 SV=1
O35841	API5_MOUSE	27.18	10	10	29.3869	30.341	29.7723	29.7113	56785	Oxidation (M)	Apoptosis inhibitor 5 OS=Mus musculus OX=10090 GN=Api5 PE=1 SV=2
A2A5E6	Z385C_MOUSE	4.9	1	1	NaN	23.3239	23.867	23.1773	44644	Acetylation (N-term)	Zinc finger protein 385C OS=Mus musculus OX=10090 GN=Znf385c PE=2 SV=1
P41216	ACSL1_MOUSE	4.29	3	2	22.3139	23.8385	23.4923	23.7796	77951	Oxidation (M)	Long-chain-fatty-acid--CoA ligase 1 OS=Mus musculus OX=10090 GN=Acsl1 PE=1 SV=2
Q61136	PRP4B_MOUSE	10.23	7	7	26.8974	26.8623	26.3511	25.9584	116976	Oxidation (M)	Serine/threonine-protein kinase PRP4 homolog OS=Mus musculus OX=10090 GN=Prpf4b PE=1 SV=3
Q6GQV7	EDRF1_MOUSE	1.29	1	1	18.8593	19.9722	17.2477	20.004	138834		Erythroid differentiation-related factor 1 OS=Mus musculus OX=10090 GN=Edrf1 PE=1 SV=1
Q91WQ5	TAF5L_MOUSE	15.62	4	4	24.2096	24.6811	24.4676	24.4425	65911	Oxidation (M)	TAF5-like RNA polymerase II p300/CBP-associated factor-associated factor 65 kDa subunit 5L OS=Mus musculus OX=10090 GN=Taf5l PE=2 SV=1
Q8K2B3	SDHA_MOUSE	40.66	20	20	30.0864	30.4234	30.1239	30.1239	72585	NBF;Oxidation (M)	Succinate dehydrogenase [ubiquinone] flavoprotein subunit, mitochondrial OS=Mus musculus OX=10090 GN=Sdha PE=1 SV=1
Q8R2Q4	RRF2M_MOUSE	7.06	3	3	23.7182	24.0526	23.6971	23.5165	86109	Oxidation (M)	Ribosome-releasing factor 2, mitochondrial OS=Mus musculus OX=10090 GN=Gfm2 PE=1 SV=2
Q3KNM2	MARH5_MOUSE	14.75	3	3	25.7466	26.2372	25.3273	26.2481	31232	Oxidation (M)	E3 ubiquitin-protein ligase MARCHF5 OS=Mus musculus OX=10090 GN=Marchf5 PE=1 SV=1
Q921R8	S41A3_MOUSE	2.66	1	1	18.4109	19.9684	17.3093	18.5454	53257		Solute carrier family 41 member 3 OS=Mus musculus OX=10090 GN=Slc41a3 PE=1 SV=1
Q921M4	GOGA2_MOUSE	16.12	9	9	26.7517	28.1115	26.3877	27.8504	113278	Oxidation (M)	Golgin subfamily A member 2 OS=Mus musculus OX=10090 GN=Golga2 PE=1 SV=3
Q9D898	ARP5L_MOUSE	28.76	3	3	27.17	26.9088	26.8623	26.8741	16980		Actin-related protein 2/3 complex subunit 5-like protein OS=Mus musculus OX=10090 GN=Arpc5l PE=1 SV=1
Q8C3X8	LMF2_MOUSE	10.26	5	5	27.0084	27.965	27.3494	28.0137	79997	Oxidation (M)	Lipase maturation factor 2 OS=Mus musculus OX=10090 GN=Lmf2 PE=1 SV=1
Q6VNB8	WDFY3_MOUSE	4.7	10	10	24.002	23.1245	23.7695	23.5522	392338		WD repeat and FYVE domain-containing protein 3 OS=Mus musculus OX=10090 GN=Wdfy3 PE=1 SV=1
Q8R3G1	PP1R8_MOUSE	32.48	8	8	28.579	28.3196	27.9814	28.5463	38528	Oxidation (M)	Nuclear inhibitor of protein phosphatase 1 OS=Mus musculus OX=10090 GN=Ppp1r8 PE=1 SV=1
Q6P8X1	SNX6_MOUSE	19.95	8	8	28.5315	28.1507	27.8385	27.7389	46649	Acetylation (N-term);Oxidation (M)	Sorting nexin-6 OS=Mus musculus OX=10090 GN=Snx6 PE=1 SV=2
O70494	SP3_MOUSE	2.04	1	1	23.4425	21.945	22.8544	22.2338	82362		Transcription factor Sp3 OS=Mus musculus OX=10090 GN=Sp3 PE=1 SV=2
Q9CQ22	LTOR1_MOUSE	57.14	5	5	26.6865	26.673	27.0401	26.9316	17749	Oxidation (M)	Ragulator complex protein LAMTOR1 OS=Mus musculus OX=10090 GN=Lamtor1 PE=1 SV=1
P60122	RUVB1_MOUSE	42.11	15	15	30.3724	30.4433	30.4134	30.1724	50214	Oxidation (M)	RuvB-like 1 OS=Mus musculus OX=10090 GN=Ruvbl1 PE=1 SV=1
Q3THJ3	EIF1A_MOUSE	17.65	2	2	25.3778	25.8504	24.7645	25.7594	19520		Probable RNA-binding protein EIF1AD OS=Mus musculus OX=10090 GN=Eif1ad PE=1 SV=2
Q9WUH1	TM115_MOUSE	17.14	4	4	26.4877	26.965	26.5014	26.8974	38099	Oxidation (M)	Transmembrane protein 115 OS=Mus musculus OX=10090 GN=Tmem115 PE=1 SV=1
Q8CHU3	EPN2_MOUSE	11.26	4	4	25.2058	25.5374	25.239	25.3031	63472	Oxidation (M)	Epsin-2 OS=Mus musculus OX=10090 GN=Epn2 PE=1 SV=1
P53612	PGTB2_MOUSE	22.42	6	6	26.4457	26.8264	26.2021	26.7517	37803	Oxidation (M)	Geranylgeranyl transferase type-2 subunit beta OS=Mus musculus OX=10090 GN=Rabggtb PE=1 SV=2
Q91VX9	TM168_MOUSE	2.44	1	1	27.0505	27.8142	23.1728	28.0296	79674		Transmembrane protein 168 OS=Mus musculus OX=10090 GN=Tmem168 PE=1 SV=1
Q922D4	PP6R3_MOUSE	23.34	15	14	27.7325	27.8203	27.5389	27.6663	94653	Oxidation (M)	Serine/threonine-protein phosphatase 6 regulatory subunit 3 OS=Mus musculus OX=10090 GN=Ppp6r3 PE=1 SV=1
Q8K358	PIGU_MOUSE	8.76	3	3	24.6209	26.4769	25.8069	26.5448	49804		Phosphatidylinositol glycan anchor biosynthesis class U protein OS=Mus musculus OX=10090 GN=Pigu PE=1 SV=4
Q80YV4	PANK4_MOUSE	6.83	3	3	20.5225	22.4118	22.187	22.3572	91522	Oxidation (M)	4'-phosphopantetheine phosphatase OS=Mus musculus OX=10090 GN=Pank4 PE=1 SV=2
Q8R5A6	TB22A_MOUSE	6.78	2	2	24.1871	23.8385	24.2821	23.6431	59362		TBC1 domain family member 22A OS=Mus musculus OX=10090 GN=Tbc1d22a PE=1 SV=3
Q9JJI6	PIGO_MOUSE	1.1	1	1	20.9254	21.7538	20.8997	22.0984	119156		GPI ethanolamine phosphate transferase 3 OS=Mus musculus OX=10090 GN=Pigo PE=1 SV=2
O70480	VAMP4_MOUSE	31.91	3	3	25.0935	25.726	25.3778	25.2643	16353	Oxidation (M)	Vesicle-associated membrane protein 4 OS=Mus musculus OX=10090 GN=Vamp4 PE=1 SV=1
Q3UW53	NIBA1_MOUSE	7.45	4	4	24.002	23.5285	24.4041	24.5754	102649		Protein Niban 1 OS=Mus musculus OX=10090 GN=Niban1 PE=1 SV=2
P31938	MP2K1_MOUSE	25.95	12	8	28.3066	26.8019	26.5389	26.6865	43474	Oxidation (M)	Dual specificity mitogen-activated protein kinase kinase 1 OS=Mus musculus OX=10090 GN=Map2k1 PE=1 SV=2
Q9QY33	TSN3_MOUSE	6.32	2	2	23.5638	24.3031	23.5404	24.1015	28049		Tetraspanin-3 OS=Mus musculus OX=10090 GN=Tspan3 PE=1 SV=1
Q80ZK0	RT10_MOUSE	27.5	3	3	25.7466	25.1757	25.7568	25.1908	18698		28S ribosomal protein S10, mitochondrial OS=Mus musculus OX=10090 GN=Mrps10 PE=1 SV=1
Q58A65	JIP4_MOUSE	24.6	20	20	27.1604	28.5573	26.4846	28.0557	146219	Acetylation (N-term);Oxidation (M)	C-Jun-amino-terminal kinase-interacting protein 4 OS=Mus musculus OX=10090 GN=Spag9 PE=1 SV=2
Q9CPV5	PMF1_MOUSE	30.2	4	4	25.604	26.5898	25.7155	26.3612	23121		Polyamine-modulated factor 1 OS=Mus musculus OX=10090 GN=Pmf1 PE=1 SV=1
P54763	EPHB2_MOUSE	11.87	8	7	24.8576	25.6348	25.0233	25.1449	109899	Oxidation (M)	Ephrin type-B receptor 2 OS=Mus musculus OX=10090 GN=Ephb2 PE=1 SV=3
B2RY04	DOCK5_MOUSE	14.83	19	18	25.002	25.7077	25.0062	25.5696	214429	Oxidation (M)	Dedicator of cytokinesis protein 5 OS=Mus musculus OX=10090 GN=Dock5 PE=1 SV=2
Q8R5F3	OARD1_MOUSE	7.89	1	1	23.8858	24.0359	23.4041	24.4041	17107		ADP-ribose glycohydrolase OARD1 OS=Mus musculus OX=10090 GN=Oard1 PE=1 SV=2
P97792	CXAR_MOUSE	6.58	2	2	23.0642	23.1542	22.9564	22.6884	39948		Coxsackievirus and adenovirus receptor homolog OS=Mus musculus OX=10090 GN=Cxadr PE=1 SV=1
Q9DBU6	RSRC1_MOUSE	8.98	2	2	22.9181	22.4044	22.98	22.4189	38637		Serine/Arginine-related protein 53 OS=Mus musculus OX=10090 GN=Rsrc1 PE=1 SV=1
B1ARD6	SLFN9_MOUSE	18.57	13	13	26.3324	27.673	25.9043	26.8974	103992	Acetylation (N-term);Oxidation (M)	Schlafen family member 9 OS=Mus musculus OX=10090 GN=Slfn9 PE=2 SV=1
Q6KAU4	MB12B_MOUSE	14.83	2	2	23.1832	23.0323	23.2961	23.2105	35411		Multivesicular body subunit 12B OS=Mus musculus OX=10090 GN=Mvb12b PE=1 SV=2
Q8C092	TAF5_MOUSE	11.49	5	5	24.1488	24.7024	23.3239	23.9495	87045	Acetylation (N-term);Oxidation (M)	Transcription initiation factor TFIID subunit 5 OS=Mus musculus OX=10090 GN=Taf5 PE=1 SV=1
P27546	MAP4_MOUSE	45.24	34	34	30.7613	29.4938	30.7849	29.3848	117429	Acetylation (N-term);NBF;Oxidation (M)	Microtubule-associated protein 4 OS=Mus musculus OX=10090 GN=Map4 PE=1 SV=3
Q8R395	COMD5_MOUSE	21.43	3	3	24.4862	24.895	24.4614	25.002	24493		COMM domain-containing protein 5 OS=Mus musculus OX=10090 GN=Commd5 PE=1 SV=1
Q8C0I1	ADAS_MOUSE	34.73	14	14	28.3951	29.1361	28.6285	28.459	71684	Oxidation (M)	Alkyldihydroxyacetonephosphate synthase, peroxisomal OS=Mus musculus OX=10090 GN=Agps PE=1 SV=1
Q00899	TYY1_MOUSE	15.46	4	4	24.6865	24.1946	24.7129	24.0526	44717	Oxidation (M)	Transcriptional repressor protein YY1 OS=Mus musculus OX=10090 GN=Yy1 PE=1 SV=1
Q8C3I8	HGH1_MOUSE	32.06	9	9	27.2445	27.5969	26.8974	27.5014	42916	Oxidation (M)	Protein HGH1 homolog OS=Mus musculus OX=10090 GN=Hgh1 PE=1 SV=1
Q8CGB6	TNS2_MOUSE	2.93	4	3	19.8562	23.3778	22.7542	23.3778	152013		Tensin-2 OS=Mus musculus OX=10090 GN=Tns2 PE=1 SV=1
Q9CWQ0	DPH5_MOUSE	25.98	5	5	25.3477	25.5841	25.6784	26.4154	31218	Oxidation (M)	Diphthine methyl ester synthase OS=Mus musculus OX=10090 GN=Dph5 PE=1 SV=2
Q8BK72	RT27_MOUSE	31.81	9	9	28.1747	27.6931	27.2891	27.9088	47779	Oxidation (M)	28S ribosomal protein S27, mitochondrial OS=Mus musculus OX=10090 GN=Mrps27 PE=1 SV=2
Q9CZX0	ELP3_MOUSE	31.99	12	12	29.9539	29.3001	29.5071	29.6998	62385	Oxidation (M)	Elongator complex protein 3 OS=Mus musculus OX=10090 GN=Elp3 PE=1 SV=1
P20067	ID1_MOUSE	21.43	2	2	23.9134	24.9406	23.4041	24.5463	17914		DNA-binding protein inhibitor ID-1 OS=Mus musculus OX=10090 GN=Id1 PE=1 SV=3
Q91X43	SH319_MOUSE	4.44	2	2	21.5964	20.2602	21.9454	19.278	86076		SH3 domain-containing protein 19 OS=Mus musculus OX=10090 GN=Sh3d19 PE=1 SV=2
Q8BLY7	HPS6_MOUSE	9.81	4	4	23.7077	24.5165	23.8576	23.654	87341		Hermansky-Pudlak syndrome 6 protein homolog OS=Mus musculus OX=10090 GN=Hps6 PE=1 SV=3
Q6PFX7	NYAP1_MOUSE	2.28	1	1	19.0584	19.78	22.4183	20.4677	87668		Neuronal tyrosine-phosphorylated phosphoinositide-3-kinase adapter 1 OS=Mus musculus OX=10090 GN=Nyap1 PE=1 SV=1
Q99LB7	SARDH_MOUSE	2.72	1	1	NaN	20.231	21.131	20.8462	101682		Sarcosine dehydrogenase, mitochondrial OS=Mus musculus OX=10090 GN=Sardh PE=1 SV=1
P29595	NEDD8_MOUSE	34.57	3	3	26.1546	25.0275	24.9134	25.6403	8972		NEDD8 OS=Mus musculus OX=10090 GN=Nedd8 PE=1 SV=2
Q5HZI9	S2551_MOUSE	6.38	1	1	20.3604	21.741	20.8931	21.4864	33689		Mitochondrial nicotinamide adenine dinucleotide transporter SLC25A51 OS=Mus musculus OX=10090 GN=Slc25a51 PE=1 SV=1
Q9JJF3	RIOX1_MOUSE	13.43	5	5	24.976	25.5696	24.9225	25.5195	67557		Ribosomal oxygenase 1 OS=Mus musculus OX=10090 GN=Riox1 PE=1 SV=2
P35285	RB22A_MOUSE	14.43	2	2	20.4496	23.2961	21.8457	22.1643	21802		Ras-related protein Rab-22A OS=Mus musculus OX=10090 GN=Rab22a PE=1 SV=2
Q8BG81	PDIP3_MOUSE	42.14	14	14	28.4512	28.9316	28.0864	29.8324	46132	Acetylation (N-term);Oxidation (M)	Polymerase delta-interacting protein 3 OS=Mus musculus OX=10090 GN=Poldip3 PE=1 SV=1
Q60649	CLPB_MOUSE	10.49	5	5	25.5255	26.3256	24.989	26.0084	76004	Oxidation (M)	Caseinolytic peptidase B protein homolog OS=Mus musculus OX=10090 GN=Clpb PE=1 SV=1
P21278	GNA11_MOUSE	21.73	8	5	28.2625	28.9923	28.203	28.8829	42024		Guanine nucleotide-binding protein subunit alpha-11 OS=Mus musculus OX=10090 GN=Gna11 PE=1 SV=1
Q791T5	MTCH1_MOUSE	13.88	4	4	25.6865	25.6486	25.8927	25.9316	41565	Oxidation (M)	Mitochondrial carrier homolog 1 OS=Mus musculus OX=10090 GN=Mtch1 PE=1 SV=1
P49182	HEP2_MOUSE	2.51	1	1	24.6375	23.417	23.5983	23.6757	54497	Oxidation (M)	Heparin cofactor 2 OS=Mus musculus OX=10090 GN=Serpind1 PE=1 SV=1
Q8CHH5	BICRL_MOUSE	1.12	1	1	19.0104	18.2524	18.4122	NaN	114350		BRD4-interacting chromatin-remodeling complex-associated protein-like OS=Mus musculus OX=10090 GN=Bicral PE=1 SV=2
P60904	DNJC5_MOUSE	44.44	4	4	27.1507	27.1312	26.8974	27.0711	22101		DnaJ homolog subfamily C member 5 OS=Mus musculus OX=10090 GN=Dnajc5 PE=1 SV=1
P29416	HEXA_MOUSE	6.25	3	3	25.5374	24.2535	24.1174	24.2961	60613		Beta-hexosaminidase subunit alpha OS=Mus musculus OX=10090 GN=Hexa PE=1 SV=2
P45700	MA1A1_MOUSE	4.43	2	2	23.045	23.867	22.4814	23.6649	73276		Mannosyl-oligosaccharide 1,2-alpha-mannosidase IA OS=Mus musculus OX=10090 GN=Man1a1 PE=1 SV=1
Q8BHA0	IN80C_MOUSE	24.08	3	3	23.1978	24.3031	23.5165	24.0772	20405	Acetylation (N-term)	INO80 complex subunit C OS=Mus musculus OX=10090 GN=Ino80c PE=1 SV=1
Q99N84	RT18B_MOUSE	23.62	2	2	22.6157	NaN	24.6096	22.6461	28703		28S ribosomal protein S18b, mitochondrial OS=Mus musculus OX=10090 GN=Mrps18b PE=1 SV=1
Q8VDY9	CAAP1_MOUSE	8.71	2	2	21.5316	20.9246	23.3376	23.2131	37825		Caspase activity and apoptosis inhibitor 1 OS=Mus musculus OX=10090 GN=Caap1 PE=1 SV=2
Q9JMC3	DNJA4_MOUSE	2.77	1	1	22.8812	22.8118	22.8809	22.5674	44902		DnaJ homolog subfamily A member 4 OS=Mus musculus OX=10090 GN=Dnaja4 PE=1 SV=1
Q8VDL9	GLIS2_MOUSE	2.11	1	1	21.6343	22.6896	21.0238	23.3376	55842	Acetylation (N-term);Oxidation (M)	Zinc finger protein GLIS2 OS=Mus musculus OX=10090 GN=Glis2 PE=1 SV=1
Q8R059	GALE_MOUSE	21.33	5	5	26.1795	26.391	26.4846	25.9134	38225	Oxidation (M)	UDP-glucose 4-epimerase OS=Mus musculus OX=10090 GN=Gale PE=1 SV=1
Q6IR34	GPSM1_MOUSE	12.04	5	5	24.7389	25.5404	24.918	25.1719	74362	Acetylation (N-term);Oxidation (M)	G-protein-signaling modulator 1 OS=Mus musculus OX=10090 GN=Gpsm1 PE=1 SV=3
Q9CR70	LAGE3_MOUSE	22.3	2	2	24.0935	24.3376	23.654	24.5638	15824	Acetylation (N-term);Oxidation (M)	EKC/KEOPS complex subunit Lage3 OS=Mus musculus OX=10090 GN=Lage3 PE=2 SV=1
O54967	ACK1_MOUSE	2.65	2	2	21.1826	19.6442	21.6691	21.976	116975		Activated CDC42 kinase 1 OS=Mus musculus OX=10090 GN=Tnk2 PE=1 SV=2
Q9DBH0	WWP2_MOUSE	1.84	2	1	21.7845	23.1015	22.186	21.785	98761		NEDD4-like E3 ubiquitin-protein ligase WWP2 OS=Mus musculus OX=10090 GN=Wwp2 PE=1 SV=1
Q8VDL4	ADPGK_MOUSE	36.49	10	10	28.5898	29.2308	28.267	29.3557	53902	Acetylation (N-term);Oxidation (M)	ADP-dependent glucokinase OS=Mus musculus OX=10090 GN=Adpgk PE=1 SV=2
P97351	RS3A_MOUSE	66.67	23	23	33.0911	33.4334	32.9259	33.4334	29885	Acetylation (N-term);NBF;Oxidation (M)	40S ribosomal protein S3a OS=Mus musculus OX=10090 GN=Rps3a PE=1 SV=3
Q9DAR7	DCPS_MOUSE	30.18	7	7	28.203	27.8445	28.0813	27.9595	38988		m7GpppX diphosphatase OS=Mus musculus OX=10090 GN=Dcps PE=1 SV=1
P12815	PDCD6_MOUSE	42.93	5	5	28.2759	28.5052	28.3153	28.391	21867	Acetylation (N-term)	Programmed cell death protein 6 OS=Mus musculus OX=10090 GN=Pdcd6 PE=1 SV=2
Q6NS82	RETR2_MOUSE	6.65	2	2	23.5045	22.3421	23.7286	22.5382	57542		Reticulophagy regulator 2 OS=Mus musculus OX=10090 GN=Retreg2 PE=1 SV=2
Q810V0	MPP10_MOUSE	17.47	7	7	27.3494	27.0505	27.1795	26.7645	78735	Oxidation (M)	U3 small nucleolar ribonucleoprotein protein MPP10 OS=Mus musculus OX=10090 GN=Mphosph10 PE=1 SV=2
Q5PSV9	MDC1_MOUSE	21.73	21	21	27.1604	27.1984	27.1604	26.9977	184670	NBF;Oxidation (M)	Mediator of DNA damage checkpoint protein 1 OS=Mus musculus OX=10090 GN=Mdc1 PE=1 SV=1
Q61166	MARE1_MOUSE	63.06	14	12	29.7802	30.2759	29.3704	30.0609	30016	Acetylation (N-term);Oxidation (M)	Microtubule-associated protein RP/EB family member 1 OS=Mus musculus OX=10090 GN=Mapre1 PE=1 SV=3
Q921F2	TADBP_MOUSE	27.78	9	9	30.4234	30.8081	30.4032	30.7129	44548	Oxidation (M)	TAR DNA-binding protein 43 OS=Mus musculus OX=10090 GN=Tardbp PE=1 SV=1
Q8BJM7	TYW1_MOUSE	3.88	2	2	22.7358	22.943	22.4809	23.8858	81599		S-adenosyl-L-methionine-dependent tRNA 4-demethylwyosine synthase TYW1 OS=Mus musculus OX=10090 GN=Tyw1 PE=1 SV=1
Q8VBT0	TMX1_MOUSE	11.51	4	4	28.4032	28.7486	28.003	28.4785	31396		Thioredoxin-related transmembrane protein 1 OS=Mus musculus OX=10090 GN=Tmx1 PE=1 SV=1
Q9CXE7	TMED5_MOUSE	9.17	2	2	26.4984	24.6649	26.2679	24.4425	26172		Transmembrane emp24 domain-containing protein 5 OS=Mus musculus OX=10090 GN=Tmed5 PE=1 SV=1
Q80UY2	KCMF1_MOUSE	34.12	6	6	26.4041	26.9316	26.2335	26.5754	41791	Oxidation (M)	E3 ubiquitin-protein ligase KCMF1 OS=Mus musculus OX=10090 GN=Kcmf1 PE=1 SV=1
Q6PDI5	ECM29_MOUSE	29.62	38	38	29.7692	29.8579	28.9203	30.1604	203703	Acetylation (N-term);Oxidation (M)	Proteasome adapter and scaffold protein ECM29 OS=Mus musculus OX=10090 GN=Ecpas PE=1 SV=3
Q62187	TTF1_MOUSE	4.31	2	2	21.9365	21.6901	21.2005	19.6411	97723		Transcription termination factor 1 OS=Mus musculus OX=10090 GN=Ttf1 PE=1 SV=2
Q9DC50	OCTC_MOUSE	13.56	5	5	26.4984	25.48	25.8881	26.1391	70264		Peroxisomal carnitine O-octanoyltransferase OS=Mus musculus OX=10090 GN=Crot PE=1 SV=1
Q9D7W5	MED8_MOUSE	5.22	1	1	24.9225	24.1719	24.317	24.3844	29199		Mediator of RNA polymerase II transcription subunit 8 OS=Mus musculus OX=10090 GN=Med8 PE=1 SV=1
Q8BQ89	LIX1L_MOUSE	15.13	4	4	24.6264	25.7846	24.391	25.2891	36606	Oxidation (M)	LIX1-like protein OS=Mus musculus OX=10090 GN=Lix1l PE=2 SV=2
Q8R2V2	IFFO2_MOUSE	4.88	1	1	19.7475	20.3714	18.6123	19.2514	56994		Intermediate filament family orphan 2 OS=Mus musculus OX=10090 GN=Iffo2 PE=2 SV=2
Q9QYH6	MAGD1_MOUSE	23.48	10	10	27.2625	27.7389	27.0711	27.3239	85670	Oxidation (M)	Melanoma-associated antigen D1 OS=Mus musculus OX=10090 GN=Maged1 PE=1 SV=1
Q9QUJ7	ACSL4_MOUSE	13.22	6	5	26.4186	25.3135	26.17	26.1352	79077	Oxidation (M)	Long-chain-fatty-acid--CoA ligase 4 OS=Mus musculus OX=10090 GN=Acsl4 PE=1 SV=2
Q922R8	PDIA6_MOUSE	39.55	15	15	32.099	32.3115	31.9746	32.3956	48100	NBF	Protein disulfide-isomerase A6 OS=Mus musculus OX=10090 GN=Pdia6 PE=1 SV=3
P51885	LUM_MOUSE	6.21	1	1	25.4362	23.1868	24.0609	24.1095	38265		Lumican OS=Mus musculus OX=10090 GN=Lum PE=1 SV=2
Q6ZQJ5	DNA2_MOUSE	5.27	3	3	20.2103	21.6236	22.7637	21.8388	119447	Acetylation (N-term);Oxidation (M)	DNA replication ATP-dependent helicase/nuclease DNA2 OS=Mus musculus OX=10090 GN=Dna2 PE=1 SV=2
A2ABV5	MED14_MOUSE	14.46	12	12	25.5522	25.3307	24.867	25.1833	160966	Oxidation (M)	Mediator of RNA polymerase II transcription subunit 14 OS=Mus musculus OX=10090 GN=Med14 PE=1 SV=1
Q8K157	GALM_MOUSE	4.09	1	1	21.4547	21.4327	21.8377	21.958	37799		Galactose mutarotase OS=Mus musculus OX=10090 GN=Galm PE=1 SV=1
Q3B7Z2	OSBP1_MOUSE	29.94	16	16	28.459	28.341	28.0296	28.3745	88797	Oxidation (M)	Oxysterol-binding protein 1 OS=Mus musculus OX=10090 GN=Osbp PE=1 SV=3
Q9D113	DNLZ_MOUSE	17.51	1	1	22.9816	22.2536	22.4405	22.5611	19403		DNL-type zinc finger protein OS=Mus musculus OX=10090 GN=Dnlz PE=1 SV=1
Q9CQ62	DECR_MOUSE	30.75	6	6	27.2714	27.3745	27.2353	27.2803	36214	Oxidation (M)	2,4-dienoyl-CoA reductase [(3E)-enoyl-CoA-producing], mitochondrial OS=Mus musculus OX=10090 GN=Decr1 PE=1 SV=1
Q8BPS4	GP180_MOUSE	7.48	1	1	23.5638	23.4041	23.7594	23.9584	48975	Oxidation (M)	Integral membrane protein GPR180 OS=Mus musculus OX=10090 GN=Gpr180 PE=1 SV=1
Q3UA37	QRIC1_MOUSE	15.19	8	8	27.7453	28.3324	27.5389	27.965	86556	Acetylation (N-term);Oxidation (M)	Transcriptional regulator QRICH1 OS=Mus musculus OX=10090 GN=Qrich1 PE=1 SV=1
E9Q236	MRP4_MOUSE	2.57	3	3	23.1763	22.5087	22.8335	22.9319	148888		ATP-binding cassette sub-family C member 4 OS=Mus musculus OX=10090 GN=Abcc4 PE=1 SV=1
Q61584	FXR1_MOUSE	47.56	28	26	29.217	29.8249	29.066	29.5844	76222	Acetylation (N-term);NBF;Oxidation (M)	Fragile X mental retardation syndrome-related protein 1 OS=Mus musculus OX=10090 GN=Fxr1 PE=1 SV=2
Q3UZW7	EF2KT_MOUSE	5.37	1	1	NaN	21.1742	20.7445	22.3748	36940	Acetylation (N-term);Oxidation (M)	Protein-lysine N-methyltransferase EEF2KMT OS=Mus musculus OX=10090 GN=Eef2kmt PE=1 SV=1
O88513	GEMI_MOUSE	7.28	1	1	22.9737	22.916	23.2162	22.1858	23300		Geminin OS=Mus musculus OX=10090 GN=Gmnn PE=1 SV=1
Q9JJ06	C1GLT_MOUSE	3.58	1	1	20.1821	21.5694	21.9174	21.618	42304		Glycoprotein-N-acetylgalactosamine 3-beta-galactosyltransferase 1 OS=Mus musculus OX=10090 GN=C1galt1 PE=1 SV=1
Q61315	APC_MOUSE	2.14	3	3	20.8757	21.0588	18.4825	18.8533	311089	Oxidation (M)	Adenomatous polyposis coli protein OS=Mus musculus OX=10090 GN=Apc PE=1 SV=1
Q8VCR3	TM242_MOUSE	16.43	1	1	21.2915	22.5245	19.1456	21.3127	14916	Acetylation (N-term);Oxidation (M)	Transmembrane protein 242 OS=Mus musculus OX=10090 GN=Tmem242 PE=2 SV=1
P08121	CO3A1_MOUSE	49.66	59	58	29.7739	30.2759	29.267	30.0864	138943	Acetylation (N-term);NBF;Oxidation (M)	Collagen alpha-1(III) chain OS=Mus musculus OX=10090 GN=Col3a1 PE=1 SV=4
G5E829	AT2B1_MOUSE	16.64	23	14	27.9146	28.341	27.5609	27.9923	134747	Acetylation (N-term);Oxidation (M)	Plasma membrane calcium-transporting ATPase 1 OS=Mus musculus OX=10090 GN=Atp2b1 PE=1 SV=1
Q9CQT1	MTNA_MOUSE	31.98	7	7	27.6251	27.8019	27.5898	28.2759	39411	Oxidation (M)	Methylthioribose-1-phosphate isomerase OS=Mus musculus OX=10090 GN=Mri1 PE=1 SV=1
Q60961	LAP4A_MOUSE	11.59	1	1	25.065	24.895	24.7594	24.8336	26858	Oxidation (M)	Lysosomal-associated transmembrane protein 4A OS=Mus musculus OX=10090 GN=Laptm4a PE=1 SV=1
P48024	EIF1_MOUSE	15.04	5	1	29.8887	30.1239	29.94	30.2647	12747	Acetylation (N-term)	Eukaryotic translation initiation factor 1 OS=Mus musculus OX=10090 GN=Eif1 PE=1 SV=2
Q9CXZ1	NDUS4_MOUSE	19.43	3	3	27.3662	27.509	27.17	27.2445	19785		NADH dehydrogenase [ubiquinone] iron-sulfur protein 4, mitochondrial OS=Mus musculus OX=10090 GN=Ndufs4 PE=1 SV=3
P06797	CATL1_MOUSE	17.96	4	4	27.391	27.9923	25.2243	23.976	37547	Oxidation (M)	Procathepsin L OS=Mus musculus OX=10090 GN=Ctsl PE=1 SV=2
Q569Z6	TR150_MOUSE	17.46	13	12	28.6831	29.027	28.2353	28.7708	108178	Oxidation (M)	Thyroid hormone receptor-associated protein 3 OS=Mus musculus OX=10090 GN=Thrap3 PE=1 SV=1
Q9QZ88	VPS29_MOUSE	34.62	5	5	29.0057	29.1065	28.6285	28.6216	20496	Oxidation (M)	Vacuolar protein sorting-associated protein 29 OS=Mus musculus OX=10090 GN=Vps29 PE=1 SV=1
Q9CQR6	PPP6_MOUSE	16.39	4	4	27.5536	28.267	27.2262	27.8623	35159	Oxidation (M)	Serine/threonine-protein phosphatase 6 catalytic subunit OS=Mus musculus OX=10090 GN=Ppp6c PE=1 SV=1
Q8VCW8	ACSF2_MOUSE	23.9	8	8	27.632	27.8564	27.5463	27.3153	67951	Oxidation (M)	Medium-chain acyl-CoA ligase ACSF2, mitochondrial OS=Mus musculus OX=10090 GN=Acsf2 PE=1 SV=1
Q99MD9	NASP_MOUSE	46.57	27	27	30.1115	30.1239	29.8741	29.6848	83954	Acetylation (N-term);Oxidation (M)	Nuclear autoantigenic sperm protein OS=Mus musculus OX=10090 GN=Nasp PE=1 SV=2
Q9JI46	NUDT3_MOUSE	26.19	3	3	25.9406	27.3066	26.4298	27.1604	19030	Oxidation (M)	Diphosphoinositol polyphosphate phosphohydrolase 1 OS=Mus musculus OX=10090 GN=Nudt3 PE=1 SV=1
E9Q4P1	WDFY1_MOUSE	11.95	4	4	26.5653	26.6181	24.604	25.0484	46218	Oxidation (M)	WD repeat and FYVE domain-containing protein 1 OS=Mus musculus OX=10090 GN=Wdfy1 PE=1 SV=1
Q80WW9	DDRGK_MOUSE	22.86	4	4	24.9584	25.8974	25.1604	25.2891	35977	Oxidation (M)	DDRGK domain-containing protein 1 OS=Mus musculus OX=10090 GN=Ddrgk1 PE=1 SV=2
O88544	CSN4_MOUSE	50.99	15	15	29.2353	29.5259	28.9705	29.2891	46285	Oxidation (M)	COP9 signalosome complex subunit 4 OS=Mus musculus OX=10090 GN=Cops4 PE=1 SV=1
Q99NB9	SF3B1_MOUSE	47.01	40	40	30.9539	30.7211	30.4032	30.3303	145816	Oxidation (M)	Splicing factor 3B subunit 1 OS=Mus musculus OX=10090 GN=Sf3b1 PE=1 SV=1
Q8VD31	TPSNR_MOUSE	4.21	1	1	22.532	23.8385	23.0406	22.7772	48733		Tapasin-related protein OS=Mus musculus OX=10090 GN=Tapbpl PE=1 SV=2
Q9CQA3	SDHB_MOUSE	20.21	5	5	28.2847	28.1984	28.217	27.7895	31814	Oxidation (M)	Succinate dehydrogenase [ubiquinone] iron-sulfur subunit, mitochondrial OS=Mus musculus OX=10090 GN=Sdhb PE=1 SV=1
Q3U186	SYRM_MOUSE	6.92	3	3	22.9614	23.5638	23.2679	24.2679	65336		Probable arginine--tRNA ligase, mitochondrial OS=Mus musculus OX=10090 GN=Rars2 PE=1 SV=1
Q8C3Q9	CASP9_MOUSE	2.2	1	1	22.4842	23.6971	22.5019	23.0298	49979		Caspase-9 OS=Mus musculus OX=10090 GN=Casp9 PE=1 SV=1
Q5SRX1	TM1L2_MOUSE	40.43	10	10	25.7594	25.4298	25.5812	26.4457	55663	Oxidation (M)	TOM1-like protein 2 OS=Mus musculus OX=10090 GN=Tom1l2 PE=1 SV=1
Q67FY2	BCL9L_MOUSE	7.16	5	5	23.9495	NaN	24.48	20.0365	156680	Oxidation (M)	B-cell CLL/lymphoma 9-like protein OS=Mus musculus OX=10090 GN=Bcl9l PE=1 SV=1
Q8BGA5	KRR1_MOUSE	10.53	3	3	25.9998	25.8093	25.8599	25.9847	43538		KRR1 small subunit processome component homolog OS=Mus musculus OX=10090 GN=Krr1 PE=2 SV=1
Q9ER00	STX12_MOUSE	33.58	5	5	28.0609	28.0813	28.632	27.7833	31195	Oxidation (M)	Syntaxin-12 OS=Mus musculus OX=10090 GN=Stx12 PE=1 SV=1
Q6P5E6	GGA2_MOUSE	20.56	6	6	25.019	25.5955	25.2961	25.5955	66049	Acetylation (N-term)	ADP-ribosylation factor-binding protein GGA2 OS=Mus musculus OX=10090 GN=Gga2 PE=1 SV=1
Q9CVB6	ARPC2_MOUSE	44	10	10	30.341	30.4823	30.0349	30.2647	34357	Oxidation (M)	Actin-related protein 2/3 complex subunit 2 OS=Mus musculus OX=10090 GN=Arpc2 PE=1 SV=3
Q9D4J7	PHF6_MOUSE	2.47	1	1	25.8118	26.0772	25.6431	26.0148	41139		PHD finger protein 6 OS=Mus musculus OX=10090 GN=Phf6 PE=1 SV=1
Q8VCB2	MED25_MOUSE	9.13	3	3	24.558	23.6209	25.065	23.1393	78113	Oxidation (M)	Mediator of RNA polymerase II transcription subunit 25 OS=Mus musculus OX=10090 GN=Med25 PE=1 SV=1
P97823	LYPA1_MOUSE	20.43	3	3	27.3745	27.2353	26.9977	27.611	24688		Acyl-protein thioesterase 1 OS=Mus musculus OX=10090 GN=Lypla1 PE=1 SV=1
P0C0S6	H2AZ_MOUSE	41.41	5	3	30.3303	30.7292	29.0531	29.8127	13553	Acetylation (N-term)	Histone H2A.Z OS=Mus musculus OX=10090 GN=H2az1 PE=1 SV=2
Q9D906	ATG7_MOUSE	17.77	8	8	22.381	24.0359	23.2961	23.3778	77520	Oxidation (M)	Ubiquitin-like modifier-activating enzyme ATG7 OS=Mus musculus OX=10090 GN=Atg7 PE=1 SV=1
Q1HFZ0	NSUN2_MOUSE	52.18	28	28	29.21	30.1483	28.877	29.5844	85452	Acetylation (N-term);NBF;Oxidation (M)	RNA cytosine C(5)-methyltransferase NSUN2 OS=Mus musculus OX=10090 GN=Nsun2 PE=1 SV=2
Q3TXU5	DHYS_MOUSE	28.18	7	7	25.4984	25.3943	25.2133	25.1015	40642	Acetylation (N-term);Oxidation (M)	Deoxyhypusine synthase OS=Mus musculus OX=10090 GN=Dhps PE=1 SV=2
Q9DB85	RRP8_MOUSE	12.25	4	4	24.9406	25.1371	24.8623	25.632	51066		Ribosomal RNA-processing protein 8 OS=Mus musculus OX=10090 GN=Rrp8 PE=1 SV=1
P60487	PLPP_MOUSE	17.47	3	3	25.3712	26.3066	25.2133	26.0464	31512		Chronophin OS=Mus musculus OX=10090 GN=Pdxp PE=1 SV=1
Q8VDZ4	ZDHC5_MOUSE	18.88	8	8	25.5135	25.7024	25.5551	25.3066	77501	Oxidation (M)	Palmitoyltransferase ZDHHC5 OS=Mus musculus OX=10090 GN=Zdhhc5 PE=1 SV=1
G3X9J0	SI1L3_MOUSE	8.56	9	9	24.0854	25.0233	23.3645	23.3645	195063	Acetylation (N-term);Oxidation (M)	Signal-induced proliferation-associated 1-like protein 3 OS=Mus musculus OX=10090 GN=Sipa1l3 PE=1 SV=1
Q505F1	NR2C1_MOUSE	7.46	2	2	23.2821	24.0691	23.7492	23.1606	65476	Acetylation (N-term);Oxidation (M)	Nuclear receptor subfamily 2 group C member 1 OS=Mus musculus OX=10090 GN=Nr2c1 PE=1 SV=3
Q9CQN7	RM41_MOUSE	37.04	4	4	26.8385	26.4629	26.1719	26.417	15262	Oxidation (M)	39S ribosomal protein L41, mitochondrial OS=Mus musculus OX=10090 GN=Mrpl41 PE=1 SV=1
Q80V26	IMPA3_MOUSE	35.96	6	6	28.189	28.3951	28.189	28.611	38616	Oxidation (M)	Golgi-resident adenosine 3',5'-bisphosphate 3'-phosphatase OS=Mus musculus OX=10090 GN=Bpnt2 PE=1 SV=1
Q7TMY4	THOC7_MOUSE	5.88	1	1	24.6703	24.3778	21.6105	24.0935	23715		THO complex subunit 7 homolog OS=Mus musculus OX=10090 GN=Thoc7 PE=1 SV=2
Q6ZPR5	NSMA3_MOUSE	12.39	7	7	25.7796	26.3222	25.8834	26.4536	93276	Acetylation (N-term)	Sphingomyelin phosphodiesterase 4 OS=Mus musculus OX=10090 GN=Smpd4 PE=1 SV=2
Q6ZQ88	KDM1A_MOUSE	28.37	13	13	26.7517	27.391	26.7771	27.1312	92851	Oxidation (M)	Lysine-specific histone demethylase 1A OS=Mus musculus OX=10090 GN=Kdm1a PE=1 SV=2
Q91ZV8	AGRA2_MOUSE	2.17	1	1	NaN	22.8534	21.4208	22.8991	143170		Adhesion G protein-coupled receptor A2 OS=Mus musculus OX=10090 GN=Adgra2 PE=1 SV=2
Q9WUK4	RFC2_MOUSE	34.67	9	9	27.7325	28.7096	27.0401	27.9595	38725	Oxidation (M)	Replication factor C subunit 2 OS=Mus musculus OX=10090 GN=Rfc2 PE=1 SV=1
Q920P5	KAD5_MOUSE	7.47	3	3	24.3031	24.4105	24.0105	24.7945	63323	Oxidation (M)	Adenylate kinase isoenzyme 5 OS=Mus musculus OX=10090 GN=Ak5 PE=1 SV=2
Q8VE98	CD276_MOUSE	9.49	2	2	24.1642	24.9406	24.1946	24.867	34001		CD276 antigen OS=Mus musculus OX=10090 GN=Cd276 PE=1 SV=1
Q91XI1	DUS3L_MOUSE	10.99	4	4	25.2785	25.6971	25.2353	25.8764	71078	Oxidation (M)	tRNA-dihydrouridine(47) synthase [NAD(P)(+)]-like OS=Mus musculus OX=10090 GN=Dus3l PE=1 SV=1
Q80V94	AP4E1_MOUSE	7.4	5	5	22.6424	23.654	23.2679	24.019	124845	Oxidation (M)	AP-4 complex subunit epsilon-1 OS=Mus musculus OX=10090 GN=Ap4e1 PE=1 SV=3
Q91YR1	TWF1_MOUSE	39.14	12	12	29.8142	29.7581	29.8203	29.4919	40079	Acetylation (N-term)	Twinfilin-1 OS=Mus musculus OX=10090 GN=Twf1 PE=1 SV=2
P17439	GLCM_MOUSE	14.95	5	5	25.848	26.604	26.0526	26.5419	57622	Oxidation (M)	Lysosomal acid glucosylceramidase OS=Mus musculus OX=10090 GN=Gba PE=1 SV=1
P97333	NRP1_MOUSE	17.23	10	10	26.1055	26.5135	26.1095	25.2317	103000	Oxidation (M)	Neuropilin-1 OS=Mus musculus OX=10090 GN=Nrp1 PE=1 SV=2
Q9Z138	ROR2_MOUSE	2.75	2	2	23.8191	24.6431	24.0935	25.9428	105005		Tyrosine-protein kinase transmembrane receptor ROR2 OS=Mus musculus OX=10090 GN=Ror2 PE=1 SV=2
P35822	PTPRK_MOUSE	5.56	5	5	24.8528	25.2353	24.1642	24.239	164186	Oxidation (M)	Receptor-type tyrosine-protein phosphatase kappa OS=Mus musculus OX=10090 GN=Ptprk PE=1 SV=1
Q60872	IF1A_MOUSE	14.58	2	2	29.6527	29.5481	29.2077	29.1532	16502		Eukaryotic translation initiation factor 1A OS=Mus musculus OX=10090 GN=Eif1a PE=2 SV=3
P19536	COX5B_MOUSE	33.59	3	3	28.9231	28.4823	28.611	27.9372	13813	Oxidation (M)	Cytochrome c oxidase subunit 5B, mitochondrial OS=Mus musculus OX=10090 GN=Cox5b PE=1 SV=1
P61027	RAB10_MOUSE	37.5	6	6	28.2216	28.2399	28.7096	29.0111	22541		Ras-related protein Rab-10 OS=Mus musculus OX=10090 GN=Rab10 PE=1 SV=1
P47791	GSHR_MOUSE	26.4	8	8	29.0864	28.976	29.0084	29.019	53663	Acetylation (N-term);Oxidation (M)	Glutathione reductase, mitochondrial OS=Mus musculus OX=10090 GN=Gsr PE=1 SV=3
Q3U2U7	MET17_MOUSE	2.17	1	1	20.1912	21.7552	20.202	22.2625	52061		Methyltransferase-like protein 17, mitochondrial OS=Mus musculus OX=10090 GN=Mettl17 PE=1 SV=2
Q3USH5	SFSWA_MOUSE	5.08	4	4	24.3578	24.4862	24.002	24.1095	104190		Splicing factor, suppressor of white-apricot homolog OS=Mus musculus OX=10090 GN=Sfswap PE=1 SV=2
Q01237	HMDH_MOUSE	3.16	2	2	23.5983	23.6971	23.3645	27.2353	97040		3-hydroxy-3-methylglutaryl-coenzyme A reductase OS=Mus musculus OX=10090 GN=Hmgcr PE=1 SV=3
Q8BHF7	PGPS1_MOUSE	11.57	4	4	24.8904	25.4831	24.4551	25.5345	62489		CDP-diacylglycerol--glycerol-3-phosphate 3-phosphatidyltransferase, mitochondrial OS=Mus musculus OX=10090 GN=Pgs1 PE=1 SV=1
Q60953	PML_MOUSE	14.12	7	7	26.2445	26.515	25.6486	26.3014	98242		Protein PML OS=Mus musculus OX=10090 GN=Pml PE=1 SV=3
O08738	CASP6_MOUSE	13.41	3	3	26.2499	26.673	25.8904	26.5536	31595		Caspase-6 OS=Mus musculus OX=10090 GN=Casp6 PE=1 SV=1
Q9Z1T1	AP3B1_MOUSE	12.22	10	9	27.2262	26.604	27.2353	26.632	122740	Oxidation (M)	AP-3 complex subunit beta-1 OS=Mus musculus OX=10090 GN=Ap3b1 PE=1 SV=2
Q9D8U8	SNX5_MOUSE	28.71	9	9	29.0401	29.2193	28.1842	28.7988	46797	Acetylation (N-term);Oxidation (M)	Sorting nexin-5 OS=Mus musculus OX=10090 GN=Snx5 PE=1 SV=1
Q9D710	TMX2_MOUSE	20	5	5	25.7441	25.9066	26.3745	25.9694	33943	Oxidation (M)	Thioredoxin-related transmembrane protein 2 OS=Mus musculus OX=10090 GN=Tmx2 PE=1 SV=1
Q8BFY6	PEF1_MOUSE	20	3	3	27.7517	28.6697	27.8799	28.5969	29228	Oxidation (M)	Peflin OS=Mus musculus OX=10090 GN=Pef1 PE=1 SV=1
Q91YT8	CSCL1_MOUSE	8.58	5	5	24.5285	25.9955	24.5045	26.0464	91860	Oxidation (M)	CSC1-like protein 1 OS=Mus musculus OX=10090 GN=Tmem63a PE=1 SV=1
Q8CFI2	UB2R1_MOUSE	10.21	2	2	26.965	27.1312	26.632	26.6998	26622		Ubiquitin-conjugating enzyme E2 R1 OS=Mus musculus OX=10090 GN=Cdc34 PE=1 SV=1
P14824	ANXA6_MOUSE	56.91	33	33	31.5062	32.0895	31.0673	31.978	75885	Acetylation (N-term);NBF;Oxidation (M)	Annexin A6 OS=Mus musculus OX=10090 GN=Anxa6 PE=1 SV=3
Q9R0A0	PEX14_MOUSE	36.17	6	6	27.0296	27.7453	26.8264	27.6527	41208	Acetylation (N-term);Oxidation (M)	Peroxisomal membrane protein PEX14 OS=Mus musculus OX=10090 GN=Pex14 PE=1 SV=1
P38585	TTL_MOUSE	14.59	3	3	23.8191	24.3975	23.976	24.2463	43136		Tubulin--tyrosine ligase OS=Mus musculus OX=10090 GN=Ttl PE=1 SV=2
Q8R3N6	THOC1_MOUSE	24.81	11	11	27.2714	27.9977	26.0588	27.673	75436	Oxidation (M)	THO complex subunit 1 OS=Mus musculus OX=10090 GN=Thoc1 PE=1 SV=1
Q8VCT3	AMPB_MOUSE	29.38	14	14	28.003	28.6251	27.8324	28.391	72416	Acetylation (N-term);Oxidation (M)	Aminopeptidase B OS=Mus musculus OX=10090 GN=Rnpep PE=1 SV=2
P97762	RP9_MOUSE	5.16	1	1	20.1198	18.6178	19.4973	19.9541	25262		Retinitis pigmentosa 9 protein homolog OS=Mus musculus OX=10090 GN=rp9 PE=1 SV=1
P24638	PPAL_MOUSE	3.31	1	1	20.4283	20.6417	19.5154	20.9741	48509	Oxidation (M)	Lysosomal acid phosphatase OS=Mus musculus OX=10090 GN=Acp2 PE=1 SV=2
Q4QY64	ATAD5_MOUSE	2.41	2	2	22.8874	21.7565	22.2353	21.354	203909		ATPase family AAA domain-containing protein 5 OS=Mus musculus OX=10090 GN=Atad5 PE=1 SV=1
P13705	MSH3_MOUSE	1.01	1	1	21.0774	21.2071	20.9939	21.8305	123074		DNA mismatch repair protein Msh3 OS=Mus musculus OX=10090 GN=Msh3 PE=2 SV=3
Q8BIG4	FBX28_MOUSE	7.34	2	2	21.4059	23.7077	23.0535	23.2157	40978	Oxidation (M)	F-box only protein 28 OS=Mus musculus OX=10090 GN=Fbxo28 PE=1 SV=1
Q8R1U1	COG4_MOUSE	23.82	12	12	26.0127	26.3273	25.824	26.4057	88661	Oxidation (M)	Conserved oligomeric Golgi complex subunit 4 OS=Mus musculus OX=10090 GN=Cog4 PE=1 SV=1
L0N7N1	KIF14_MOUSE	9.74	13	12	24.0275	23.6971	24.019	25.4831	186445	Oxidation (M)	Kinesin-like protein KIF14 OS=Mus musculus OX=10090 GN=Kif14 PE=1 SV=1
Q62384	ZPR1_MOUSE	23.53	8	8	27.965	27.9146	27.6865	27.8916	50715	Oxidation (M)	Zinc finger protein ZPR1 OS=Mus musculus OX=10090 GN=Zpr1 PE=1 SV=1
P22892	AP1G1_MOUSE	19.95	10	10	27.8916	28.1312	27.611	27.9428	91350	Oxidation (M)	AP-1 complex subunit gamma-1 OS=Mus musculus OX=10090 GN=Ap1g1 PE=1 SV=3
Q8BT60	CPNE3_MOUSE	11.82	6	4	27.3578	28.8593	28.1361	28.7676	59585	Oxidation (M)	Copine-3 OS=Mus musculus OX=10090 GN=Cpne3 PE=1 SV=2
Q9CQR2	RS21_MOUSE	68.67	9	9	32.3303	32.5822	31.7088	32.6501	9141	Acetylation (N-term);NBF;Oxidation (M)	40S ribosomal protein S21 OS=Mus musculus OX=10090 GN=Rps21 PE=1 SV=1
Q69ZR9	TASOR_MOUSE	6.02	5	5	22.6475	NaN	23.1585	23.079	181396	Acetylation (N-term)	Protein TASOR OS=Mus musculus OX=10090 GN=Tasor PE=1 SV=2
Q9D338	RM19_MOUSE	19.18	5	5	28.2979	27.9372	28.0296	28.0243	33578	Acetylation (N-term);Oxidation (M)	39S ribosomal protein L19, mitochondrial OS=Mus musculus OX=10090 GN=Mrpl19 PE=1 SV=1
P58022	LOXL2_MOUSE	3.99	2	2	23.7995	22.9197	24.019	23.5754	87003		Lysyl oxidase homolog 2 OS=Mus musculus OX=10090 GN=Loxl2 PE=1 SV=2
P48725	PCNT_MOUSE	7.76	14	14	28.9428	28.7739	28.0296	29.1337	329465	Oxidation (M)	Pericentrin OS=Mus musculus OX=10090 GN=Pcnt PE=1 SV=2
Q9CY52	THG1_MOUSE	7.72	2	2	24.7995	25.3101	24.6431	24.7895	34971		Probable tRNA(His) guanylyltransferase OS=Mus musculus OX=10090 GN=Thg1l PE=1 SV=1
Q9WTU6	MK09_MOUSE	1.89	3	1	19.0302	21.681	19.9757	18.8677	48189		Mitogen-activated protein kinase 9 OS=Mus musculus OX=10090 GN=Mapk9 PE=1 SV=2
Q3TQI7	TLS1_MOUSE	3.81	1	1	23.7594	24.1174	23.2679	23.5522	33544		Telomere length and silencing protein 1 homolog OS=Mus musculus OX=10090 PE=1 SV=2
Q6PIP5	NUDC1_MOUSE	21.13	8	8	27.8081	28.1937	27.3239	28.7064	66705	Oxidation (M)	NudC domain-containing protein 1 OS=Mus musculus OX=10090 GN=Nudcd1 PE=1 SV=2
P97360	ETV6_MOUSE	3.71	1	1	22.3185	23.6971	24.1871	24.019	56406	Oxidation (M)	Transcription factor ETV6 OS=Mus musculus OX=10090 GN=Etv6 PE=1 SV=1
Q61846	MELK_MOUSE	7.15	3	3	23.8288	25.3066	24.654	25.4266	72729	Oxidation (M)	Maternal embryonic leucine zipper kinase OS=Mus musculus OX=10090 GN=Melk PE=1 SV=2
Q9WU40	MAN1_MOUSE	29.21	15	15	29.0813	29.4374	29.1747	29.8004	100307	Acetylation (N-term);NBF;Oxidation (M)	Inner nuclear membrane protein Man1 OS=Mus musculus OX=10090 GN=Lemd3 PE=1 SV=2
Q61490	CD166_MOUSE	9.09	4	4	26.204	25.8264	25.9672	25.6595	65092		CD166 antigen OS=Mus musculus OX=10090 GN=Alcam PE=1 SV=3
Q80SY4	MIB1_MOUSE	6.06	4	4	24.4362	24.3239	24.1253	23.8576	110088		E3 ubiquitin-protein ligase MIB1 OS=Mus musculus OX=10090 GN=Mib1 PE=1 SV=1
Q6PA06	ATLA2_MOUSE	23.5	9	9	25.6375	25.4008	26.1293	25.6125	66224	Oxidation (M)	Atlastin-2 OS=Mus musculus OX=10090 GN=Atl2 PE=1 SV=1
Q9ERB0	SNP29_MOUSE	35	6	6	26.7771	26.9316	25.9495	26.574	29572	Oxidation (M)	Synaptosomal-associated protein 29 OS=Mus musculus OX=10090 GN=Snap29 PE=1 SV=1
Q6DFW4	NOP58_MOUSE	43.84	17	17	31.1483	31.8081	30.3303	31.5343	60343	Oxidation (M)	Nucleolar protein 58 OS=Mus musculus OX=10090 GN=Nop58 PE=1 SV=1
O35864	CSN5_MOUSE	36.83	8	8	27.9428	28.2445	27.7708	28.1842	37549	Oxidation (M)	COP9 signalosome complex subunit 5 OS=Mus musculus OX=10090 GN=Cops5 PE=1 SV=3
Q4VAE3	TMM65_MOUSE	10.68	2	2	25.1488	25.902	24.7338	25.3778	24918	Oxidation (M)	Transmembrane protein 65 OS=Mus musculus OX=10090 GN=Tmem65 PE=1 SV=1
Q8BGR9	UBCP1_MOUSE	6.6	1	1	21.9717	21.5538	22.9724	24.8044	36837		Ubiquitin-like domain-containing CTD phosphatase 1 OS=Mus musculus OX=10090 GN=Ublcp1 PE=1 SV=1
Q9DD02	HIKES_MOUSE	26.9	2	2	24.945	25.604	24.4862	24.9977	21619		Protein Hikeshi OS=Mus musculus OX=10090 GN=Hikeshi PE=1 SV=1
Q9QVP9	FAK2_MOUSE	4.06	3	3	23.3101	23.6209	23.3778	23.3645	115794		Protein-tyrosine kinase 2-beta OS=Mus musculus OX=10090 GN=Ptk2b PE=1 SV=2
P57759	ERP29_MOUSE	37.4	8	8	29.0217	29.5736	29.0084	29.4374	28823	Oxidation (M)	Endoplasmic reticulum resident protein 29 OS=Mus musculus OX=10090 GN=Erp29 PE=1 SV=2
P49615	CDK5_MOUSE	16.1	3	3	23.8385	24.2961	23.8093	23.4551	33288	Oxidation (M)	Cyclin-dependent-like kinase 5 OS=Mus musculus OX=10090 GN=Cdk5 PE=1 SV=1
Q8BPB0	MOB1B_MOUSE	32.87	6	6	28.5646	28.5933	28.0137	28.9174	25091	Oxidation (M)	MOB kinase activator 1B OS=Mus musculus OX=10090 GN=Mob1b PE=1 SV=3
O54775	CCN4_MOUSE	3	1	1	21.4953	22.3614	20.5531	21.6981	40703		CCN family member 4 OS=Mus musculus OX=10090 GN=Ccn4 PE=2 SV=1
Q9EPT5	SO2A1_MOUSE	1.56	1	1	19.4351	23.8288	22.3859	24.1332	70147		Solute carrier organic anion transporter family member 2A1 OS=Mus musculus OX=10090 GN=Slco2a1 PE=1 SV=2
P25206	MCM3_MOUSE	52.96	32	32	30.9188	31.6242	30.3828	31.4134	91546	Acetylation (N-term);Oxidation (M)	DNA replication licensing factor MCM3 OS=Mus musculus OX=10090 GN=Mcm3 PE=1 SV=2
Q7M6Y3	PICAL_MOUSE	42.42	16	16	30.6022	30.9259	29.8959	30.2422	71543	Oxidation (M)	Phosphatidylinositol-binding clathrin assembly protein OS=Mus musculus OX=10090 GN=Picalm PE=1 SV=1
Q8BY71	HAT1_MOUSE	27.4	7	7	29.7565	30.933	29.6798	30.6544	49278	Oxidation (M)	Histone acetyltransferase type B catalytic subunit OS=Mus musculus OX=10090 GN=Hat1 PE=1 SV=1
Q71FD7	FBLI1_MOUSE	21.07	4	4	27.4234	27.4234	28.2123	28.0401	41026	Oxidation (M)	Filamin-binding LIM protein 1 OS=Mus musculus OX=10090 GN=Fblim1 PE=1 SV=2
Q921Z5	TFIP8_MOUSE	10.1	1	1	23.5754	23.417	23.1005	23.2679	22960		Tumor necrosis factor alpha-induced protein 8 OS=Mus musculus OX=10090 GN=Tnfaip8 PE=1 SV=1
Q8K2C7	OS9_MOUSE	13.99	5	5	25.0854	25.6264	25.0732	25.317	76108	Oxidation (M)	Protein OS-9 OS=Mus musculus OX=10090 GN=Os9 PE=1 SV=2
Q9D1C1	UBE2C_MOUSE	36.87	5	5	29.6268	29.9539	29.3971	29.7113	19606		Ubiquitin-conjugating enzyme E2 C OS=Mus musculus OX=10090 GN=Ube2c PE=1 SV=1
P0C0A3	CHMP6_MOUSE	6.5	1	1	24.7024	25.1565	24.824	24.7695	23416		Charged multivesicular body protein 6 OS=Mus musculus OX=10090 GN=Chmp6 PE=1 SV=2
Q9CZ13	QCR1_MOUSE	30.42	9	9	29.4453	29.7864	29.104	29.5916	52852	Oxidation (M)	Cytochrome b-c1 complex subunit 1, mitochondrial OS=Mus musculus OX=10090 GN=Uqcrc1 PE=1 SV=2
Q923E4	SIR1_MOUSE	26.32	12	12	26.3729	24.7286	25.141	24.7182	80372	Acetylation (N-term);NBF;Oxidation (M)	NAD-dependent protein deacetylase sirtuin-1 OS=Mus musculus OX=10090 GN=Sirt1 PE=1 SV=2
Q9Z0U0	XPR1_MOUSE	3.74	1	1	23.1895	23.848	22.6739	23.5869	81751	Oxidation (M)	Xenotropic and polytropic retrovirus receptor 1 OS=Mus musculus OX=10090 GN=Xpr1 PE=1 SV=1
P50396	GDIA_MOUSE	32.89	16	12	29.7864	29.84	29.8355	29.3578	50522	Oxidation (M)	Rab GDP dissociation inhibitor alpha OS=Mus musculus OX=10090 GN=Gdi1 PE=1 SV=3
Q6NVG1	LPCT4_MOUSE	5.15	2	2	21.7087	23.2679	22.7367	25.989	57143		Lysophospholipid acyltransferase LPCAT4 OS=Mus musculus OX=10090 GN=Lpcat4 PE=1 SV=1
Q9CPX7	RT16_MOUSE	20.74	2	2	24.1642	23.1683	24.4862	23.8385	15192		28S ribosomal protein S16, mitochondrial OS=Mus musculus OX=10090 GN=Mrps16 PE=1 SV=1
Q61140	BCAR1_MOUSE	36.04	19	19	27.2445	27.4394	27.5826	27.019	94285	Oxidation (M)	Breast cancer anti-estrogen resistance protein 1 OS=Mus musculus OX=10090 GN=Bcar1 PE=1 SV=2
P49070	CAMLG_MOUSE	32.99	5	5	24.8811	25.3031	24.8528	25.4551	32542	Acetylation (N-term);Oxidation (M)	Guided entry of tail-anchored proteins factor CAMLG OS=Mus musculus OX=10090 GN=Camlg PE=1 SV=2
Q91W40	KLC3_MOUSE	14.57	5	5	23.8764	23.895	24.002	23.6971	56006		Kinesin light chain 3 OS=Mus musculus OX=10090 GN=Klc3 PE=1 SV=1
Q9DB70	FUND1_MOUSE	18.71	2	2	23.8858	23.4923	23.867	23.2821	17159	Oxidation (M)	FUN14 domain-containing protein 1 OS=Mus musculus OX=10090 GN=Fundc1 PE=1 SV=1
Q9DAI2	IFT22_MOUSE	20	2	2	23.632	23.9933	22.6799	22.5494	20833		Intraflagellar transport protein 22 homolog OS=Mus musculus OX=10090 GN=Ift22 PE=1 SV=1
Q8C407	YIPF4_MOUSE	19.92	2	2	24.6375	23.4676	24.1095	23.8576	27283	Acetylation (N-term);Oxidation (M)	Protein YIPF4 OS=Mus musculus OX=10090 GN=Yipf4 PE=1 SV=1
P62069	UBP46_MOUSE	4.92	1	1	21.324	21.4222	21.6441	21.0345	42442		Ubiquitin carboxyl-terminal hydrolase 46 OS=Mus musculus OX=10090 GN=Usp46 PE=1 SV=1
Q52KG4	ZBT45_MOUSE	4.62	1	1	NaN	22.0632	22.0542	22.462	55012		Zinc finger and BTB domain-containing protein 45 OS=Mus musculus OX=10090 GN=Zbtb45 PE=2 SV=1
P97454	SMAD5_MOUSE	6.67	5	2	25.1984	25.1604	24.6918	25.1095	52172	Oxidation (M)	Mothers against decapentaplegic homolog 5 OS=Mus musculus OX=10090 GN=Smad5 PE=1 SV=2
Q9CQC9	SAR1B_MOUSE	38.38	5	4	27.7325	27.0505	27.3494	27.391	22382	Oxidation (M)	GTP-binding protein SAR1b OS=Mus musculus OX=10090 GN=Sar1b PE=1 SV=1
Q3UHX2	HAP28_MOUSE	22.65	5	5	29.6798	30.0609	29.1652	29.8355	20605		28 kDa heat- and acid-stable phosphoprotein OS=Mus musculus OX=10090 GN=Pdap1 PE=1 SV=1
Q8BMD8	SCMC1_MOUSE	34.11	10	10	27.9146	28.5389	27.8974	28.7739	52902	Oxidation (M)	Calcium-binding mitochondrial carrier protein SCaMC-1 OS=Mus musculus OX=10090 GN=Slc25a24 PE=1 SV=1
P04184	KITH_MOUSE	31.33	5	5	26.0752	25.6403	26.0874	26.1681	25776	Acetylation (N-term);Oxidation (M)	Thymidine kinase, cytosolic OS=Mus musculus OX=10090 GN=Tk1 PE=1 SV=3
Q61818	RAI1_MOUSE	3.39	3	3	18.4654	20.8904	21.6453	24.141	201571	Acetylation (N-term);NBF	Retinoic acid-induced protein 1 OS=Mus musculus OX=10090 GN=Rai1 PE=1 SV=3
E9Q5K9	YTDC1_MOUSE	6.52	2	2	23.848	22.1105	23.7695	23.6431	85649		YTH domain-containing protein 1 OS=Mus musculus OX=10090 GN=Ythdc1 PE=1 SV=2
Q8C0D5	EFL1_MOUSE	13.22	10	10	25.8904	27.1312	26.1623	26.8019	125777	Oxidation (M)	Elongation factor-like GTPase 1 OS=Mus musculus OX=10090 GN=Efl1 PE=1 SV=1
Q8R409	HEXI1_MOUSE	8.99	2	2	25.7312	25.5463	25.5492	25.7389	40243		Protein HEXIM1 OS=Mus musculus OX=10090 GN=Hexim1 PE=1 SV=1
Q6P9P6	KIF11_MOUSE	28.14	24	24	27.9539	28.4668	27.3828	28.0243	118027	Oxidation (M)	Kinesin-like protein KIF11 OS=Mus musculus OX=10090 GN=Kif11 PE=1 SV=1
Q9D0F6	RFC5_MOUSE	50.15	11	11	27.7708	28.3196	27.604	28.3745	38096	Acetylation (N-term);Oxidation (M)	Replication factor C subunit 5 OS=Mus musculus OX=10090 GN=Rfc5 PE=1 SV=1
Q99JI4	PSMD6_MOUSE	53.73	20	20	30.099	30.611	30.0084	30.5573	45536	Oxidation (M)	26S proteasome non-ATPase regulatory subunit 6 OS=Mus musculus OX=10090 GN=Psmd6 PE=1 SV=1
Q68FD5	CLH1_MOUSE	44.3	56	56	31.8571	32.2647	31.7573	32.4058	191557	NBF;Oxidation (M)	Clathrin heavy chain 1 OS=Mus musculus OX=10090 GN=Cltc PE=1 SV=3
Q921U8	SMTN_MOUSE	36.51	20	20	27.341	27.7129	26.726	27.4473	100289	Acetylation (N-term);NBF;Oxidation (M)	Smoothelin OS=Mus musculus OX=10090 GN=Smtn PE=1 SV=2
Q91VM5	RMXL1_MOUSE	4.9	5	1	26.1155	26.8741	25.5522	27.0711	42162	Oxidation (M)	RNA binding motif protein, X-linked-like-1 OS=Mus musculus OX=10090 GN=Rbmxl1 PE=2 SV=1
P10852	4F2_MOUSE	32.51	16	16	30.2759	30.3828	29.8065	30.2077	58337	Acetylation (N-term);Oxidation (M)	4F2 cell-surface antigen heavy chain OS=Mus musculus OX=10090 GN=Slc3a2 PE=1 SV=1
Q9D0C4	TRM5_MOUSE	16.97	7	7	29.2714	30.0217	28.5862	29.7549	56794		tRNA (guanine(37)-N1)-methyltransferase OS=Mus musculus OX=10090 GN=Trmt5 PE=1 SV=1
Q8R2K4	TAF6L_MOUSE	10.71	5	5	24.3511	25.3204	24.2463	25.0772	67236		TAF6-like RNA polymerase II p300/CBP-associated factor-associated factor 65 kDa subunit 6L OS=Mus musculus OX=10090 GN=Taf6l PE=1 SV=1
Q9D0E1	HNRPM_MOUSE	56.1	30	30	32.622	33.0769	31.9117	32.8955	77649	Acetylation (N-term);NBF;Oxidation (M)	Heterogeneous nuclear ribonucleoprotein M OS=Mus musculus OX=10090 GN=Hnrnpm PE=1 SV=3
P70459	ERF_MOUSE	13.43	4	4	24.9361	25.2353	25.4105	24.9933	59050	Acetylation (N-term)	ETS domain-containing transcription factor ERF OS=Mus musculus OX=10090 GN=Erf PE=1 SV=1
Q9ESE1	LRBA_MOUSE	2.45	4	4	23.3376	23.6209	23.0059	23.632	317064		Lipopolysaccharide-responsive and beige-like anchor protein OS=Mus musculus OX=10090 GN=Lrba PE=1 SV=1
Q9D9V3	ECHD1_MOUSE	12.42	3	3	25.1293	25.4234	25.1871	25.4234	35467		Ethylmalonyl-CoA decarboxylase OS=Mus musculus OX=10090 GN=Echdc1 PE=1 SV=2
Q9QZL0	RIPK3_MOUSE	31.89	11	11	27.0711	26.8504	26.726	26.8504	53322		Receptor-interacting serine/threonine-protein kinase 3 OS=Mus musculus OX=10090 GN=Ripk3 PE=1 SV=2
Q922G0	S2536_MOUSE	4.18	1	1	22.1218	22.4811	21.5721	22.5485	34170		Solute carrier family 25 member 36 OS=Mus musculus OX=10090 GN=Slc25a36 PE=2 SV=1
Q9DBD5	PELP1_MOUSE	19.23	13	13	28.3109	28.5609	28.2216	29.21	118069	Acetylation (N-term);Oxidation (M)	Proline-, glutamic acid- and leucine-rich protein 1 OS=Mus musculus OX=10090 GN=Pelp1 PE=1 SV=2
Q922Q4	P5CR2_MOUSE	32.19	9	8	28.995	28.6629	28.6764	28.5052	33659	Acetylation (N-term);NBF;Oxidation (M)	Pyrroline-5-carboxylate reductase 2 OS=Mus musculus OX=10090 GN=Pycr2 PE=1 SV=1
Q8BGK6	YLAT2_MOUSE	6.8	2	2	25.417	25.7645	25.6237	25.2679	56771	Acetylation (N-term);Oxidation (M)	Y+L amino acid transporter 2 OS=Mus musculus OX=10090 GN=Slc7a6 PE=1 SV=1
Q9WU28	PFD5_MOUSE	45.45	4	4	28.7958	28.391	28.877	28.8445	17356	Acetylation (N-term);Oxidation (M)	Prefoldin subunit 5 OS=Mus musculus OX=10090 GN=Pfdn5 PE=1 SV=1
Q4VAA7	SNX33_MOUSE	7.32	3	3	23.2332	23.062	22.8631	23.2961	65315	Oxidation (M)	Sorting nexin-33 OS=Mus musculus OX=10090 GN=Snx33 PE=1 SV=1
Q9D1Q6	ERP44_MOUSE	39.66	10	10	29.0243	28.9203	28.5718	28.7549	46853	Oxidation (M)	Endoplasmic reticulum resident protein 44 OS=Mus musculus OX=10090 GN=Erp44 PE=1 SV=1
Q8BSK8	KS6B1_MOUSE	16	3	3	25.3204	24.9495	24.6918	24.989	59146	Oxidation (M)	Ribosomal protein S6 kinase beta-1 OS=Mus musculus OX=10090 GN=Rps6kb1 PE=1 SV=2
P13808	B3A2_MOUSE	10.02	6	6	24.2317	23.417	24.1488	24.275	136814	Oxidation (M)	Anion exchange protein 2 OS=Mus musculus OX=10090 GN=Slc4a2 PE=1 SV=1
Q9Z1D1	EIF3G_MOUSE	36.25	8	8	30.1483	30.1842	29.8112	30.0349	35638	Oxidation (M)	Eukaryotic translation initiation factor 3 subunit G OS=Mus musculus OX=10090 GN=Eif3g PE=1 SV=2
Q8BL99	DOP1_MOUSE	2.13	3	3	20.3665	21.9453	22.137	21.3	269257		Protein dopey-1 OS=Mus musculus OX=10090 GN=Dop1a PE=1 SV=2
P58929	GMEB2_MOUSE	5.85	1	1	22.4185	NaN	21.9012	21.4576	56631	Acetylation (N-term);Oxidation (M)	Glucocorticoid modulatory element-binding protein 2 OS=Mus musculus OX=10090 GN=Gmeb2 PE=2 SV=2
P35288	RAB23_MOUSE	18.57	3	3	26.391	25.3712	26.5225	25.317	26678	Acetylation (N-term);Oxidation (M)	Ras-related protein Rab-23 OS=Mus musculus OX=10090 GN=Rab23 PE=1 SV=2
B2RRE7	OTUD4_MOUSE	16.44	12	12	29.1483	29.0583	27.4785	28.3109	123055	Acetylation (N-term);Oxidation (M)	OTU domain-containing protein 4 OS=Mus musculus OX=10090 GN=Otud4 PE=1 SV=1
Q9D0M0	EXOS7_MOUSE	16.49	4	4	26.4441	26.8623	25.9869	26.9539	31825	Acetylation (N-term)	Exosome complex exonuclease RRP42 OS=Mus musculus OX=10090 GN=Exosc7 PE=1 SV=2
Q9D023	MPC2_MOUSE	9.45	1	1	19.5174	21.011	20.6603	17.2897	14286		Mitochondrial pyruvate carrier 2 OS=Mus musculus OX=10090 GN=Mpc2 PE=1 SV=1
Q9QYI4	DJB12_MOUSE	23.94	5	5	26.3943	26.6998	26.2785	26.1055	41988		DnaJ homolog subfamily B member 12 OS=Mus musculus OX=10090 GN=Dnajb12 PE=1 SV=2
P25976	UBF1_MOUSE	18.04	11	11	28.2353	28.8504	28.0609	28.5352	89509	Oxidation (M)	Nucleolar transcription factor 1 OS=Mus musculus OX=10090 GN=Ubtf PE=1 SV=1
Q6P6J4	ALKB2_MOUSE	8.37	1	1	18.5857	20.1189	18.3896	NaN	27129		DNA oxidative demethylase ALKBH2 OS=Mus musculus OX=10090 GN=Alkbh2 PE=1 SV=1
Q05186	RCN1_MOUSE	36.92	7	7	27.5014	27.6663	26.9203	26.3101	38113	Oxidation (M)	Reticulocalbin-1 OS=Mus musculus OX=10090 GN=Rcn1 PE=1 SV=1
Q922V4	PLRG1_MOUSE	28.07	10	10	27.509	28.249	27.6389	27.8081	56938	Oxidation (M)	Pleiotropic regulator 1 OS=Mus musculus OX=10090 GN=Plrg1 PE=1 SV=1
Q3V300	KIF22_MOUSE	23.64	11	11	25.065	25.1174	24.9977	24.7745	73190	Oxidation (M)	Kinesin-like protein KIF22 OS=Mus musculus OX=10090 GN=Kif22 PE=2 SV=2
Q8BGB7	ENOPH_MOUSE	18.29	3	3	27.2891	26.6595	27.2262	26.6998	28600		Enolase-phosphatase E1 OS=Mus musculus OX=10090 GN=Enoph1 PE=1 SV=1
P35585	AP1M1_MOUSE	38.3	11	11	27.5826	28.0505	27.2077	27.9203	48543	Acetylation (N-term);Oxidation (M)	AP-1 complex subunit mu-1 OS=Mus musculus OX=10090 GN=Ap1m1 PE=1 SV=3
Q6NV83	SR140_MOUSE	22.84	16	16	27.5463	27.2262	27.509	27.17	118261	Oxidation (M)	U2 snRNP-associated SURP motif-containing protein OS=Mus musculus OX=10090 GN=U2surp PE=1 SV=3
Q9QZS3	NUMB_MOUSE	5.67	3	3	23.4298	23.8764	24.2535	23.8093	70813		Protein numb homolog OS=Mus musculus OX=10090 GN=Numb PE=1 SV=1
P58468	F207A_MOUSE	46.58	7	7	27.0609	27.7708	27.4862	27.5898	24814	Oxidation (M)	Protein FAM207A OS=Mus musculus OX=10090 GN=Fam207a PE=1 SV=1
P35486	ODPA_MOUSE	28.46	9	9	29.5627	30.2422	29.0686	30.0864	43232	Oxidation (M)	Pyruvate dehydrogenase E1 component subunit alpha, somatic form, mitochondrial OS=Mus musculus OX=10090 GN=Pdha1 PE=1 SV=1
Q9CSU0	RPR1B_MOUSE	36.2	9	8	27.8741	28.1556	27.5536	27.8504	36884	Acetylation (N-term);Oxidation (M)	Regulation of nuclear pre-mRNA domain-containing protein 1B OS=Mus musculus OX=10090 GN=Rprd1b PE=1 SV=2
Q9D289	TPC6B_MOUSE	12.03	1	1	23.7995	23.8288	24.7338	24.8433	17936	Acetylation (N-term);Oxidation (M)	Trafficking protein particle complex subunit 6B OS=Mus musculus OX=10090 GN=Trappc6b PE=1 SV=1
Q3U829	AP5Z1_MOUSE	2.6	1	1	NaN	21.1942	19.9689	20.8776	89407		AP-5 complex subunit zeta-1 OS=Mus musculus OX=10090 GN=Ap5z1 PE=2 SV=1
Q8BGA9	OXA1L_MOUSE	6.24	2	2	24.275	24.1332	23.9134	23.6865	48220		Mitochondrial inner membrane protein OXA1L OS=Mus musculus OX=10090 GN=Oxa1l PE=1 SV=1
Q8BFQ4	WDR82_MOUSE	22.04	4	4	27.1795	27.0084	27.0296	26.9869	35079	Oxidation (M)	WD repeat-containing protein 82 OS=Mus musculus OX=10090 GN=Wdr82 PE=1 SV=1
Q8K007	SULF1_MOUSE	9.31	7	7	27.7064	28.7031	27.4707	28.2935	100923	Oxidation (M)	Extracellular sulfatase Sulf-1 OS=Mus musculus OX=10090 GN=Sulf1 PE=2 SV=1
E9Q414	APOB_MOUSE	0.8	3	3	26.8858	26.726	26.632	26.7389	509432		Apolipoprotein B-100 OS=Mus musculus OX=10090 GN=Apob PE=1 SV=1
P49442	INPP_MOUSE	11.62	3	3	25.8528	25.7945	25.8409	25.6431	43346		Inositol polyphosphate 1-phosphatase OS=Mus musculus OX=10090 GN=Inpp1 PE=1 SV=2
Q8VCF0	MAVS_MOUSE	42.15	11	11	26.239	26.7517	26.4815	25.604	53399	Oxidation (M)	Mitochondrial antiviral-signaling protein OS=Mus musculus OX=10090 GN=Mavs PE=1 SV=1
P42232	STA5B_MOUSE	1.78	8	1	22.0804	22.9767	22.4699	23.028	90002		Signal transducer and activator of transcription 5B OS=Mus musculus OX=10090 GN=Stat5b PE=1 SV=1
Q9CXK8	NIP7_MOUSE	39.44	4	4	26.239	26.2077	26.391	26.8264	20452	Oxidation (M)	60S ribosome subunit biogenesis protein NIP7 homolog OS=Mus musculus OX=10090 GN=Nip7 PE=1 SV=1
Q6PE54	DHX40_MOUSE	3.98	2	2	21.355	19.6359	22.2469	20.7435	88530		Probable ATP-dependent RNA helicase DHX40 OS=Mus musculus OX=10090 GN=Dhx40 PE=1 SV=1
Q3UMF0	COBL1_MOUSE	19.8	15	15	25.8974	24.9628	25.4984	26.3049	137382	Oxidation (M)	Cordon-bleu protein-like 1 OS=Mus musculus OX=10090 GN=Cobll1 PE=1 SV=2
Q61598	GDIB_MOUSE	45.17	23	19	31.2365	31.2535	31.3672	31.525	50537	NBF;Oxidation (M)	Rab GDP dissociation inhibitor beta OS=Mus musculus OX=10090 GN=Gdi2 PE=1 SV=1
Q5NCR9	NSRP1_MOUSE	9.59	3	3	23.4551	22.0837	23.4041	21.4905	63799	Oxidation (M)	Nuclear speckle splicing regulatory protein 1 OS=Mus musculus OX=10090 GN=Nsrp1 PE=1 SV=1
Q9DBW3	NATD1_MOUSE	27.27	2	2	22.7977	24.1095	23.5045	24.0609	12731	Acetylation (N-term)	Protein NATD1 OS=Mus musculus OX=10090 GN=Natd1 PE=1 SV=1
Q8C0E3	TRI47_MOUSE	28.39	11	11	28.6629	29.2147	28.4823	28.9539	69912	Acetylation (N-term);Oxidation (M)	E3 ubiquitin-protein ligase TRIM47 OS=Mus musculus OX=10090 GN=Trim47 PE=1 SV=2
Q8BGQ1	SPE39_MOUSE	7.33	2	2	23.4676	23.0049	22.9736	21.874	56625		Spermatogenesis-defective protein 39 homolog OS=Mus musculus OX=10090 GN=Vipas39 PE=1 SV=1
P63038	CH60_MOUSE	74	40	40	33.3568	33.3169	33.2619	33.3436	60955	Acetylation (N-term);NBF;Oxidation (M)	60 kDa heat shock protein, mitochondrial OS=Mus musculus OX=10090 GN=Hspd1 PE=1 SV=1
Q91Y86	MK08_MOUSE	3.91	3	1	23.9933	23.0441	23.976	23.5869	44229		Mitogen-activated protein kinase 8 OS=Mus musculus OX=10090 GN=Mapk8 PE=1 SV=1
Q6A039	TBC12_MOUSE	6.32	3	3	22.1741	23.1118	22.3635	22.9364	76810		TBC1 domain family member 12 OS=Mus musculus OX=10090 GN=Tbc1d12 PE=1 SV=2
Q99N89	RM43_MOUSE	12.57	2	2	24.8385	25.1449	24.4738	25.1604	20203		39S ribosomal protein L43, mitochondrial OS=Mus musculus OX=10090 GN=Mrpl43 PE=1 SV=1
Q6P4S6	SIK3_MOUSE	4.65	5	5	24.8811	25.6649	24.7234	25.1681	145784	Oxidation (M)	Serine/threonine-protein kinase SIK3 OS=Mus musculus OX=10090 GN=Sik3 PE=1 SV=3
Q8BKF1	RPOM_MOUSE	7.13	5	5	25.632	24.9672	25.6784	25.6811	136705	Oxidation (M)	DNA-directed RNA polymerase, mitochondrial OS=Mus musculus OX=10090 GN=Polrmt PE=1 SV=1
Q8VCE2	GPN1_MOUSE	15.05	4	4	26.6595	26.7645	26.6998	27.4629	41598	Acetylation (N-term);Oxidation (M)	GPN-loop GTPase 1 OS=Mus musculus OX=10090 GN=Gpn1 PE=1 SV=1
Q9QWV9	CCNT1_MOUSE	11.88	5	5	25.9225	25.1908	25.275	24.002	80598	Oxidation (M)	Cyclin-T1 OS=Mus musculus OX=10090 GN=Ccnt1 PE=1 SV=3
Q91V92	ACLY_MOUSE	40.33	35	35	30.362	30.8755	30.341	30.6713	119728	Oxidation (M)	ATP-citrate synthase OS=Mus musculus OX=10090 GN=Acly PE=1 SV=1
Q9CZW5	TOM70_MOUSE	20.95	9	9	28.459	28.55	28.1459	28.3578	67590	Oxidation (M)	Mitochondrial import receptor subunit TOM70 OS=Mus musculus OX=10090 GN=Tomm70 PE=1 SV=2
P59941	SIR6_MOUSE	11.68	2	2	21.6551	17.7661	22.9543	20.6038	36920	Oxidation (M)	NAD-dependent protein deacetylase sirtuin-6 OS=Mus musculus OX=10090 GN=Sirt6 PE=1 SV=1
P03893	NU2M_MOUSE	4.93	1	1	23.5983	24.4984	23.654	23.2821	38752	Oxidation (M)	NADH-ubiquinone oxidoreductase chain 2 OS=Mus musculus OX=10090 GN=Mtnd2 PE=1 SV=2
P08775	RPB1_MOUSE	25.79	34	34	27.7958	28.7988	27.5969	28.362	217176	Acetylation (N-term);Oxidation (M)	DNA-directed RNA polymerase II subunit RPB1 OS=Mus musculus OX=10090 GN=Polr2a PE=1 SV=3
P97480	EYA3_MOUSE	14.31	4	4	26.038	24.1488	25.3342	23.1536	55973		Eyes absent homolog 3 OS=Mus musculus OX=10090 GN=Eya3 PE=1 SV=2
P07903	ERCC1_MOUSE	13.42	2	2	24.2317	24.604	23.6971	24.0854	32910	Acetylation (N-term);Oxidation (M)	DNA excision repair protein ERCC-1 OS=Mus musculus OX=10090 GN=Ercc1 PE=2 SV=2
Q8CFE4	SCYL2_MOUSE	19.89	11	11	26.7129	27.0813	26.6458	26.9316	103317	Oxidation (M)	SCY1-like protein 2 OS=Mus musculus OX=10090 GN=Scyl2 PE=1 SV=1
Q8BFY7	PIMRE_MOUSE	12.99	3	3	24.2961	25.141	24.1565	24.9495	25686	Oxidation (M)	Protein PIMREG OS=Mus musculus OX=10090 GN=Pimreg PE=1 SV=1
Q8VCL2	SCO2_MOUSE	25.1	5	5	26.1234	26.6595	25.8069	26.7645	28944	Oxidation (M)	Protein SCO2 homolog, mitochondrial OS=Mus musculus OX=10090 GN=Sco2 PE=1 SV=1
Q811S7	UBIP1_MOUSE	11.48	4	4	24.9584	24.7543	25.6068	25.5075	60212	Oxidation (M)	Upstream-binding protein 1 OS=Mus musculus OX=10090 GN=Ubp1 PE=1 SV=1
Q3TH73	TTYH2_MOUSE	3.38	2	2	20.3718	20.3682	19.6689	20.1459	59008		Protein tweety homolog 2 OS=Mus musculus OX=10090 GN=Ttyh2 PE=1 SV=1
Q3UA16	SPC25_MOUSE	13.27	2	2	25.2133	24.7995	24.6649	24.8858	26457	Acetylation (N-term);Oxidation (M)	Kinetochore protein Spc25 OS=Mus musculus OX=10090 GN=Spc25 PE=2 SV=1
Q3UCV8	OTUL_MOUSE	3.12	1	1	25.2207	25.8264	24.4551	25.4138	40320		Ubiquitin thioesterase otulin OS=Mus musculus OX=10090 GN=Otulin PE=1 SV=1
Q9D1R2	KTI12_MOUSE	36.47	6	6	27.2625	26.9088	26.9977	26.7771	38445	Oxidation (M)	Protein KTI12 homolog OS=Mus musculus OX=10090 GN=Kti12 PE=1 SV=1
Q99JW2	ACY1_MOUSE	34.56	11	11	26.8504	27.8142	26.6458	30.2193	45781	Oxidation (M)	Aminoacylase-1 OS=Mus musculus OX=10090 GN=Acy1 PE=1 SV=1
Q9CQF6	ADPPT_MOUSE	3.88	1	1	23.9584	24.2535	23.3511	24.3307	35764	Oxidation (M)	L-aminoadipate-semialdehyde dehydrogenase-phosphopantetheinyl transferase OS=Mus musculus OX=10090 GN=Aasdhppt PE=1 SV=1
Q9CZR8	EFTS_MOUSE	24.69	4	4	27.509	27.7833	27.4862	27.5014	35334	Oxidation (M)	Elongation factor Ts, mitochondrial OS=Mus musculus OX=10090 GN=Tsfm PE=1 SV=1
Q9EPK2	XRP2_MOUSE	5.48	2	2	23.1926	22.3789	21.3429	22.9292	39377	Oxidation (M)	Protein XRP2 OS=Mus musculus OX=10090 GN=Rp2 PE=1 SV=3
P58069	RASA2_MOUSE	3.54	1	1	23.1898	24.1719	23.0965	24.1015	96401	Acetylation (N-term)	Ras GTPase-activating protein 2 OS=Mus musculus OX=10090 GN=Rasa2 PE=1 SV=2
O55229	CHKB_MOUSE	7.87	2	2	24.7389	24.2096	23.6096	25.0935	45126	Oxidation (M)	Choline/ethanolamine kinase OS=Mus musculus OX=10090 GN=Chkb PE=1 SV=3
Q99MK8	ARBK1_MOUSE	19.88	9	9	27.7771	28.6355	27.5682	27.9428	79639	Oxidation (M)	Beta-adrenergic receptor kinase 1 OS=Mus musculus OX=10090 GN=Grk2 PE=1 SV=2
P55096	ABCD3_MOUSE	21.85	9	9	27.5165	27.8081	27.6527	27.5463	75475	Oxidation (M)	ATP-binding cassette sub-family D member 3 OS=Mus musculus OX=10090 GN=Abcd3 PE=1 SV=2
Q3URD3	SLMAP_MOUSE	8.64	5	5	24.8717	24.8764	24.6811	24.6649	96933		Sarcolemmal membrane-associated protein OS=Mus musculus OX=10090 GN=Slmap PE=1 SV=2
Q9DC40	TELO2_MOUSE	11.79	6	6	25.0148	25.965	24.945	25.6838	93313		Telomere length regulation protein TEL2 homolog OS=Mus musculus OX=10090 GN=Telo2 PE=1 SV=2
Q6ZWX6	IF2A_MOUSE	60.32	18	18	30.7373	31.1177	30.2647	30.9746	36108	Oxidation (M)	Eukaryotic translation initiation factor 2 subunit 1 OS=Mus musculus OX=10090 GN=Eif2s1 PE=1 SV=3
Q63870	CO7A1_MOUSE	17.83	31	30	28.7958	29.5203	28.4823	28.8534	295232	Acetylation (N-term);NBF;Oxidation (M)	Collagen alpha-1(VII) chain OS=Mus musculus OX=10090 GN=Col7a1 PE=1 SV=3
O89112	LANC1_MOUSE	3.01	1	1	24.7745	25.4676	24.5105	25.4738	45341		Glutathione S-transferase LANCL1 OS=Mus musculus OX=10090 GN=Lancl1 PE=1 SV=1
P62814	VATB2_MOUSE	53.82	17	17	28.3153	28.7864	27.7895	28.391	56551	Acetylation (N-term);Oxidation (M)	V-type proton ATPase subunit B, brain isoform OS=Mus musculus OX=10090 GN=Atp6v1b2 PE=1 SV=1
Q99KY4	GAK_MOUSE	18.31	16	16	26.8974	27.5536	27.2979	27.9031	143641	Oxidation (M)	Cyclin-G-associated kinase OS=Mus musculus OX=10090 GN=Gak PE=1 SV=2
O54998	FKBP7_MOUSE	6.88	1	1	21.4795	NaN	21.7773	18.413	24913		Peptidyl-prolyl cis-trans isomerase FKBP7 OS=Mus musculus OX=10090 GN=Fkbp7 PE=1 SV=1
Q61543	GSLG1_MOUSE	6.13	6	6	28.6865	29.3239	28.0965	29.0583	133734	Oxidation (M)	Golgi apparatus protein 1 OS=Mus musculus OX=10090 GN=Glg1 PE=1 SV=1
Q9DBS1	TMM43_MOUSE	54.5	15	15	29.5071	29.4334	29.4154	29.5772	44783	Oxidation (M)	Transmembrane protein 43 OS=Mus musculus OX=10090 GN=Tmem43 PE=1 SV=1
Q9D6T0	NOSIP_MOUSE	19.27	4	4	25.9539	26.2821	25.6012	25.9203	33209	Oxidation (M)	Nitric oxide synthase-interacting protein OS=Mus musculus OX=10090 GN=Nosip PE=1 SV=1
P31324	KAP3_MOUSE	29.57	9	7	26.8019	26.8623	27.2714	26.6458	46167	Oxidation (M)	cAMP-dependent protein kinase type II-beta regulatory subunit OS=Mus musculus OX=10090 GN=Prkar2b PE=1 SV=3
Q8VEE4	RFA1_MOUSE	27.13	13	13	28.6898	27.8081	27.9146	28.4354	69037	Oxidation (M)	Replication protein A 70 kDa DNA-binding subunit OS=Mus musculus OX=10090 GN=Rpa1 PE=1 SV=1
Q8BY02	NKRF_MOUSE	8.26	4	4	24.7234	24.7995	23.7077	24.3975	77739		NF-kappa-B-repressing factor OS=Mus musculus OX=10090 GN=Nkrf PE=2 SV=3
O54692	ZW10_MOUSE	23.23	12	12	27.4154	27.1984	26.9869	27.2077	88063	Acetylation (N-term);Oxidation (M)	Centromere/kinetochore protein zw10 homolog OS=Mus musculus OX=10090 GN=Zw10 PE=1 SV=3
Q5NCX5	NEUL4_MOUSE	1.15	1	1	18.3355	NaN	19.1593	19.3371	167637		Neuralized-like protein 4 OS=Mus musculus OX=10090 GN=Neurl4 PE=1 SV=1
Q4VBE8	WDR18_MOUSE	18.79	6	6	27.8203	28.0349	27.019	27.7771	47211		WD repeat-containing protein 18 OS=Mus musculus OX=10090 GN=Wdr18 PE=1 SV=1
S4R1M9	OSB10_MOUSE	3.66	2	1	NaN	21.1207	19.8286	17.6531	83856	Acetylation (N-term)	Oxysterol-binding protein-related protein 10 OS=Mus musculus OX=10090 GN=Osbpl10 PE=1 SV=1
Q9CYZ2	TPD54_MOUSE	40	7	7	28.7421	28.9595	28.0505	28.5933	24043	Acetylation (N-term);Oxidation (M)	Tumor protein D54 OS=Mus musculus OX=10090 GN=Tpd52l2 PE=1 SV=1
Q7TMF3	NDUAC_MOUSE	25.52	3	3	26.3066	26.726	26.2002	26.5135	17086	Acetylation (N-term);Oxidation (M)	NADH dehydrogenase [ubiquinone] 1 alpha subcomplex subunit 12 OS=Mus musculus OX=10090 GN=Ndufa12 PE=1 SV=2
P53702	CCHL_MOUSE	18.38	4	4	25.918	26.6458	26.2643	26.317	30978	Oxidation (M)	Holocytochrome c-type synthase OS=Mus musculus OX=10090 GN=Hccs PE=1 SV=2
Q9DAT2	MRGBP_MOUSE	13.73	2	2	24.5105	24.9406	24.4298	24.7695	22436		MRG/MORF4L-binding protein OS=Mus musculus OX=10090 GN=Mrgbp PE=1 SV=2
Q8K354	CBR3_MOUSE	15.16	2	2	24.5522	24.2821	24.6096	24.5869	30953		Carbonyl reductase [NADPH] 3 OS=Mus musculus OX=10090 GN=Cbr3 PE=1 SV=1
Q3U962	CO5A2_MOUSE	59.32	62	59	30.2422	30.2759	30.0217	29.6612	145018	Acetylation (N-term);NBF;Oxidation (M)	Collagen alpha-2(V) chain OS=Mus musculus OX=10090 GN=Col5a2 PE=1 SV=1
O70305	ATX2_MOUSE	16.89	14	14	28.6389	28.4274	27.6389	28.1065	136485	Acetylation (N-term);Oxidation (M)	Ataxin-2 OS=Mus musculus OX=10090 GN=Atxn2 PE=1 SV=1
Q8K2I1	FNTB_MOUSE	5.26	2	2	25.7645	25.275	24.9628	24.6375	48820		Protein farnesyltransferase subunit beta OS=Mus musculus OX=10090 GN=Fntb PE=1 SV=1
Q8BVI5	STX16_MOUSE	12.58	3	3	22.6865	21.1339	22.3219	21.9059	37080	Oxidation (M)	Syntaxin-16 OS=Mus musculus OX=10090 GN=Stx16 PE=1 SV=3
P20664	PRI1_MOUSE	28.78	9	9	27.2445	26.7129	26.5754	26.7389	49295	Acetylation (N-term);Oxidation (M)	DNA primase small subunit OS=Mus musculus OX=10090 GN=Prim1 PE=1 SV=1
Q61666	HIRA_MOUSE	4.14	3	3	23.4041	22.9683	23.5983	23.0175	111767		Protein HIRA OS=Mus musculus OX=10090 GN=Hira PE=1 SV=3
Q8VDM1	ZGPAT_MOUSE	11.15	4	4	23.7286	23.9134	23.7182	23.632	56411	Acetylation (N-term);Oxidation (M)	Zinc finger CCCH-type with G patch domain-containing protein OS=Mus musculus OX=10090 GN=Zgpat PE=1 SV=1
P70297	STAM1_MOUSE	27.37	9	8	26.4999	25.4645	26.726	24.9134	59771	Oxidation (M)	Signal transducing adapter molecule 1 OS=Mus musculus OX=10090 GN=Stam PE=1 SV=3
Q91YP2	NEUL_MOUSE	26.56	13	13	27.8974	28.0965	27.524	27.9031	80429	Oxidation (M)	Neurolysin, mitochondrial OS=Mus musculus OX=10090 GN=Nln PE=1 SV=1
Q8BTX9	HSDL1_MOUSE	21.82	5	5	23.9495	25.1214	24.3031	24.9134	36868	Acetylation (N-term)	Inactive hydroxysteroid dehydrogenase-like protein 1 OS=Mus musculus OX=10090 GN=Hsdl1 PE=1 SV=1
Q8R4U7	LUZP1_MOUSE	27.62	23	23	28.2625	27.6595	27.2445	27.8203	119311	Acetylation (N-term);NBF;Oxidation (M)	Leucine zipper protein 1 OS=Mus musculus OX=10090 GN=Luzp1 PE=1 SV=2
Q6NVE8	WDR44_MOUSE	13.22	7	7	24.7543	24.7441	24.1642	24.5983	101555	Acetylation (N-term)	WD repeat-containing protein 44 OS=Mus musculus OX=10090 GN=Wdr44 PE=1 SV=1
Q91Z83	MYH7_MOUSE	3.67	10	5	22.6741	22.9023	23.1365	23.0895	222879	Oxidation (M)	Myosin-7 OS=Mus musculus OX=10090 GN=Myh7 PE=2 SV=1
P09528	FRIH_MOUSE	12.64	2	2	24.0443	23.4041	23.7895	22.9069	21067		Ferritin heavy chain OS=Mus musculus OX=10090 GN=Fth1 PE=1 SV=2
Q9JHI2	ADAT1_MOUSE	3.21	1	1	21.7852	NaN	21.5017	20.9791	55355		tRNA-specific adenosine deaminase 1 OS=Mus musculus OX=10090 GN=Adat1 PE=1 SV=1
Q3V038	TTC9A_MOUSE	6.39	1	1	23.7796	24.7182	23.3101	24.48	24351		Tetratricopeptide repeat protein 9A OS=Mus musculus OX=10090 GN=Ttc9 PE=1 SV=1
Q921K9	BCL7B_MOUSE	28.22	3	2	24.3645	24.1015	24.3376	23.9672	22238		B-cell CLL/lymphoma 7 protein family member B OS=Mus musculus OX=10090 GN=Bcl7b PE=1 SV=1
Q9D7X3	DUS3_MOUSE	37.3	5	5	26.632	26.2225	26.673	25.8599	20472	Oxidation (M)	Dual specificity protein phosphatase 3 OS=Mus musculus OX=10090 GN=Dusp3 PE=1 SV=1
Q6PDY2	AEDO_MOUSE	29.69	4	4	26.8623	27.604	26.5898	27.0914	28372		2-aminoethanethiol dioxygenase OS=Mus musculus OX=10090 GN=Ado PE=1 SV=2
Q91W98	S15A4_MOUSE	2.44	1	1	18.2776	21.4199	20.949	21.3591	62256		Solute carrier family 15 member 4 OS=Mus musculus OX=10090 GN=Slc15a4 PE=1 SV=1
B7ZMP1	XPP3_MOUSE	3.36	1	1	23.3645	22.595	22.8925	23.7695	56677		Xaa-Pro aminopeptidase 3 OS=Mus musculus OX=10090 GN=Xpnpep3 PE=1 SV=1
P58043	SESN2_MOUSE	2.71	1	1	21.195	21.8782	21.7454	22.113	54377		Sestrin-2 OS=Mus musculus OX=10090 GN=Sesn2 PE=1 SV=1
Q3UR97	SNX21_MOUSE	4.41	1	1	NaN	20.2801	20.4996	20.6117	40308		Sorting nexin-21 OS=Mus musculus OX=10090 GN=Snx21 PE=1 SV=1
Q9JHU4	DYHC1_MOUSE	45.82	175	175	30.4727	31.015	29.8916	30.1842	532045	Acetylation (N-term);NBF;Oxidation (M)	Cytoplasmic dynein 1 heavy chain 1 OS=Mus musculus OX=10090 GN=Dync1h1 PE=1 SV=2
Q9EPC1	PARVA_MOUSE	21.77	7	6	28.8019	28.3494	28.4113	28.4314	42330		Alpha-parvin OS=Mus musculus OX=10090 GN=Parva PE=1 SV=1
Q9JIX8	ACINU_MOUSE	28.1	27	27	29.1065	28.7486	28.2216	28.141	150719	Oxidation (M)	Apoptotic chromatin condensation inducer in the nucleus OS=Mus musculus OX=10090 GN=Acin1 PE=1 SV=3
Q3TMW1	C102A_MOUSE	25.14	7	7	26.7645	27.0914	26.4629	27.141	62624	Oxidation (M)	Coiled-coil domain-containing protein 102A OS=Mus musculus OX=10090 GN=Ccdc102a PE=1 SV=2
Q9D5V6	SYAP1_MOUSE	33.7	6	6	26.2077	24.1332	25.417	24.317	41350	Acetylation (N-term);Oxidation (M)	Synapse-associated protein 1 OS=Mus musculus OX=10090 GN=Syap1 PE=1 SV=1
Q9D0I8	MRT4_MOUSE	27.62	6	6	28.7676	28.604	28.1459	28.7517	27546	Oxidation (M)	mRNA turnover protein 4 homolog OS=Mus musculus OX=10090 GN=Mrto4 PE=1 SV=1
Q64449	MRC2_MOUSE	10.62	9	9	25.848	27.1507	26.7771	27.3662	167074	Acetylation (N-term);Oxidation (M)	C-type mannose receptor 2 OS=Mus musculus OX=10090 GN=Mrc2 PE=1 SV=3
E9Q5F9	SETD2_MOUSE	5.01	9	9	23.48	22.7098	23.2679	22.6096	285663	Oxidation (M)	Histone-lysine N-methyltransferase SETD2 OS=Mus musculus OX=10090 GN=Setd2 PE=1 SV=1
Q8CHK3	MBOA7_MOUSE	3.38	1	1	24.7594	NaN	23.867	19.9534	53436		Lysophospholipid acyltransferase 7 OS=Mus musculus OX=10090 GN=Mboat7 PE=1 SV=1
Q8R2E9	ERO1B_MOUSE	3.21	1	1	20.8092	20.7598	20.8507	NaN	53518		ERO1-like protein beta OS=Mus musculus OX=10090 GN=Ero1b PE=1 SV=1
P56135	ATPK_MOUSE	13.64	1	1	29.0914	29.6527	28.7613	29.8638	10344		ATP synthase subunit f, mitochondrial OS=Mus musculus OX=10090 GN=Atp5mf PE=1 SV=3
Q8K2V6	IPO11_MOUSE	19.08	11	11	26.5507	27.2353	26.2979	26.8741	112416	Acetylation (N-term);Oxidation (M)	Importin-11 OS=Mus musculus OX=10090 GN=Ipo11 PE=1 SV=1
Q99M01	SYFM_MOUSE	2.88	1	1	22.884	23.867	22.0237	23.4041	52337		Phenylalanine--tRNA ligase, mitochondrial OS=Mus musculus OX=10090 GN=Fars2 PE=1 SV=1
Q8K4Z3	NNRE_MOUSE	10.64	2	2	25.965	25.4892	26.5195	25.7312	30973		NAD(P)H-hydrate epimerase OS=Mus musculus OX=10090 GN=Naxe PE=1 SV=1
Q99J47	DRS7B_MOUSE	28.17	6	6	26.976	28.6764	28.003	28.8294	34987	Oxidation (M)	Dehydrogenase/reductase SDR family member 7B OS=Mus musculus OX=10090 GN=Dhrs7b PE=1 SV=1
Q9Z0V8	TI17A_MOUSE	32.16	3	3	25.7771	25.6865	25.918	26.1585	18112		Mitochondrial import inner membrane translocase subunit Tim17-A OS=Mus musculus OX=10090 GN=Timm17a PE=1 SV=1
Q8R1F1	NIBA2_MOUSE	34.85	17	17	29.5646	29.7031	29.1676	29.5426	84819	Oxidation (M)	Protein Niban 2 OS=Mus musculus OX=10090 GN=Niban2 PE=1 SV=2
P48758	CBR1_MOUSE	33.94	6	6	27.1984	27.5969	26.9088	27.1015	30641	Oxidation (M)	Carbonyl reductase [NADPH] 1 OS=Mus musculus OX=10090 GN=Cbr1 PE=1 SV=3
Q6NZB0	DNJC8_MOUSE	35.18	6	6	28.8203	28.7096	28.391	28.6798	29813	Acetylation (N-term);Oxidation (M)	DnaJ homolog subfamily C member 8 OS=Mus musculus OX=10090 GN=Dnajc8 PE=1 SV=2
O08550	KMT2B_MOUSE	0.7	1	1	20.5293	23.1627	21.4186	21.6034	294821		Histone-lysine N-methyltransferase 2B OS=Mus musculus OX=10090 GN=Kmt2b PE=1 SV=3
Q9DCS3	MECR_MOUSE	41.55	7	7	26.9977	27.0914	26.5898	26.7389	40343	Acetylation (N-term);NBF;Oxidation (M)	Enoyl-[acyl-carrier-protein] reductase, mitochondrial OS=Mus musculus OX=10090 GN=Mecr PE=1 SV=2
Q9CPY7	AMPL_MOUSE	45.86	17	17	29.7755	29.4134	29.4532	29.3452	56141	Oxidation (M)	Cytosol aminopeptidase OS=Mus musculus OX=10090 GN=Lap3 PE=1 SV=3
C0HKE3	H2A1D_MOUSE	28.46	9	3	27.4551	29.6407	26.8264	28.9512	14135	NBF	Histone H2A type 1-D OS=Mus musculus OX=10090 GN=H2ac7 PE=1 SV=1
Q8K072	REEP4_MOUSE	8.56	1	1	25.4892	25.8312	25.6264	26.0084	29691		Receptor expression-enhancing protein 4 OS=Mus musculus OX=10090 GN=Reep4 PE=1 SV=1
Q9DB42	ZN593_MOUSE	17.91	3	3	25.3444	25.6971	24.3844	25.5315	15147		Zinc finger protein 593 OS=Mus musculus OX=10090 GN=Znf593 PE=1 SV=2
Q8R3F9	STPAP_MOUSE	14.5	8	8	25.7945	26.3975	25.6348	26.632	94603	Acetylation (N-term);Oxidation (M)	Speckle targeted PIP5K1A-regulated poly(A) polymerase OS=Mus musculus OX=10090 GN=Tut1 PE=1 SV=1
Q9Z172	SUMO3_MOUSE	8.18	2	1	19.0603	20.8212	19.4325	20.6462	12430		Small ubiquitin-related modifier 3 OS=Mus musculus OX=10090 GN=Sumo3 PE=1 SV=1
Q78JE5	FBX22_MOUSE	15.42	5	5	25.0105	26.1965	25.5725	25.6811	44203	Acetylation (N-term);Oxidation (M)	F-box only protein 22 OS=Mus musculus OX=10090 GN=Fbxo22 PE=1 SV=2
Q3THE2	ML12B_MOUSE	30.23	9	4	32.0895	32.0927	31.4919	31.9539	19779	Oxidation (M)	Myosin regulatory light chain 12B OS=Mus musculus OX=10090 GN=Myl12b PE=1 SV=2
O88396	GRPE2_MOUSE	4.91	1	1	22.7082	21.3136	21.8209	21.6782	25030		GrpE protein homolog 2, mitochondrial OS=Mus musculus OX=10090 GN=Grpel2 PE=2 SV=2
Q8BHS6	ARMX3_MOUSE	21.11	6	6	25.317	25.3545	25.1488	25.3511	42620	Oxidation (M)	Armadillo repeat-containing X-linked protein 3 OS=Mus musculus OX=10090 GN=Armcx3 PE=1 SV=1
A2AQ07	TBB1_MOUSE	4.43	6	1	NaN	21.9308	20.5716	22.9653	50441	Oxidation (M)	Tubulin beta-1 chain OS=Mus musculus OX=10090 GN=Tubb1 PE=1 SV=1
Q6PFX9	TNKS1_MOUSE	2.12	2	2	23.5754	23.3778	23.0315	23.0041	140944		Poly [ADP-ribose] polymerase tankyrase-1 OS=Mus musculus OX=10090 GN=Tnks PE=1 SV=1
D3YXK2	SAFB1_MOUSE	19.64	15	12	29.2123	28.9117	28.9787	28.6595	105104	Acetylation (N-term);Oxidation (M)	Scaffold attachment factor B1 OS=Mus musculus OX=10090 GN=Safb PE=1 SV=2
Q9JLT4	TRXR2_MOUSE	5.15	3	2	23.5165	25.5638	23.4425	25.4676	56572		Thioredoxin reductase 2, mitochondrial OS=Mus musculus OX=10090 GN=Txnrd2 PE=1 SV=4
Q91WK1	SPRY4_MOUSE	22.22	3	3	24.5522	25.7995	25.4041	25.317	23275		SPRY domain-containing protein 4 OS=Mus musculus OX=10090 GN=Spryd4 PE=1 SV=1
O35343	IMA3_MOUSE	24.57	8	6	28.7129	29.3641	27.9146	29.1795	57923	Oxidation (M)	Importin subunit alpha-3 OS=Mus musculus OX=10090 GN=Kpna4 PE=1 SV=1
P24547	IMDH2_MOUSE	41.83	19	19	31.0673	30.8081	30.7373	31.1544	55815	NBF;Oxidation (M)	Inosine-5'-monophosphate dehydrogenase 2 OS=Mus musculus OX=10090 GN=Impdh2 PE=1 SV=2
Q7TMF2	ERI1_MOUSE	4.93	1	1	23.5404	22.7093	22.8458	22.6782	39493	Oxidation (M)	3'-5' exoribonuclease 1 OS=Mus musculus OX=10090 GN=Eri1 PE=1 SV=2
Q9CWW6	PIN4_MOUSE	17.56	2	2	27.7708	27.4234	27.2714	27.3828	13815	Oxidation (M)	Peptidyl-prolyl cis-trans isomerase NIMA-interacting 4 OS=Mus musculus OX=10090 GN=Pin4 PE=1 SV=1
P15208	INSR_MOUSE	1.53	1	1	20.8807	19.0939	18.4991	19.196	155610	Oxidation (M)	Insulin receptor OS=Mus musculus OX=10090 GN=Insr PE=1 SV=2
Q5ND34	WDR81_MOUSE	5.48	5	5	23.417	22.7842	23.6757	23.7286	211945	Oxidation (M)	WD repeat-containing protein 81 OS=Mus musculus OX=10090 GN=Wdr81 PE=1 SV=2
Q80UX8	ABHDD_MOUSE	5.04	1	1	21.948	21.9264	22.6884	21.5173	38525		Protein ABHD13 OS=Mus musculus OX=10090 GN=Abhd13 PE=2 SV=1
Q6ZWY3	RS27L_MOUSE	14.29	3	2	29.6798	29.651	28.7739	29.3023	9477		40S ribosomal protein S27-like OS=Mus musculus OX=10090 GN=Rps27l PE=1 SV=3
P57776	EF1D_MOUSE	49.82	12	11	32.4895	32.9028	32.1901	32.6415	31293	Acetylation (N-term);Oxidation (M)	Elongation factor 1-delta OS=Mus musculus OX=10090 GN=Eef1d PE=1 SV=3
Q62383	SPT6H_MOUSE	27.29	32	32	29.114	28.0349	27.4234	26.7517	199086	Oxidation (M)	Transcription elongation factor SPT6 OS=Mus musculus OX=10090 GN=Supt6h PE=1 SV=2
Q99MR8	MCCA_MOUSE	18.83	7	7	24.8623	24.8623	25.141	24.7645	79344	Oxidation (M)	Methylcrotonoyl-CoA carboxylase subunit alpha, mitochondrial OS=Mus musculus OX=10090 GN=Mccc1 PE=1 SV=2
Q9DCD2	SYF1_MOUSE	32.98	20	20	28.877	28.7833	27.2803	28.2891	99988	Oxidation (M)	Pre-mRNA-splicing factor SYF1 OS=Mus musculus OX=10090 GN=Xab2 PE=1 SV=1
O88428	PAPS2_MOUSE	18.2	10	9	25.3545	26.0995	25.8504	26.604	70351	Oxidation (M)	Bifunctional 3'-phosphoadenosine 5'-phosphosulfate synthase 2 OS=Mus musculus OX=10090 GN=Papss2 PE=1 SV=2
Q8CIG8	ANM5_MOUSE	32.34	13	13	29.6663	29.3971	28.4234	29.3109	72680	Oxidation (M)	Protein arginine N-methyltransferase 5 OS=Mus musculus OX=10090 GN=Prmt5 PE=1 SV=3
Q8BJL1	FBX30_MOUSE	4.29	2	2	25.5638	26.7771	24.9933	25.8457	82687	Oxidation (M)	F-box only protein 30 OS=Mus musculus OX=10090 GN=Fbxo30 PE=1 SV=2
Q8BP71	RFOX2_MOUSE	50.11	11	11	28.0296	28.459	28.0711	28.189	47330	Acetylation (N-term);NBF;Oxidation (M)	RNA binding protein fox-1 homolog 2 OS=Mus musculus OX=10090 GN=Rbfox2 PE=1 SV=2
P83917	CBX1_MOUSE	27.57	7	6	24.0609	23.5165	22.2259	22.8752	21418		Chromobox protein homolog 1 OS=Mus musculus OX=10090 GN=Cbx1 PE=1 SV=1
A2AH22	AMRA1_MOUSE	5	4	4	23.0662	23.8191	23.0584	23.7389	142879	Oxidation (M)	Activating molecule in BECN1-regulated autophagy protein 1 OS=Mus musculus OX=10090 GN=Ambra1 PE=1 SV=1
Q99L47	F10A1_MOUSE	16.71	6	6	30.7453	30.5844	30.4433	30.3515	41656	Oxidation (M)	Hsc70-interacting protein OS=Mus musculus OX=10090 GN=St13 PE=1 SV=1
B1AVH7	TBD2A_MOUSE	1.63	1	1	21.4455	22.5838	21.6835	22.7936	104260		TBC1 domain family member 2A OS=Mus musculus OX=10090 GN=Tbc1d2 PE=2 SV=1
Q80W54	FACE1_MOUSE	14.11	5	5	29.3992	29.726	28.7581	29.6216	54735	Oxidation (M)	CAAX prenyl protease 1 homolog OS=Mus musculus OX=10090 GN=Zmpste24 PE=1 SV=2
O35188	X3CL1_MOUSE	2.78	1	1	15.8869	19.3908	16.581	18.8714	42099		Fractalkine OS=Mus musculus OX=10090 GN=Cx3cl1 PE=1 SV=3
Q8R5A3	AB1IP_MOUSE	9.55	3	3	24.3844	24.0691	25.1908	27.1115	74319	Oxidation (M)	Amyloid beta A4 precursor protein-binding family B member 1-interacting protein OS=Mus musculus OX=10090 GN=Apbb1ip PE=1 SV=2
P26039	TLN1_MOUSE	42.23	85	75	31.8534	32.2336	31.6544	34.5121	269821	Acetylation (N-term);NBF;Oxidation (M)	Talin-1 OS=Mus musculus OX=10090 GN=Tln1 PE=1 SV=2
Q04899	CDK18_MOUSE	12.42	3	3	22.2704	22.687	23.215	22.806	51848	Oxidation (M)	Cyclin-dependent kinase 18 OS=Mus musculus OX=10090 GN=Cdk18 PE=1 SV=1
P06745	G6PI_MOUSE	47.31	19	19	31.362	31.015	29.6865	30.0084	62767	NBF;Oxidation (M)	Glucose-6-phosphate isomerase OS=Mus musculus OX=10090 GN=Gpi PE=1 SV=4
Q8CI32	BAG5_MOUSE	13.42	4	4	24.3975	23.7594	24.8336	22.9502	50943	Acetylation (N-term);Oxidation (M)	BAG family molecular chaperone regulator 5 OS=Mus musculus OX=10090 GN=Bag5 PE=1 SV=1
Q60865	CAPR1_MOUSE	29.84	10	10	31.4483	31.0609	31.0864	30.846	78169	Oxidation (M)	Caprin-1 OS=Mus musculus OX=10090 GN=Caprin1 PE=1 SV=2
Q6P9Q6	FKB15_MOUSE	21.63	15	15	25.1681	26.1332	24.9043	25.4457	132961	Acetylation (N-term);Oxidation (M)	FK506-binding protein 15 OS=Mus musculus OX=10090 GN=Fkbp15 PE=1 SV=2
Q69ZR2	HECD1_MOUSE	20.59	31	31	28.0864	28.94	27.6798	28.5754	290086	Acetylation (N-term);Oxidation (M)	E3 ubiquitin-protein ligase HECTD1 OS=Mus musculus OX=10090 GN=Hectd1 PE=1 SV=2
Q62176	RBM38_MOUSE	15.19	2	2	23.1859	22.7686	23.8385	24.6153	25364		RNA-binding protein 38 OS=Mus musculus OX=10090 GN=Rbm38 PE=1 SV=2
Q8BGG6	MSPD3_MOUSE	9.36	1	1	18.0728	20.7661	21.0079	22.0124	25433		Motile sperm domain-containing protein 3 OS=Mus musculus OX=10090 GN=Mospd3 PE=2 SV=1
Q3UVK0	ERMP1_MOUSE	13.92	9	9	27.0609	27.3745	26.4089	27.0813	100148	Oxidation (M)	Endoplasmic reticulum metallopeptidase 1 OS=Mus musculus OX=10090 GN=Ermp1 PE=1 SV=2
B9EJ80	PDZD8_MOUSE	11.25	7	7	28.2262	27.604	27.9705	26.5898	127739	Oxidation (M)	PDZ domain-containing protein 8 OS=Mus musculus OX=10090 GN=Pdzd8 PE=1 SV=1
Q9DC51	GNAI3_MOUSE	11.3	7	3	28.5315	29.3044	28.3536	28.8534	40538		Guanine nucleotide-binding protein G(i) subunit alpha-3 OS=Mus musculus OX=10090 GN=Gnai3 PE=1 SV=3
Q8BIW1	PRUN1_MOUSE	31.94	10	10	27.2535	27.611	26.3222	27.5463	50239	Oxidation (M)	Exopolyphosphatase PRUNE1 OS=Mus musculus OX=10090 GN=Prune1 PE=1 SV=1
Q8R3F5	FABD_MOUSE	10.5	3	3	25.2607	25.9562	25.3877	26.0275	41928		Malonyl-CoA-acyl carrier protein transacylase, mitochondrial OS=Mus musculus OX=10090 GN=Mcat PE=1 SV=3
Q8BH48	UBAP1_MOUSE	12.35	3	3	23.4676	23.1194	24.1174	23.3778	55028	Oxidation (M)	Ubiquitin-associated protein 1 OS=Mus musculus OX=10090 GN=Ubap1 PE=1 SV=1
O54791	MAFF_MOUSE	23.08	2	2	23.632	23.8764	24.1719	22.7646	16955	Oxidation (M)	Transcription factor MafF OS=Mus musculus OX=10090 GN=Maff PE=2 SV=1
Q9CZY2	TCAL8_MOUSE	22.22	1	1	19.5247	20.138	19.5535	20.0099	13472		Transcription elongation factor A protein-like 8 OS=Mus musculus OX=10090 GN=Tceal8 PE=3 SV=1
Q9D281	NXP20_MOUSE	41.48	14	14	26.976	26.8264	26.6998	27.1604	61013	Oxidation (M)	Protein Noxp20 OS=Mus musculus OX=10090 GN=Fam114a1 PE=1 SV=1
O88466	ZN106_MOUSE	2.07	2	2	20.6409	20.8301	NaN	21.7586	208964		Zinc finger protein 106 OS=Mus musculus OX=10090 GN=Znf106 PE=1 SV=3
Q8BMA6	SRP68_MOUSE	26.24	14	14	28.7549	28.6492	28.5862	28.7802	70574	Acetylation (N-term);Oxidation (M)	Signal recognition particle subunit SRP68 OS=Mus musculus OX=10090 GN=Srp68 PE=1 SV=2
Q6P1B1	XPP1_MOUSE	31.94	13	13	28.1604	27.8974	28.0914	27.7517	69591	Oxidation (M)	Xaa-Pro aminopeptidase 1 OS=Mus musculus OX=10090 GN=Xpnpep1 PE=1 SV=1
P16330	CN37_MOUSE	5.95	2	2	20.848	20.5388	20.5478	19.6208	47123		2',3'-cyclic-nucleotide 3'-phosphodiesterase OS=Mus musculus OX=10090 GN=Cnp PE=1 SV=3
P58044	IDI1_MOUSE	44.05	8	8	28.9287	27.9088	28.4194	27.6527	26289	Oxidation (M)	Isopentenyl-diphosphate Delta-isomerase 1 OS=Mus musculus OX=10090 GN=Idi1 PE=1 SV=1
Q8BHN3	GANAB_MOUSE	47.35	31	31	30.2535	30.8004	30.3196	30.8682	106911	Oxidation (M)	Neutral alpha-glucosidase AB OS=Mus musculus OX=10090 GN=Ganab PE=1 SV=1
Q811I0	ATPF1_MOUSE	10.8	2	2	23.2463	19.8964	23.0217	21.7882	36354	Oxidation (M)	ATP synthase mitochondrial F1 complex assembly factor 1 OS=Mus musculus OX=10090 GN=Atpaf1 PE=1 SV=1
Q80WR5	CA174_MOUSE	25.22	3	3	23.48	23.976	23.1773	23.6096	24774		UPF0688 protein C1orf174 homolog OS=Mus musculus OX=10090 PE=1 SV=1
O70503	DHB12_MOUSE	23.4	5	5	27.5315	28.7031	28.4707	27.965	34742	Oxidation (M)	Very-long-chain 3-oxoacyl-CoA reductase OS=Mus musculus OX=10090 GN=Hsd17b12 PE=1 SV=1
P60330	ESPL1_MOUSE	5.76	8	8	24.1795	23.6971	23.1529	24.1795	233035		Separin OS=Mus musculus OX=10090 GN=Espl1 PE=1 SV=1
A2A7S8	K1522_MOUSE	12.54	7	7	23.7389	24.0275	23.8858	24.1332	104842	Oxidation (M)	Uncharacterized protein KIAA1522 OS=Mus musculus OX=10090 GN=Kiaa1522 PE=1 SV=1
Q9D7S7	RL22L_MOUSE	39.34	3	3	29.3766	29.8697	29.55	30.362	14467		60S ribosomal protein L22-like 1 OS=Mus musculus OX=10090 GN=Rpl22l1 PE=1 SV=1
P36552	HEM6_MOUSE	20.99	7	7	26.4073	26.417	26.0732	26.6458	49715	Oxidation (M)	Oxygen-dependent coproporphyrinogen-III oxidase, mitochondrial OS=Mus musculus OX=10090 GN=Cpox PE=1 SV=2
Q9D824	FIP1_MOUSE	37.52	12	12	27.7195	28.4194	27.4073	28.1065	64959	Oxidation (M)	Pre-mRNA 3'-end-processing factor FIP1 OS=Mus musculus OX=10090 GN=Fip1l1 PE=1 SV=1
O35730	RING1_MOUSE	5.67	2	1	22.6984	20.8872	22.8088	21.6076	42631		E3 ubiquitin-protein ligase RING1 OS=Mus musculus OX=10090 GN=Ring1 PE=1 SV=2
Q91YL2	RN126_MOUSE	3.19	1	1	22.59	22.7018	21.2721	21.4881	34081		E3 ubiquitin-protein ligase RNF126 OS=Mus musculus OX=10090 GN=Rnf126 PE=1 SV=1
Q571I9	A16A1_MOUSE	9.1	5	5	26.0296	26.8974	26.038	26.5195	84756	Oxidation (M)	Aldehyde dehydrogenase family 16 member A1 OS=Mus musculus OX=10090 GN=Aldh16a1 PE=1 SV=2
Q9D968	HCFC2_MOUSE	1.39	1	1	21.4474	23.0925	21.9958	22.7387	79435		Host cell factor 2 OS=Mus musculus OX=10090 GN=Hcfc2 PE=1 SV=2
O70279	ESS2_MOUSE	23.59	9	9	25.8312	26.1776	25.5075	26.0212	52604	Acetylation (N-term);NBF	Splicing factor ESS-2 homolog OS=Mus musculus OX=10090 GN=Ess2 PE=1 SV=2
Q9CYI4	LUC7L_MOUSE	13.48	6	4	27.2625	27.8974	26.7771	27.8203	43934	Oxidation (M)	Putative RNA-binding protein Luc7-like 1 OS=Mus musculus OX=10090 GN=Luc7l PE=1 SV=2
Q7TNC4	LC7L2_MOUSE	12.76	6	4	29.3848	30.1361	28.94	29.9539	46583	Oxidation (M)	Putative RNA-binding protein Luc7-like 2 OS=Mus musculus OX=10090 GN=Luc7l2 PE=1 SV=1
Q9ER38	TOR3A_MOUSE	13.25	2	2	23.7895	23.4298	23.7492	23.6865	43814	Oxidation (M)	Torsin-3A OS=Mus musculus OX=10090 GN=Tor3a PE=1 SV=2
Q8VEJ9	VPS4A_MOUSE	2.52	3	1	25.3545	26.0484	25.3273	26.0062	48907		Vacuolar protein sorting-associated protein 4A OS=Mus musculus OX=10090 GN=Vps4a PE=1 SV=1
P62996	TRA2B_MOUSE	10.42	2	2	29.5463	32.1361	29.5862	30.0217	33666		Transformer-2 protein homolog beta OS=Mus musculus OX=10090 GN=Tra2b PE=1 SV=1
Q921E6	EED_MOUSE	16.78	6	6	25.7492	25.6153	25.239	25.3031	50198	Oxidation (M)	Polycomb protein EED OS=Mus musculus OX=10090 GN=Eed PE=1 SV=1
Q80W37	SPN1_MOUSE	10.34	2	2	24.4551	25.239	24.7024	25.0935	41032	Acetylation (N-term);Oxidation (M)	Snurportin-1 OS=Mus musculus OX=10090 GN=Snupn PE=2 SV=1
P62254	UB2G1_MOUSE	17.06	2	2	24.989	25.3342	25.141	25.0484	19509	Acetylation (N-term);Oxidation (M)	Ubiquitin-conjugating enzyme E2 G1 OS=Mus musculus OX=10090 GN=Ube2g1 PE=1 SV=3
Q9CRT8	XPOT_MOUSE	21.39	14	14	28.003	28.6629	27.6931	28.6831	109734	Acetylation (N-term);Oxidation (M)	Exportin-T OS=Mus musculus OX=10090 GN=Xpot PE=1 SV=3
Q99JP6	HOME3_MOUSE	13.48	3	3	22.1362	21.4043	22.2833	23.5404	39694		Homer protein homolog 3 OS=Mus musculus OX=10090 GN=Homer3 PE=1 SV=2
Q8CE33	KLH11_MOUSE	11.28	5	5	23.0959	25.1449	23.895	25.6292	80429		Kelch-like protein 11 OS=Mus musculus OX=10090 GN=Klhl11 PE=1 SV=1
Q9Z2I8	SUCB2_MOUSE	34.64	11	11	28.019	28.2979	27.6931	28.2759	46840	Oxidation (M)	Succinate--CoA ligase [GDP-forming] subunit beta, mitochondrial OS=Mus musculus OX=10090 GN=Suclg2 PE=1 SV=3
Q8BL95	CF298_MOUSE	8.97	2	2	22.9349	23.5165	23.1875	24.3101	33190		Cilia- and flagella-associated protein 298 OS=Mus musculus OX=10090 GN=Cfap298 PE=1 SV=1
Q8QZT1	THIL_MOUSE	38.68	10	10	29.1337	29.5444	29.524	29.94	44816	Oxidation (M)	Acetyl-CoA acetyltransferase, mitochondrial OS=Mus musculus OX=10090 GN=Acat1 PE=1 SV=1
P97789	XRN1_MOUSE	11.17	12	12	27.6527	26.8741	27.0296	27.0711	194307	Oxidation (M)	5'-3' exoribonuclease 1 OS=Mus musculus OX=10090 GN=Xrn1 PE=1 SV=1
Q61090	FZD7_MOUSE	1.4	1	1	22.4703	21.5915	23.7895	22.3895	63733		Frizzled-7 OS=Mus musculus OX=10090 GN=Fzd7 PE=1 SV=2
Q8BRM2	GORAB_MOUSE	12.23	3	3	23.0692	23.0267	23.6865	23.0477	41487	Acetylation (N-term)	RAB6-interacting golgin OS=Mus musculus OX=10090 GN=Gorab PE=1 SV=1
Q8CE46	PUS7L_MOUSE	7.83	4	4	23.02	23.7389	22.5951	23.1744	79197		Pseudouridylate synthase 7 homolog-like protein OS=Mus musculus OX=10090 GN=Pus7l PE=1 SV=1
P55194	3BP1_MOUSE	26.18	11	11	27.2979	27.5754	27.1507	27.5682	74172	Oxidation (M)	SH3 domain-binding protein 1 OS=Mus musculus OX=10090 GN=Sh3bp1 PE=1 SV=3
Q9ERR1	NDEL1_MOUSE	11.59	4	3	23.2535	23.2032	22.6778	23.2408	38366	Acetylation (N-term);Oxidation (M)	Nuclear distribution protein nudE-like 1 OS=Mus musculus OX=10090 GN=Ndel1 PE=1 SV=2
A2A8L5	PTPRF_MOUSE	0.84	1	1	20.9162	21.3712	20.7695	NaN	211489		Receptor-type tyrosine-protein phosphatase F OS=Mus musculus OX=10090 GN=Ptprf PE=1 SV=1
Q9JJA4	WDR12_MOUSE	40.9	11	11	27.7325	27.2714	27.9203	27.189	47346	Oxidation (M)	Ribosome biogenesis protein WDR12 OS=Mus musculus OX=10090 GN=Wdr12 PE=1 SV=1
Q78WZ7	RPA43_MOUSE	10.61	2	2	24.8904	25.1095	24.848	25.275	36721		DNA-directed RNA polymerase I subunit RPA43 OS=Mus musculus OX=10090 GN=Polr1f PE=1 SV=1
Q9CPV4	GLOD4_MOUSE	48.99	10	10	27.8081	27.9923	27.7958	27.8445	33317	Oxidation (M)	Glyoxalase domain-containing protein 4 OS=Mus musculus OX=10090 GN=Glod4 PE=1 SV=1
Q8K400	STXB5_MOUSE	6.25	4	4	22.7599	23.9316	23.8191	24.0772	127651		Syntaxin-binding protein 5 OS=Mus musculus OX=10090 GN=Stxbp5 PE=1 SV=3
Q9Z2D1	MTMR2_MOUSE	20.37	8	8	25.6458	25.8788	25.9111	25.867	73232	Oxidation (M)	Myotubularin-related protein 2 OS=Mus musculus OX=10090 GN=Mtmr2 PE=1 SV=3
Q921J4	UBE2S_MOUSE	45.74	5	5	27.0914	27.9705	26.7895	27.4234	24183	Acetylation (N-term);Oxidation (M)	Ubiquitin-conjugating enzyme E2 S OS=Mus musculus OX=10090 GN=Ube2s PE=1 SV=1
A6H5Y3	METH_MOUSE	9.74	8	8	23.9933	24.4923	24.0443	24.6096	139069	Oxidation (M)	Methionine synthase OS=Mus musculus OX=10090 GN=Mtr PE=1 SV=1
Q8C522	ENDD1_MOUSE	6.19	3	3	23.3511	24.6486	24.0526	24.7995	55262		Endonuclease domain-containing 1 protein OS=Mus musculus OX=10090 GN=Endod1 PE=1 SV=2
Q9JM58	CRLF1_MOUSE	18.35	5	5	27.3324	28.1795	26.9977	27.6458	46662		Cytokine receptor-like factor 1 OS=Mus musculus OX=10090 GN=Crlf1 PE=1 SV=1
Q8K221	ARFP2_MOUSE	6.74	2	2	24.239	24.6811	23.6971	24.9539	37773		Arfaptin-2 OS=Mus musculus OX=10090 GN=Arfip2 PE=1 SV=2
P49817	CAV1_MOUSE	25.84	4	4	28.7927	28.2353	29.6372	28.4707	20539		Caveolin-1 OS=Mus musculus OX=10090 GN=Cav1 PE=1 SV=1
Q6PNC0	DMXL1_MOUSE	3.65	6	6	23.2961	23.976	23.4923	23.5983	336008	Oxidation (M)	DmX-like protein 1 OS=Mus musculus OX=10090 GN=Dmxl1 PE=1 SV=1
O88271	CFDP1_MOUSE	25.76	5	5	28.9231	28.7064	28.2803	28.2535	32921		Craniofacial development protein 1 OS=Mus musculus OX=10090 GN=Cfdp1 PE=1 SV=1
P59759	MRTFB_MOUSE	8.61	4	4	24.5165	24.1871	23.6649	23.9406	117547		Myocardin-related transcription factor B OS=Mus musculus OX=10090 GN=Mrtfb PE=1 SV=1
Q8BKZ9	ODPX_MOUSE	10.38	3	3	25.4707	26.726	26.3894	25.9111	53999	Oxidation (M)	Pyruvate dehydrogenase protein X component, mitochondrial OS=Mus musculus OX=10090 GN=Pdhx PE=1 SV=1
Q6NZQ4	PAXI1_MOUSE	2.94	2	2	24.48	23.9406	21.5739	22.5297	119269	Oxidation (M)	PAX-interacting protein 1 OS=Mus musculus OX=10090 GN=Paxip1 PE=1 SV=1
Q99PP7	TRI33_MOUSE	4.29	4	4	24.895	25.4457	24.3645	24.7492	123843	Acetylation (N-term)	E3 ubiquitin-protein ligase TRIM33 OS=Mus musculus OX=10090 GN=Trim33 PE=1 SV=2
Q6NXI6	RPRD2_MOUSE	21.85	18	18	25.9473	26.0526	24.7945	26.9088	156586	Oxidation (M)	Regulation of nuclear pre-mRNA domain-containing protein 2 OS=Mus musculus OX=10090 GN=Rprd2 PE=1 SV=1
Q7TSJ2	MAP6_MOUSE	24.5	15	15	29.5259	29.3388	29.3641	29.3303	96450	Acetylation (N-term);Oxidation (M)	Microtubule-associated protein 6 OS=Mus musculus OX=10090 GN=Map6 PE=1 SV=2
Q6DFW5	AT11B_MOUSE	1.28	1	1	22.7793	23.0999	22.6913	21.9226	133536		Phospholipid-transporting ATPase IF OS=Mus musculus OX=10090 GN=Atp11b PE=1 SV=1
Q61316	HSP74_MOUSE	43.28	27	26	31.2077	31.5933	30.8682	31.4134	94133	Acetylation (N-term);Oxidation (M)	Heat shock 70 kDa protein 4 OS=Mus musculus OX=10090 GN=Hspa4 PE=1 SV=1
Q02788	CO6A2_MOUSE	12.57	10	10	26.4692	27.1795	26.5653	26.9316	110334	Oxidation (M)	Collagen alpha-2(VI) chain OS=Mus musculus OX=10090 GN=Col6a2 PE=1 SV=3
Q6GYP7	RGPA1_MOUSE	2.51	3	3	23.0247	23.5869	23.4923	23.3239	229389		Ral GTPase-activating protein subunit alpha-1 OS=Mus musculus OX=10090 GN=Ralgapa1 PE=1 SV=1
Q8BH74	NU107_MOUSE	47.19	29	29	31.3196	29.995	27.7708	31.1239	106717	Oxidation (M)	Nuclear pore complex protein Nup107 OS=Mus musculus OX=10090 GN=Nup107 PE=1 SV=1
Q640N1	AEBP1_MOUSE	13.65	11	11	25.8834	26.5638	25.9781	25.7024	128365	Oxidation (M)	Adipocyte enhancer-binding protein 1 OS=Mus musculus OX=10090 GN=Aebp1 PE=1 SV=1
Q9CQW2	ARL8B_MOUSE	20.97	5	2	26.4938	27.9203	26.6865	29.0813	21539	Oxidation (M)	ADP-ribosylation factor-like protein 8B OS=Mus musculus OX=10090 GN=Arl8b PE=1 SV=1
Q9D787	PPIL2_MOUSE	22.26	8	8	26.4815	26.6865	26.1234	26.5075	59065	Oxidation (M)	RING-type E3 ubiquitin-protein ligase PPIL2 OS=Mus musculus OX=10090 GN=Ppil2 PE=1 SV=2
C0HKE8	H2A1O_MOUSE	28.46	9	3	27.4551	29.6407	26.8264	28.9512	14135	NBF	Histone H2A type 1-O OS=Mus musculus OX=10090 GN=Hist1h2ao PE=1 SV=1
Q8R180	ERO1A_MOUSE	20.69	7	7	27.17	27.5682	26.9869	27.341	54084	Oxidation (M)	ERO1-like protein alpha OS=Mus musculus OX=10090 GN=Ero1a PE=1 SV=2
Q9QXM1	JMY_MOUSE	3.36	2	2	23.4041	24.0854	23.7389	23.5638	110586		Junction-mediating and -regulatory protein OS=Mus musculus OX=10090 GN=Jmy PE=1 SV=1
Q923W1	TGS1_MOUSE	7.97	3	3	23.7286	22.5953	23.7895	22.9831	96790		Trimethylguanosine synthase OS=Mus musculus OX=10090 GN=Tgs1 PE=1 SV=2
Q5SNZ0	GRDN_MOUSE	7.9	10	10	25.0317	25.4008	24.8904	25.0105	215918	Acetylation (N-term);Oxidation (M)	Girdin OS=Mus musculus OX=10090 GN=Ccdc88a PE=1 SV=2
Q9D0R9	WDR89_MOUSE	8.03	2	2	25.6012	25.9825	25.3031	25.1449	42470		WD repeat-containing protein 89 OS=Mus musculus OX=10090 GN=Wdr89 PE=2 SV=1
Q99L04	DHRS1_MOUSE	24.92	5	5	25.6971	25.6595	25.5195	25.3031	34005	Oxidation (M)	Dehydrogenase/reductase SDR family member 1 OS=Mus musculus OX=10090 GN=Dhrs1 PE=1 SV=1
Q9CQ19	MYL9_MOUSE	29.65	8	3	29.9814	29.7064	30.0217	29.1065	19854	Oxidation (M)	Myosin regulatory light polypeptide 9 OS=Mus musculus OX=10090 GN=Myl9 PE=1 SV=3
Q61656	DDX5_MOUSE	37.62	27	21	31.846	32.1694	31.5343	31.9916	69290	NBF;Oxidation (M)	Probable ATP-dependent RNA helicase DDX5 OS=Mus musculus OX=10090 GN=Ddx5 PE=1 SV=2
Q6P2L7	GOLM2_MOUSE	7.59	2	2	23.3645	23.2535	21.1709	21.8625	49409	Oxidation (M)	Protein GOLM2 OS=Mus musculus OX=10090 GN=Golm2 PE=1 SV=1
O89051	ITM2B_MOUSE	15.04	3	3	23.8288	25.4457	24.1642	25.1135	30260		Integral membrane protein 2B OS=Mus musculus OX=10090 GN=Itm2b PE=1 SV=1
Q30D77	COOA1_MOUSE	2.6	2	2	28.0864	28.7129	27.7645	28.6285	175733		Collagen alpha-1(XXIV) chain OS=Mus musculus OX=10090 GN=Col24a1 PE=2 SV=2
O08908	P85B_MOUSE	18.42	8	7	26.3943	24.7441	25.7995	24.848	81266		Phosphatidylinositol 3-kinase regulatory subunit beta OS=Mus musculus OX=10090 GN=Pik3r2 PE=1 SV=2
Q6A0A2	LAR4B_MOUSE	19.84	9	9	26.6865	26.8504	26.3578	26.9428	81627	Oxidation (M)	La-related protein 4B OS=Mus musculus OX=10090 GN=Larp4b PE=1 SV=2
Q3TCN2	PLBL2_MOUSE	7.07	3	3	24.7234	24.8764	25.772	25.1332	66289	Oxidation (M)	Putative phospholipase B-like 2 OS=Mus musculus OX=10090 GN=Plbd2 PE=1 SV=2
Q8BHG1	NRDC_MOUSE	23.6	19	19	28.0711	28.7958	27.9203	28.3452	132891	Oxidation (M)	Nardilysin OS=Mus musculus OX=10090 GN=Nrdc PE=1 SV=1
Q9CQ80	VPS25_MOUSE	51.7	7	7	26.9203	27.8974	27.1507	27.8741	20748		Vacuolar protein-sorting-associated protein 25 OS=Mus musculus OX=10090 GN=Vps25 PE=1 SV=1
Q9CTN4	RHBT3_MOUSE	4.42	2	2	23.0191	21.9168	23.3101	24.1642	69208		Rho-related BTB domain-containing protein 3 OS=Mus musculus OX=10090 GN=Rhobtb3 PE=2 SV=3
Q6PGG6	GNL3L_MOUSE	18.54	7	7	26.1015	26.604	26.1391	26.4057	65195	Oxidation (M)	Guanine nucleotide-binding protein-like 3-like protein OS=Mus musculus OX=10090 GN=Gnl3l PE=1 SV=1
Q8K1J6	TRNT1_MOUSE	30.88	10	10	27.4629	27.6251	27.3494	26.9977	49895	Oxidation (M)	CCA tRNA nucleotidyltransferase 1, mitochondrial OS=Mus musculus OX=10090 GN=Trnt1 PE=1 SV=1
E9Q7D5	ARHG5_MOUSE	6.7	6	6	22.7234	22.9834	22.9152	23.7796	176664	Acetylation (N-term);Oxidation (M)	Rho guanine nucleotide exchange factor 5 OS=Mus musculus OX=10090 GN=Arhgef5 PE=1 SV=1
Q8CBY1	SMAG1_MOUSE	18.99	8	8	25.7024	26.3745	26.0813	26.4138	78359	Oxidation (M)	Protein Smaug homolog 1 OS=Mus musculus OX=10090 GN=Samd4a PE=1 SV=2
Q9JM76	ARPC3_MOUSE	26.97	4	4	29.0839	29.5426	29.2714	29.8249	20525	Oxidation (M)	Actin-related protein 2/3 complex subunit 3 OS=Mus musculus OX=10090 GN=Arpc3 PE=1 SV=3
P59997	KDM2A_MOUSE	7.49	7	7	26.0833	27.1214	26.1449	27.1507	132680		Lysine-specific demethylase 2A OS=Mus musculus OX=10090 GN=Kdm2a PE=1 SV=2
P83093	STIM2_MOUSE	7.77	4	4	24.3511	24.6649	23.5165	24.5285	83925	Acetylation (N-term)	Stromal interaction molecule 2 OS=Mus musculus OX=10090 GN=Stim2 PE=1 SV=2
Q8BW96	KCC1D_MOUSE	13.51	6	4	25.5492	26.5507	25.0317	25.4614	42919		Calcium/calmodulin-dependent protein kinase type 1D OS=Mus musculus OX=10090 GN=Camk1d PE=1 SV=2
P70347	TANK_MOUSE	3.35	1	1	22.0808	22.1412	21.9127	22.0433	50939		TRAF family member-associated NF-kappa-B activator OS=Mus musculus OX=10090 GN=Tank PE=1 SV=1
Q8BUK6	HOOK3_MOUSE	36.77	21	21	26.8741	28.17	26.7895	27.9316	83218	Acetylation (N-term);Oxidation (M)	Protein Hook homolog 3 OS=Mus musculus OX=10090 GN=Hook3 PE=1 SV=2
Q8VHN8	TIRR_MOUSE	36.49	7	6	26.6458	27.3066	26.0041	26.5898	23414		Tudor-interacting repair regulator protein OS=Mus musculus OX=10090 GN=Nudt16l1 PE=1 SV=2
Q6WVG3	KCD12_MOUSE	23.85	4	4	24.2961	24.4362	24.2891	24.3511	35892		BTB/POZ domain-containing protein KCTD12 OS=Mus musculus OX=10090 GN=Kctd12 PE=1 SV=1
Q80VI1	TRI56_MOUSE	16.76	7	7	26.0041	26.976	25.4676	26.632	79513	Acetylation (N-term)	E3 ubiquitin-protein ligase TRIM56 OS=Mus musculus OX=10090 GN=Trim56 PE=1 SV=1
Q9DBL7	COASY_MOUSE	10.12	3	3	24.558	24.1946	24.3645	24.2317	62023		Bifunctional coenzyme A synthase OS=Mus musculus OX=10090 GN=Coasy PE=1 SV=2
Q6PHZ5	RB15B_MOUSE	15.22	8	8	25.1833	25.2353	24.7182	25.7077	97076	Acetylation (N-term)	Putative RNA-binding protein 15B OS=Mus musculus OX=10090 GN=Rbm15b PE=1 SV=2
P63280	UBC9_MOUSE	14.56	3	3	27.632	26.9539	28.1115	27.1795	18007		SUMO-conjugating enzyme UBC9 OS=Mus musculus OX=10090 GN=Ube2i PE=1 SV=1
P24860	CCNB1_MOUSE	8.14	2	2	25.6918	24.7695	24.7389	24.5165	48052	Oxidation (M)	G2/mitotic-specific cyclin-B1 OS=Mus musculus OX=10090 GN=Ccnb1 PE=1 SV=3
Q8CI08	SLAI2_MOUSE	20.48	7	7	27.0084	26.7129	26.3645	26.7895	62378	Acetylation (N-term);NBF;Oxidation (M)	SLAIN motif-containing protein 2 OS=Mus musculus OX=10090 GN=Slain2 PE=1 SV=2
Q8BWR4	UBP40_MOUSE	5.02	4	4	22.1906	22.6793	22.8261	22.7897	139952	Acetylation (N-term);Oxidation (M)	Ubiquitin carboxyl-terminal hydrolase 40 OS=Mus musculus OX=10090 GN=Usp40 PE=1 SV=2
Q6ZPV2	INO80_MOUSE	2.82	3	3	23.6209	23.9225	23.2106	23.48	176520	Acetylation (N-term)	Chromatin-remodeling ATPase INO80 OS=Mus musculus OX=10090 GN=Ino80 PE=1 SV=2
Q6NXM2	RCBT1_MOUSE	8.66	3	3	22.9351	23.4551	23.3778	22.2221	58379		RCC1 and BTB domain-containing protein 1 OS=Mus musculus OX=10090 GN=Rcbtb1 PE=1 SV=1
O88379	BAZ1A_MOUSE	7.2	9	9	27.3324	26.0233	27.0711	27.391	178459		Bromodomain adjacent to zinc finger domain protein 1A OS=Mus musculus OX=10090 GN=Baz1a PE=1 SV=3
Q64436	ATP4A_MOUSE	1.55	4	1	21.4261	24.2096	21.9145	24.0105	114016	Acetylation (N-term);NBF;Oxidation (M)	Potassium-transporting ATPase alpha chain 1 OS=Mus musculus OX=10090 GN=Atp4a PE=1 SV=3
Q8C8U0	LIPB1_MOUSE	37.05	27	25	27.8974	27.7581	27.3066	27.4234	108540	Acetylation (N-term);Oxidation (M)	Liprin-beta-1 OS=Mus musculus OX=10090 GN=Ppfibp1 PE=1 SV=3
Q9R0D8	WDR54_MOUSE	23.95	4	4	25.239	25.3204	24.9088	25.5869	35613		WD repeat-containing protein 54 OS=Mus musculus OX=10090 GN=Wdr54 PE=1 SV=1
Q9CPR4	RL17_MOUSE	44.57	9	9	32.1724	31.7252	31.6415	31.2591	21423	NBF;Oxidation (M)	60S ribosomal protein L17 OS=Mus musculus OX=10090 GN=Rpl17 PE=1 SV=3
E9PVB5	TTC17_MOUSE	1.42	1	1	21.8289	21.6486	22.4462	20.9809	135521		Tetratricopeptide repeat protein 17 OS=Mus musculus OX=10090 GN=Ttc17 PE=1 SV=1
Q9CWK8	SNX2_MOUSE	32.56	14	12	28.258	28.3662	28.0557	28.3153	58471	Oxidation (M)	Sorting nexin-2 OS=Mus musculus OX=10090 GN=Snx2 PE=1 SV=2
Q6P1G2	KDM2B_MOUSE	0.92	1	1	22.0246	20.844	21.4676	21.337	149733		Lysine-specific demethylase 2B OS=Mus musculus OX=10090 GN=Kdm2b PE=1 SV=1
P14152	MDHC_MOUSE	26.65	8	8	30.9746	30.8081	31.1361	30.7047	36511	Oxidation (M)	Malate dehydrogenase, cytoplasmic OS=Mus musculus OX=10090 GN=Mdh1 PE=1 SV=3
D3YZP9	CCDC6_MOUSE	18.12	7	7	29.7405	29.8799	29.1337	29.5898	52939	Oxidation (M)	Coiled-coil domain-containing protein 6 OS=Mus musculus OX=10090 GN=Ccdc6 PE=1 SV=1
Q80SY5	PR38B_MOUSE	1.66	1	1	20.5796	NaN	21.5194	20.527	63753		Pre-mRNA-splicing factor 38B OS=Mus musculus OX=10090 GN=Prpf38b PE=1 SV=1
Q9CQA5	MED4_MOUSE	20.37	4	4	24.8191	24.848	24.8433	25.5075	29781	Oxidation (M)	Mediator of RNA polymerase II transcription subunit 4 OS=Mus musculus OX=10090 GN=Med4 PE=2 SV=1
Q6P069	SORCN_MOUSE	22.22	4	4	28.4862	28.6458	27.8445	28.1361	21627	Oxidation (M)	Sorcin OS=Mus musculus OX=10090 GN=Sri PE=1 SV=1
Q80YR4	ZN598_MOUSE	14.54	8	8	26.5507	27.2262	25.9847	26.9428	99192	NBF;Oxidation (M)	E3 ubiquitin-protein ligase ZNF598 OS=Mus musculus OX=10090 GN=Znf598 PE=1 SV=1
Q7TQF2	FBX10_MOUSE	2.84	1	1	18.069	18.7721	17.0448	18.5407	104478		F-box only protein 10 OS=Mus musculus OX=10090 GN=Fbxo10 PE=1 SV=2
Q9CQL5	RM18_MOUSE	6.67	1	1	25.3877	26.2058	24.4862	25.4707	20677		39S ribosomal protein L18, mitochondrial OS=Mus musculus OX=10090 GN=Mrpl18 PE=1 SV=1
O88545	CSN6_MOUSE	22.53	4	4	28.8682	28.8593	28.8294	28.7453	35880	Oxidation (M)	COP9 signalosome complex subunit 6 OS=Mus musculus OX=10090 GN=Cops6 PE=1 SV=1
P97930	KTHY_MOUSE	5.66	1	1	21.988	22.1206	21.9506	22.0978	23915		Thymidylate kinase OS=Mus musculus OX=10090 GN=Dtymk PE=1 SV=2
Q9Z0H4	CELF2_MOUSE	3.15	1	1	24.632	24.4234	25.0401	24.0935	54271		CUGBP Elav-like family member 2 OS=Mus musculus OX=10090 GN=Celf2 PE=1 SV=1
Q9JJK5	HERP1_MOUSE	3.84	1	1	22.7179	22.7298	22.5928	22.7101	43907	Acetylation (N-term);Oxidation (M)	Homocysteine-responsive endoplasmic reticulum-resident ubiquitin-like domain member 1 protein OS=Mus musculus OX=10090 GN=Herpud1 PE=1 SV=1
Q8R242	DIAC_MOUSE	4.92	1	1	19.5791	20.4466	20.4322	19.2782	41295		Di-N-acetylchitobiase OS=Mus musculus OX=10090 GN=Ctbs PE=1 SV=2
Q9JJN0	POLH_MOUSE	5.62	2	2	23.5869	21.6445	23.5404	22.2106	76167		DNA polymerase eta OS=Mus musculus OX=10090 GN=Polh PE=1 SV=1
P70302	STIM1_MOUSE	7.74	4	4	25.3612	24.989	24.9672	24.8811	77567	Oxidation (M)	Stromal interaction molecule 1 OS=Mus musculus OX=10090 GN=Stim1 PE=1 SV=2
B8ZXI1	QTRT2_MOUSE	15.9	4	4	25.7129	26.0359	25.5841	25.7796	46288	Oxidation (M)	Queuine tRNA-ribosyltransferase accessory subunit 2 OS=Mus musculus OX=10090 GN=Qtrt2 PE=1 SV=2
P32020	SCP2_MOUSE	12.61	6	6	26.976	25.9383	26.4785	25.5667	59126	Oxidation (M)	Sterol carrier protein 2 OS=Mus musculus OX=10090 GN=Scp2 PE=1 SV=3
P11862	GAS2_MOUSE	20.06	4	4	24.7441	24.9628	25.1135	24.8904	34901	Oxidation (M)	Growth arrest-specific protein 2 OS=Mus musculus OX=10090 GN=Gas2 PE=1 SV=1
Q8BWT5	DIP2A_MOUSE	4.4	4	4	23.2821	22.7926	24.275	23.1818	165255	Oxidation (M)	Disco-interacting protein 2 homolog A OS=Mus musculus OX=10090 GN=Dip2a PE=1 SV=3
P55937	GOGA3_MOUSE	25.69	26	26	28.49	28.4234	28.17	29.0737	167220	Acetylation (N-term);Oxidation (M)	Golgin subfamily A member 3 OS=Mus musculus OX=10090 GN=Golga3 PE=1 SV=3
Q5ND52	MRM3_MOUSE	11.24	3	3	24.7796	25.2353	24.217	25.3342	46796	Oxidation (M)	rRNA methyltransferase 3, mitochondrial OS=Mus musculus OX=10090 GN=Mrm3 PE=2 SV=1
Q9QY66	ZNHI2_MOUSE	2.26	1	1	22.3128	24.8142	24.2891	24.9495	42897		Zinc finger HIT domain-containing protein 2 OS=Mus musculus OX=10090 GN=Znhit2 PE=2 SV=2
Q8VE10	NAA40_MOUSE	12.24	2	2	24.8191	24.8433	25.275	24.0275	27229		N-alpha-acetyltransferase 40 OS=Mus musculus OX=10090 GN=Naa40 PE=1 SV=1
Q71LX4	TLN2_MOUSE	4.46	16	6	23.1307	23.848	23.5404	29.5165	253621	Oxidation (M)	Talin-2 OS=Mus musculus OX=10090 GN=Tln2 PE=1 SV=3
Q9QZ06	TOLIP_MOUSE	26.28	4	4	26.604	26.9203	26.3342	27.0296	30345	Oxidation (M)	Toll-interacting protein OS=Mus musculus OX=10090 GN=Tollip PE=1 SV=1
O08582	GTPB1_MOUSE	26.5	11	11	27.7895	28.0914	27.6181	27.9088	72301	Oxidation (M)	GTP-binding protein 1 OS=Mus musculus OX=10090 GN=Gtpbp1 PE=1 SV=2
P28658	ATX10_MOUSE	36.63	14	14	29.8741	30.5573	29.8234	30.5933	53707	Oxidation (M)	Ataxin-10 OS=Mus musculus OX=10090 GN=Atxn10 PE=1 SV=2
Q8BGD9	IF4B_MOUSE	18.49	10	10	31.3672	31.3033	30.1842	30.9539	68840	Acetylation (N-term);Oxidation (M)	Eukaryotic translation initiation factor 4B OS=Mus musculus OX=10090 GN=Eif4b PE=1 SV=1
P58871	TB182_MOUSE	39.94	44	44	28.7325	29.0164	28.2891	28.6663	181825	Acetylation (N-term);NBF;Oxidation (M)	182 kDa tankyrase-1-binding protein OS=Mus musculus OX=10090 GN=Tnks1bp1 PE=1 SV=2
Q9CPT5	NOP16_MOUSE	24.72	3	3	26.4024	26.3729	26.239	26.5448	21139	Oxidation (M)	Nucleolar protein 16 OS=Mus musculus OX=10090 GN=Nop16 PE=1 SV=1
Q9R0Q4	MO4L2_MOUSE	31.94	7	6	26.5195	26.4266	26.2517	26.2768	32184	Oxidation (M)	Mortality factor 4-like protein 2 OS=Mus musculus OX=10090 GN=Morf4l2 PE=1 SV=1
P28653	PGS1_MOUSE	31.17	8	8	29.5573	29.1819	29.099	29.3787	41639		Biglycan OS=Mus musculus OX=10090 GN=Bgn PE=1 SV=1
Q8BGA7	CG026_MOUSE	8.48	2	2	24.1174	25.2821	24.2317	25.3066	49908	Oxidation (M)	Uncharacterized protein C7orf26 homolog OS=Mus musculus OX=10090 PE=2 SV=1
B2RXR6	ANR44_MOUSE	3.83	3	3	22.3348	22.6698	21.8595	22.3253	107385	Oxidation (M)	Serine/threonine-protein phosphatase 6 regulatory ankyrin repeat subunit B OS=Mus musculus OX=10090 GN=Ankrd44 PE=1 SV=1
Q99MK9	RASF1_MOUSE	3.82	1	1	21.5216	21.0097	21.5193	19.8882	38789		Ras association domain-containing protein 1 OS=Mus musculus OX=10090 GN=Rassf1 PE=1 SV=1
Q9DC23	DJC10_MOUSE	25.22	13	13	26.9977	27.0505	29.1239	27.0609	90583	Oxidation (M)	DnaJ homolog subfamily C member 10 OS=Mus musculus OX=10090 GN=Dnajc10 PE=1 SV=2
Q8VHK9	DHX36_MOUSE	23.18	17	16	27.4314	27.4785	27.3239	29.3066	113883	Acetylation (N-term);Oxidation (M)	ATP-dependent DNA/RNA helicase DHX36 OS=Mus musculus OX=10090 GN=Dhx36 PE=1 SV=2
Q8BYH7	TBC17_MOUSE	17.52	7	7	24.7389	26.1469	24.6486	25.6918	72860	Oxidation (M)	TBC1 domain family member 17 OS=Mus musculus OX=10090 GN=Tbc1d17 PE=1 SV=2
Q8BJ90	ZN771_MOUSE	8.83	3	3	30.2193	30.4334	29.6163	30.1483	35767		Zinc finger protein 771 OS=Mus musculus OX=10090 GN=Znf771 PE=2 SV=1
P08923	LTK_MOUSE	4.73	2	2	22.7896	22.3865	24.2961	20.9127	94471	Acetylation (N-term)	Leukocyte tyrosine kinase receptor OS=Mus musculus OX=10090 GN=Ltk PE=1 SV=3
Q9CQX8	RT36_MOUSE	50	4	4	24.8336	24.989	23.9847	24.4551	11101	Oxidation (M)	28S ribosomal protein S36, mitochondrial OS=Mus musculus OX=10090 GN=Mrps36 PE=1 SV=1
Q9QZD9	EIF3I_MOUSE	51.38	12	12	30.6713	29.9117	29.158	29.84	36461	Oxidation (M)	Eukaryotic translation initiation factor 3 subunit I OS=Mus musculus OX=10090 GN=Eif3i PE=1 SV=1
Q9D2L9	F111A_MOUSE	4.89	2	2	22.5855	21.6991	23.1424	21.9807	69949		Serine protease FAM111A OS=Mus musculus OX=10090 GN=Fam111a PE=2 SV=1
Q9D8B4	NDUAB_MOUSE	7.8	1	1	23.8191	23.3778	24.9672	22.7461	14982		NADH dehydrogenase [ubiquinone] 1 alpha subcomplex subunit 11 OS=Mus musculus OX=10090 GN=Ndufa11 PE=1 SV=2
Q3ZK22	VEZA_MOUSE	8.85	4	4	21.4803	21.6433	21.4475	20.1011	87987		Vezatin OS=Mus musculus OX=10090 GN=Vezt PE=1 SV=2
Q99P31	HPBP1_MOUSE	25.49	6	6	27.9372	28.7325	27.6663	28.6005	39167	Oxidation (M)	Hsp70-binding protein 1 OS=Mus musculus OX=10090 GN=Hspbp1 PE=1 SV=1
Q8JZN7	MIRO2_MOUSE	14.84	7	6	25.1253	25.391	24.5522	24.8385	69071		Mitochondrial Rho GTPase 2 OS=Mus musculus OX=10090 GN=Rhot2 PE=1 SV=1
Q6P9L6	KIF15_MOUSE	24.51	22	22	27.0084	26.7129	26.9088	27.0296	160120	Oxidation (M)	Kinesin-like protein KIF15 OS=Mus musculus OX=10090 GN=Kif15 PE=1 SV=1
Q6VN19	RBP10_MOUSE	17.74	8	7	26.4218	27.1507	25.7182	26.4923	67188	Acetylation (N-term);Oxidation (M)	Ran-binding protein 10 OS=Mus musculus OX=10090 GN=Ranbp10 PE=1 SV=2
Q8CFD4	SNX8_MOUSE	5.66	2	2	23.3511	22.6391	23.5754	22.4192	52059		Sorting nexin-8 OS=Mus musculus OX=10090 GN=Snx8 PE=1 SV=1
Q8BFP9	PDK1_MOUSE	7.83	2	2	22.6648	25.0317	24.3844	25.0854	48995		[Pyruvate dehydrogenase (acetyl-transferring)] kinase isozyme 1, mitochondrial OS=Mus musculus OX=10090 GN=Pdk1 PE=1 SV=2
Q9D2V5	AAR2_MOUSE	15.1	3	3	24.2463	25.902	24.918	25.1984	43408	Oxidation (M)	Protein AAR2 homolog OS=Mus musculus OX=10090 GN=Aar2 PE=1 SV=3
Q9JHH9	COPZ2_MOUSE	14.15	2	2	23.9406	24.4862	24.976	24.1488	22934		Coatomer subunit zeta-2 OS=Mus musculus OX=10090 GN=Copz2 PE=1 SV=1
Q70FJ1	AKAP9_MOUSE	5	13	13	24.1253	23.3376	23.976	23.5045	436233	NBF;Oxidation (M)	A-kinase anchor protein 9 OS=Mus musculus OX=10090 GN=Akap9 PE=1 SV=2
Q9R0P6	SC11A_MOUSE	30.17	4	4	28.7389	29.1652	28.4032	29.1604	20626	Acetylation (N-term);Oxidation (M)	Signal peptidase complex catalytic subunit SEC11A OS=Mus musculus OX=10090 GN=Sec11a PE=1 SV=1
Q9CXW4	RL11_MOUSE	33.71	6	6	31.7373	31.5203	31.9081	31.5389	20252	NBF	60S ribosomal protein L11 OS=Mus musculus OX=10090 GN=Rpl11 PE=1 SV=4
Q9JI91	ACTN2_MOUSE	2.46	16	2	23.0194	23.5638	22.9747	23.1088	103834		Alpha-actinin-2 OS=Mus musculus OX=10090 GN=Actn2 PE=1 SV=2
Q3U308	CTU2_MOUSE	19.26	7	7	26.2299	26.9088	25.9066	26.0752	56105		Cytoplasmic tRNA 2-thiolation protein 2 OS=Mus musculus OX=10090 GN=Ctu2 PE=1 SV=1
Q61578	ADRO_MOUSE	10.12	4	4	24.0443	25.8974	23.9672	25.1565	54202		NADPH:adrenodoxin oxidoreductase, mitochondrial OS=Mus musculus OX=10090 GN=Fdxr PE=1 SV=1
Q5U5M8	BL1S3_MOUSE	8.21	1	1	20.3928	20.8863	20.1222	21.4044	20398		Biogenesis of lysosome-related organelles complex 1 subunit 3 OS=Mus musculus OX=10090 GN=Bloc1s3 PE=1 SV=1
Q6NZN0	RBM26_MOUSE	12.55	10	9	25.7846	25.5812	25.3511	25.3477	114143	Oxidation (M)	RNA-binding protein 26 OS=Mus musculus OX=10090 GN=Rbm26 PE=1 SV=2
Q9D0C1	RN115_MOUSE	6.23	2	2	22.8508	24.558	23.7286	24.1332	33859	Acetylation (N-term)	E3 ubiquitin-protein ligase RNF115 OS=Mus musculus OX=10090 GN=Rnf115 PE=1 SV=1
Q91YP3	DEOC_MOUSE	37.11	8	8	26.1469	27.17	26.2661	26.509	34975	Oxidation (M)	Deoxyribose-phosphate aldolase OS=Mus musculus OX=10090 GN=Dera PE=1 SV=1
Q64133	AOFA_MOUSE	33.27	11	11	28.3951	28.4938	28.5862	28.3153	59602	Acetylation (N-term);Oxidation (M)	Amine oxidase [flavin-containing] A OS=Mus musculus OX=10090 GN=Maoa PE=1 SV=3
Q923X4	GLRX2_MOUSE	19.23	2	2	20.4376	22.7149	18.6551	22.2272	17307	Acetylation (N-term)	Glutaredoxin-2, mitochondrial OS=Mus musculus OX=10090 GN=Glrx2 PE=1 SV=1
Q3TCH7	CUL4A_MOUSE	8.3	10	5	24.2607	24.9088	25.275	23.9933	87753	Oxidation (M)	Cullin-4A OS=Mus musculus OX=10090 GN=Cul4a PE=1 SV=1
P28660	NCKP1_MOUSE	25.53	21	21	28.5826	28.4354	28.019	28.1312	128784	Oxidation (M)	Nck-associated protein 1 OS=Mus musculus OX=10090 GN=Nckap1 PE=1 SV=2
O88811	STAM2_MOUSE	16.63	7	6	26.2426	25.3066	26.0338	25.4551	57455	Oxidation (M)	Signal transducing adapter molecule 2 OS=Mus musculus OX=10090 GN=Stam2 PE=1 SV=1
Q8K1R3	PNPT1_MOUSE	22.09	12	12	25.8904	26.4122	25.7846	26.2188	85683	Oxidation (M)	Polyribonucleotide nucleotidyltransferase 1, mitochondrial OS=Mus musculus OX=10090 GN=Pnpt1 PE=1 SV=1
Q8BGV4	TTI2_MOUSE	2.54	1	1	24.6431	25.6237	23.6865	25.417	56702		TELO2-interacting protein 2 OS=Mus musculus OX=10090 GN=Tti2 PE=2 SV=1
P62965	RABP1_MOUSE	16.79	2	2	25.8215	26.4089	25.0062	26.217	15592		Cellular retinoic acid-binding protein 1 OS=Mus musculus OX=10090 GN=Crabp1 PE=1 SV=2
Q7SIG6	ASAP2_MOUSE	1.46	1	1	21.3425	21.8267	19.8859	19.9844	106805		Arf-GAP with SH3 domain, ANK repeat and PH domain-containing protein 2 OS=Mus musculus OX=10090 GN=Asap2 PE=1 SV=3
A2ADA5	PUSL1_MOUSE	10.65	2	2	24.417	24.6811	24.0526	24.5463	31993		tRNA pseudouridine synthase-like 1 OS=Mus musculus OX=10090 GN=Pusl1 PE=1 SV=1
O54956	DPOE2_MOUSE	18.98	5	5	21.5342	25.239	24.3376	25.6649	59387	Oxidation (M)	DNA polymerase epsilon subunit 2 OS=Mus musculus OX=10090 GN=Pole2 PE=2 SV=2
Q8BMB3	IF4E2_MOUSE	15.1	2	2	24.2607	23.3778	24.6153	24.391	28263		Eukaryotic translation initiation factor 4E type 2 OS=Mus musculus OX=10090 GN=Eif4e2 PE=1 SV=1
Q6ZQL4	WDR43_MOUSE	24.52	12	12	28.7453	29.3578	28.8355	29.2647	75381	Oxidation (M)	WD repeat-containing protein 43 OS=Mus musculus OX=10090 GN=Wdr43 PE=1 SV=2
O08736	CASPC_MOUSE	3.1	1	1	23.6649	22.6167	22.6585	22.5581	47854	Oxidation (M)	Caspase-12 OS=Mus musculus OX=10090 GN=Casp12 PE=1 SV=1
Q924H2	MED15_MOUSE	7.48	3	3	24.275	22.6989	23.9316	23.8858	86607	Oxidation (M)	Mediator of RNA polymerase II transcription subunit 15 OS=Mus musculus OX=10090 GN=Med15 PE=1 SV=3
Q62073	M3K7_MOUSE	8.81	4	4	24.0691	23.5754	22.9032	23.8385	64228	Oxidation (M)	Mitogen-activated protein kinase kinase kinase 7 OS=Mus musculus OX=10090 GN=Map3k7 PE=1 SV=1
Q9D8Y0	EFHD2_MOUSE	25	6	6	27.3745	27.9031	26.9428	27.5826	26791	Oxidation (M)	EF-hand domain-containing protein D2 OS=Mus musculus OX=10090 GN=Efhd2 PE=1 SV=1
Q3UGC7	EI3JA_MOUSE	48.66	10	10	30.0217	30.1842	29.3494	29.6458	29344	Acetylation (N-term);Oxidation (M)	Eukaryotic translation initiation factor 3 subunit J-A OS=Mus musculus OX=10090 GN=Eif3j1 PE=2 SV=1
P26450	P85A_MOUSE	1.66	2	1	22.8524	23.9406	23.5165	24.4298	83517		Phosphatidylinositol 3-kinase regulatory subunit alpha OS=Mus musculus OX=10090 GN=Pik3r1 PE=1 SV=2
Q99MN1	SYK_MOUSE	28.24	15	15	31.0673	31.2759	31.0544	30.8682	67840	Acetylation (N-term);Oxidation (M)	Lysine--tRNA ligase OS=Mus musculus OX=10090 GN=Kars1 PE=1 SV=1
Q9JLR9	HIG1A_MOUSE	51.58	3	3	27.2714	27.5969	26.9539	27.5754	10425	Acetylation (N-term);Oxidation (M)	HIG1 domain family member 1A, mitochondrial OS=Mus musculus OX=10090 GN=Higd1a PE=1 SV=1
P59110	SENP1_MOUSE	7.03	2	2	22.7668	19.8551	22.1591	22.5381	72511	Oxidation (M)	Sentrin-specific protease 1 OS=Mus musculus OX=10090 GN=Senp1 PE=1 SV=1
Q61083	M3K2_MOUSE	2.26	1	1	19.9526	17.6968	19.9496	18.485	69574		Mitogen-activated protein kinase kinase kinase 2 OS=Mus musculus OX=10090 GN=Map3k2 PE=1 SV=2
Q9EQX4	AIF1L_MOUSE	22.67	2	2	25.7568	25.3612	25.5754	24.976	17024	Oxidation (M)	Allograft inflammatory factor 1-like OS=Mus musculus OX=10090 GN=Aif1l PE=1 SV=1
Q9CQ86	MIEN1_MOUSE	9.57	1	1	25.4266	25.6012	24.6757	24.7234	12295		Migration and invasion enhancer 1 OS=Mus musculus OX=10090 GN=Mien1 PE=1 SV=1
Q61398	PCOC1_MOUSE	32.91	10	10	29.6612	30.3515	29.6389	30.2077	50168	Oxidation (M)	Procollagen C-endopeptidase enhancer 1 OS=Mus musculus OX=10090 GN=Pcolce PE=1 SV=2
Q8BS95	GPHR_MOUSE	8.57	2	2	24.3975	26.3477	24.3101	24.9406	52735		Golgi pH regulator OS=Mus musculus OX=10090 GN=Gpr89 PE=1 SV=2
Q9D7M1	GID8_MOUSE	53.51	7	7	27.0813	27.2714	26.9539	26.9869	26779	Acetylation (N-term);Oxidation (M)	Glucose-induced degradation protein 8 homolog OS=Mus musculus OX=10090 GN=Gid8 PE=1 SV=1
P23336	GGTA1_MOUSE	4.57	1	1	NaN	20.189	20.3082	21.7604	46475	Oxidation (M)	N-acetyllactosaminide alpha-1,3-galactosyltransferase OS=Mus musculus OX=10090 GN=Ggta1 PE=2 SV=1
O88622	PARG_MOUSE	7.02	5	5	24.558	25.9225	25.3811	26.0772	109324		Poly(ADP-ribose) glycohydrolase OS=Mus musculus OX=10090 GN=Parg PE=1 SV=2
Q9JJA2	COG8_MOUSE	3.28	2	2	23.2077	23.6757	22.3465	23.7594	71602	Oxidation (M)	Conserved oligomeric Golgi complex subunit 8 OS=Mus musculus OX=10090 GN=Cog8 PE=1 SV=3
O35857	TIM44_MOUSE	29.2	12	12	28.1214	28.203	27.6798	28.1361	51091	Oxidation (M)	Mitochondrial import inner membrane translocase subunit TIM44 OS=Mus musculus OX=10090 GN=Timm44 PE=1 SV=2
Q9CWR2	SMYD3_MOUSE	3.04	1	1	22.1593	24.2535	23.6757	24.6153	49126		Histone-lysine N-methyltransferase SMYD3 OS=Mus musculus OX=10090 GN=Smyd3 PE=2 SV=1
Q61704	ITIH3_MOUSE	4.95	4	4	28.3494	27.611	27.3578	28.3066	99358		Inter-alpha-trypsin inhibitor heavy chain H3 OS=Mus musculus OX=10090 GN=Itih3 PE=1 SV=3
Q8R3H9	TTC4_MOUSE	28.24	6	6	25.6998	26.3861	25.792	26.0505	44339	Acetylation (N-term);Oxidation (M)	Tetratricopeptide repeat protein 4 OS=Mus musculus OX=10090 GN=Ttc4 PE=1 SV=1
Q9DAW6	PRP4_MOUSE	20.92	7	7	27.6458	28.2935	27.6798	27.9088	58370		U4/U6 small nuclear ribonucleoprotein Prp4 OS=Mus musculus OX=10090 GN=Prpf4 PE=1 SV=1
Q91W96	APC4_MOUSE	15.24	9	9	27.3662	27.7645	27.0084	27.8264	91708	Oxidation (M)	Anaphase-promoting complex subunit 4 OS=Mus musculus OX=10090 GN=Anapc4 PE=1 SV=1
Q8VD66	ABHD4_MOUSE	3.51	1	1	18.427	NaN	20.2848	18.6552	38861		(Lyso)-N-acylphosphatidylethanolamine lipase OS=Mus musculus OX=10090 GN=Abhd4 PE=1 SV=1
Q9ESW8	PGPI_MOUSE	11	1	1	24.1332	21.5395	23.9406	23.2281	22934		Pyroglutamyl-peptidase 1 OS=Mus musculus OX=10090 GN=Pgpep1 PE=1 SV=1
Q8BGX2	TIM29_MOUSE	11.28	2	2	24.2021	24.4298	24.002	24.6595	29415		Mitochondrial import inner membrane translocase subunit Tim29 OS=Mus musculus OX=10090 GN=Timm29 PE=1 SV=1
Q9CPN8	IF2B3_MOUSE	24.35	12	10	27.965	27.1214	27.5754	27.2445	63575	Oxidation (M)	Insulin-like growth factor 2 mRNA-binding protein 3 OS=Mus musculus OX=10090 GN=Igf2bp3 PE=1 SV=1
Q62086	PON2_MOUSE	16.1	3	3	24.3307	24.5285	24.8288	24.9271	39617		Serum paraoxonase/arylesterase 2 OS=Mus musculus OX=10090 GN=Pon2 PE=1 SV=2
P54103	DNJC2_MOUSE	24.32	12	12	27.0296	26.7895	26.7517	26.433	71722	Oxidation (M)	DnaJ homolog subfamily C member 2 OS=Mus musculus OX=10090 GN=Dnajc2 PE=1 SV=2
Q920A5	RISC_MOUSE	11.28	4	4	28.0084	27.2891	27.2625	27.1795	50965	Oxidation (M)	Retinoid-inducible serine carboxypeptidase OS=Mus musculus OX=10090 GN=Scpep1 PE=1 SV=2
P60710	ACTB_MOUSE	7.47	39	4	29.258	30.1115	28.1842	30.6798	41737	Acetylation (N-term);NBF;Oxidation (M)	Actin, cytoplasmic 1 OS=Mus musculus OX=10090 GN=Actb PE=1 SV=1
Q9CQE8	RTRAF_MOUSE	54.51	11	11	28.6181	28.4354	28.1015	28.4629	28152	Oxidation (M)	RNA transcription, translation and transport factor protein OS=Mus musculus OX=10090 GN=RTRAF PE=1 SV=1
P54729	NUB1_MOUSE	13.52	5	5	26.6998	26.8504	26.3307	27.509	70307	Oxidation (M)	NEDD8 ultimate buster 1 OS=Mus musculus OX=10090 GN=Nub1 PE=1 SV=2
Q9CPY6	GID4_MOUSE	9.22	1	1	21.5675	NaN	22.103	21.2053	24863		Glucose-induced degradation protein 4 homolog OS=Mus musculus OX=10090 GN=Gid4 PE=1 SV=1
Q8CD92	TTC27_MOUSE	12.63	8	8	25.7945	25.8623	25.4923	25.7995	96431	Oxidation (M)	Tetratricopeptide repeat protein 27 OS=Mus musculus OX=10090 GN=Ttc27 PE=1 SV=2
Q3U3T8	WDR62_MOUSE	4.2	4	4	23.8858	24.6486	24.2821	24.2243	167283	Oxidation (M)	WD repeat-containing protein 62 OS=Mus musculus OX=10090 GN=Wdr62 PE=1 SV=2
Q9R118	HTRA1_MOUSE	23.54	7	7	26.7517	26.1908	26.8385	26.3239	51214		Serine protease HTRA1 OS=Mus musculus OX=10090 GN=Htra1 PE=1 SV=2
Q99LI7	CSTF3_MOUSE	23.43	14	14	27.6663	28.1361	27.0914	27.5898	82877	Acetylation (N-term);Oxidation (M)	Cleavage stimulation factor subunit 3 OS=Mus musculus OX=10090 GN=Cstf3 PE=1 SV=1
P07214	SPRC_MOUSE	7.62	2	2	27.2891	28.1115	27.3324	26.4598	34450		SPARC OS=Mus musculus OX=10090 GN=Sparc PE=1 SV=1
Q6PG16	HJURP_MOUSE	9.6	4	4	24.0275	24.3444	23.6649	23.8093	74199		Holliday junction recognition protein OS=Mus musculus OX=10090 GN=Hjurp PE=1 SV=1
Q8BW70	UBP38_MOUSE	3.07	2	2	22.5071	22.6198	22.1158	22.2897	116102	Oxidation (M)	Ubiquitin carboxyl-terminal hydrolase 38 OS=Mus musculus OX=10090 GN=Usp38 PE=1 SV=2
Q91YK2	RRP1B_MOUSE	28.18	12	12	26.3494	27.2979	26.3629	26.8504	80582	Acetylation (N-term);NBF;Oxidation (M)	Ribosomal RNA processing protein 1 homolog B OS=Mus musculus OX=10090 GN=Rrp1b PE=1 SV=2
Q8K339	KIN17_MOUSE	18.93	6	6	25.5315	25.867	25.4234	25.5285	44722	Oxidation (M)	DNA/RNA-binding protein KIN17 OS=Mus musculus OX=10090 GN=Kin PE=1 SV=1
Q60I26	AL2CL_MOUSE	2.94	2	2	20.9903	21.1453	21.0052	21.6819	108146		ALS2 C-terminal-like protein OS=Mus musculus OX=10090 GN=Als2cl PE=1 SV=1
Q8K0C9	GMDS_MOUSE	23.92	6	6	27.2445	27.6931	26.8974	27.7389	41985		GDP-mannose 4,6 dehydratase OS=Mus musculus OX=10090 GN=Gmds PE=1 SV=1
Q8BRH3	RHG19_MOUSE	6.48	2	2	22.0532	22.7501	22.3027	22.7091	55734		Rho GTPase-activating protein 19 OS=Mus musculus OX=10090 GN=Arhgap19 PE=1 SV=2
Q61187	TS101_MOUSE	29.41	8	8	27.4785	28.1556	26.8504	27.2714	44124	Oxidation (M)	Tumor susceptibility gene 101 protein OS=Mus musculus OX=10090 GN=Tsg101 PE=1 SV=2
P52734	FGD1_MOUSE	3.33	2	2	23.3778	23.3511	23.133	22.6665	106365		FYVE, RhoGEF and PH domain-containing protein 1 OS=Mus musculus OX=10090 GN=Fgd1 PE=1 SV=2
Q61249	IGBP1_MOUSE	24.71	6	6	27.8385	28.3869	27.3745	28.7162	38971	Acetylation (N-term);Oxidation (M)	Immunoglobulin-binding protein 1 OS=Mus musculus OX=10090 GN=Igbp1 PE=1 SV=1
Q8BS45	IFT56_MOUSE	3.61	1	1	22.2709	22.2524	22.5162	22.3193	64151		Intraflagellar transport protein 56 OS=Mus musculus OX=10090 GN=Ttc26 PE=1 SV=1
Q5U4F6	DC2I2_MOUSE	3.54	1	1	22.7113	23.1385	22.0395	23.2281	58174	Acetylation (N-term)	Cytoplasmic dynein 2 intermediate chain 2 OS=Mus musculus OX=10090 GN=Dync2i2 PE=1 SV=3
Q80U58	PUM2_MOUSE	7.04	6	5	25.4583	26.1585	26.2353	25.6513	114314		Pumilio homolog 2 OS=Mus musculus OX=10090 GN=Pum2 PE=1 SV=2
Q2NL51	GSK3A_MOUSE	38.78	11	9	28.7325	28.7581	28.8623	28.4314	51661	Acetylation (N-term);Oxidation (M)	Glycogen synthase kinase-3 alpha OS=Mus musculus OX=10090 GN=Gsk3a PE=1 SV=2
A2AI08	TPRN_MOUSE	14.69	5	5	22.021	22.6311	21.7082	23.2067	80089	Oxidation (M)	Taperin OS=Mus musculus OX=10090 GN=Tprn PE=1 SV=1
Q60973	RBBP7_MOUSE	26.12	12	7	28.9484	28.4668	28.7453	28.2759	47790	Acetylation (N-term);Oxidation (M)	Histone-binding protein RBBP7 OS=Mus musculus OX=10090 GN=Rbbp7 PE=1 SV=1
Q9WTR5	CAD13_MOUSE	4.06	2	2	23.4676	23.7492	23.391	23.1285	78186	Oxidation (M)	Cadherin-13 OS=Mus musculus OX=10090 GN=Cdh13 PE=1 SV=2
Q8VDI7	UBAC1_MOUSE	3.18	1	1	21.904	20.4963	21.5127	20.8215	45531		Ubiquitin-associated domain-containing protein 1 OS=Mus musculus OX=10090 GN=Ubac1 PE=1 SV=2
Q9CZY3	UB2V1_MOUSE	19.05	6	2	26.5754	27.4234	25.792	27.141	16355	Acetylation (N-term);Oxidation (M)	Ubiquitin-conjugating enzyme E2 variant 1 OS=Mus musculus OX=10090 GN=Ube2v1 PE=1 SV=1
P00687	AMY1_MOUSE	3.13	1	1	20.2194	21.4676	21.3331	21.0018	57644		Alpha-amylase 1 OS=Mus musculus OX=10090 GN=Amy1 PE=1 SV=2
Q99LQ1	MBIP1_MOUSE	8.5	2	2	25.6676	23.895	23.8576	22.9339	38333	Acetylation (N-term)	MAP3K12-binding inhibitory protein 1 OS=Mus musculus OX=10090 GN=Mbip PE=1 SV=1
Q8BJH1	ZC21A_MOUSE	16.98	4	4	24.5105	25.1055	24.3511	24.8764	35152		Zinc finger C2HC domain-containing protein 1A OS=Mus musculus OX=10090 GN=Zc2hc1a PE=1 SV=1
P06537	GCR_MOUSE	20.05	9	9	25.9955	26.0062	25.9781	26.2114	86053	Oxidation (M)	Glucocorticoid receptor OS=Mus musculus OX=10090 GN=Nr3c1 PE=1 SV=1
Q9CQT5	POMP_MOUSE	32.62	3	3	26.5754	26.7517	26.1984	26.7895	15766		Proteasome maturation protein OS=Mus musculus OX=10090 GN=Pomp PE=1 SV=1
Q9D0V7	RCAS1_MOUSE	7.98	1	1	22.7871	23.6971	22.9564	21.8106	24319		Receptor-binding cancer antigen expressed on SiSo cells OS=Mus musculus OX=10090 GN=Ebag9 PE=1 SV=2
Q8BQZ5	CPSF4_MOUSE	14.22	2	2	25.4394	24.5045	21.9375	25.6068	23653	Acetylation (N-term);Oxidation (M)	Cleavage and polyadenylation specificity factor subunit 4 OS=Mus musculus OX=10090 GN=Cpsf4 PE=2 SV=1
Q8K2J0	PLCD3_MOUSE	6.62	3	3	23.6865	25.3778	23.9043	24.989	88607	Oxidation (M)	1-phosphatidylinositol 4,5-bisphosphate phosphodiesterase delta-3 OS=Mus musculus OX=10090 GN=Plcd3 PE=1 SV=2
P54731	FAF1_MOUSE	29.12	14	14	28.0453	30.3828	28.203	29.6216	73863	Oxidation (M)	FAS-associated factor 1 OS=Mus musculus OX=10090 GN=Faf1 PE=1 SV=2
Q8BJ71	NUP93_MOUSE	31.5	21	21	29.6005	29.7755	29.0839	29.5033	93281	Acetylation (N-term);Oxidation (M)	Nuclear pore complex protein Nup93 OS=Mus musculus OX=10090 GN=Nup93 PE=1 SV=1
Q9D394	RUFY3_MOUSE	3.2	1	1	25.8215	24.019	24.9628	23.8385	53007		Protein RUFY3 OS=Mus musculus OX=10090 GN=Rufy3 PE=1 SV=1
Q8C3Y4	KNTC1_MOUSE	8.47	15	15	26.2553	26.8858	26.2299	26.8142	250358	Oxidation (M)	Kinetochore-associated protein 1 OS=Mus musculus OX=10090 GN=Kntc1 PE=1 SV=2
P14901	HMOX1_MOUSE	51.21	10	10	30.2979	30.4134	29.7178	29.7341	32929	Acetylation (N-term);Oxidation (M)	Heme oxygenase 1 OS=Mus musculus OX=10090 GN=Hmox1 PE=1 SV=1
Q7TS74	CKP2L_MOUSE	11.81	5	5	23.3645	23.7695	23.5638	22.6054	82999		Cytoskeleton-associated protein 2-like OS=Mus musculus OX=10090 GN=Ckap2l PE=1 SV=1
Q61035	HARS1_MOUSE	35.17	16	13	29.5555	30.1483	29.2512	30.2193	57432	Acetylation (N-term);Oxidation (M)	Histidine--tRNA ligase, cytoplasmic OS=Mus musculus OX=10090 GN=Hars1 PE=1 SV=2
Q9Z110	P5CS_MOUSE	43.4	26	26	29.6337	29.9259	30.3724	31.1664	87266	Acetylation (N-term);Oxidation (M)	Delta-1-pyrroline-5-carboxylate synthase OS=Mus musculus OX=10090 GN=Aldh18a1 PE=1 SV=2
P70245	EBP_MOUSE	15.22	3	3	25.9716	26.4266	26.5682	26.6998	26215	Acetylation (N-term)	3-beta-hydroxysteroid-Delta(8),Delta(7)-isomerase OS=Mus musculus OX=10090 GN=Ebp PE=1 SV=3
Q3UPH7	ARH40_MOUSE	25.91	27	27	28.203	28.1842	25.6292	27.7129	165132	Acetylation (N-term);NBF;Oxidation (M)	Rho guanine nucleotide exchange factor 40 OS=Mus musculus OX=10090 GN=Arhgef40 PE=1 SV=1
Q61703	ITIH2_MOUSE	7.4	4	4	30.8385	30.4134	29.9677	30.4629	105928		Inter-alpha-trypsin inhibitor heavy chain H2 OS=Mus musculus OX=10090 GN=Itih2 PE=1 SV=1
Q8C547	HTR5B_MOUSE	11.93	16	16	25.065	26.3083	24.5225	27.7195	224319	Acetylation (N-term);NBF;Oxidation (M)	HEAT repeat-containing protein 5B OS=Mus musculus OX=10090 GN=Heatr5b PE=1 SV=3
Q5FWH2	UNKL_MOUSE	3.03	1	1	21.3713	21.3123	21.284	20.0451	79636		Putative E3 ubiquitin-protein ligase UNKL OS=Mus musculus OX=10090 GN=Unkl PE=2 SV=2
P14115	RL27A_MOUSE	33.11	7	7	32.4334	32.6839	32.4823	32.4483	16605	NBF;Oxidation (M)	60S ribosomal protein L27a OS=Mus musculus OX=10090 GN=Rpl27a PE=1 SV=5
Q8C0J6	SWAHC_MOUSE	14.45	5	5	23.7286	24.1795	23.5045	24.0443	54938	Acetylation (N-term);Oxidation (M)	Ankyrin repeat domain-containing protein SOWAHC OS=Mus musculus OX=10090 GN=Sowahc PE=1 SV=2
Q9JKR6	HYOU1_MOUSE	52.85	35	35	31.2193	31.2019	31.015	31.1483	111181	Oxidation (M)	Hypoxia up-regulated protein 1 OS=Mus musculus OX=10090 GN=Hyou1 PE=1 SV=1
Q9Z0S9	PRAF1_MOUSE	15.68	2	2	25.1681	25.7771	25.5551	25.6375	20619		Prenylated Rab acceptor protein 1 OS=Mus musculus OX=10090 GN=Rabac1 PE=1 SV=1
Q9WVL0	MAAI_MOUSE	6.02	1	1	23.1292	21.7808	23.0324	21.8438	24275		Maleylacetoacetate isomerase OS=Mus musculus OX=10090 GN=Gstz1 PE=1 SV=1
Q9DAW9	CNN3_MOUSE	54.24	15	14	30.7533	29.9677	30.2077	29.8203	36429	Acetylation (N-term);Oxidation (M)	Calponin-3 OS=Mus musculus OX=10090 GN=Cnn3 PE=1 SV=1
Q6KAQ7	ZZZ3_MOUSE	1.65	1	1	21.1499	21.6408	21.0656	21.3052	102307		ZZ-type zinc finger-containing protein 3 OS=Mus musculus OX=10090 GN=Zzz3 PE=1 SV=2
P50516	VATA_MOUSE	45.87	20	20	29.747	30.2193	30.3515	29.94	68326	Oxidation (M)	V-type proton ATPase catalytic subunit A OS=Mus musculus OX=10090 GN=Atp6v1a PE=1 SV=2
P26041	MOES_MOUSE	43.5	40	27	33.5412	33.6415	32.7613	32.9933	67767	Acetylation (N-term);NBF;Oxidation (M)	Moesin OS=Mus musculus OX=10090 GN=Msn PE=1 SV=3
Q8R060	ZWILC_MOUSE	18.34	7	7	25.8118	25.848	25.7155	25.7338	66839	Oxidation (M)	Protein zwilch homolog OS=Mus musculus OX=10090 GN=Zwilch PE=1 SV=1
P33215	NEDD1_MOUSE	22.58	8	8	25.2463	25.3545	25.0772	25.4923	71292	Acetylation (N-term);Oxidation (M)	Protein NEDD1 OS=Mus musculus OX=10090 GN=Nedd1 PE=1 SV=2
P36895	BMR1A_MOUSE	3.01	1	1	22.339	23.1841	21.9821	22.8146	60063		Bone morphogenetic protein receptor type-1A OS=Mus musculus OX=10090 GN=Bmpr1a PE=1 SV=1
Q9JIF7	COPB_MOUSE	37.88	27	27	30.0609	30.9259	29.7047	30.846	107066	Oxidation (M)	Coatomer subunit beta OS=Mus musculus OX=10090 GN=Copb1 PE=1 SV=1
Q64520	KGUA_MOUSE	22.73	3	3	24.6431	24.4984	24.3975	24.3712	21918	Oxidation (M)	Guanylate kinase OS=Mus musculus OX=10090 GN=Guk1 PE=1 SV=2
Q9DAP7	ASF1B_MOUSE	17.33	2	2	24.2317	25.2926	24.8433	24.5696	22464		Histone chaperone ASF1B OS=Mus musculus OX=10090 GN=Asf1b PE=1 SV=1
Q8C5K5	CX038_MOUSE	17.19	3	3	23.6096	22.2873	23.9406	22.9719	36589	Oxidation (M)	Uncharacterized protein CXorf38 homolog OS=Mus musculus OX=10090 PE=1 SV=1
Q6ZWM4	LSM8_MOUSE	82.29	5	5	30.7373	31.0737	30.3196	30.6964	10403	Acetylation (N-term)	U6 snRNA-associated Sm-like protein LSm8 OS=Mus musculus OX=10090 GN=Lsm8 PE=1 SV=3
Q9CR13	FMC1_MOUSE	13.27	1	1	23.6865	24.3376	23.2313	24.0359	12695		Protein FMC1 homolog OS=Mus musculus OX=10090 GN=Fmc1 PE=1 SV=1
O88532	ZFR_MOUSE	25.05	16	16	27.509	27.3578	27.3662	27.391	116859	Oxidation (M)	Zinc finger RNA-binding protein OS=Mus musculus OX=10090 GN=Zfr PE=1 SV=2
Q8CD91	SMOC2_MOUSE	21.48	7	7	28.3282	28.7581	27.524	27.9146	49891	Oxidation (M)	SPARC-related modular calcium-binding protein 2 OS=Mus musculus OX=10090 GN=Smoc2 PE=1 SV=1
Q922P8	T132A_MOUSE	5.4	3	3	23.6757	24.0443	23.654	23.6096	110239		Transmembrane protein 132A OS=Mus musculus OX=10090 GN=Tmem132a PE=1 SV=2
Q3TC33	CC127_MOUSE	12.31	2	2	23.5285	23.6649	22.8782	23.6431	30509	Oxidation (M)	Coiled-coil domain-containing protein 127 OS=Mus musculus OX=10090 GN=Ccdc127 PE=1 SV=2
Q9CQP2	TPPC2_MOUSE	10	1	1	24.317	23.9495	24.4738	24.0609	16441	Oxidation (M)	Trafficking protein particle complex subunit 2 OS=Mus musculus OX=10090 GN=Trappc2 PE=1 SV=1
Q5XJY5	COPD_MOUSE	41.68	18	18	29.9259	29.5278	29.6964	29.4214	57229	Oxidation (M)	Coatomer subunit delta OS=Mus musculus OX=10090 GN=Arcn1 PE=1 SV=2
Q91YE6	IPO9_MOUSE	32.18	24	24	29.3536	29.2422	29.4688	29.8415	116052	Acetylation (N-term);NBF;Oxidation (M)	Importin-9 OS=Mus musculus OX=10090 GN=Ipo9 PE=1 SV=3
P84096	RHOG_MOUSE	31.94	4	4	28.0401	28.4274	27.8974	27.7517	21308		Rho-related GTP-binding protein RhoG OS=Mus musculus OX=10090 GN=Rhog PE=1 SV=1
Q9D2G5	SYNJ2_MOUSE	4.18	4	4	23.2443	24.3844	23.7077	24.275	158480	Oxidation (M)	Synaptojanin-2 OS=Mus musculus OX=10090 GN=Synj2 PE=1 SV=2
P09925	SURF1_MOUSE	22.22	4	4	24.3712	25.2643	24.7594	24.1015	34798	Oxidation (M)	Surfeit locus protein 1 OS=Mus musculus OX=10090 GN=Surf1 PE=1 SV=3
P43346	DCK_MOUSE	36.92	8	8	26.7895	25.9912	26.3324	26.8264	30367	Oxidation (M)	Deoxycytidine kinase OS=Mus musculus OX=10090 GN=Dck PE=1 SV=1
P62743	AP2S1_MOUSE	16.2	2	2	27.8019	27.9259	27.5463	27.2262	17018	Oxidation (M)	AP-2 complex subunit sigma OS=Mus musculus OX=10090 GN=Ap2s1 PE=1 SV=1
Q9QXB9	DRG2_MOUSE	35.71	10	10	28.3662	29.4746	28.2714	29.3001	40718	NBF;Oxidation (M)	Developmentally-regulated GTP-binding protein 2 OS=Mus musculus OX=10090 GN=Drg2 PE=1 SV=1
P39876	TIMP3_MOUSE	9.95	2	2	25.1332	24.6375	25.6891	24.8764	24182		Metalloproteinase inhibitor 3 OS=Mus musculus OX=10090 GN=Timp3 PE=1 SV=1
Q01768	NDKB_MOUSE	60.53	11	8	31.5618	31.0217	31.7771	30.7849	17363	Acetylation (N-term);NBF;Oxidation (M)	Nucleoside diphosphate kinase B OS=Mus musculus OX=10090 GN=Nme2 PE=1 SV=1
P58158	B3GA3_MOUSE	11.04	2	2	21.5829	22.1744	21.9862	22.4827	37067		Galactosylgalactosylxylosylprotein 3-beta-glucuronosyltransferase 3 OS=Mus musculus OX=10090 GN=B3gat3 PE=1 SV=1
Q9Z103	ADNP_MOUSE	16.79	14	14	25.918	27.604	26.3511	26.5565	124308	Acetylation (N-term);Oxidation (M)	Activity-dependent neuroprotector homeobox protein OS=Mus musculus OX=10090 GN=Adnp PE=1 SV=2
Q9WV89	STXB4_MOUSE	4.85	2	2	22.112	22.7559	22.5707	23.5983	61689		Syntaxin-binding protein 4 OS=Mus musculus OX=10090 GN=Stxbp4 PE=1 SV=1
Q9CR16	PPID_MOUSE	54.32	17	17	30.6198	30.8901	30.8974	30.8157	40743	Oxidation (M)	Peptidyl-prolyl cis-trans isomerase D OS=Mus musculus OX=10090 GN=Ppid PE=1 SV=3
Q9CQL7	MOFA1_MOUSE	61.6	4	4	26.6595	26.5135	26.0338	25.7594	14194	Oxidation (M)	MORF4 family-associated protein 1 OS=Mus musculus OX=10090 GN=Mrfap1 PE=1 SV=1
O70325	GPX4_MOUSE	13.2	2	2	24.8191	25.4457	24.4614	24.8093	22198	Oxidation (M)	Phospholipid hydroperoxide glutathione peroxidase OS=Mus musculus OX=10090 GN=Gpx4 PE=1 SV=4
Q5U5Q9	UIMC1_MOUSE	4.95	2	2	21.4539	23.1321	21.5582	19.5548	81478		BRCA1-A complex subunit RAP80 OS=Mus musculus OX=10090 GN=Uimc1 PE=1 SV=2
Q8BMQ8	MON1B_MOUSE	4.52	1	1	22.7101	22.8849	22.5767	23.3778	60016	Acetylation (N-term);Oxidation (M)	Vacuolar fusion protein MON1 homolog B OS=Mus musculus OX=10090 GN=Mon1b PE=2 SV=1
Q922J3	CLIP1_MOUSE	27.89	29	27	27.391	27.7195	26.8974	27.019	155814	Oxidation (M)	CAP-Gly domain-containing linker protein 1 OS=Mus musculus OX=10090 GN=Clip1 PE=1 SV=1
Q3UU96	MRCKA_MOUSE	7.97	10	9	25.141	26.189	25.1293	25.4707	195536		Serine/threonine-protein kinase MRCK alpha OS=Mus musculus OX=10090 GN=Cdc42bpa PE=1 SV=2
Q8CGK3	LONM_MOUSE	38.67	20	20	28.9372	28.6998	28.7227	28.5898	105843	Oxidation (M)	Lon protease homolog, mitochondrial OS=Mus musculus OX=10090 GN=Lonp1 PE=1 SV=2
Q9D051	ODPB_MOUSE	41.5	11	11	29.4649	29.7276	29.4413	29.4274	38937	Oxidation (M)	Pyruvate dehydrogenase E1 component subunit beta, mitochondrial OS=Mus musculus OX=10090 GN=Pdhb PE=1 SV=1
E9Q912	GDS1_MOUSE	31.8	16	16	28.9287	29.2692	28.7162	29.3282	66076	Acetylation (N-term);Oxidation (M)	Rap1 GTPase-GDP dissociation stimulator 1 OS=Mus musculus OX=10090 GN=Rap1gds1 PE=2 SV=1
Q9ESD7	DYSF_MOUSE	4.88	9	8	27.0813	25.1174	25.0935	24.9584	237911		Dysferlin OS=Mus musculus OX=10090 GN=Dysf PE=1 SV=3
Q8K1E0	STX5_MOUSE	24.23	5	5	27.4234	27.8142	27.3745	27.7895	39713		Syntaxin-5 OS=Mus musculus OX=10090 GN=Stx5 PE=1 SV=3
Q9ER41	TOR1B_MOUSE	18.45	4	4	26.2426	26.2151	26.0813	26.452	37818	Oxidation (M)	Torsin-1B OS=Mus musculus OX=10090 GN=Tor1b PE=1 SV=2
P53811	PIPNB_MOUSE	29.89	7	6	27.8264	27.976	27.3239	27.5754	31487	Oxidation (M)	Phosphatidylinositol transfer protein beta isoform OS=Mus musculus OX=10090 GN=Pitpnb PE=1 SV=2
Q99LJ0	CT2NL_MOUSE	30.72	14	14	26.3444	27.17	26.0588	26.8264	69841	Oxidation (M)	CTTNBP2 N-terminal-like protein OS=Mus musculus OX=10090 GN=Cttnbp2nl PE=1 SV=1
Q6NXW6	RAD17_MOUSE	2.91	2	2	22.9882	22.851	21.9678	23.1717	77391		Cell cycle checkpoint protein RAD17 OS=Mus musculus OX=10090 GN=Rad17 PE=1 SV=2
A2ALU4	SHRM2_MOUSE	8.51	7	7	24.0359	24.7895	23.417	23.7286	164703	Oxidation (M)	Protein Shroom2 OS=Mus musculus OX=10090 GN=Shroom2 PE=1 SV=1
Q07113	MPRI_MOUSE	9.1	17	17	28.2077	27.9088	27.5898	27.8682	273815	Acetylation (N-term);Oxidation (M)	Cation-independent mannose-6-phosphate receptor OS=Mus musculus OX=10090 GN=Igf2r PE=1 SV=1
Q8R050	ERF3A_MOUSE	13.21	14	6	29.027	28.9428	29.1312	29.4053	68625	Acetylation (N-term);Oxidation (M)	Eukaryotic peptide chain release factor GTP-binding subunit ERF3A OS=Mus musculus OX=10090 GN=Gspt1 PE=1 SV=2
Q60875	ARHG2_MOUSE	26.8	17	17	28.2399	27.8324	27.4394	27.9203	111974	Oxidation (M)	Rho guanine nucleotide exchange factor 2 OS=Mus musculus OX=10090 GN=Arhgef2 PE=1 SV=4
Q80UG8	TTLL4_MOUSE	1.17	1	1	19.2895	22.0177	20.1256	21.2074	132530		Tubulin polyglutamylase TTLL4 OS=Mus musculus OX=10090 GN=Ttll4 PE=1 SV=3
Q7TSZ8	NACC1_MOUSE	9.34	4	4	26.4598	26.9428	26.2353	26.7517	56537		Nucleus accumbens-associated protein 1 OS=Mus musculus OX=10090 GN=Nacc1 PE=1 SV=1
P84099	RL19_MOUSE	26.53	7	7	31.1783	31.2869	31.1901	30.7613	23466	Acetylation (N-term);NBF;Oxidation (M)	60S ribosomal protein L19 OS=Mus musculus OX=10090 GN=Rpl19 PE=1 SV=1
Q8R0A0	T2FB_MOUSE	24.9	5	5	28.5463	29.1337	28.203	29.2353	28381		General transcription factor IIF subunit 2 OS=Mus musculus OX=10090 GN=Gtf2f2 PE=1 SV=1
O70152	DPM1_MOUSE	53.46	9	9	27.8324	27.8019	26.9316	27.5165	29175	Oxidation (M)	Dolichol-phosphate mannosyltransferase subunit 1 OS=Mus musculus OX=10090 GN=Dpm1 PE=1 SV=1
Q9Z1X9	CDC45_MOUSE	3	1	1	23.3376	23.1389	23.1401	23.1921	65384		Cell division control protein 45 homolog OS=Mus musculus OX=10090 GN=Cdc45 PE=1 SV=2
Q8BX13	UBE3D_MOUSE	3.53	1	1	21.4515	20.5483	19.9526	19.835	40753	Oxidation (M)	E3 ubiquitin-protein ligase E3D OS=Mus musculus OX=10090 GN=Ube3d PE=2 SV=1
Q9CQJ2	PIHD1_MOUSE	31.38	6	6	26.632	27.3745	27.0914	27.019	32209	Acetylation (N-term);Oxidation (M)	PIH1 domain-containing protein 1 OS=Mus musculus OX=10090 GN=Pih1d1 PE=1 SV=1
Q8K3K7	PLCB_MOUSE	6.12	1	1	22.167	23.2121	22.4953	22.7357	31011		1-acyl-sn-glycerol-3-phosphate acyltransferase beta OS=Mus musculus OX=10090 GN=Agpat2 PE=1 SV=1
P28867	KPCD_MOUSE	6.23	3	3	26.4186	25.9383	26.7895	26.9203	77547		Protein kinase C delta type OS=Mus musculus OX=10090 GN=Prkcd PE=1 SV=3
C0HKE1	H2A1B_MOUSE	28.46	9	3	27.4551	29.6407	26.8264	28.9512	14135	NBF	Histone H2A type 1-B OS=Mus musculus OX=10090 GN=H2ac4 PE=1 SV=1
Q80U16	RIPR2_MOUSE	2.41	2	2	21.6453	21.4881	21.04	20.6617	118970		Rho family-interacting cell polarization regulator 2 OS=Mus musculus OX=10090 GN=Ripor2 PE=1 SV=2
Q3ULW8	PARP3_MOUSE	15.38	6	6	26.9869	27.189	26.5478	27.2979	59949	Oxidation (M)	Protein mono-ADP-ribosyltransferase PARP3 OS=Mus musculus OX=10090 GN=Parp3 PE=2 SV=1
Q8CD26	S35E1_MOUSE	15.4	3	3	25.4425	26.3359	25.6838	26.604	44325	Acetylation (N-term);Oxidation (M)	Solute carrier family 35 member E1 OS=Mus musculus OX=10090 GN=Slc35e1 PE=1 SV=2
Q7TPR4	ACTN1_MOUSE	49.44	58	34	32.881	32.966	32.3463	32.6692	103068	Acetylation (N-term);NBF;Oxidation (M)	Alpha-actinin-1 OS=Mus musculus OX=10090 GN=Actn1 PE=1 SV=1
P17809	GTR1_MOUSE	8.54	4	4	30.2647	31.0084	29.8593	30.6881	53985	Oxidation (M)	Solute carrier family 2, facilitated glucose transporter member 1 OS=Mus musculus OX=10090 GN=Slc2a1 PE=1 SV=4
Q9D2I5	ARMC9_MOUSE	1.84	1	1	20.7822	20.7586	21.1514	21.3692	91922	Acetylation (N-term)	LisH domain-containing protein ARMC9 OS=Mus musculus OX=10090 GN=Armc9 PE=1 SV=1
Q9R0Q6	ARC1A_MOUSE	7.84	2	2	22.6313	22.9986	23.8191	20.5112	41626		Actin-related protein 2/3 complex subunit 1A OS=Mus musculus OX=10090 GN=Arpc1a PE=1 SV=1
Q8R2M2	TDIF2_MOUSE	20.58	12	12	28.217	28.0711	27.1115	28.267	84277	Oxidation (M)	Deoxynucleotidyltransferase terminal-interacting protein 2 OS=Mus musculus OX=10090 GN=Dnttip2 PE=1 SV=1
Q8VCB1	NDC1_MOUSE	18.28	8	8	27.611	27.141	27.1312	27.5014	75409	Acetylation (N-term);Oxidation (M)	Nucleoporin NDC1 OS=Mus musculus OX=10090 GN=Ndc1 PE=1 SV=1
Q8BPM0	DAAM1_MOUSE	6.13	5	5	24.1095	24.5285	23.7492	23.8191	123370	Oxidation (M)	Disheveled-associated activator of morphogenesis 1 OS=Mus musculus OX=10090 GN=Daam1 PE=1 SV=4
Q8BVE8	NSD2_MOUSE	8.57	6	6	26.2643	26.4041	25.705	25.9716	152253	Oxidation (M)	Histone-lysine N-methyltransferase NSD2 OS=Mus musculus OX=10090 GN=Nsd2 PE=1 SV=2
P17183	ENOG_MOUSE	8.99	5	2	25.7594	24.945	25.1174	25.2856	47297	Acetylation (N-term)	Gamma-enolase OS=Mus musculus OX=10090 GN=Eno2 PE=1 SV=2
P57716	NICA_MOUSE	20.06	10	10	28.6181	29.0111	27.4938	29.1288	78492	Oxidation (M)	Nicastrin OS=Mus musculus OX=10090 GN=Ncstn PE=1 SV=3
Q8VEH8	ERLEC_MOUSE	2.69	1	1	23.0162	23.4298	22.6489	24.3645	54906		Endoplasmic reticulum lectin 1 OS=Mus musculus OX=10090 GN=Erlec1 PE=1 SV=1
P54818	GALC_MOUSE	5.12	2	2	23.1769	23.8576	23.1259	23.5285	77256		Galactocerebrosidase OS=Mus musculus OX=10090 GN=Galc PE=1 SV=2
O55047	TLK2_MOUSE	3.9	3	2	20.9463	21.4509	21.178	21.159	82261		Serine/threonine-protein kinase tousled-like 2 OS=Mus musculus OX=10090 GN=Tlk2 PE=1 SV=2
Q922P9	GLYR1_MOUSE	17.22	5	5	26.4953	26.9203	26.2785	26.9869	59716	Oxidation (M)	Putative oxidoreductase GLYR1 OS=Mus musculus OX=10090 GN=Glyr1 PE=1 SV=1
Q924M7	MPI_MOUSE	20.57	5	5	27.2625	27.1115	26.5345	26.6998	46575	Oxidation (M)	Mannose-6-phosphate isomerase OS=Mus musculus OX=10090 GN=Mpi PE=1 SV=1
Q9D0N7	CAF1B_MOUSE	15.73	7	7	27.2535	27.6663	26.965	27.4473	63132	Oxidation (M)	Chromatin assembly factor 1 subunit B OS=Mus musculus OX=10090 GN=Chaf1b PE=1 SV=1
Q6ZWV7	RL35_MOUSE	27.64	4	4	30.5933	30.2193	29.995	30.5109	14553	NBF	60S ribosomal protein L35 OS=Mus musculus OX=10090 GN=Rpl35 PE=1 SV=1
Q6ZPK0	PF21A_MOUSE	2.33	1	1	22.0444	22.3456	20.6226	21.6813	75597		PHD finger protein 21A OS=Mus musculus OX=10090 GN=Phf21a PE=1 SV=3
Q6IFX2	K1C42_MOUSE	4.65	7	2	26.8385	27.8445	25.3578	26.7895	50133		Keratin, type I cytoskeletal 42 OS=Mus musculus OX=10090 GN=Krt42 PE=1 SV=1
O09159	MA2B1_MOUSE	13.43	9	9	25.239	27.1984	25.9933	26.965	114648	Oxidation (M)	Lysosomal alpha-mannosidase OS=Mus musculus OX=10090 GN=Man2b1 PE=1 SV=4
Q3UI43	BABA1_MOUSE	24.02	3	3	25.1604	24.7945	25.5522	25.0772	36793		BRISC and BRCA1-A complex member 1 OS=Mus musculus OX=10090 GN=Babam1 PE=1 SV=1
Q6ZQK5	ACAP2_MOUSE	17.01	8	8	25.8647	26.1507	25.4676	25.5926	87211		Arf-GAP with coiled-coil, ANK repeat and PH domain-containing protein 2 OS=Mus musculus OX=10090 GN=Acap2 PE=1 SV=2
Q9CPR1	RWDD4_MOUSE	12.77	2	2	24.867	25.0443	26.5682	25.4008	21138	Acetylation (N-term);Oxidation (M)	RWD domain-containing protein 4 OS=Mus musculus OX=10090 GN=Rwdd4 PE=2 SV=1
Q91ZS8	RED1_MOUSE	19.41	8	8	24.8385	25.4923	24.7543	25.4892	78001	Acetylation (N-term);Oxidation (M)	Double-stranded RNA-specific editase 1 OS=Mus musculus OX=10090 GN=Adarb1 PE=1 SV=1
P53996	CNBP_MOUSE	8.43	1	1	20.3718	19.6144	21.4581	NaN	19592	NBF	Cellular nucleic acid-binding protein OS=Mus musculus OX=10090 GN=Cnbp PE=1 SV=2
Q8BT14	CNOT4_MOUSE	5.74	2	2	25.9562	25.8858	25.6096	24.9584	63474		CCR4-NOT transcription complex subunit 4 OS=Mus musculus OX=10090 GN=Cnot4 PE=1 SV=2
Q62407	SPEG_MOUSE	0.43	1	1	20.9051	21.0969	20.4856	21.2998	354343		Striated muscle-specific serine/threonine-protein kinase OS=Mus musculus OX=10090 GN=Speg PE=1 SV=2
A2A791	ZMYM4_MOUSE	9.1	10	10	24.8717	25.1719	24.8093	25.0772	172438	Oxidation (M)	Zinc finger MYM-type protein 4 OS=Mus musculus OX=10090 GN=Zmym4 PE=1 SV=1
Q3U2I3	FHI1B_MOUSE	6.77	3	3	25.341	26.7895	23.632	24.6431	106541	Acetylation (N-term);NBF	FHF complex subunit HOOK interacting protein 1B OS=Mus musculus OX=10090 GN=Fhip1b PE=1 SV=2
Q3U2P1	SC24A_MOUSE	24.4	18	18	26.632	27.3828	26.1965	26.965	118782	Acetylation (N-term);Oxidation (M)	Protein transport protein Sec24A OS=Mus musculus OX=10090 GN=Sec24a PE=1 SV=1
Q9R0E1	PLOD3_MOUSE	46.02	25	24	29.7292	30.3828	29.4995	30.1361	84922	Oxidation (M)	Multifunctional procollagen lysine hydroxylase and glycosyltransferase LH3 OS=Mus musculus OX=10090 GN=Plod3 PE=1 SV=1
Q8BG15	CTSL2_MOUSE	6.24	2	2	25.1015	25.8312	24.6649	25.2571	52813		CTD small phosphatase-like protein 2 OS=Mus musculus OX=10090 GN=Ctdspl2 PE=1 SV=1
Q9WVA3	BUB3_MOUSE	29.14	7	7	29.995	29.9539	29.5128	29.7309	36955	Oxidation (M)	Mitotic checkpoint protein BUB3 OS=Mus musculus OX=10090 GN=Bub3 PE=1 SV=2
Q8N7N5	DCAF8_MOUSE	15.4	6	6	24.4234	24.8191	25.7568	28.362	66031	Oxidation (M)	DDB1- and CUL4-associated factor 8 OS=Mus musculus OX=10090 GN=Dcaf8 PE=1 SV=1
Q99L28	RLP24_MOUSE	7.36	1	1	26.1623	25.7895	25.8167	25.6568	19611		Probable ribosome biogenesis protein RLP24 OS=Mus musculus OX=10090 GN=Rsl24d1 PE=2 SV=1
P62821	RAB1A_MOUSE	26.34	5	3	30.94	31.0217	30.8004	30.9882	22678	Oxidation (M)	Ras-related protein Rab-1A OS=Mus musculus OX=10090 GN=Rab1A PE=1 SV=3
Q5SQM0	EMAL6_MOUSE	0.77	1	1	26.4769	28.1795	26.4154	27.611	217941	Acetylation (N-term)	Echinoderm microtubule-associated protein-like 6 OS=Mus musculus OX=10090 GN=Eml6 PE=2 SV=1
Q6PD03	2A5A_MOUSE	5.76	2	2	24.4862	23.632	22.6371	22.9984	56347		Serine/threonine-protein phosphatase 2A 56 kDa regulatory subunit alpha isoform OS=Mus musculus OX=10090 GN=Ppp2r5a PE=1 SV=1
Q61749	EI2BD_MOUSE	30.34	13	13	27.9088	28.4473	27.5898	28.3239	57624	Acetylation (N-term);Oxidation (M)	Translation initiation factor eIF-2B subunit delta OS=Mus musculus OX=10090 GN=Eif2b4 PE=1 SV=2
Q8BJQ2	UBP1_MOUSE	8.8	5	5	23.7796	24.019	22.7681	22.8537	87456	Oxidation (M)	Ubiquitin carboxyl-terminal hydrolase 1 OS=Mus musculus OX=10090 GN=Usp1 PE=1 SV=1
Q9Z1S0	BUB1B_MOUSE	19.87	15	15	26.2696	26.7517	25.9383	26.4346	118392		Mitotic checkpoint serine/threonine-protein kinase BUB1 beta OS=Mus musculus OX=10090 GN=Bub1b PE=1 SV=2
P07310	KCRM_MOUSE	11.81	3	3	25.0609	25.4645	26.1852	25.0233	43045		Creatine kinase M-type OS=Mus musculus OX=10090 GN=Ckm PE=1 SV=1
Q9CXF7	CHD1L_MOUSE	5	3	3	23.7492	24.0854	23.4551	24.4488	101438	Oxidation (M)	Chromodomain-helicase-DNA-binding protein 1-like OS=Mus musculus OX=10090 GN=Chd1l PE=1 SV=1
Q6PCZ4	MAGE1_MOUSE	5.56	3	3	22.3714	23.6757	23.3239	22.6495	101632	Oxidation (M)	Melanoma-associated antigen E1 OS=Mus musculus OX=10090 GN=Magee1 PE=1 SV=1
Q9DBR4	APBB2_MOUSE	3.29	2	2	21.406	22.7683	22.4382	23.0722	83201		Amyloid-beta A4 precursor protein-binding family B member 2 OS=Mus musculus OX=10090 GN=Apbb2 PE=1 SV=2
Q921L5	COG2_MOUSE	30.92	15	15	26.0995	26.726	26.3135	26.3795	82040	Oxidation (M)	Conserved oligomeric Golgi complex subunit 2 OS=Mus musculus OX=10090 GN=Cog2 PE=1 SV=2
Q9D2V7	CORO7_MOUSE	15.94	7	7	24.4041	25.1527	25.141	25.002	100812	Oxidation (M)	Coronin-7 OS=Mus musculus OX=10090 GN=Coro7 PE=1 SV=2
Q3U0M1	TPPC9_MOUSE	2.26	2	2	21.4168	22.0957	22.1122	22.2261	128232		Trafficking protein particle complex subunit 9 OS=Mus musculus OX=10090 GN=Trappc9 PE=1 SV=2
P52760	RIDA_MOUSE	29.63	3	3	25.8361	26.5898	26.1391	26.5389	14255		2-iminobutanoate/2-iminopropanoate deaminase OS=Mus musculus OX=10090 GN=Rida PE=1 SV=3
P56546	CTBP2_MOUSE	17.75	7	6	27.1795	27.4314	27.0711	27.3578	48957	Oxidation (M)	C-terminal-binding protein 2 OS=Mus musculus OX=10090 GN=Ctbp2 PE=1 SV=2
P62717	RL18A_MOUSE	22.73	5	5	28.141	27.6389	28.3869	27.9428	20732	NBF;Oxidation (M)	60S ribosomal protein L18a OS=Mus musculus OX=10090 GN=Rpl18a PE=1 SV=1
Q9D3D9	ATPD_MOUSE	13.69	2	2	29.4413	29.6713	28.4629	28.8445	17600		ATP synthase subunit delta, mitochondrial OS=Mus musculus OX=10090 GN=Atp5f1d PE=1 SV=1
Q5FWK3	RHG01_MOUSE	35.99	10	10	29.1239	28.9787	29.3174	29.0479	50411	Acetylation (N-term);Oxidation (M)	Rho GTPase-activating protein 1 OS=Mus musculus OX=10090 GN=Arhgap1 PE=1 SV=1
Q91XD6	VPS36_MOUSE	18.91	6	6	26.4738	26.1035	25.726	25.9584	43736	Oxidation (M)	Vacuolar protein-sorting-associated protein 36 OS=Mus musculus OX=10090 GN=Vps36 PE=1 SV=1
Q7TSI3	PP6R1_MOUSE	18.93	10	9	25.9293	25.019	25.6998	24.7645	94527	Oxidation (M)	Serine/threonine-protein phosphatase 6 regulatory subunit 1 OS=Mus musculus OX=10090 GN=Ppp6r1 PE=1 SV=1
Q9WTK2	CDYL_MOUSE	5.06	2	2	23.0436	23.417	22.5201	22.5706	65211	Oxidation (M)	Chromodomain Y-like protein OS=Mus musculus OX=10090 GN=Cdyl PE=1 SV=1
O35326	SRSF5_MOUSE	19.7	6	5	29.0813	29.8653	29.1214	29.5444	30891		Serine/arginine-rich splicing factor 5 OS=Mus musculus OX=10090 GN=Srsf5 PE=1 SV=2
Q8BTW3	EXOS6_MOUSE	47.62	10	10	28.3951	29.1819	28.1556	28.8173	28370	Acetylation (N-term);NBF;Oxidation (M)	Exosome complex component MTR3 OS=Mus musculus OX=10090 GN=Exosc6 PE=1 SV=1
P42669	PURA_MOUSE	39.56	7	7	28.8264	29.1866	28.8264	29.0479	34884	NBF	Transcriptional activator protein Pur-alpha OS=Mus musculus OX=10090 GN=Pura PE=1 SV=1
Q9D6J5	NDUB8_MOUSE	20.97	2	2	25.7619	25.7208	25.4831	26.1371	21876	Oxidation (M)	NADH dehydrogenase [ubiquinone] 1 beta subcomplex subunit 8, mitochondrial OS=Mus musculus OX=10090 GN=Ndufb8 PE=1 SV=1
Q9JLG8	CAN15_MOUSE	5.11	3	3	22.3549	21.8419	22.1369	22.6665	118719	Oxidation (M)	Calpain-15 OS=Mus musculus OX=10090 GN=Capn15 PE=1 SV=1
Q04750	TOP1_MOUSE	20.6	11	11	30.0349	29.0839	29.3388	28.7739	90876	Acetylation (N-term);Oxidation (M)	DNA topoisomerase 1 OS=Mus musculus OX=10090 GN=Top1 PE=1 SV=2
Q9QY76	VAPB_MOUSE	17.7	5	4	28.7486	28.8711	28.4512	28.6764	26946	Oxidation (M)	Vesicle-associated membrane protein-associated protein B OS=Mus musculus OX=10090 GN=Vapb PE=1 SV=3
Q8CCS6	PABP2_MOUSE	29.47	6	6	30.6372	30.5389	29.846	30.7211	32297	Acetylation (N-term);Oxidation (M)	Polyadenylate-binding protein 2 OS=Mus musculus OX=10090 GN=Pabpn1 PE=1 SV=3
O35593	PSDE_MOUSE	42.58	8	8	29.6798	30.2535	29.5916	30.2077	34577	Oxidation (M)	26S proteasome non-ATPase regulatory subunit 14 OS=Mus musculus OX=10090 GN=Psmd14 PE=1 SV=2
Q9QWL7	K1C17_MOUSE	2.31	7	1	22.4394	23.6431	20.6763	21.1782	48162		Keratin, type I cytoskeletal 17 OS=Mus musculus OX=10090 GN=Krt17 PE=1 SV=3
Q9JIG8	PRAF2_MOUSE	22.47	3	3	28.4032	29.8887	28.1312	29.1288	19478	Oxidation (M)	PRA1 family protein 2 OS=Mus musculus OX=10090 GN=Praf2 PE=1 SV=1
Q9CXJ1	SYEM_MOUSE	5.74	2	2	23.1535	24.5285	22.9204	24.5045	58326		Probable glutamate--tRNA ligase, mitochondrial OS=Mus musculus OX=10090 GN=Ears2 PE=1 SV=1
Q5PR69	CRACD_MOUSE	1.16	1	1	19.8247	20.3875	17.7275	18.4197	132286		Capping protein-inhibiting regulator of actin dynamics OS=Mus musculus OX=10090 GN=Cracd PE=1 SV=3
O88329	MYO1A_MOUSE	1.44	2	1	22.3475	25.0317	24.3444	27.0813	118695		Unconventional myosin-Ia OS=Mus musculus OX=10090 GN=Myo1a PE=2 SV=2
P70296	PEBP1_MOUSE	64.17	7	7	32.3828	32.2507	31.978	31.9117	20830	Acetylation (N-term);NBF;Oxidation (M)	Phosphatidylethanolamine-binding protein 1 OS=Mus musculus OX=10090 GN=Pebp1 PE=1 SV=3
Q91WK5	GCSH_MOUSE	11.76	1	1	24.6486	23.4425	22.3595	22.6481	18637	Oxidation (M)	Glycine cleavage system H protein, mitochondrial OS=Mus musculus OX=10090 GN=Gcsh PE=1 SV=2
Q8VCQ6	SMS1_MOUSE	3.82	1	1	21.3585	21.1267	21.7868	21.3257	49317		Phosphatidylcholine:ceramide cholinephosphotransferase 1 OS=Mus musculus OX=10090 GN=Sgms1 PE=1 SV=2
Q9D924	ISCA1_MOUSE	19.38	2	2	22.2798	21.9348	22.4345	22.1452	14188		Iron-sulfur cluster assembly 1 homolog, mitochondrial OS=Mus musculus OX=10090 GN=Isca1 PE=2 SV=1
Q8C0L0	TMX4_MOUSE	13.43	3	3	26.0212	26.2589	25.6153	26.2077	37131		Thioredoxin-related transmembrane protein 4 OS=Mus musculus OX=10090 GN=Tmx4 PE=1 SV=2
Q3TUF7	YETS2_MOUSE	9.81	8	8	23.0797	23.5404	23.0102	23.6096	148950		YEATS domain-containing protein 2 OS=Mus musculus OX=10090 GN=Yeats2 PE=1 SV=2
Q8BVY0	RL1D1_MOUSE	43.36	15	15	30.8608	30.2869	30.7692	30.1361	50421	NBF;Oxidation (M)	Ribosomal L1 domain-containing protein 1 OS=Mus musculus OX=10090 GN=Rsl1d1 PE=1 SV=1
Q78S06	SYS1_MOUSE	14.1	1	1	21.5461	22.0471	20.7205	23.3376	17554	Oxidation (M)	Protein SYS1 homolog OS=Mus musculus OX=10090 GN=Sys1 PE=2 SV=1
B1AXP6	TOM5_MOUSE	19.61	1	1	24.2679	25.1833	23.9584	24.4676	6037	Oxidation (M)	Mitochondrial import receptor subunit TOM5 homolog OS=Mus musculus OX=10090 GN=Tomm5 PE=3 SV=1
P63034	CYH2_MOUSE	7.5	5	2	24.3645	25.0233	24.019	25.1984	46585	Acetylation (N-term);Oxidation (M)	Cytohesin-2 OS=Mus musculus OX=10090 GN=Cyth2 PE=1 SV=2
Q9Z0Z7	KLF5_MOUSE	9.87	3	3	22.7012	24.1253	24.3101	24.1015	49754		Krueppel-like factor 5 OS=Mus musculus OX=10090 GN=Klf5 PE=1 SV=2
Q8BUY9	PGTB1_MOUSE	2.65	1	1	21.0763	20.9913	20.7163	20.8676	42354		Geranylgeranyl transferase type-1 subunit beta OS=Mus musculus OX=10090 GN=Pggt1b PE=1 SV=1
Q9D5T0	ATAD1_MOUSE	24.93	6	6	26.5898	27.9259	26.2151	27.1312	40744	Oxidation (M)	Outer mitochondrial transmembrane helix translocase OS=Mus musculus OX=10090 GN=Atad1 PE=1 SV=1
Q91W39	NCOA5_MOUSE	24.18	9	9	26.1814	27.1015	26.1391	26.604	65319	Oxidation (M)	Nuclear receptor coactivator 5 OS=Mus musculus OX=10090 GN=Ncoa5 PE=1 SV=1
Q80XR2	AT2C1_MOUSE	10.24	6	6	24.4551	23.7796	27.8019	24.2021	100299	Oxidation (M)	Calcium-transporting ATPase type 2C member 1 OS=Mus musculus OX=10090 GN=Atp2c1 PE=1 SV=2
Q80VY9	DHX33_MOUSE	11.6	5	5	27.6663	27.8142	27.4862	27.7389	78347	Oxidation (M)	ATP-dependent RNA helicase DHX33 OS=Mus musculus OX=10090 GN=Dhx33 PE=1 SV=1
Q00547	HMMR_MOUSE	10.2	6	6	25.8997	26.2225	24.8336	28.459	91785	Oxidation (M)	Hyaluronan mediated motility receptor OS=Mus musculus OX=10090 GN=Hmmr PE=1 SV=4
Q8R5H6	WASF1_MOUSE	9.84	4	3	24.1015	24.019	24.5463	25.1604	61509		Wiskott-Aldrich syndrome protein family member 1 OS=Mus musculus OX=10090 GN=Wasf1 PE=1 SV=2
Q3U1V6	UEVLD_MOUSE	13.38	4	4	24.3307	25.1214	24.3712	24.217	51681		Ubiquitin-conjugating enzyme E2 variant 3 OS=Mus musculus OX=10090 GN=Uevld PE=1 SV=1
Q8VDF2	UHRF1_MOUSE	32.61	17	17	28.217	27.7581	27.7453	27.7958	88304	Oxidation (M)	E3 ubiquitin-protein ligase UHRF1 OS=Mus musculus OX=10090 GN=Uhrf1 PE=1 SV=2
Q8BY87	UBP47_MOUSE	23.55	21	21	27.4785	27.8623	27.3239	27.6181	157455	Oxidation (M)	Ubiquitin carboxyl-terminal hydrolase 47 OS=Mus musculus OX=10090 GN=Usp47 PE=1 SV=2
Q9CY64	BIEA_MOUSE	46.1	11	11	28.3324	28.7988	28.2979	28.604	33525	Oxidation (M)	Biliverdin reductase A OS=Mus musculus OX=10090 GN=Blvra PE=1 SV=1
Q80VQ1	LRRC1_MOUSE	12.79	5	4	23.848	22.9026	23.8385	23.5165	59412	Oxidation (M)	Leucine-rich repeat-containing protein 1 OS=Mus musculus OX=10090 GN=Lrrc1 PE=1 SV=2
Q8C650	SEP10_MOUSE	13.5	4	4	25.6403	26.3014	25.4234	25.8433	52422	Oxidation (M)	Septin-10 OS=Mus musculus OX=10090 GN=Septin10 PE=1 SV=1
Q9D7N3	RT09_MOUSE	22.82	7	7	27.6998	28.3023	27.5826	27.7325	44929	Oxidation (M)	28S ribosomal protein S9, mitochondrial OS=Mus musculus OX=10090 GN=Mrps9 PE=1 SV=3
O88693	CEGT_MOUSE	3.3	1	1	19.8073	NaN	19.8911	20.8302	44839		Ceramide glucosyltransferase OS=Mus musculus OX=10090 GN=Ugcg PE=1 SV=1
Q9JIQ3	DBLOH_MOUSE	38.82	5	5	25.8974	26.4598	25.7312	26.141	26820	Oxidation (M)	Diablo homolog, mitochondrial OS=Mus musculus OX=10090 GN=Diablo PE=1 SV=2
F8VPZ9	BICRA_MOUSE	2.47	2	2	22.1781	21.1896	22.3399	21.9545	161354	Oxidation (M)	BRD4-interacting chromatin-remodeling complex-associated protein OS=Mus musculus OX=10090 GN=Bicra PE=1 SV=1
Q689Z5	SBNO1_MOUSE	20.07	20	16	26.5696	26.9428	27.8142	26.726	153738	Oxidation (M)	Protein strawberry notch homolog 1 OS=Mus musculus OX=10090 GN=Sbno1 PE=1 SV=2
Q5F2E8	TAOK1_MOUSE	8.29	7	7	25.2856	25.4425	25.1293	25.217	116050	Oxidation (M)	Serine/threonine-protein kinase TAO1 OS=Mus musculus OX=10090 GN=Taok1 PE=1 SV=1
Q8VEB4	PAG15_MOUSE	11.17	3	3	26.2114	26.7895	26.0084	26.6595	47307	Oxidation (M)	Phospholipase A2 group XV OS=Mus musculus OX=10090 GN=Pla2g15 PE=1 SV=1
Q04998	INHBA_MOUSE	12.03	3	3	22.6571	23.654	23.4923	22.9737	47392	Oxidation (M)	Inhibin beta A chain OS=Mus musculus OX=10090 GN=Inhba PE=1 SV=1
Q9JL19	NCOA6_MOUSE	2.13	2	2	22.3377	20.8418	21.7765	NaN	219663		Nuclear receptor coactivator 6 OS=Mus musculus OX=10090 GN=Ncoa6 PE=1 SV=1
Q3UYI5	RGL3_MOUSE	12.41	6	6	23.867	24.5463	24.1946	24.7945	77945		Ral guanine nucleotide dissociation stimulator-like 3 OS=Mus musculus OX=10090 GN=Rgl3 PE=1 SV=2
P60521	GBRL2_MOUSE	23.08	3	3	26.9088	24.4862	24.8576	24.275	13667	Oxidation (M)	Gamma-aminobutyric acid receptor-associated protein-like 2 OS=Mus musculus OX=10090 GN=Gabarapl2 PE=1 SV=1
Q9DCG9	TR112_MOUSE	47.2	5	5	29.2535	29.8203	29.2262	29.5315	14141		Multifunctional methyltransferase subunit TRM112-like protein OS=Mus musculus OX=10090 GN=Trmt112 PE=1 SV=1
P27048	RSMB_MOUSE	22.51	6	4	22.6262	24.7441	21.6536	23.0646	23656	Acetylation (N-term);NBF	Small nuclear ribonucleoprotein-associated protein B OS=Mus musculus OX=10090 GN=Snrpb PE=1 SV=1
Q8BH83	ANKR9_MOUSE	3.99	1	1	20.7895	20.5164	20.1688	20.7198	35513		Ankyrin repeat domain-containing protein 9 OS=Mus musculus OX=10090 GN=Ankrd9 PE=2 SV=1
Q3UFS0	ZY11B_MOUSE	11.56	5	5	24.4298	25.4488	24.7234	25.2133	83991	Oxidation (M)	Protein zyg-11 homolog B OS=Mus musculus OX=10090 GN=Zyg11b PE=1 SV=2
Q8K2Y3	EVA1B_MOUSE	33.54	2	2	21.0913	22.7677	22.964	22.2536	18291		Protein eva-1 homolog B OS=Mus musculus OX=10090 GN=Eva1b PE=1 SV=1
Q9R0N0	GALK1_MOUSE	33.16	8	8	29.6781	30.196	29.196	30.1115	42295	Oxidation (M)	Galactokinase OS=Mus musculus OX=10090 GN=Galk1 PE=1 SV=2
P38060	HMGCL_MOUSE	23.08	5	5	26.5045	27.4707	26.228	27.3324	34239	Oxidation (M)	Hydroxymethylglutaryl-CoA lyase, mitochondrial OS=Mus musculus OX=10090 GN=Hmgcl PE=1 SV=2
Q3UFK8	FRMD8_MOUSE	13.52	3	3	24.2891	25.4892	24.7338	25.2714	51828	Oxidation (M)	FERM domain-containing protein 8 OS=Mus musculus OX=10090 GN=Frmd8 PE=1 SV=2
Q6P9J9	ANO6_MOUSE	11.09	8	8	27.4938	27.7645	27.3662	27.4785	106255	Oxidation (M)	Anoctamin-6 OS=Mus musculus OX=10090 GN=Ano6 PE=1 SV=1
Q99N93	RM16_MOUSE	6.37	1	1	24.9584	23.5638	24.8288	24.2607	28804		39S ribosomal protein L16, mitochondrial OS=Mus musculus OX=10090 GN=Mrpl16 PE=1 SV=1
Q9QXD8	LIMD1_MOUSE	12.43	4	4	24.5105	22.2905	24.3778	22.997	71422		LIM domain-containing protein 1 OS=Mus musculus OX=10090 GN=Limd1 PE=1 SV=2
Q9DC29	ABCB6_MOUSE	6.29	3	3	23.3511	23.5638	23.2821	24.0691	93770		ATP-binding cassette sub-family B member 6 OS=Mus musculus OX=10090 GN=Abcb6 PE=1 SV=1
Q9D162	CC167_MOUSE	26.8	2	2	24.7543	25.275	24.5696	25.0148	11475		Coiled-coil domain-containing protein 167 OS=Mus musculus OX=10090 GN=Ccdc167 PE=1 SV=2
Q99JR8	SMRD2_MOUSE	19.4	9	7	25.4551	25.9134	25.3239	25.6012	59085	Oxidation (M)	SWI/SNF-related matrix-associated actin-dependent regulator of chromatin subfamily D member 2 OS=Mus musculus OX=10090 GN=Smarcd2 PE=1 SV=2
Q80V86	INT8_MOUSE	6.33	3	3	25.2096	25.2607	24.8764	24.9495	113353		Integrator complex subunit 8 OS=Mus musculus OX=10090 GN=Ints8 PE=1 SV=1
Q91ZW2	OFUT1_MOUSE	14.5	3	3	26.0105	25.3135	26.1293	26.0772	44688		GDP-fucose protein O-fucosyltransferase 1 OS=Mus musculus OX=10090 GN=Pofut1 PE=1 SV=1
Q9CQI6	COTL1_MOUSE	14.08	2	2	25.6264	26.3612	26.2096	26.604	15944		Coactosin-like protein OS=Mus musculus OX=10090 GN=Cotl1 PE=1 SV=3
Q8K2C8	GPAT4_MOUSE	5.7	2	2	21.7723	21.4226	22.2043	21.546	52181		Glycerol-3-phosphate acyltransferase 4 OS=Mus musculus OX=10090 GN=Gpat4 PE=1 SV=1
P30051	TEAD1_MOUSE	7.98	2	2	24.3239	25.0854	24.4425	24.8904	47948	Oxidation (M)	Transcriptional enhancer factor TEF-1 OS=Mus musculus OX=10090 GN=Tead1 PE=1 SV=2
Q8VBZ0	DHRSX_MOUSE	17.61	3	3	21.7146	21.7805	22.8901	22.3928	35957	Oxidation (M)	Dehydrogenase/reductase SDR family member on chromosome X homolog OS=Mus musculus OX=10090 GN=Dhrsx PE=1 SV=2
Q8BGZ4	CDC23_MOUSE	22.78	11	11	27.1015	28.0711	27.3828	27.7517	68562	Oxidation (M)	Cell division cycle protein 23 homolog OS=Mus musculus OX=10090 GN=Cdc23 PE=1 SV=2
P08074	CBR2_MOUSE	29.51	4	4	25.9539	26.524	26.002	26.6865	25958	Oxidation (M)	Carbonyl reductase [NADPH] 2 OS=Mus musculus OX=10090 GN=Cbr2 PE=1 SV=1
Q8R418	DICER_MOUSE	8.46	10	10	24.4551	25.1449	24.3031	24.5869	216821	Oxidation (M)	Endoribonuclease Dicer OS=Mus musculus OX=10090 GN=Dicer1 PE=1 SV=3
Q80UU1	ANKZ1_MOUSE	9.36	4	4	23.8191	24.8044	24.0359	24.5463	82976	Oxidation (M)	Ankyrin repeat and zinc finger domain-containing protein 1 OS=Mus musculus OX=10090 GN=Ankzf1 PE=1 SV=2
Q9R112	SQOR_MOUSE	30.22	10	10	27.2625	28.0965	27.0609	27.7389	50282		Sulfide:quinone oxidoreductase, mitochondrial OS=Mus musculus OX=10090 GN=Sqor PE=1 SV=3
Q6P5C5	SMUG1_MOUSE	13.98	2	2	22.5301	21.1674	23.3376	23.8858	30654		Single-strand selective monofunctional uracil DNA glycosylase OS=Mus musculus OX=10090 GN=Smug1 PE=1 SV=1
Q8BJS8	MTBP_MOUSE	6.26	2	2	22.0154	22.3618	21.6623	20.9442	100314		Mdm2-binding protein OS=Mus musculus OX=10090 GN=Mtbp PE=1 SV=1
Q3UMB5	SMCR8_MOUSE	2.99	2	2	18.704	22.6584	22.2213	22.9707	104957		Guanine nucleotide exchange protein SMCR8 OS=Mus musculus OX=10090 GN=Smcr8 PE=1 SV=2
P32921	SYWC_MOUSE	31.19	10	10	28.4823	28.0711	28.003	27.2535	54358	Oxidation (M)	Tryptophan--tRNA ligase, cytoplasmic OS=Mus musculus OX=10090 GN=Wars1 PE=1 SV=2
P63321	RALA_MOUSE	14.08	6	2	25.7871	25.9628	26.5754	25.4676	23553		Ras-related protein Ral-A OS=Mus musculus OX=10090 GN=Rala PE=1 SV=1
Q9JJK2	LANC2_MOUSE	20.44	6	6	26.6865	27.3662	26.5898	27.1312	50777	Oxidation (M)	LanC-like protein 2 OS=Mus musculus OX=10090 GN=Lancl2 PE=1 SV=1
Q9DBR7	MYPT1_MOUSE	18.56	16	14	28.5014	28.066	28.1312	28.0453	114996	Oxidation (M)	Protein phosphatase 1 regulatory subunit 12A OS=Mus musculus OX=10090 GN=Ppp1r12a PE=1 SV=2
Q9Z0P7	SUFU_MOUSE	9.09	3	3	25.4551	24.0772	25.0732	24.1565	53957	Oxidation (M)	Suppressor of fused homolog OS=Mus musculus OX=10090 GN=Sufu PE=1 SV=1
P70665	SIAE_MOUSE	2.22	1	1	21.8333	22.1687	22.2311	22.128	60775		Sialate O-acetylesterase OS=Mus musculus OX=10090 GN=Siae PE=1 SV=3
Q8R366	IGSF8_MOUSE	8.84	3	3	23.9134	25.2353	23.9672	24.6375	65011		Immunoglobulin superfamily member 8 OS=Mus musculus OX=10090 GN=Igsf8 PE=1 SV=2
Q9CWX2	CIA30_MOUSE	7.62	2	2	23.5404	23.5165	22.5971	23.0399	37810		Complex I intermediate-associated protein 30, mitochondrial OS=Mus musculus OX=10090 GN=Ndufaf1 PE=1 SV=2
P35582	FOXA1_MOUSE	4.27	1	1	21.8573	24.9361	21.6415	24.8288	48854		Hepatocyte nuclear factor 3-alpha OS=Mus musculus OX=10090 GN=Foxa1 PE=1 SV=2
E9PZJ8	ASCC3_MOUSE	6.82	11	11	26.632	27.2353	26.8974	27.1214	250557	Oxidation (M)	Activating signal cointegrator 1 complex subunit 3 OS=Mus musculus OX=10090 GN=Ascc3 PE=1 SV=1
Q3URQ0	TEX10_MOUSE	10.56	7	7	26.5492	27.3494	26.8385	27.6663	105209	Oxidation (M)	Testis-expressed protein 10 OS=Mus musculus OX=10090 GN=Tex10 PE=1 SV=1
Q61699	HS105_MOUSE	41.38	25	25	30.6881	31.1422	30.5389	31.1544	96407	NBF;Oxidation (M)	Heat shock protein 105 kDa OS=Mus musculus OX=10090 GN=Hsph1 PE=1 SV=2
Q99JX1	TAF11_MOUSE	12.8	2	2	21.5009	22.1866	21.6783	22.6795	23333		Transcription initiation factor TFIID subunit 11 OS=Mus musculus OX=10090 GN=Taf11 PE=1 SV=1
Q9WVL2	STAT2_MOUSE	3.79	2	2	22.1891	22.839	22.8927	22.4358	105417		Signal transducer and activator of transcription 2 OS=Mus musculus OX=10090 GN=Stat2 PE=1 SV=1
Q4VBF2	R3HD4_MOUSE	11.83	2	2	22.7403	23.417	22.4584	22.7574	29660	Oxidation (M)	R3H domain-containing protein 4 OS=Mus musculus OX=10090 GN=R3hdm4 PE=2 SV=1
Q8CE96	TRM6_MOUSE	28.77	8	8	26.2481	27.611	26.0084	26.965	55518	Oxidation (M)	tRNA (adenine(58)-N(1))-methyltransferase non-catalytic subunit TRM6 OS=Mus musculus OX=10090 GN=Trmt6 PE=1 SV=1
Q9WU00	NRF1_MOUSE	6.36	2	2	23.4676	22.9174	23.7895	23.5522	53571	Oxidation (M)	Nuclear respiratory factor 1 OS=Mus musculus OX=10090 GN=Nrf1 PE=1 SV=2
Q922H9	ZN330_MOUSE	4.43	1	1	24.0526	24.1795	24.1565	23.8576	35608		Zinc finger protein 330 OS=Mus musculus OX=10090 GN=Znf330 PE=1 SV=1
Q9ER81	IFG15_MOUSE	25.19	2	2	24.019	26.2696	25.5983	26.6181	15278		Torsin-1A-interacting protein 2, isoform IFRG15 OS=Mus musculus OX=10090 GN=Tor1aip2 PE=1 SV=1
Q80UY1	CARME_MOUSE	9	3	3	25.3545	25.8312	25.1757	25.7466	46339		Carnosine N-methyltransferase OS=Mus musculus OX=10090 GN=Carnmt1 PE=1 SV=1
Q9CQV1	TIM16_MOUSE	44	3	3	23.8858	24.7492	24.9361	24.2821	13785	Oxidation (M)	Mitochondrial import inner membrane translocase subunit TIM16 OS=Mus musculus OX=10090 GN=Pam16 PE=1 SV=1
Q61464	ZN638_MOUSE	19.74	21	21	28.0401	29.1312	27.9923	29.4512	218134	Oxidation (M)	Zinc finger protein 638 OS=Mus musculus OX=10090 GN=Znf638 PE=1 SV=2
Q80X82	SYMPK_MOUSE	29.81	25	25	27.0914	27.7453	27.0401	27.4073	142620	Oxidation (M)	Symplekin OS=Mus musculus OX=10090 GN=Sympk PE=1 SV=2
Q8C2E7	WASC5_MOUSE	28.3	23	23	26.9203	27.17	26.4202	27.5536	134110	Oxidation (M)	WASH complex subunit 5 OS=Mus musculus OX=10090 GN=Washc5 PE=1 SV=2
P97478	COQ7_MOUSE	12.44	2	2	24.4105	25.4488	24.1871	23.5522	24042	Oxidation (M)	5-demethoxyubiquinone hydroxylase, mitochondrial OS=Mus musculus OX=10090 GN=Coq7 PE=1 SV=3
Q9WTL7	LYPA2_MOUSE	11.26	1	1	21.1326	20.8533	22.2953	22.4637	24794		Acyl-protein thioesterase 2 OS=Mus musculus OX=10090 GN=Lypla2 PE=1 SV=1
Q8BHZ4	ZN592_MOUSE	1.03	1	1	23.2679	23.9584	23.0487	23.9672	137514		Zinc finger protein 592 OS=Mus musculus OX=10090 GN=Znf592 PE=1 SV=3
Q8JZU2	TXTP_MOUSE	14.47	4	4	26.0975	26.9088	26.217	26.8504	33931	Oxidation (M)	Tricarboxylate transport protein, mitochondrial OS=Mus musculus OX=10090 GN=Slc25a1 PE=1 SV=1
Q9JJ89	CCD86_MOUSE	20.19	7	7	27.2979	26.965	26.8385	26.5711	46487		Coiled-coil domain-containing protein 86 OS=Mus musculus OX=10090 GN=Ccdc86 PE=1 SV=2
P97873	LOXL1_MOUSE	32.62	11	11	29.0839	29.5862	28.6561	29.9677	66506	Oxidation (M)	Lysyl oxidase homolog 1 OS=Mus musculus OX=10090 GN=Loxl1 PE=2 SV=3
P28740	KIF2A_MOUSE	10.21	6	6	27.0401	27.5315	27.019	27.1015	79756	Oxidation (M)	Kinesin-like protein KIF2A OS=Mus musculus OX=10090 GN=Kif2a PE=1 SV=2
Q91W36	UBP3_MOUSE	10.38	4	4	25.2426	25.8927	24.976	25.5551	58868		Ubiquitin carboxyl-terminal hydrolase 3 OS=Mus musculus OX=10090 GN=Usp3 PE=2 SV=1
Q8BMK4	CKAP4_MOUSE	53.04	27	27	31.5014	31.5978	31.5389	31.5014	63692	Acetylation (N-term);Oxidation (M)	Cytoskeleton-associated protein 4 OS=Mus musculus OX=10090 GN=Ckap4 PE=1 SV=2
Q8QZS3	FLCN_MOUSE	2.76	1	1	20.1184	21.2942	20.6098	NaN	64327	Oxidation (M)	Folliculin OS=Mus musculus OX=10090 GN=Flcn PE=1 SV=1
O35566	CD151_MOUSE	5.93	1	1	19.8723	23.3511	20.48	22.4986	28246		CD151 antigen OS=Mus musculus OX=10090 GN=Cd151 PE=1 SV=2
Q99PU7	BAP1_MOUSE	6.18	2	2	20.6259	22.6052	22.1786	21.6922	80492	Oxidation (M)	Ubiquitin carboxyl-terminal hydrolase BAP1 OS=Mus musculus OX=10090 GN=Bap1 PE=1 SV=1
Q6P5E4	UGGG1_MOUSE	46.74	45	45	29.3088	29.461	29.0965	29.1937	176434	Oxidation (M)	UDP-glucose:glycoprotein glucosyltransferase 1 OS=Mus musculus OX=10090 GN=Uggt1 PE=1 SV=4
Q9Z1J3	NFS1_MOUSE	11.33	3	3	25.0401	25.5841	24.867	25.1908	50570	Oxidation (M)	Cysteine desulfurase, mitochondrial OS=Mus musculus OX=10090 GN=Nfs1 PE=1 SV=3
Q04736	YES_MOUSE	13.86	6	4	22.0576	21.2218	24.0275	19.2675	60630	Oxidation (M)	Tyrosine-protein kinase Yes OS=Mus musculus OX=10090 GN=Yes1 PE=1 SV=3
Q99L27	GMPR2_MOUSE	20.11	3	3	26.1757	27.0914	26.2679	26.8504	38019	Oxidation (M)	GMP reductase 2 OS=Mus musculus OX=10090 GN=Gmpr2 PE=1 SV=2
P35980	RL18_MOUSE	42.55	10	10	33.2193	33.2897	32.779	33.1021	21645	NBF	60S ribosomal protein L18 OS=Mus musculus OX=10090 GN=Rpl18 PE=1 SV=3
O89050	MKLN1_MOUSE	22.18	9	9	25.5725	25.0609	25.5812	25.4041	84878	Acetylation (N-term);Oxidation (M)	Muskelin OS=Mus musculus OX=10090 GN=Mkln1 PE=1 SV=1
A2AWA9	RBGP1_MOUSE	13.91	8	8	26.2732	25.3844	25.2856	25.217	120798	Oxidation (M)	Rab GTPase-activating protein 1 OS=Mus musculus OX=10090 GN=Rabgap1 PE=1 SV=1
Q3UHD6	SNX27_MOUSE	30.98	11	11	26.1927	26.2021	25.9869	27.0401	60989	Acetylation (N-term);NBF;Oxidation (M)	Sorting nexin-27 OS=Mus musculus OX=10090 GN=Snx27 PE=1 SV=2
Q5U3K5	RABL6_MOUSE	8	3	3	25.7312	25.9584	25.7871	25.2714	79831		Rab-like protein 6 OS=Mus musculus OX=10090 GN=Rabl6 PE=1 SV=2
O55222	ILK_MOUSE	22.12	8	8	28.9031	29.0788	28.6251	29.1483	51373	Oxidation (M)	Integrin-linked protein kinase OS=Mus musculus OX=10090 GN=Ilk PE=1 SV=2
Q9QXN0	SHRM3_MOUSE	0.81	1	1	21.5003	22.7429	NaN	21.2347	214888	Acetylation (N-term)	Protein Shroom3 OS=Mus musculus OX=10090 GN=Shroom3 PE=1 SV=2
Q9JHK4	PGTA_MOUSE	19.93	9	9	26.275	26.9977	26.2463	27.1214	64989	Oxidation (M)	Geranylgeranyl transferase type-2 subunit alpha OS=Mus musculus OX=10090 GN=Rabggta PE=1 SV=1
P60824	CIRBP_MOUSE	26.74	3	3	25.3376	25.8788	25.4862	25.6292	18607		Cold-inducible RNA-binding protein OS=Mus musculus OX=10090 GN=Cirbp PE=1 SV=1
Q99LL5	PWP1_MOUSE	19.56	5	5	25.8336	25.2785	26.8741	26.1055	55587	Oxidation (M)	Periodic tryptophan protein 1 homolog OS=Mus musculus OX=10090 GN=Pwp1 PE=1 SV=1
E9PZM4	CHD2_MOUSE	2.35	6	3	23.199	23.9316	22.9795	24.1871	210804	Oxidation (M)	Chromodomain-helicase-DNA-binding protein 2 OS=Mus musculus OX=10090 GN=Chd2 PE=1 SV=1
Q9QYC7	VKGC_MOUSE	4.36	2	2	25.0484	25.8927	25.3273	25.8764	87195		Vitamin K-dependent gamma-carboxylase OS=Mus musculus OX=10090 GN=Ggcx PE=1 SV=1
Q64HY3	SP9_MOUSE	8.88	2	2	23.0467	20.6948	21.0688	22.2822	48959	Acetylation (N-term);NBF	Transcription factor Sp9 OS=Mus musculus OX=10090 GN=Sp9 PE=1 SV=1
Q8BHD7	PTBP3_MOUSE	23.9	7	6	28.1312	27.9869	28.249	28.5389	56701	Oxidation (M)	Polypyrimidine tract-binding protein 3 OS=Mus musculus OX=10090 GN=Ptbp3 PE=1 SV=1
P07744	K2C4_MOUSE	2.86	2	1	22.8353	24.0275	23.3101	23.5638	56283	Acetylation (N-term);Oxidation (M)	Keratin, type II cytoskeletal 4 OS=Mus musculus OX=10090 GN=Krt4 PE=1 SV=2
Q6NZQ2	DDX31_MOUSE	6.11	3	3	25.5014	26.3477	25.1642	25.1527	76913		Probable ATP-dependent RNA helicase DDX31 OS=Mus musculus OX=10090 GN=Ddx31 PE=2 SV=2
Q99LR1	ABD12_MOUSE	13.57	5	5	25.7821	26.2625	25.895	26.3894	45270	Oxidation (M)	Lysophosphatidylserine lipase ABHD12 OS=Mus musculus OX=10090 GN=Abhd12 PE=1 SV=2
Q8C0R9	LRRD1_MOUSE	1.76	1	1	24.6153	24.0443	23.9134	23.7077	97132	Acetylation (N-term);Oxidation (M)	Leucine-rich repeat and death domain-containing protein 1 OS=Mus musculus OX=10090 GN=Lrrd1 PE=2 SV=2
A2AN08	UBR4_MOUSE	21.47	72	72	27.8445	28.4473	27.4707	28.2445	572290	NBF;Oxidation (M)	E3 ubiquitin-protein ligase UBR4 OS=Mus musculus OX=10090 GN=Ubr4 PE=1 SV=1
Q8VC52	RBPS2_MOUSE	23.3	3	3	21.9758	24.2821	24.4298	24.7182	22463		RNA-binding protein with multiple splicing 2 OS=Mus musculus OX=10090 GN=Rbpms2 PE=1 SV=1
P55264	ADK_MOUSE	34.9	9	9	29.9677	29.6848	30.0349	30.0479	40149	Oxidation (M)	Adenosine kinase OS=Mus musculus OX=10090 GN=Adk PE=1 SV=2
O08811	ERCC2_MOUSE	11.45	5	5	24.558	25.065	24.7338	25.0317	86842		General transcription and DNA repair factor IIH helicase subunit XPD OS=Mus musculus OX=10090 GN=Ercc2 PE=1 SV=2
P62274	RS29_MOUSE	19.64	1	1	24.9134	22.5211	25.0275	22.255	6677		40S ribosomal protein S29 OS=Mus musculus OX=10090 GN=Rps29 PE=1 SV=2
Q9D864	ARP6_MOUSE	3.79	1	1	20.0649	22.0703	23.3101	21.802	45785		Actin-related protein 6 OS=Mus musculus OX=10090 GN=Actr6 PE=1 SV=2
O54786	DFFA_MOUSE	9.06	2	2	24.3645	25.6944	25.7024	25.8504	36572		DNA fragmentation factor subunit alpha OS=Mus musculus OX=10090 GN=Dffa PE=1 SV=2
Q9QZE7	TSNAX_MOUSE	40.69	8	8	28.3452	27.4073	26.6865	27.4314	32926	Oxidation (M)	Translin-associated protein X OS=Mus musculus OX=10090 GN=Tsnax PE=1 SV=1
Q9D2C6	RPC8_MOUSE	14.22	2	2	24.7129	24.5463	24.4298	24.5404	22948		DNA-directed RNA polymerase III subunit RPC8 OS=Mus musculus OX=10090 GN=Polr3h PE=1 SV=2
O35887	CALU_MOUSE	57.78	13	13	28.0453	29.4354	29.4995	28.8474	37064	Oxidation (M)	Calumenin OS=Mus musculus OX=10090 GN=Calu PE=1 SV=1
P62702	RS4X_MOUSE	48.29	14	14	33.1483	33.1544	32.6565	32.3276	29598	NBF;Oxidation (M)	40S ribosomal protein S4, X isoform OS=Mus musculus OX=10090 GN=Rps4x PE=1 SV=2
Q8VDG5	PPCS_MOUSE	4.82	1	1	20.355	20.1122	19.136	19.6112	33794		Phosphopantothenate--cysteine ligase OS=Mus musculus OX=10090 GN=Ppcs PE=1 SV=1
Q9CQ60	6PGL_MOUSE	61.87	9	9	29.2445	29.2781	29.1866	28.9923	27254	Acetylation (N-term);Oxidation (M)	6-phosphogluconolactonase OS=Mus musculus OX=10090 GN=Pgls PE=1 SV=1
Q99PM3	TF2AA_MOUSE	7.41	2	2	25.3066	25.9473	25.3645	26.4024	41614	Oxidation (M)	Transcription initiation factor IIA subunit 1 OS=Mus musculus OX=10090 GN=Gtf2a1 PE=1 SV=2
P47738	ALDH2_MOUSE	40.85	15	15	30.0737	30.3724	29.9677	30.3088	56538	Oxidation (M)	Aldehyde dehydrogenase, mitochondrial OS=Mus musculus OX=10090 GN=Aldh2 PE=1 SV=1
Q8R3Q0	SARAF_MOUSE	3.89	1	1	22.0898	22.599	22.1439	22.465	35856		Store-operated calcium entry-associated regulatory factor OS=Mus musculus OX=10090 GN=Saraf PE=1 SV=2
Q08091	CNN1_MOUSE	34.34	8	8	28.7988	28.6998	28.604	28.5933	33356	Oxidation (M)	Calponin-1 OS=Mus musculus OX=10090 GN=Cnn1 PE=1 SV=1
A2RSJ4	UH1BL_MOUSE	8.79	9	9	24.7895	24.4551	24.6375	23.895	161940	Oxidation (M)	UHRF1-binding protein 1-like OS=Mus musculus OX=10090 GN=Uhrf1bp1l PE=1 SV=2
P17426	AP2A1_MOUSE	29.17	22	18	28.7676	29.3869	28.6527	29.3683	107664	Acetylation (N-term);NBF;Oxidation (M)	AP-2 complex subunit alpha-1 OS=Mus musculus OX=10090 GN=Ap2a1 PE=1 SV=1
P97287	MCL1_MOUSE	38.07	7	7	27.5969	28.2625	27.6527	28.019	35217	Acetylation (N-term);NBF;Oxidation (M)	Induced myeloid leukemia cell differentiation protein Mcl-1 homolog OS=Mus musculus OX=10090 GN=Mcl1 PE=1 SV=3
Q8K248	HPDL_MOUSE	9.97	2	2	18.3256	21.4331	21.8694	21.8864	39909		4-hydroxyphenylpyruvate dioxygenase-like protein OS=Mus musculus OX=10090 GN=Hpdl PE=2 SV=1
P0DP26	CALM1_MOUSE	8.72	1	1	23.4298	24.6918	24.6811	23.7182	16838	Acetylation (N-term)	Calmodulin-1 OS=Mus musculus OX=10090 GN=Calm1 PE=1 SV=1
Q80U70	SUZ12_MOUSE	17.68	8	8	27.4862	27.6798	26.8741	27.6998	83026	Acetylation (N-term);NBF;Oxidation (M)	Polycomb protein Suz12 OS=Mus musculus OX=10090 GN=Suz12 PE=1 SV=2
Q3UFM5	NOM1_MOUSE	17.33	11	11	25.3066	26.506	24.9134	26.1965	95960	Oxidation (M)	Nucleolar MIF4G domain-containing protein 1 OS=Mus musculus OX=10090 GN=Nom1 PE=1 SV=2
Q8BKX1	BAIP2_MOUSE	7.66	3	3	26.527	26.2372	26.48	26.0833	59237		Brain-specific angiogenesis inhibitor 1-associated protein 2 OS=Mus musculus OX=10090 GN=Baiap2 PE=1 SV=2
Q9D115	ZN706_MOUSE	15.79	1	1	28.4394	28.5536	28.0813	28.6831	8498		Zinc finger protein 706 OS=Mus musculus OX=10090 GN=Znf706 PE=1 SV=1
Q8K202	RPA49_MOUSE	29.88	10	10	27.9088	27.6389	28.4629	28.0084	54034	Acetylation (N-term);NBF;Oxidation (M)	DNA-directed RNA polymerase I subunit RPA49 OS=Mus musculus OX=10090 GN=Polr1e PE=1 SV=2
Q8R1F9	RPP40_MOUSE	3.03	1	1	20.0635	18.4256	19.1615	19.5289	41547		Ribonuclease P protein subunit p40 OS=Mus musculus OX=10090 GN=Rpp40 PE=2 SV=2
Q9DBG3	AP2B1_MOUSE	30.31	25	17	29.3724	28.9512	29.2376	28.6764	104583	Oxidation (M)	AP-2 complex subunit beta OS=Mus musculus OX=10090 GN=Ap2b1 PE=1 SV=1
Q9CQZ6	NDUB3_MOUSE	33.65	3	3	26.7895	26.452	26.3562	26.3562	11692	Oxidation (M)	NADH dehydrogenase [ubiquinone] 1 beta subcomplex subunit 3 OS=Mus musculus OX=10090 GN=Ndufb3 PE=1 SV=1
Q8K0V4	CNOT3_MOUSE	9.05	5	5	26.976	27.3066	26.4877	27.1604	81946	Oxidation (M)	CCR4-NOT transcription complex subunit 3 OS=Mus musculus OX=10090 GN=Cnot3 PE=1 SV=1
Q91V81	RBM42_MOUSE	16.74	3	3	26.604	26.2856	27.0711	26.1795	50236	Acetylation (N-term);Oxidation (M)	RNA-binding protein 42 OS=Mus musculus OX=10090 GN=Rbm42 PE=1 SV=2
Q99P69	NUF2_MOUSE	9.72	4	4	24.8717	25.1015	24.5983	25.0317	54594	Oxidation (M)	Kinetochore protein Nuf2 OS=Mus musculus OX=10090 GN=Nuf2 PE=1 SV=2
O70258	SGCE_MOUSE	2.29	1	1	20.9542	21.8325	19.9759	21.1138	49736		Epsilon-sarcoglycan OS=Mus musculus OX=10090 GN=Sgce PE=1 SV=2
A2AGT5	CKAP5_MOUSE	28.44	47	47	29.2692	29.7357	28.8593	29.0531	225635	Acetylation (N-term);Oxidation (M)	Cytoskeleton-associated protein 5 OS=Mus musculus OX=10090 GN=Ckap5 PE=1 SV=1
Q8BT07	CEP55_MOUSE	20.13	8	8	26.4938	27.1115	25.7568	26.6458	53930	Oxidation (M)	Centrosomal protein of 55 kDa OS=Mus musculus OX=10090 GN=Cep55 PE=1 SV=2
Q6P9R2	OXSR1_MOUSE	29.6	11	10	28.3023	28.3704	28.2891	27.9705	58214	Acetylation (N-term);Oxidation (M)	Serine/threonine-protein kinase OSR1 OS=Mus musculus OX=10090 GN=Oxsr1 PE=1 SV=1
Q7JJ13	BRD2_MOUSE	28.45	15	15	26.4984	26.6998	26.7389	26.4984	88067	Acetylation (N-term);NBF;Oxidation (M)	Bromodomain-containing protein 2 OS=Mus musculus OX=10090 GN=Brd2 PE=1 SV=1
Q80TC6	ZSWM5_MOUSE	3.11	1	1	22.0459	NaN	23.3376	22.5187	130927	Acetylation (N-term);NBF	Zinc finger SWIM domain-containing protein 5 OS=Mus musculus OX=10090 GN=Zswim5 PE=2 SV=2
P62960	YBOX1_MOUSE	45.34	13	9	31.1901	31.2479	30.8234	30.9677	35730	Acetylation (N-term);NBF;Oxidation (M)	Y-box-binding protein 1 OS=Mus musculus OX=10090 GN=Ybx1 PE=1 SV=3
Q9DC53	CPNE8_MOUSE	9.19	4	3	24.3307	24.1719	24.275	24.2821	64667		Copine-8 OS=Mus musculus OX=10090 GN=Cpne8 PE=2 SV=3
Q8BW10	NOB1_MOUSE	31.51	9	9	27.8623	27.8623	27.604	27.8445	45464	Oxidation (M)	RNA-binding protein NOB1 OS=Mus musculus OX=10090 GN=Nob1 PE=1 SV=1
P83741	WNK1_MOUSE	10.56	19	19	27.2714	26.8858	26.9539	26.9428	250934	Oxidation (M)	Serine/threonine-protein kinase WNK1 OS=Mus musculus OX=10090 GN=Wnk1 PE=1 SV=2
Q923U0	TM1L1_MOUSE	3.59	1	1	20.939	19.3268	21.7593	19.3205	52695		TOM1-like protein 1 OS=Mus musculus OX=10090 GN=Tom1l1 PE=1 SV=1
Q99NB8	UBQL4_MOUSE	33.89	11	10	28.1652	28.5573	27.8203	28.5573	63506	Acetylation (N-term);Oxidation (M)	Ubiquilin-4 OS=Mus musculus OX=10090 GN=Ubqln4 PE=1 SV=1
Q9D8S3	ARFG3_MOUSE	15.49	7	6	26.0813	26.1681	25.8811	26.1852	57456		ADP-ribosylation factor GTPase-activating protein 3 OS=Mus musculus OX=10090 GN=Arfgap3 PE=1 SV=2
Q9D187	CIA2B_MOUSE	50.92	5	5	24.6811	23.976	24.4105	24.9043	17667	Oxidation (M)	Cytosolic iron-sulfur assembly component 2B OS=Mus musculus OX=10090 GN=Ciao2b PE=1 SV=1
Q6PFD9	NUP98_MOUSE	22.47	26	26	28.189	28.5573	28.3494	29.2239	197241	Acetylation (N-term);Oxidation (M)	Nuclear pore complex protein Nup98-Nup96 OS=Mus musculus OX=10090 GN=Nup98 PE=1 SV=2
O08919	NUMBL_MOUSE	4.8	2	2	23.4298	24.4234	23.6209	24.2535	64130		Numb-like protein OS=Mus musculus OX=10090 GN=Numbl PE=1 SV=3
P60670	NPL4_MOUSE	31.74	15	15	27.6595	27.5536	27.6865	27.4629	68017	Oxidation (M)	Nuclear protein localization protein 4 homolog OS=Mus musculus OX=10090 GN=Nploc4 PE=1 SV=3
Q91YR5	EFNMT_MOUSE	19.05	8	8	26.3629	27.0813	25.7796	26.7771	78757	Oxidation (M)	eEF1A lysine and N-terminal methyltransferase OS=Mus musculus OX=10090 GN=EEF1AKNMT PE=1 SV=1
Q9JIY5	HTRA2_MOUSE	35.81	12	11	27.8564	28.9977	27.391	28.4512	49348	Oxidation (M)	Serine protease HTRA2, mitochondrial OS=Mus musculus OX=10090 GN=Htra2 PE=1 SV=2
P10630	IF4A2_MOUSE	31.2	18	9	26.8385	26.9539	26.527	27.019	46402	Oxidation (M)	Eukaryotic initiation factor 4A-II OS=Mus musculus OX=10090 GN=Eif4a2 PE=1 SV=2
Q6PGH0	UBTD2_MOUSE	14.96	2	2	24.1642	23.7077	23.7077	23.8385	26144		Ubiquitin domain-containing protein 2 OS=Mus musculus OX=10090 GN=Ubtd2 PE=2 SV=1
Q9ERD7	TBB3_MOUSE	14.67	16	4	30.9539	31.0927	31.4727	31.1422	50419	Oxidation (M)	Tubulin beta-3 chain OS=Mus musculus OX=10090 GN=Tubb3 PE=1 SV=1
Q9JME5	AP3B2_MOUSE	1.39	2	1	19.9708	20.7315	19.272	20.2604	119193		AP-3 complex subunit beta-2 OS=Mus musculus OX=10090 GN=Ap3b2 PE=1 SV=2
Q80YS6	AFAP1_MOUSE	7.93	4	4	23.9584	24.0609	23.5754	25.0062	80615	Acetylation (N-term);Oxidation (M)	Actin filament-associated protein 1 OS=Mus musculus OX=10090 GN=Afap1 PE=1 SV=1
Q8C9S4	CC186_MOUSE	5.23	3	3	23.2961	23.126	22.8032	21.1191	104901		Coiled-coil domain-containing protein 186 OS=Mus musculus OX=10090 GN=Ccdc186 PE=1 SV=2
P53995	APC1_MOUSE	22.33	29	29	27.7325	28.1164	27.2714	28.9841	215994	Oxidation (M)	Anaphase-promoting complex subunit 1 OS=Mus musculus OX=10090 GN=Anapc1 PE=1 SV=2
Q8BU04	UBR7_MOUSE	7.76	3	3	25.8504	27.4629	24.239	25.5463	48065		Putative E3 ubiquitin-protein ligase UBR7 OS=Mus musculus OX=10090 GN=Ubr7 PE=1 SV=1
Q8CJF7	ELYS_MOUSE	27.37	43	43	26.4504	27.9316	26.6181	27.2891	247646	Acetylation (N-term);NBF;Oxidation (M)	Protein ELYS OS=Mus musculus OX=10090 GN=Ahctf1 PE=1 SV=1
Q99LL3	CHSTC_MOUSE	7.88	2	2	22.2044	21.7537	22.2681	21.8708	49398		Carbohydrate sulfotransferase 12 OS=Mus musculus OX=10090 GN=Chst12 PE=2 SV=2
Q8CI04	COG3_MOUSE	6.34	4	4	25.0567	25.989	24.8576	25.341	93283		Conserved oligomeric Golgi complex subunit 3 OS=Mus musculus OX=10090 GN=Cog3 PE=1 SV=3
Q3UVG3	F91A1_MOUSE	21.39	11	11	26.6998	26.8858	26.8504	26.8623	93464	Acetylation (N-term);Oxidation (M)	Protein FAM91A1 OS=Mus musculus OX=10090 GN=Fam91a1 PE=1 SV=1
Q8K021	SCAM1_MOUSE	26.63	6	6	30.4919	30.393	26.275	29.7357	38029	Acetylation (N-term);Oxidation (M)	Secretory carrier-associated membrane protein 1 OS=Mus musculus OX=10090 GN=Scamp1 PE=1 SV=1
A2ADY9	DDI2_MOUSE	22.56	5	5	27.726	27.9923	27.3578	28.0762	44591	Oxidation (M)	Protein DDI1 homolog 2 OS=Mus musculus OX=10090 GN=Ddi2 PE=1 SV=1
Q99M87	DNJA3_MOUSE	18.54	6	6	27.0609	27.9977	27.1015	27.7581	52443		DnaJ homolog subfamily A member 3, mitochondrial OS=Mus musculus OX=10090 GN=Dnaja3 PE=1 SV=1
Q61586	GPAT1_MOUSE	5.08	2	2	23.2171	22.4984	23.3239	23.4298	93705	Acetylation (N-term);Oxidation (M)	Glycerol-3-phosphate acyltransferase 1, mitochondrial OS=Mus musculus OX=10090 GN=Gpam PE=1 SV=2
Q8BHE1	GEMI8_MOUSE	5.46	1	1	18.6509	19.3171	20.616	19.9546	28396		Gem-associated protein 8 OS=Mus musculus OX=10090 GN=Gemin8 PE=1 SV=1
O08529	CAN2_MOUSE	36.14	21	21	30.1361	30.3088	29.8504	30.0609	79872	Oxidation (M)	Calpain-2 catalytic subunit OS=Mus musculus OX=10090 GN=Capn2 PE=1 SV=4
Q91ZJ5	UGPA_MOUSE	44.09	14	14	28.0505	27.673	27.7389	27.9031	56979	Oxidation (M)	UTP--glucose-1-phosphate uridylyltransferase OS=Mus musculus OX=10090 GN=Ugp2 PE=1 SV=3
Q2VPQ9	EAF6_MOUSE	11.52	1	1	25.0567	24.9225	24.9672	24.6375	21649		Chromatin modification-related protein MEAF6 OS=Mus musculus OX=10090 GN=Meaf6 PE=1 SV=1
Q91VM9	IPYR2_MOUSE	25.15	6	6	26.4378	25.7945	26.0833	25.7415	38115	Oxidation (M)	Inorganic pyrophosphatase 2, mitochondrial OS=Mus musculus OX=10090 GN=Ppa2 PE=1 SV=1
Q9CQ33	LZTR1_MOUSE	2.03	1	1	25.2714	21.9606	20.905	21.7707	94476	Acetylation (N-term)	Leucine-zipper-like transcriptional regulator 1 OS=Mus musculus OX=10090 GN=Lztr1 PE=1 SV=2
Q9CPT3	NANP_MOUSE	12.1	2	2	24.1946	25.0484	26.2353	25.7338	27808		N-acylneuraminate-9-phosphatase OS=Mus musculus OX=10090 GN=Nanp PE=1 SV=1
Q8CG46	SMC5_MOUSE	10.45	9	9	25.6237	27.5682	25.3101	26.17	128813	Oxidation (M)	Structural maintenance of chromosomes protein 5 OS=Mus musculus OX=10090 GN=Smc5 PE=1 SV=1
Q812F8	MGT4B_MOUSE	3.28	1	1	20.6279	NaN	21.268	20.2623	63302		Alpha-1,3-mannosyl-glycoprotein 4-beta-N-acetylglucosaminyltransferase B OS=Mus musculus OX=10090 GN=Mgat4b PE=2 SV=1
Q00PI9	HNRL2_MOUSE	16.64	11	11	29.5128	29.8653	29.4512	29.6663	84940	Oxidation (M)	Heterogeneous nuclear ribonucleoprotein U-like protein 2 OS=Mus musculus OX=10090 GN=Hnrnpul2 PE=1 SV=2
Q8BHC7	RHBL4_MOUSE	5.4	1	1	23.3511	23.9134	23.4041	23.7492	35776		Rhomboid-related protein 4 OS=Mus musculus OX=10090 GN=Rhbdd1 PE=1 SV=1
Q8BQ47	CNPY4_MOUSE	22.86	4	4	27.3494	28.249	27.2625	26.1391	28094	Oxidation (M)	Protein canopy homolog 4 OS=Mus musculus OX=10090 GN=Cnpy4 PE=1 SV=1
Q8BV13	CSN7B_MOUSE	20.08	4	4	25.6068	25.3066	25.2679	24.8433	29689	Oxidation (M)	COP9 signalosome complex subunit 7b OS=Mus musculus OX=10090 GN=Cops7b PE=1 SV=1
Q9ES56	TPPC4_MOUSE	24.2	4	4	25.2463	25.6918	25.1681	25.7182	24385	Oxidation (M)	Trafficking protein particle complex subunit 4 OS=Mus musculus OX=10090 GN=Trappc4 PE=1 SV=1
Q9CPQ3	TOM22_MOUSE	69.01	6	6	30.4727	31.0479	30.2979	31.0927	15537	Acetylation (N-term);Oxidation (M)	Mitochondrial import receptor subunit TOM22 homolog OS=Mus musculus OX=10090 GN=Tomm22 PE=1 SV=3
Q3V1T4	P3H1_MOUSE	13.94	6	6	27.6181	27.4629	27.1604	27.5315	83651	Oxidation (M)	Prolyl 3-hydroxylase 1 OS=Mus musculus OX=10090 GN=P3h1 PE=1 SV=2
O70400	PDLI1_MOUSE	55.96	14	14	30.9539	31.6458	30.8901	31.3463	35774	Acetylation (N-term);NBF;Oxidation (M)	PDZ and LIM domain protein 1 OS=Mus musculus OX=10090 GN=Pdlim1 PE=1 SV=4
P28659	CELF1_MOUSE	22.43	7	7	27.8858	27.141	26.8019	27.524	52107	Acetylation (N-term);Oxidation (M)	CUGBP Elav-like family member 1 OS=Mus musculus OX=10090 GN=Celf1 PE=1 SV=2
Q8K304	TM129_MOUSE	3.87	1	1	21.5329	23.6757	22.188	23.2256	40628		E3 ubiquitin-protein ligase TM129 OS=Mus musculus OX=10090 GN=Tmem129 PE=2 SV=1
P41230	KDM5C_MOUSE	11.71	11	11	25.1871	26.3342	24.7234	26.1719	175313	Oxidation (M)	Lysine-specific demethylase 5C OS=Mus musculus OX=10090 GN=Kdm5c PE=1 SV=4
Q61462	CY24A_MOUSE	14.58	1	1	24.275	24.8811	24.1174	24.2607	20748	Oxidation (M)	Cytochrome b-245 light chain OS=Mus musculus OX=10090 GN=Cyba PE=1 SV=3
Q8K409	DPOLB_MOUSE	17.01	4	4	26.317	26.3135	25.9088	26.8974	38288	Oxidation (M)	DNA polymerase beta OS=Mus musculus OX=10090 GN=Polb PE=1 SV=3
Q9Z315	SNUT1_MOUSE	37.22	23	23	27.8799	28.2123	27.6595	27.9031	90885	Acetylation (N-term);Oxidation (M)	U4/U6.U5 tri-snRNP-associated protein 1 OS=Mus musculus OX=10090 GN=Sart1 PE=1 SV=1
Q99J36	THUM1_MOUSE	23.14	6	6	27.5754	28.4707	27.3494	27.726	38885	Acetylation (N-term);Oxidation (M)	THUMP domain-containing protein 1 OS=Mus musculus OX=10090 GN=Thumpd1 PE=1 SV=1
Q91XB0	TREX1_MOUSE	7.64	2	2	22.1798	22.2377	22.5903	22.7545	33675	NBF	Three-prime repair exonuclease 1 OS=Mus musculus OX=10090 GN=Trex1 PE=1 SV=2
P70295	AUP1_MOUSE	24.39	6	6	25.5345	26.5165	25.4583	26.3427	46121	Acetylation (N-term);Oxidation (M)	Lipid droplet-regulating VLDL assembly factor AUP1 OS=Mus musculus OX=10090 GN=Aup1 PE=1 SV=1
Q9JM13	RABX5_MOUSE	9.57	4	4	25.2856	25.6375	24.8433	25.2607	56869	Oxidation (M)	Rab5 GDP/GTP exchange factor OS=Mus musculus OX=10090 GN=Rabgef1 PE=1 SV=1
Q63829	COMD3_MOUSE	38.46	6	6	28.0084	27.9814	27.8264	28.6389	22037	Acetylation (N-term);Oxidation (M)	COMM domain-containing protein 3 OS=Mus musculus OX=10090 GN=Commd3 PE=1 SV=1
A2AWP8	ARGAL_MOUSE	1.02	1	1	21.0325	20.9414	22.0009	22.7892	139987		Rho guanine nucleotide exchange factor 10-like protein OS=Mus musculus OX=10090 GN=Arhgef10l PE=1 SV=1
P15864	H12_MOUSE	16.98	14	3	32.2393	33.1192	31.5062	32.3223	21267	Acetylation (N-term);NBF	Histone H1.2 OS=Mus musculus OX=10090 GN=H1-2 PE=1 SV=2
Q8BH57	WDR48_MOUSE	24.11	9	9	25.7846	26.7645	25.8312	26.7129	76007	Oxidation (M)	WD repeat-containing protein 48 OS=Mus musculus OX=10090 GN=Wdr48 PE=1 SV=1
P56812	PDCD5_MOUSE	19.84	2	2	25.5955	26.228	25.2926	26.0547	14275		Programmed cell death protein 5 OS=Mus musculus OX=10090 GN=Pdcd5 PE=1 SV=3
P35979	RL12_MOUSE	56.97	8	8	32.1694	31.3982	31.6022	31.4032	17805	NBF	60S ribosomal protein L12 OS=Mus musculus OX=10090 GN=Rpl12 PE=1 SV=2
Q8C9B9	DIDO1_MOUSE	17.95	23	23	25.6784	25.726	25.4425	25.4831	247176	Oxidation (M)	Death-inducer obliterator 1 OS=Mus musculus OX=10090 GN=Dido1 PE=1 SV=4
Q9D0D5	T2EA_MOUSE	17.73	5	5	27.1604	26.8858	26.5898	27.0084	49593	Acetylation (N-term)	General transcription factor IIE subunit 1 OS=Mus musculus OX=10090 GN=Gtf2e1 PE=1 SV=1
Q8CJ27	ASPM_MOUSE	0.35	1	1	19.2788	17.9457	20.8307	19.9504	364218		Abnormal spindle-like microcephaly-associated protein homolog OS=Mus musculus OX=10090 GN=Aspm PE=1 SV=2
Q8C5W3	TBCEL_MOUSE	16.04	3	3	25.0526	25.239	24.5225	25.2243	48032	Oxidation (M)	Tubulin-specific chaperone cofactor E-like protein OS=Mus musculus OX=10090 GN=Tbcel PE=1 SV=1
Q6P3A8	ODBB_MOUSE	4.62	1	1	22.1571	23.2821	22.7187	23.0358	42880		2-oxoisovalerate dehydrogenase subunit beta, mitochondrial OS=Mus musculus OX=10090 GN=Bckdhb PE=1 SV=2
P97372	PSME2_MOUSE	39.75	7	7	28.2979	28.1263	27.7645	28.0453	27057	Oxidation (M)	Proteasome activator complex subunit 2 OS=Mus musculus OX=10090 GN=Psme2 PE=1 SV=4
O88455	DHCR7_MOUSE	7.01	2	2	23.2821	24.019	23.9225	23.7389	53919		7-dehydrocholesterol reductase OS=Mus musculus OX=10090 GN=Dhcr7 PE=1 SV=1
Q9D820	PRXD1_MOUSE	13.02	2	2	24.2243	23.8288	23.1875	23.6865	18862	Oxidation (M)	Prolyl-tRNA synthetase associated domain-containing protein 1 OS=Mus musculus OX=10090 GN=Prorsd1 PE=1 SV=1
Q8BHW2	OSCP1_MOUSE	5.28	1	1	22.307	22.9433	23.0241	22.973	43232		Protein OSCP1 OS=Mus musculus OX=10090 GN=Oscp1 PE=1 SV=1
Q91VW3	SH3L3_MOUSE	16.13	1	1	28.2847	28.4551	28.0349	28.1115	10477		SH3 domain-binding glutamic acid-rich-like protein 3 OS=Mus musculus OX=10090 GN=Sh3bgrl3 PE=1 SV=1
A2APB8	TPX2_MOUSE	23.22	14	14	26.9539	27.2262	26.5359	26.7645	85894	Oxidation (M)	Targeting protein for Xklp2 OS=Mus musculus OX=10090 GN=Tpx2 PE=1 SV=1
Q8CDM1	ATAD2_MOUSE	16.73	10	10	25.0526	25.8069	25.4614	25.3712	117943	Acetylation (N-term);Oxidation (M)	ATPase family AAA domain-containing protein 2 OS=Mus musculus OX=10090 GN=Atad2 PE=1 SV=1
Q61191	HCFC1_MOUSE	21.37	26	26	28.1459	28.524	28.0137	28.4551	210437	Acetylation (N-term);Oxidation (M)	Host cell factor 1 OS=Mus musculus OX=10090 GN=Hcfc1 PE=1 SV=2
Q8BMC4	NOP9_MOUSE	23.74	9	9	26.6998	27.4394	27.1115	27.8264	70046		Nucleolar protein 9 OS=Mus musculus OX=10090 GN=Nop9 PE=1 SV=1
Q9CQC8	SPG21_MOUSE	16.23	3	3	26.1908	26.6595	26.2891	26.7389	34952	Oxidation (M)	Maspardin OS=Mus musculus OX=10090 GN=Spg21 PE=1 SV=1
Q8BTZ4	APC5_MOUSE	16.35	7	7	26.4186	26.6458	26.0854	26.3645	83098	Oxidation (M)	Anaphase-promoting complex subunit 5 OS=Mus musculus OX=10090 GN=Anapc5 PE=1 SV=1
Q9D1M7	FKB11_MOUSE	4.98	1	1	27.3828	27.0296	27.0813	27.0711	22137		Peptidyl-prolyl cis-trans isomerase FKBP11 OS=Mus musculus OX=10090 GN=Fkbp11 PE=1 SV=1
O35149	ZNT4_MOUSE	10.7	2	2	23.4298	23.3376	24.0691	23.2961	47800		Zinc transporter 4 OS=Mus musculus OX=10090 GN=Slc30a4 PE=1 SV=2
Q9WVQ5	MTNB_MOUSE	25.73	4	4	26.4122	27.1115	26.2589	26.6181	26949	Oxidation (M)	Methylthioribulose-1-phosphate dehydratase OS=Mus musculus OX=10090 GN=Apip PE=1 SV=1
Q6P4T0	ATG2A_MOUSE	7.52	8	8	24.4614	25.065	24.0772	24.9225	210939	Oxidation (M)	Autophagy-related protein 2 homolog A OS=Mus musculus OX=10090 GN=Atg2a PE=1 SV=2
Q99KQ4	NAMPT_MOUSE	41.55	14	14	28.17	28.3951	27.8504	28.2803	55447	Acetylation (N-term);Oxidation (M)	Nicotinamide phosphoribosyltransferase OS=Mus musculus OX=10090 GN=Nampt PE=1 SV=1
Q60790	RASA3_MOUSE	13.31	8	8	25.9606	26.6998	26.6181	26.4234	95987	Oxidation (M)	Ras GTPase-activating protein 3 OS=Mus musculus OX=10090 GN=Rasa3 PE=1 SV=2
Q6ZWR6	SYNE1_MOUSE	0.84	5	5	23.1691	23.7594	22.8776	24.0443	1009926		Nesprin-1 OS=Mus musculus OX=10090 GN=Syne1 PE=1 SV=2
Q921R4	DJC14_MOUSE	6.54	2	2	22.7223	24.3307	25.8069	23.2961	78919	Oxidation (M)	DnaJ homolog subfamily C member 14 OS=Mus musculus OX=10090 GN=Dnajc14 PE=2 SV=2
Q9QYL7	ABT1_MOUSE	18.22	4	4	27.5014	26.8974	25.7182	27.4938	30659	Oxidation (M)	Activator of basal transcription 1 OS=Mus musculus OX=10090 GN=Abt1 PE=2 SV=1
Q8K1N4	SPAS2_MOUSE	22.2	8	8	26.8858	26.6458	25.9694	26.9203	58956	Oxidation (M)	Spermatogenesis-associated serine-rich protein 2 OS=Mus musculus OX=10090 GN=Spats2 PE=1 SV=1
Q8K2T1	NMRL1_MOUSE	20.06	5	5	26.8385	28.1065	26.7389	27.8445	34376	Oxidation (M)	NmrA-like family domain-containing protein 1 OS=Mus musculus OX=10090 GN=Nmral1 PE=1 SV=1
Q76LS9	MINY1_MOUSE	4.27	1	1	20.4364	21.7956	19.8125	20.5133	51226		Ubiquitin carboxyl-terminal hydrolase MINDY-1 OS=Mus musculus OX=10090 GN=Mindy1 PE=1 SV=1
Q9JHI5	IVD_MOUSE	13.68	4	4	25.8288	25.3975	25.767	25.433	46325	Oxidation (M)	Isovaleryl-CoA dehydrogenase, mitochondrial OS=Mus musculus OX=10090 GN=Ivd PE=1 SV=1
Q9CZT5	VASN_MOUSE	9.36	4	4	25.5225	25.9562	25.5638	25.9562	72261	Oxidation (M)	Vasorin OS=Mus musculus OX=10090 GN=Vasn PE=2 SV=2
Q9CQY5	MAGT1_MOUSE	6.27	3	3	26.574	27.604	26.2317	27.189	37970	Oxidation (M)	Magnesium transporter protein 1 OS=Mus musculus OX=10090 GN=Magt1 PE=1 SV=1
Q8CAK1	CAF17_MOUSE	6.98	2	2	21.1432	22.0135	20.5361	22.4619	38399		Putative transferase CAF17 homolog, mitochondrial OS=Mus musculus OX=10090 GN=Iba57 PE=1 SV=1
Q8R0Y6	AL1L1_MOUSE	1.22	2	1	24.8528	23.1733	22.9035	24.8093	98709		Cytosolic 10-formyltetrahydrofolate dehydrogenase OS=Mus musculus OX=10090 GN=Aldh1l1 PE=1 SV=1
P19221	THRB_MOUSE	1.46	1	1	24.4614	23.5983	21.5941	23.5522	70269		Prothrombin OS=Mus musculus OX=10090 GN=F2 PE=1 SV=1
Q9DB27	MCTS1_MOUSE	25.41	3	3	26.604	27.0296	26.6595	26.9316	20555	Oxidation (M)	Malignant T-cell-amplified sequence 1 OS=Mus musculus OX=10090 GN=Mcts1 PE=1 SV=1
Q8BSL7	ARF2_MOUSE	5.52	7	1	21.933	22.1307	22.0177	22.8468	20746		ADP-ribosylation factor 2 OS=Mus musculus OX=10090 GN=Arf2 PE=1 SV=2
Q5DW34	EHMT1_MOUSE	11.5	10	10	25.3679	25.8647	24.976	25.6012	141999	Acetylation (N-term);Oxidation (M)	Histone-lysine N-methyltransferase EHMT1 OS=Mus musculus OX=10090 GN=Ehmt1 PE=1 SV=2
Q497H0	ZFAN3_MOUSE	5.73	1	1	23.2821	24.0772	22.6891	23.3645	25081		AN1-type zinc finger protein 3 OS=Mus musculus OX=10090 GN=Zfand3 PE=2 SV=1
P33174	KIF4_MOUSE	16.82	15	15	27.0084	27.9146	27.5682	26.976	139519	Oxidation (M)	Chromosome-associated kinesin KIF4 OS=Mus musculus OX=10090 GN=Kif4 PE=1 SV=3
Q9CWL8	CTBL1_MOUSE	14.03	7	7	27.1015	27.5315	27.2353	27.3066	64980	Acetylation (N-term);Oxidation (M)	Beta-catenin-like protein 1 OS=Mus musculus OX=10090 GN=Ctnnbl1 PE=1 SV=1
Q9DCJ1	LST8_MOUSE	7.67	1	1	24.1332	23.8385	24.1174	24.4676	35851	Acetylation (N-term);Oxidation (M)	Target of rapamycin complex subunit LST8 OS=Mus musculus OX=10090 GN=Mlst8 PE=1 SV=1
P40336	VP26A_MOUSE	49.24	11	11	29.5808	29.5315	29.099	29.4254	38114	Oxidation (M)	Vacuolar protein sorting-associated protein 26A OS=Mus musculus OX=10090 GN=Vps26a PE=1 SV=1
Q9JMD3	STA10_MOUSE	4.12	1	1	22.1196	23.093	20.9025	22.5686	32951		START domain-containing protein 10 OS=Mus musculus OX=10090 GN=Stard10 PE=1 SV=1
Q9Z1Y4	TRIP6_MOUSE	27.71	7	7	27.2353	28.0453	27.0296	27.7958	50934	Oxidation (M)	Thyroid receptor-interacting protein 6 OS=Mus musculus OX=10090 GN=Trip6 PE=1 SV=1
Q8R2T8	TF3C5_MOUSE	9.23	3	3	26.0914	25.9781	25.673	25.8142	60502	Oxidation (M)	General transcription factor 3C polypeptide 5 OS=Mus musculus OX=10090 GN=Gtf3c5 PE=2 SV=2
O35218	CPSF2_MOUSE	29.16	13	13	26.8741	27.17	26.7129	27.2535	88383	Oxidation (M)	Cleavage and polyadenylation specificity factor subunit 2 OS=Mus musculus OX=10090 GN=Cpsf2 PE=1 SV=1
Q6NSU3	GL8D1_MOUSE	14.56	3	3	24.275	24.6649	24.1795	24.417	41990		Glycosyltransferase 8 domain-containing protein 1 OS=Mus musculus OX=10090 GN=Glt8d1 PE=1 SV=1
Q8CEE6	PASK_MOUSE	1.88	1	1	NaN	23.1072	22.9528	23.2821	151250	Oxidation (M)	PAS domain-containing serine/threonine-protein kinase OS=Mus musculus OX=10090 GN=Pask PE=1 SV=3
Q3U0B3	DHR11_MOUSE	6.54	1	1	NaN	19.4762	19.1669	18.8421	28274		Dehydrogenase/reductase SDR family member 11 OS=Mus musculus OX=10090 GN=Dhrs11 PE=1 SV=1
Q9CR27	WASC3_MOUSE	21.65	2	2	24.8811	24.976	24.217	25.0526	21092	Acetylation (N-term);Oxidation (M)	WASH complex subunit 3 OS=Mus musculus OX=10090 GN=Washc3 PE=1 SV=1
Q8K013	GTPBA_MOUSE	10.11	2	2	21.972	19.2336	22.2897	20.8189	40142		GTP-binding protein 10 OS=Mus musculus OX=10090 GN=Gtpbp10 PE=2 SV=1
P02535	K1C10_MOUSE	11.05	7	5	28.9456	30.0864	27.6798	29.8218	57770	Acetylation (N-term);NBF	Keratin, type I cytoskeletal 10 OS=Mus musculus OX=10090 GN=Krt10 PE=1 SV=3
Q9R233	TPSN_MOUSE	10.75	3	3	24.7895	25.3307	24.3844	25.2926	49736		Tapasin OS=Mus musculus OX=10090 GN=Tapbp PE=1 SV=2
P62141	PP1B_MOUSE	17.74	10	4	29.3239	29.6713	28.7096	29.6697	37187	Acetylation (N-term);Oxidation (M)	Serine/threonine-protein phosphatase PP1-beta catalytic subunit OS=Mus musculus OX=10090 GN=Ppp1cb PE=1 SV=3
Q8BXZ1	TMX3_MOUSE	36.62	11	11	28.5014	28.9174	28.141	28.4976	51848	Oxidation (M)	Protein disulfide-isomerase TMX3 OS=Mus musculus OX=10090 GN=Tmx3 PE=1 SV=2
P99026	PSB4_MOUSE	52.65	9	9	30.8608	30.2193	30.6798	30.196	29116	NBF;Oxidation (M)	Proteasome subunit beta type-4 OS=Mus musculus OX=10090 GN=Psmb4 PE=1 SV=1
Q80U93	NU214_MOUSE	22.73	28	28	27.6389	27.9031	27.2077	27.6865	212979	Acetylation (N-term);Oxidation (M)	Nuclear pore complex protein Nup214 OS=Mus musculus OX=10090 GN=Nup214 PE=1 SV=2
Q8C1F4	CGAT2_MOUSE	3.14	1	1	19.813	18.9704	21.3661	21.4467	62530		Chondroitin sulfate N-acetylgalactosaminyltransferase 2 OS=Mus musculus OX=10090 GN=Csgalnact2 PE=2 SV=1
Q80TR8	DCAF1_MOUSE	10.69	12	12	25.3342	25.705	25.4953	25.6703	168931	Acetylation (N-term);Oxidation (M)	DDB1- and CUL4-associated factor 1 OS=Mus musculus OX=10090 GN=Dcaf1 PE=1 SV=4
P25444	RS2_MOUSE	55.97	21	21	32.1901	31.7494	32.6735	31.5933	31231	Acetylation (N-term);NBF;Oxidation (M)	40S ribosomal protein S2 OS=Mus musculus OX=10090 GN=Rps2 PE=1 SV=3
Q7TMK9	HNRPQ_MOUSE	35.63	18	18	31.525	31.5754	31.2591	31.362	69633	NBF;Oxidation (M)	Heterogeneous nuclear ribonucleoprotein Q OS=Mus musculus OX=10090 GN=Syncrip PE=1 SV=2
P62900	RL31_MOUSE	45.6	6	6	32.0017	32.6944	31.7613	32.5458	14463	NBF	60S ribosomal protein L31 OS=Mus musculus OX=10090 GN=Rpl31 PE=1 SV=1
O09172	GSH0_MOUSE	14.23	3	3	27.7325	27.3828	27.5315	27.2262	30535		Glutamate--cysteine ligase regulatory subunit OS=Mus musculus OX=10090 GN=Gclm PE=1 SV=1
Q9CXG3	PPIL4_MOUSE	17.48	7	7	25.8717	26.1293	25.8694	25.8167	57230	Oxidation (M)	Peptidyl-prolyl cis-trans isomerase-like 4 OS=Mus musculus OX=10090 GN=Ppil4 PE=1 SV=2
Q8VHZ7	IMP4_MOUSE	39.52	8	8	27.4707	27.8858	27.2077	27.6931	33656	Acetylation (N-term)	U3 small nucleolar ribonucleoprotein protein IMP4 OS=Mus musculus OX=10090 GN=Imp4 PE=2 SV=1
P05202	AATM_MOUSE	25.81	10	10	31.015	31.9574	31.2019	32.333	47411	NBF;Oxidation (M)	Aspartate aminotransferase, mitochondrial OS=Mus musculus OX=10090 GN=Got2 PE=1 SV=1
Q8C863	ITCH_MOUSE	13.89	9	8	24.6971	25.6375	25.2353	25.3877	98994	Oxidation (M)	E3 ubiquitin-protein ligase Itchy OS=Mus musculus OX=10090 GN=Itch PE=1 SV=2
O88413	TULP3_MOUSE	20.65	4	4	24.8044	24.0854	25.2353	24.7286	51231	Oxidation (M)	Tubby-related protein 3 OS=Mus musculus OX=10090 GN=Tulp3 PE=1 SV=1
Q5SPL2	PHF12_MOUSE	1.4	1	1	21.4898	21.5528	20.7285	21.1238	109509		PHD finger protein 12 OS=Mus musculus OX=10090 GN=Phf12 PE=1 SV=1
Q9D1B9	RM28_MOUSE	16.34	2	2	21.5182	23.6096	24.2096	24.0526	30170		39S ribosomal protein L28, mitochondrial OS=Mus musculus OX=10090 GN=Mrpl28 PE=1 SV=3
Q02614	S30BP_MOUSE	15.26	3	3	26.0422	26.4394	25.8361	26.1814	33832	Oxidation (M)	SAP30-binding protein OS=Mus musculus OX=10090 GN=Sap30bp PE=1 SV=2
Q61410	KGP2_MOUSE	4.07	2	2	20.6504	19.9553	21.4839	24.2891	87085		cGMP-dependent protein kinase 2 OS=Mus musculus OX=10090 GN=Prkg2 PE=1 SV=1
Q9R207	NBN_MOUSE	15.71	9	9	25.6595	25.8858	25.5667	25.8528	83795	Oxidation (M)	Nibrin OS=Mus musculus OX=10090 GN=Nbn PE=1 SV=1
Q9ET30	TM9S3_MOUSE	9.2	4	4	27.4707	27.7195	27.6527	27.6458	67545		Transmembrane 9 superfamily member 3 OS=Mus musculus OX=10090 GN=Tm9sf3 PE=1 SV=1
Q80WG5	LRC8A_MOUSE	11.48	8	7	27.141	27.4473	27.0401	27.726	94120	Oxidation (M)	Volume-regulated anion channel subunit LRRC8A OS=Mus musculus OX=10090 GN=Lrrc8a PE=1 SV=1
P38647	GRP75_MOUSE	56.7	33	33	32.6372	32.6902	31.995	32.6198	73461	Acetylation (N-term);NBF;Oxidation (M)	Stress-70 protein, mitochondrial OS=Mus musculus OX=10090 GN=Hspa9 PE=1 SV=3
Q62018	CTR9_MOUSE	7.93	7	7	26.1795	26.0854	25.4583	25.797	133408	Oxidation (M)	RNA polymerase-associated protein CTR9 homolog OS=Mus musculus OX=10090 GN=Ctr9 PE=1 SV=2
P46414	CDN1B_MOUSE	6.6	1	1	23.9134	21.4699	20.4847	20.5057	22193		Cyclin-dependent kinase inhibitor 1B OS=Mus musculus OX=10090 GN=Cdkn1b PE=1 SV=2
Q91X84	CRTC3_MOUSE	12.28	4	4	23.5165	23.5522	23.4041	23.2961	67027	Oxidation (M)	CREB-regulated transcription coactivator 3 OS=Mus musculus OX=10090 GN=Crtc3 PE=1 SV=2
P49452	CENPC_MOUSE	1.1	1	1	22.2403	22.5288	21.5065	22.5367	102154		Centromere protein C OS=Mus musculus OX=10090 GN=Cenpc PE=1 SV=2
Q9JMK2	KC1E_MOUSE	9.86	6	3	27.189	25.1642	24.239	25.019	47322		Casein kinase I isoform epsilon OS=Mus musculus OX=10090 GN=Csnk1e PE=1 SV=2
Q9EPN1	NBEA_MOUSE	2.52	4	4	21.587	21.2244	21.0025	20.4284	326743		Neurobeachin OS=Mus musculus OX=10090 GN=Nbea PE=1 SV=1
P62737	ACTA_MOUSE	2.92	31	1	28.7864	27.2077	30.1115	27.5389	42009	Acetylation (N-term)	Actin, aortic smooth muscle OS=Mus musculus OX=10090 GN=Acta2 PE=1 SV=1
Q8BUI3	LRWD1_MOUSE	9.72	4	4	24.848	25.2821	24.7129	25.5463	71594		Leucine-rich repeat and WD repeat-containing protein 1 OS=Mus musculus OX=10090 GN=LRWD1 PE=2 SV=1
Q61165	SL9A1_MOUSE	13.29	6	6	25.6068	25.239	24.9271	24.5105	91468	Oxidation (M)	Sodium/hydrogen exchanger 1 OS=Mus musculus OX=10090 GN=Slc9a1 PE=1 SV=1
Q811J3	IREB2_MOUSE	2.8	1	1	17.7119	NaN	21.2844	20.7911	104920		Iron-responsive element-binding protein 2 OS=Mus musculus OX=10090 GN=Ireb2 PE=1 SV=2
O88448	KLC2_MOUSE	21.7	10	7	26.2335	26.3975	25.6458	25.5463	66662		Kinesin light chain 2 OS=Mus musculus OX=10090 GN=Klc2 PE=1 SV=1
Q6PD26	PIGS_MOUSE	49.55	17	17	26.3118	26.7517	26.604	27.4862	61711	Acetylation (N-term);Oxidation (M)	GPI transamidase component PIG-S OS=Mus musculus OX=10090 GN=Pigs PE=1 SV=3
Q9CPQ8	ATP5L_MOUSE	28.16	3	3	29.4214	27.8799	28.9316	28.1263	11425	NBF	ATP synthase subunit g, mitochondrial OS=Mus musculus OX=10090 GN=Atp5mg PE=1 SV=1
P70670	NACAM_MOUSE	6.08	8	8	32.7353	32.7088	32.4581	32.4058	220499	NBF;Oxidation (M)	Nascent polypeptide-associated complex subunit alpha, muscle-specific form OS=Mus musculus OX=10090 GN=Naca PE=1 SV=2
Q3U319	BRE1B_MOUSE	12.99	11	9	25.5195	25.895	25.391	25.6784	113967	Oxidation (M)	E3 ubiquitin-protein ligase BRE1B OS=Mus musculus OX=10090 GN=Rnf40 PE=1 SV=2
Q8BTW9	PAK4_MOUSE	12.98	5	5	25.3778	25.7363	24.9316	25.3477	64623	Acetylation (N-term);Oxidation (M)	Serine/threonine-protein kinase PAK 4 OS=Mus musculus OX=10090 GN=Pak4 PE=1 SV=1
Q7TQ95	LNP_MOUSE	26.12	8	8	27.5969	28.1214	27.7645	27.7708	47500		Endoplasmic reticulum junction formation protein lunapark OS=Mus musculus OX=10090 GN=Lnpk PE=1 SV=1
Q91VR2	ATPG_MOUSE	31.54	7	7	30.0349	30.0609	29.6865	29.8872	32886		ATP synthase subunit gamma, mitochondrial OS=Mus musculus OX=10090 GN=Atp5f1c PE=1 SV=1
Q61554	FBN1_MOUSE	0.87	2	2	21.1478	22.5276	23.6209	23.8093	312298	Oxidation (M)	Fibrillin-1 OS=Mus musculus OX=10090 GN=Fbn1 PE=1 SV=2
Q920L5	ELOV6_MOUSE	4.87	1	1	NaN	19.5582	20.4045	19.4581	31610		Elongation of very long chain fatty acids protein 6 OS=Mus musculus OX=10090 GN=Elovl6 PE=1 SV=1
O88845	AKA10_MOUSE	9.21	3	3	21.0987	20.365	21.762	21.1118	73632		A-kinase anchor protein 10, mitochondrial OS=Mus musculus OX=10090 GN=Akap10 PE=1 SV=3
Q8K012	FBP1L_MOUSE	12.4	6	6	25.8142	26.4738	25.9781	25.2679	69885	Acetylation (N-term);Oxidation (M)	Formin-binding protein 1-like OS=Mus musculus OX=10090 GN=Fnbp1l PE=1 SV=2
P53026	RL10A_MOUSE	25.81	8	8	32.5618	32.947	32.1634	32.7026	24916	NBF;Oxidation (M)	60S ribosomal protein L10a OS=Mus musculus OX=10090 GN=Rpl10a PE=1 SV=3
Q91ZV3	DCBD2_MOUSE	3.9	2	2	22.1727	21.1771	22.1232	21.8201	83774	Oxidation (M)	Discoidin, CUB and LCCL domain-containing protein 2 OS=Mus musculus OX=10090 GN=Dcbld2 PE=1 SV=1
Q9ERV1	MKRN2_MOUSE	2.88	1	1	23.654	24.317	23.4923	24.239	46597		Probable E3 ubiquitin-protein ligase makorin-2 OS=Mus musculus OX=10090 GN=Mkrn2 PE=1 SV=2
P15626	GSTM2_MOUSE	24.31	6	4	24.3645	25.5463	24.7024	24.6703	25717	Oxidation (M)	Glutathione S-transferase Mu 2 OS=Mus musculus OX=10090 GN=Gstm2 PE=1 SV=2
Q8R1A4	DOCK7_MOUSE	26.53	43	41	27.5165	27.7325	26.9428	27.9428	241438	Acetylation (N-term);Oxidation (M)	Dedicator of cytokinesis protein 7 OS=Mus musculus OX=10090 GN=Dock7 PE=1 SV=3
P20060	HEXB_MOUSE	5.78	2	2	23.5165	23.654	24.0443	24.0359	61116		Beta-hexosaminidase subunit beta OS=Mus musculus OX=10090 GN=Hexb PE=1 SV=2
Q9EP71	RAI14_MOUSE	20.22	14	14	27.0401	26.6181	26.673	27.1984	108852	Oxidation (M)	Ankycorbin OS=Mus musculus OX=10090 GN=Rai14 PE=1 SV=1
Q9Z1W9	STK39_MOUSE	9.53	4	3	24.0359	23.4298	24.019	23.5165	60320	Oxidation (M)	STE20/SPS1-related proline-alanine-rich protein kinase OS=Mus musculus OX=10090 GN=Stk39 PE=1 SV=1
B9EKI3	TMF1_MOUSE	6.05	5	5	22.735	23.3376	22.9005	22.8311	121803	Oxidation (M)	TATA element modulatory factor OS=Mus musculus OX=10090 GN=Tmf1 PE=1 SV=2
O88712	CTBP1_MOUSE	13.15	5	4	24.0359	27.2979	26.6595	27.1312	47745	Oxidation (M)	C-terminal-binding protein 1 OS=Mus musculus OX=10090 GN=Ctbp1 PE=1 SV=2
Q6SKR2	N6MT1_MOUSE	17.76	2	2	24.8433	24.3031	24.8142	24.6153	22984		Methyltransferase N6AMT1 OS=Mus musculus OX=10090 GN=N6amt1 PE=1 SV=1
O88986	KBL_MOUSE	29.81	8	8	29.196	29.3088	28.632	28.258	44931	Oxidation (M)	2-amino-3-ketobutyrate coenzyme A ligase, mitochondrial OS=Mus musculus OX=10090 GN=Gcat PE=1 SV=2
Q8CJ53	CIP4_MOUSE	24.21	9	9	26.8264	27.4314	27.4938	28.0349	68489	Oxidation (M)	Cdc42-interacting protein 4 OS=Mus musculus OX=10090 GN=Trip10 PE=1 SV=2
Q91YW3	DNJC3_MOUSE	27.98	7	7	28.0243	27.8799	27.7645	27.7389	57464	Oxidation (M)	DnaJ homolog subfamily C member 3 OS=Mus musculus OX=10090 GN=Dnajc3 PE=1 SV=1
Q5SUE8	ANR40_MOUSE	4.68	1	1	20.3487	18.6345	19.0408	18.4969	40560	Oxidation (M)	Ankyrin repeat domain-containing protein 40 OS=Mus musculus OX=10090 GN=Ankrd40 PE=1 SV=1
Q05860	FMN1_MOUSE	3.41	4	4	23.7594	24.217	23.4923	23.9043	163581		Formin-1 OS=Mus musculus OX=10090 GN=Fmn1 PE=1 SV=2
Q62446	FKBP3_MOUSE	27.68	5	5	28.604	27.7833	28.7958	27.0711	25148	Oxidation (M)	Peptidyl-prolyl cis-trans isomerase FKBP3 OS=Mus musculus OX=10090 GN=Fkbp3 PE=1 SV=2
Q8VBV7	CSN8_MOUSE	41.15	6	6	29.4804	29.8653	29.7597	29.21	23256	Oxidation (M)	COP9 signalosome complex subunit 8 OS=Mus musculus OX=10090 GN=Cops8 PE=1 SV=1
Q99ME9	GTPB4_MOUSE	32.02	17	17	28.5609	29.1263	28.1459	29.1164	74113	Oxidation (M)	GTP-binding protein 4 OS=Mus musculus OX=10090 GN=Gtpbp4 PE=1 SV=3
Q8BU14	SEC62_MOUSE	9.55	3	3	24.895	25.1908	25.1214	24.604	45581	Oxidation (M)	Translocation protein SEC62 OS=Mus musculus OX=10090 GN=Sec62 PE=1 SV=1
Q64525	H2B2B_MOUSE	22.22	18	2	21.9996	22.8166	21.4238	25.0359	13920	Oxidation (M)	Histone H2B type 2-B OS=Mus musculus OX=10090 GN=Hist2h2bb PE=1 SV=3
P14206	RSSA_MOUSE	64.41	19	19	33.4581	34.1604	33.3033	34.0753	32838	Acetylation (N-term);NBF;Oxidation (M)	40S ribosomal protein SA OS=Mus musculus OX=10090 GN=Rpsa PE=1 SV=4
Q8R5K4	NOL6_MOUSE	22.74	15	15	27.141	27.7895	26.8019	27.4785	129228	Oxidation (M)	Nucleolar protein 6 OS=Mus musculus OX=10090 GN=Nol6 PE=2 SV=2
Q8K394	PLCL2_MOUSE	2.57	2	2	22.5516	24.0105	23.8764	23.867	125772		Inactive phospholipase C-like protein 2 OS=Mus musculus OX=10090 GN=Plcl2 PE=1 SV=2
Q9D0W5	PPIL1_MOUSE	18.67	2	2	29.3599	27.611	26.0041	26.7771	18237	Oxidation (M)	Peptidyl-prolyl cis-trans isomerase-like 1 OS=Mus musculus OX=10090 GN=Ppil1 PE=1 SV=1
Q9CQW0	EMC6_MOUSE	10.91	1	1	26.3342	27.141	25.8215	27.5754	12017		ER membrane protein complex subunit 6 OS=Mus musculus OX=10090 GN=Emc6 PE=1 SV=1
P27659	RL3_MOUSE	42.93	16	16	32.2507	32.5911	32.3088	32.4702	46110	NBF;Oxidation (M)	60S ribosomal protein L3 OS=Mus musculus OX=10090 GN=Rpl3 PE=1 SV=3
Q8BUH7	RNF26_MOUSE	3.77	1	1	19.5976	21.5094	19.3486	19.8984	46914		E3 ubiquitin-protein ligase RNF26 OS=Mus musculus OX=10090 GN=Rnf26 PE=2 SV=1
P62340	TBPL1_MOUSE	9.14	1	1	24.1642	25.0975	24.6918	25.5014	20887		TATA box-binding protein-like 1 OS=Mus musculus OX=10090 GN=Tbpl1 PE=1 SV=1
Q9Z0U1	ZO2_MOUSE	33.59	24	24	27.4551	28.1312	27.4473	27.3494	131280	Acetylation (N-term);Oxidation (M)	Tight junction protein ZO-2 OS=Mus musculus OX=10090 GN=Tjp2 PE=1 SV=2
P30999	CTND1_MOUSE	45.63	27	27	29.109	29.6128	29.003	29.3641	104925	Acetylation (N-term);Oxidation (M)	Catenin delta-1 OS=Mus musculus OX=10090 GN=Ctnnd1 PE=1 SV=2
Q812E0	CPEB2_MOUSE	3.84	1	1	22.2904	22.3691	22.0463	NaN	58442		Cytoplasmic polyadenylation element-binding protein 2 OS=Mus musculus OX=10090 GN=Cpeb2 PE=1 SV=1
Q91VK4	ITM2C_MOUSE	16.36	2	2	24.5463	25.1833	25.1293	25.0894	30482		Integral membrane protein 2C OS=Mus musculus OX=10090 GN=Itm2c PE=1 SV=2
Q9QYF1	RDH11_MOUSE	22.15	5	5	25.6513	25.7363	25.4105	25.4738	35148		Retinol dehydrogenase 11 OS=Mus musculus OX=10090 GN=Rdh11 PE=1 SV=2
Q9Z148	EHMT2_MOUSE	12.98	10	10	25.895	26.5014	25.792	26.3118	138039	Oxidation (M)	Histone-lysine N-methyltransferase EHMT2 OS=Mus musculus OX=10090 GN=Ehmt2 PE=1 SV=2
Q7TNG5	EMAL2_MOUSE	2.93	1	1	21.1466	21.7082	21.107	21.5588	70734		Echinoderm microtubule-associated protein-like 2 OS=Mus musculus OX=10090 GN=Eml2 PE=1 SV=1
Q9D6Y7	MSRA_MOUSE	11.16	2	2	23.6757	24.7995	23.9847	23.9316	25988		Mitochondrial peptide methionine sulfoxide reductase OS=Mus musculus OX=10090 GN=Msra PE=1 SV=1
O88874	CCNK_MOUSE	10.83	3	3	26.0691	25.895	25.9248	25.4488	61363		Cyclin-K OS=Mus musculus OX=10090 GN=Ccnk PE=1 SV=3
Q8K201	KCT2_MOUSE	13.9	3	3	26.7895	27.1312	26.8142	27.6798	28050	Oxidation (M)	Keratinocyte-associated transmembrane protein 2 OS=Mus musculus OX=10090 GN=Kct2 PE=1 SV=2
Q8BH69	SPS1_MOUSE	36.22	8	8	27.9372	28.1937	27.7517	27.9484	42907	Oxidation (M)	Selenide, water dikinase 1 OS=Mus musculus OX=10090 GN=Sephs1 PE=1 SV=1
P24288	BCAT1_MOUSE	15.03	5	5	28.9787	29.3828	28.8019	29.2736	42791	Oxidation (M)	Branched-chain-amino-acid aminotransferase, cytosolic OS=Mus musculus OX=10090 GN=Bcat1 PE=1 SV=2
P19783	COX41_MOUSE	43.2	6	6	30.9117	31.3515	30.7927	31.0864	19530	Oxidation (M)	Cytochrome c oxidase subunit 4 isoform 1, mitochondrial OS=Mus musculus OX=10090 GN=Cox4i1 PE=1 SV=2
Q9CRC8	LRC40_MOUSE	38.04	18	18	28.0965	28.1747	27.7708	28.0349	68076	Oxidation (M)	Leucine-rich repeat-containing protein 40 OS=Mus musculus OX=10090 GN=Lrrc40 PE=1 SV=2
E9Q6B2	CC85C_MOUSE	16.67	3	3	27.8799	28.4707	27.6998	26.9316	45334	Acetylation (N-term);NBF	Coiled-coil domain-containing protein 85C OS=Mus musculus OX=10090 GN=Ccdc85c PE=1 SV=1
Q91WD4	CG025_MOUSE	7.36	2	2	23.2961	23.9847	23.391	23.8385	46541		UPF0415 protein C7orf25 homolog OS=Mus musculus OX=10090 PE=2 SV=1
P99024	TBB5_MOUSE	17.79	24	7	34.2828	34.5354	34.6892	33.87	49671	Acetylation (N-term);NBF;Oxidation (M)	Tubulin beta-5 chain OS=Mus musculus OX=10090 GN=Tubb5 PE=1 SV=1
Q9D2Q3	PAAT_MOUSE	6.53	2	2	23.0789	23.5165	22.9082	23.0711	48743	Acetylation (N-term);Oxidation (M)	ATPase PAAT OS=Mus musculus OX=10090 GN=Paat PE=2 SV=1
Q9CQN6	TM14C_MOUSE	50	3	3	27.2979	26.5463	26.9316	27.341	11642	Oxidation (M)	Transmembrane protein 14C OS=Mus musculus OX=10090 GN=Tmem14c PE=1 SV=1
Q9EQM6	DGCR8_MOUSE	8.93	3	3	20.1375	21.5455	23.8093	23.9225	86321	Oxidation (M)	Microprocessor complex subunit DGCR8 OS=Mus musculus OX=10090 GN=Dgcr8 PE=1 SV=2
Q99JH1	RP25L_MOUSE	28.22	2	2	NaN	25.1604	24.2821	24.5105	17675	Oxidation (M)	Ribonuclease P protein subunit p25-like protein OS=Mus musculus OX=10090 GN=Rpp25l PE=1 SV=1
P61620	S61A1_MOUSE	13.87	8	5	29.3217	29.3951	29.114	29.2891	52265	Oxidation (M)	Protein transport protein Sec61 subunit alpha isoform 1 OS=Mus musculus OX=10090 GN=Sec61a1 PE=1 SV=2
Q9CWN7	CNO11_MOUSE	27.92	9	9	28.7864	27.6663	27.2077	28.805	54959	Acetylation (N-term);NBF;Oxidation (M)	CCR4-NOT transcription complex subunit 11 OS=Mus musculus OX=10090 GN=Cnot11 PE=1 SV=1
Q60631	GRB2_MOUSE	37.79	6	6	27.4629	27.2445	27.3066	26.8741	25238	Oxidation (M)	Growth factor receptor-bound protein 2 OS=Mus musculus OX=10090 GN=Grb2 PE=1 SV=1
Q7TNV0	DEK_MOUSE	29.74	9	9	29.7533	30.362	29.341	30.0609	43159	Acetylation (N-term);Oxidation (M)	Protein DEK OS=Mus musculus OX=10090 GN=Dek PE=1 SV=1
Q9WV30	NFAT5_MOUSE	2.87	3	3	24.239	19.5379	23.7492	22.1036	165800		Nuclear factor of activated T-cells 5 OS=Mus musculus OX=10090 GN=Nfat5 PE=1 SV=2
Q8K297	GT251_MOUSE	26.26	12	12	29.3282	29.8623	28.9622	29.7517	71061	Oxidation (M)	Procollagen galactosyltransferase 1 OS=Mus musculus OX=10090 GN=Colgalt1 PE=1 SV=2
P13020	GELS_MOUSE	43.33	25	25	31.5573	31.225	31.4727	31.3828	85942	NBF;Oxidation (M)	Gelsolin OS=Mus musculus OX=10090 GN=Gsn PE=1 SV=3
P11103	PARP1_MOUSE	23.2	18	18	28.9595	29.0839	29.2077	29.4374	113100	Acetylation (N-term);Oxidation (M)	Poly [ADP-ribose] polymerase 1 OS=Mus musculus OX=10090 GN=Parp1 PE=1 SV=3
Q9JLJ5	ELOV1_MOUSE	4.66	1	1	26.509	26.1234	26.8504	26.976	32678	Acetylation (N-term);Oxidation (M)	Elongation of very long chain fatty acids protein 1 OS=Mus musculus OX=10090 GN=Elovl1 PE=1 SV=1
Q9CPX6	ATG3_MOUSE	14.97	4	4	26.6458	25.9738	26.6181	26.0317	35796	Acetylation (N-term);Oxidation (M)	Ubiquitin-like-conjugating enzyme ATG3 OS=Mus musculus OX=10090 GN=Atg3 PE=1 SV=1
Q8CG19	LTBP1_MOUSE	16	18	18	27.8799	26.2077	27.8142	25.7182	186717	NBF;Oxidation (M)	Latent-transforming growth factor beta-binding protein 1 OS=Mus musculus OX=10090 GN=Ltbp1 PE=1 SV=2
Q5SW19	CLU_MOUSE	28.9	26	26	28.7613	29.524	29.9814	30.4919	148068	Oxidation (M)	Clustered mitochondria protein homolog OS=Mus musculus OX=10090 GN=Cluh PE=1 SV=2
Q9JJC6	RIPL1_MOUSE	15.52	4	4	24.217	24.0526	24.2821	24.48	47323	Acetylation (N-term);Oxidation (M)	RILP-like protein 1 OS=Mus musculus OX=10090 GN=Rilpl1 PE=1 SV=1
Q61458	CCNH_MOUSE	22.6	5	5	25.9628	26.9088	25.2607	25.4073	37506	Oxidation (M)	Cyclin-H OS=Mus musculus OX=10090 GN=Ccnh PE=1 SV=2
Q61286	HTF4_MOUSE	13.88	4	4	25.9825	25.6181	25.7771	25.604	75811	Oxidation (M)	Transcription factor 12 OS=Mus musculus OX=10090 GN=Tcf12 PE=1 SV=2
Q80U78	PUM1_MOUSE	12.45	11	10	26.4394	26.8019	26.673	26.8019	126619	Oxidation (M)	Pumilio homolog 1 OS=Mus musculus OX=10090 GN=Pum1 PE=1 SV=2
Q8BRT1	CLAP2_MOUSE	16.41	15	13	25.9495	26.7771	25.965	26.4504	140739	Acetylation (N-term);Oxidation (M)	CLIP-associating protein 2 OS=Mus musculus OX=10090 GN=Clasp2 PE=1 SV=1
Q9Z2Z9	GFPT2_MOUSE	4.55	7	2	20.5635	20.0816	18.7749	19.2701	77009		Glutamine--fructose-6-phosphate aminotransferase [isomerizing] 2 OS=Mus musculus OX=10090 GN=Gfpt2 PE=1 SV=3
Q8BYY4	TT39B_MOUSE	13.61	7	7	26.3811	26.8504	26.0793	26.604	70293	Oxidation (M)	Tetratricopeptide repeat protein 39B OS=Mus musculus OX=10090 GN=Ttc39b PE=1 SV=1
Q9JM14	NT5C_MOUSE	51	7	7	28.0609	27.9484	28.5315	29.579	23076	Oxidation (M)	5'(3')-deoxyribonucleotidase, cytosolic type OS=Mus musculus OX=10090 GN=Nt5c PE=1 SV=1
Q5XG73	ACBD5_MOUSE	7.48	3	3	24.5345	25.2643	24.2821	24.5754	56614	Oxidation (M)	Acyl-CoA-binding domain-containing protein 5 OS=Mus musculus OX=10090 GN=Acbd5 PE=1 SV=1
Q60854	SPB6_MOUSE	56.08	16	16	30.8829	30.94	30.4629	30.7927	42599	Acetylation (N-term);NBF;Oxidation (M)	Serpin B6 OS=Mus musculus OX=10090 GN=Serpinb6 PE=1 SV=1
Q9CQC6	BZW1_MOUSE	33.89	11	9	30.2869	30.5203	29.94	30.2759	48043	Oxidation (M)	Basic leucine zipper and W2 domain-containing protein 1 OS=Mus musculus OX=10090 GN=Bzw1 PE=1 SV=1
Q9CZD3	GARS_MOUSE	34.43	21	21	30.6022	31.4384	30.5203	31.0609	81878	Acetylation (N-term);NBF;Oxidation (M)	Glycine--tRNA ligase OS=Mus musculus OX=10090 GN=Gars1 PE=1 SV=1
Q7TN75	PEG10_MOUSE	9.5	5	5	25.4362	25.8312	25.3031	25.558	109849	Acetylation (N-term);Oxidation (M)	Retrotransposon-derived protein PEG10 OS=Mus musculus OX=10090 GN=Peg10 PE=1 SV=2
Q8K2M0	RM38_MOUSE	7.37	3	3	27.1115	26.341	27.3324	27.3324	45030	Oxidation (M)	39S ribosomal protein L38, mitochondrial OS=Mus musculus OX=10090 GN=Mrpl38 PE=1 SV=2
Q8K3W3	CASC3_MOUSE	8.31	3	3	23.4425	22.4857	23.3101	22.8041	75770		Protein CASC3 OS=Mus musculus OX=10090 GN=Casc3 PE=1 SV=3
Q8CJG0	AGO2_MOUSE	17.33	12	9	26.8504	27.4629	26.7517	27.6458	97304	Acetylation (N-term);Oxidation (M)	Protein argonaute-2 OS=Mus musculus OX=10090 GN=Ago2 PE=1 SV=3
Q62559	IFT52_MOUSE	4.69	1	1	20.3078	18.4564	19.4267	20.0251	48248		Intraflagellar transport protein 52 homolog OS=Mus musculus OX=10090 GN=Ift52 PE=1 SV=2
Q8BU11	TOX4_MOUSE	10.99	4	4	24.654	25.3745	24.7543	25.0526	65961	Oxidation (M)	TOX high mobility group box family member 4 OS=Mus musculus OX=10090 GN=Tox4 PE=1 SV=3
Q80V53	CHSTE_MOUSE	18.09	5	5	25.6153	26.2445	25.7492	25.976	43145		Carbohydrate sulfotransferase 14 OS=Mus musculus OX=10090 GN=Chst14 PE=2 SV=2
Q91ZV0	MIA2_MOUSE	5.66	6	6	24.8044	25.3066	24.7796	25.6153	156461	Oxidation (M)	Melanoma inhibitory activity protein 2 OS=Mus musculus OX=10090 GN=Mia2 PE=1 SV=3
O89091	KLF10_MOUSE	3.34	1	1	20.9417	20.8528	20.8768	21.3035	51756		Krueppel-like factor 10 OS=Mus musculus OX=10090 GN=Klf10 PE=1 SV=1
Q9D9V7	DEN6B_MOUSE	3.25	1	1	22.7895	23.4041	22.8668	23.7995	66588		Protein DENND6B OS=Mus musculus OX=10090 GN=Dennd6b PE=2 SV=3
P24527	LKHA4_MOUSE	43.37	19	19	29.0164	29.6181	28.7864	29.6058	69051	Acetylation (N-term);Oxidation (M)	Leukotriene A-4 hydrolase OS=Mus musculus OX=10090 GN=Lta4h PE=1 SV=4
Q9R1Q9	VAS1_MOUSE	28.51	8	8	26.8019	26.726	26.604	26.8741	51008	Oxidation (M)	V-type proton ATPase subunit S1 OS=Mus musculus OX=10090 GN=Atp6ap1 PE=1 SV=1
P59222	SREC2_MOUSE	4.92	3	3	25.1795	25.5812	25.2714	25.2058	87871	Oxidation (M)	Scavenger receptor class F member 2 OS=Mus musculus OX=10090 GN=Scarf2 PE=1 SV=1
Q7TQE6	MACOI_MOUSE	1.66	1	1	21.4386	NaN	20.8919	20.9722	76088		Macoilin OS=Mus musculus OX=10090 GN=Maco1 PE=1 SV=1
P55302	AMRP_MOUSE	19.72	5	5	26.6181	26.1565	25.9562	25.8215	42215	Oxidation (M)	Alpha-2-macroglobulin receptor-associated protein OS=Mus musculus OX=10090 GN=Lrpap1 PE=1 SV=1
Q60847	COCA1_MOUSE	43.08	94	94	30.9045	32.7109	31.2591	32.5664	340214	Acetylation (N-term);NBF;Oxidation (M)	Collagen alpha-1(XII) chain OS=Mus musculus OX=10090 GN=Col12a1 PE=2 SV=3
Q8BJW6	EIF2A_MOUSE	45.09	19	19	29.1984	29.5463	28.7581	29.17	64403	Oxidation (M)	Eukaryotic translation initiation factor 2A OS=Mus musculus OX=10090 GN=Eif2a PE=1 SV=2
Q5SUF2	LC7L3_MOUSE	18.98	6	6	28.8504	28.9088	28.8355	29.189	51450	Acetylation (N-term);Oxidation (M)	Luc7-like protein 3 OS=Mus musculus OX=10090 GN=Luc7l3 PE=1 SV=1
Q8BG94	COMD7_MOUSE	22	3	3	25.4488	25.6068	24.9225	28.9174	22652		COMM domain-containing protein 7 OS=Mus musculus OX=10090 GN=Commd7 PE=1 SV=1
Q9WV60	GSK3B_MOUSE	27.38	8	6	27.7645	28.4862	27.9088	28.2216	46710		Glycogen synthase kinase-3 beta OS=Mus musculus OX=10090 GN=Gsk3b PE=1 SV=2
Q3TFD2	PCAT1_MOUSE	7.87	3	3	25.0854	24.7024	25.3135	25.4362	59744		Lysophosphatidylcholine acyltransferase 1 OS=Mus musculus OX=10090 GN=Lpcat1 PE=1 SV=1
Q3UDW8	HGNAT_MOUSE	3.66	2	2	24.5754	26.5754	24.6811	25.7745	72504		Heparan-alpha-glucosaminide N-acetyltransferase OS=Mus musculus OX=10090 GN=Hgsnat PE=1 SV=2
P60898	RPB9_MOUSE	30.4	2	2	26.3014	26.2372	26.0975	26.604	14523	Acetylation (N-term);Oxidation (M)	DNA-directed RNA polymerase II subunit RPB9 OS=Mus musculus OX=10090 GN=Polr2i PE=1 SV=1
Q8CII2	CD123_MOUSE	16.37	4	4	26.7771	26.4785	26.5522	26.673	38816		Cell division cycle protein 123 homolog OS=Mus musculus OX=10090 GN=Cdc123 PE=1 SV=2
Q99JH8	ERD21_MOUSE	14.15	2	2	24.2243	25.2821	24.0935	24.7645	24560		ER lumen protein-retaining receptor 1 OS=Mus musculus OX=10090 GN=Kdelr1 PE=1 SV=1
Q9EP53	TSC1_MOUSE	3.27	2	2	20.1657	21.6704	22.058	22.8055	128746	Oxidation (M)	Hamartin OS=Mus musculus OX=10090 GN=Tsc1 PE=1 SV=1
Q8CI71	VPS50_MOUSE	14.42	8	8	24.8764	24.7745	25.1015	24.7895	111174	Oxidation (M)	Syndetin OS=Mus musculus OX=10090 GN=Vps50 PE=1 SV=2
Q8BH97	RCN3_MOUSE	14.63	4	4	20.9451	18.294	23.0622	17.8851	38002	Oxidation (M)	Reticulocalbin-3 OS=Mus musculus OX=10090 GN=Rcn3 PE=1 SV=1
P18111	CDX1_MOUSE	5.22	1	1	18.529	18.3582	18.2176	17.6134	28436		Homeobox protein CDX-1 OS=Mus musculus OX=10090 GN=Cdx1 PE=1 SV=2
Q9CQ79	TXND9_MOUSE	32.3	4	4	27.5969	27.604	26.8504	27.4629	26260	Acetylation (N-term);Oxidation (M)	Thioredoxin domain-containing protein 9 OS=Mus musculus OX=10090 GN=Txndc9 PE=1 SV=1
O35955	PSB10_MOUSE	7.33	1	1	20.9988	21.5238	21.5802	21.686	29063		Proteasome subunit beta type-10 OS=Mus musculus OX=10090 GN=Psmb10 PE=1 SV=1
Q99LE6	ABCF2_MOUSE	29.78	14	14	29.726	29.5627	29.668	29.8623	71782	Oxidation (M)	ATP-binding cassette sub-family F member 2 OS=Mus musculus OX=10090 GN=Abcf2 PE=1 SV=1
Q6IQX7	CHSS2_MOUSE	4.52	2	2	22.8753	23.6757	23.5869	23.632	85534		Chondroitin sulfate synthase 2 OS=Mus musculus OX=10090 GN=Chpf PE=1 SV=1
P70217	HXD13_MOUSE	48.08	8	8	27.2979	27.4785	27.141	27.2979	35889	Acetylation (N-term);NBF;Oxidation (M)	Homeobox protein Hox-D13 OS=Mus musculus OX=10090 GN=Hoxd13 PE=1 SV=2
Q9QZ08	NAGK_MOUSE	16.03	4	4	24.6096	24.5696	23.155	24.5345	37268	Acetylation (N-term)	N-acetyl-D-glucosamine kinase OS=Mus musculus OX=10090 GN=Nagk PE=1 SV=3
Q9DCD0	6PGD_MOUSE	35.61	15	15	31.3776	31.1177	31.225	31.4234	53247	NBF;Oxidation (M)	6-phosphogluconate dehydrogenase, decarboxylating OS=Mus musculus OX=10090 GN=Pgd PE=1 SV=3
Q8R0X2	CACL1_MOUSE	13	3	3	26.3943	26.0148	24.0359	25.7594	42106	Oxidation (M)	CDK2-associated and cullin domain-containing protein 1 OS=Mus musculus OX=10090 GN=Cacul1 PE=2 SV=1
P83887	TBG1_MOUSE	42.35	12	12	27.4551	27.7581	27.2714	28.0243	51101	Oxidation (M)	Tubulin gamma-1 chain OS=Mus musculus OX=10090 GN=Tubg1 PE=1 SV=1
P97390	VPS45_MOUSE	8.77	4	4	25.0567	28.8264	25.2021	25.5014	65053		Vacuolar protein sorting-associated protein 45 OS=Mus musculus OX=10090 GN=Vps45 PE=1 SV=1
Q3V1V3	ESF1_MOUSE	15.98	11	11	26.673	26.4008	26.0894	26.6458	98048	Oxidation (M)	ESF1 homolog OS=Mus musculus OX=10090 GN=Esf1 PE=1 SV=1
Q91YP0	L2HDH_MOUSE	12.5	4	4	24.7441	25.2535	24.895	25.4645	50899		L-2-hydroxyglutarate dehydrogenase, mitochondrial OS=Mus musculus OX=10090 GN=L2hgdh PE=1 SV=1
Q5NC05	TTF2_MOUSE	1.85	2	2	23.3511	22.5456	22.7993	22.809	125530		Transcription termination factor 2 OS=Mus musculus OX=10090 GN=Ttf2 PE=1 SV=2
Q8R1K1	UBAC2_MOUSE	19.71	4	4	26.2188	27.141	26.2499	26.558	39057	Oxidation (M)	Ubiquitin-associated domain-containing protein 2 OS=Mus musculus OX=10090 GN=Ubac2 PE=1 SV=1
Q9ESC8	AFF4_MOUSE	4.66	3	3	21.487	23.2821	21.7054	21.7543	126639	Acetylation (N-term);Oxidation (M)	AF4/FMR2 family member 4 OS=Mus musculus OX=10090 GN=Aff4 PE=1 SV=1
Q923Z3	MTO1_MOUSE	2.09	1	1	25.6403	21.7156	21.3452	22.0604	74332		Protein MTO1 homolog, mitochondrial OS=Mus musculus OX=10090 GN=Mto1 PE=2 SV=1
Q3TWL2	PP4P1_MOUSE	7.75	1	1	24.2679	25.3578	24.604	25.452	30047	Oxidation (M)	Type 1 phosphatidylinositol 4,5-bisphosphate 4-phosphatase OS=Mus musculus OX=10090 GN=Pip4p1 PE=1 SV=1
P42567	EPS15_MOUSE	27.87	15	15	26.2353	25.7492	26.0629	25.6811	98471	Acetylation (N-term);Oxidation (M)	Epidermal growth factor receptor substrate 15 OS=Mus musculus OX=10090 GN=Eps15 PE=1 SV=1
Q8VCA8	SCRN2_MOUSE	24.94	6	6	26.7389	27.391	26.6595	27.0401	46601	Oxidation (M)	Secernin-2 OS=Mus musculus OX=10090 GN=Scrn2 PE=1 SV=1
O54784	DAPK3_MOUSE	19.64	6	6	28.1214	28.7357	27.6181	28.7325	51422	Oxidation (M)	Death-associated protein kinase 3 OS=Mus musculus OX=10090 GN=Dapk3 PE=1 SV=1
Q6ZQ08	CNOT1_MOUSE	25.6	42	42	31.7453	30.9045	31.341	31.4919	266808	Oxidation (M)	CCR4-NOT transcription complex subunit 1 OS=Mus musculus OX=10090 GN=Cnot1 PE=1 SV=2
Q8CIF4	BTD_MOUSE	7.69	2	2	19.7676	21.8774	21.4991	22.1381	58154		Biotinidase OS=Mus musculus OX=10090 GN=Btd PE=1 SV=2
Q8BLX7	COGA1_MOUSE	1.71	2	2	22.9143	23.2961	22.9092	23.0114	155805	Oxidation (M)	Collagen alpha-1(XVI) chain OS=Mus musculus OX=10090 GN=Col16a1 PE=1 SV=2
Q0VEJ0	CEP76_MOUSE	5.01	2	2	23.9672	24.1095	23.2535	25.2499	74303		Centrosomal protein of 76 kDa OS=Mus musculus OX=10090 GN=Cep76 PE=1 SV=1
O08997	ATOX1_MOUSE	19.12	1	1	26.1927	24.4362	25.6891	23.5045	7338		Copper transport protein ATOX1 OS=Mus musculus OX=10090 GN=Atox1 PE=1 SV=1
Q8BLI4	DSE_MOUSE	1.98	1	1	NaN	21.6844	20.6606	20.594	109755		Dermatan-sulfate epimerase OS=Mus musculus OX=10090 GN=Dse PE=2 SV=1
Q8BTH8	KC1G1_MOUSE	2.4	1	1	21.8579	21.5325	21.8237	21.7735	52744		Casein kinase I isoform gamma-1 OS=Mus musculus OX=10090 GN=Csnk1g1 PE=1 SV=2
Q99JY9	ARP3_MOUSE	25.12	9	9	31.325	31.6671	31.0673	31.4727	47357	Oxidation (M)	Actin-related protein 3 OS=Mus musculus OX=10090 GN=Actr3 PE=1 SV=3
O88708	ORC4_MOUSE	12.24	4	4	24.7077	24.6595	24.7846	24.6486	49982		Origin recognition complex subunit 4 OS=Mus musculus OX=10090 GN=Orc4 PE=1 SV=2
Q9EPR5	SORC2_MOUSE	16.22	13	13	26.673	27.6527	26.6595	27.4938	128902	Oxidation (M)	VPS10 domain-containing receptor SorCS2 OS=Mus musculus OX=10090 GN=Sorcs2 PE=1 SV=2
Q8R5A0	SMYD2_MOUSE	11.55	3	3	25.8717	25.3545	25.8528	25.9933	49567		N-lysine methyltransferase SMYD2 OS=Mus musculus OX=10090 GN=Smyd2 PE=1 SV=1
P32233	DRG1_MOUSE	45.23	12	12	29.7178	29.3683	28.3367	29.2216	40512	Oxidation (M)	Developmentally-regulated GTP-binding protein 1 OS=Mus musculus OX=10090 GN=Drg1 PE=1 SV=1
Q9CRC9	GNPI2_MOUSE	17.03	2	2	24.7945	23.867	23.976	24.3844	31084	Oxidation (M)	Glucosamine-6-phosphate isomerase 2 OS=Mus musculus OX=10090 GN=Gnpda2 PE=1 SV=1
P63101	1433Z_MOUSE	54.29	18	13	33.4083	33.015	32.9295	33.1739	27771	Acetylation (N-term);NBF;Oxidation (M)	14-3-3 protein zeta/delta OS=Mus musculus OX=10090 GN=Ywhaz PE=1 SV=1
Q9DBC3	CMTR1_MOUSE	11.23	5	5	25.2058	25.0484	25.2785	25.4202	95676	Oxidation (M)	Cap-specific mRNA (nucleoside-2'-O-)-methyltransferase 1 OS=Mus musculus OX=10090 GN=Cmtr1 PE=1 SV=1
Q9R099	TBL2_MOUSE	23.53	8	8	26.4089	26.673	26.3729	26.5345	49584		Transducin beta-like protein 2 OS=Mus musculus OX=10090 GN=Tbl2 PE=1 SV=2
Q9D0L4	ADCK1_MOUSE	2.86	1	1	20.937	19.4981	20.0421	20.1797	59736	Oxidation (M)	AarF domain-containing protein kinase 1 OS=Mus musculus OX=10090 GN=Adck1 PE=1 SV=1
P97310	MCM2_MOUSE	51.11	34	34	30.0609	30.5664	30.1361	30.5389	102078	Acetylation (N-term);NBF;Oxidation (M)	DNA replication licensing factor MCM2 OS=Mus musculus OX=10090 GN=Mcm2 PE=1 SV=3
Q9WU62	INCE_MOUSE	13.52	6	6	25.3844	24.6703	25.4923	24.9316	101209	Acetylation (N-term)	Inner centromere protein OS=Mus musculus OX=10090 GN=Incenp PE=1 SV=2
Q91WE1	SNX15_MOUSE	23.15	6	6	24.417	24.4425	24.3376	24.5165	37742		Sorting nexin-15 OS=Mus musculus OX=10090 GN=Snx15 PE=1 SV=1
Q8BYR1	TYW4_MOUSE	5.54	2	2	22.5082	21.8582	22.2728	22.7774	75295		tRNA wybutosine-synthesizing protein 4 OS=Mus musculus OX=10090 GN=Lcmt2 PE=2 SV=4
Q8BN78	KAISO_MOUSE	5.22	2	2	21.9932	21.1846	21.3878	20.3493	74050		Transcriptional regulator Kaiso OS=Mus musculus OX=10090 GN=Zbtb33 PE=1 SV=1
Q5BU09	EAPP_MOUSE	5.69	1	1	22.8108	22.2297	22.7864	22.6058	32494		E2F-associated phosphoprotein OS=Mus musculus OX=10090 GN=Eapp PE=1 SV=2
Q3TYA6	MPP8_MOUSE	11.19	5	5	25.2426	25.5255	25.0691	25.9955	97467	Acetylation (N-term);Oxidation (M)	M-phase phosphoprotein 8 OS=Mus musculus OX=10090 GN=Mphosph8 PE=1 SV=1
O55128	SAP18_MOUSE	32.03	3	3	26.2353	26.8858	27.3153	27.1507	17595	Oxidation (M)	Histone deacetylase complex subunit SAP18 OS=Mus musculus OX=10090 GN=Sap18 PE=1 SV=1
Q6P3Y5	Z280C_MOUSE	4.04	2	2	24.1174	25.1642	24.2821	24.9225	83146		Zinc finger protein 280C OS=Mus musculus OX=10090 GN=Znf280c PE=1 SV=1
P30681	HMGB2_MOUSE	36.67	8	8	31.7731	30.9677	31.7129	30.8234	24162	Oxidation (M)	High mobility group protein B2 OS=Mus musculus OX=10090 GN=Hmgb2 PE=1 SV=3
Q0VGM9	RTEL1_MOUSE	4.16	3	3	22.661	22.0517	23.0356	22.9856	133767		Regulator of telomere elongation helicase 1 OS=Mus musculus OX=10090 GN=Rtel1 PE=1 SV=2
Q02013	AQP1_MOUSE	14.5	3	3	27.9484	29.0217	28.2979	28.6898	28793		Aquaporin-1 OS=Mus musculus OX=10090 GN=Aqp1 PE=1 SV=3
Q9JJT0	RCL1_MOUSE	10.19	3	3	26.673	27.1604	26.2589	27.0609	40841		RNA 3'-terminal phosphate cyclase-like protein OS=Mus musculus OX=10090 GN=Rcl1 PE=2 SV=1
Q3SXD3	HDDC2_MOUSE	27.64	4	4	25.9134	26.0359	25.6649	26.3894	22753	Acetylation (N-term);Oxidation (M)	5'-deoxynucleotidase HDDC2 OS=Mus musculus OX=10090 GN=Hddc2 PE=1 SV=1
Q9Z204	HNRPC_MOUSE	39.94	11	11	32.3776	32.2979	31.3879	32.1483	34385	NBF;Oxidation (M)	Heterogeneous nuclear ribonucleoproteins C1/C2 OS=Mus musculus OX=10090 GN=Hnrnpc PE=1 SV=1
Q8VED2	BL1S4_MOUSE	11.63	2	2	23.2961	23.5983	22.2869	23.5869	23112	Acetylation (N-term);Oxidation (M)	Biogenesis of lysosome-related organelles complex 1 subunit 4 OS=Mus musculus OX=10090 GN=Bloc1s4 PE=1 SV=1
Q8BH43	WASF2_MOUSE	8.65	5	4	27.3828	28.0813	27.141	28.0965	54074		Wiskott-Aldrich syndrome protein family member 2 OS=Mus musculus OX=10090 GN=Wasf2 PE=1 SV=1
Q9EQN3	T22D4_MOUSE	19.38	5	5	25.3101	25.1565	25.0894	25.4645	39979	Oxidation (M)	TSC22 domain family protein 4 OS=Mus musculus OX=10090 GN=Tsc22d4 PE=1 SV=2
Q01730	RSU1_MOUSE	37.18	6	6	29.7849	29.6389	29.6881	29.9677	31550		Ras suppressor protein 1 OS=Mus musculus OX=10090 GN=Rsu1 PE=1 SV=3
P42230	STA5A_MOUSE	3.53	9	2	16.6265	22.9717	23.0605	23.1434	90831		Signal transducer and activator of transcription 5A OS=Mus musculus OX=10090 GN=Stat5a PE=1 SV=1
Q8VC57	KCTD5_MOUSE	21.79	4	4	26.3629	27.4154	26.5374	27.3828	26164		BTB/POZ domain-containing protein KCTD5 OS=Mus musculus OX=10090 GN=Kctd5 PE=1 SV=1
O70589	CSKP_MOUSE	4.32	3	3	24.4676	24.7024	24.6865	24.7895	105109	Oxidation (M)	Peripheral plasma membrane protein CASK OS=Mus musculus OX=10090 GN=Cask PE=1 SV=2
Q9QZ73	DCNL1_MOUSE	10.81	2	2	26.0588	24.7492	26.1507	25.4614	30097		DCN1-like protein 1 OS=Mus musculus OX=10090 GN=Dcun1d1 PE=2 SV=1
P56203	CATW_MOUSE	12.13	2	2	20.0077	NaN	21.5396	20.9022	42120	Acetylation (N-term)	Cathepsin W OS=Mus musculus OX=10090 GN=Ctsw PE=2 SV=2
Q99PU8	DHX30_MOUSE	26.54	24	24	25.7695	26.3393	26.1332	26.5898	136668	Oxidation (M)	ATP-dependent RNA helicase DHX30 OS=Mus musculus OX=10090 GN=Dhx30 PE=1 SV=1
Q9CQU3	RER1_MOUSE	28.57	4	4	28.4314	28.524	27.8264	28.3066	22988	Acetylation (N-term);Oxidation (M)	Protein RER1 OS=Mus musculus OX=10090 GN=Rer1 PE=1 SV=1
Q5SU73	COIL_MOUSE	4.74	2	2	23.417	23.7695	23.7286	23.5165	61917		Coilin OS=Mus musculus OX=10090 GN=Coil PE=1 SV=1
O35083	PLCA_MOUSE	15.44	2	2	26.0894	26.5898	25.8093	26.8858	31709	Oxidation (M)	1-acyl-sn-glycerol-3-phosphate acyltransferase alpha OS=Mus musculus OX=10090 GN=Agpat1 PE=1 SV=1
Q9ERN0	SCAM2_MOUSE	9.73	2	2	26.7389	27.604	26.7129	27.4862	36465		Secretory carrier-associated membrane protein 2 OS=Mus musculus OX=10090 GN=Scamp2 PE=1 SV=1
P97298	PEDF_MOUSE	14.87	3	3	27.509	27.2077	26.8504	27.3494	46234		Pigment epithelium-derived factor OS=Mus musculus OX=10090 GN=Serpinf1 PE=1 SV=2
P33609	DPOLA_MOUSE	16.18	15	15	27.6389	27.6458	27.1984	27.7771	167340	Oxidation (M)	DNA polymerase alpha catalytic subunit OS=Mus musculus OX=10090 GN=Pola1 PE=1 SV=2
Q9D1A2	CNDP2_MOUSE	45.89	14	14	28.5646	28.5609	28.5389	28.4354	52767	Oxidation (M)	Cytosolic non-specific dipeptidase OS=Mus musculus OX=10090 GN=Cndp2 PE=1 SV=1
O09000	NCOA3_MOUSE	5.79	6	6	23.3239	23.9584	22.3433	23.9672	151574	Acetylation (N-term);Oxidation (M)	Nuclear receptor coactivator 3 OS=Mus musculus OX=10090 GN=Ncoa3 PE=1 SV=2
Q91YD9	WASL_MOUSE	10.58	3	3	23.1729	22.3244	23.3645	23.1675	54274		Neural Wiskott-Aldrich syndrome protein OS=Mus musculus OX=10090 GN=Wasl PE=1 SV=1
Q5SF07	IF2B2_MOUSE	37.5	18	16	28.5646	28.9622	28.6216	28.3951	65584	Oxidation (M)	Insulin-like growth factor 2 mRNA-binding protein 2 OS=Mus musculus OX=10090 GN=Igf2bp2 PE=1 SV=1
P98083	SHC1_MOUSE	32.99	12	12	26.8623	27.8081	27.3494	26.5754	62608	Oxidation (M)	SHC-transforming protein 1 OS=Mus musculus OX=10090 GN=Shc1 PE=1 SV=3
Q8BHN0	PPM1L_MOUSE	3.61	1	1	21.596	22.1063	22.2645	21.5213	41049		Protein phosphatase 1L OS=Mus musculus OX=10090 GN=Ppm1l PE=1 SV=1
Q8BJL0	SMAL1_MOUSE	8.46	4	4	26.7517	24.8811	24.0275	24.7492	100840	Acetylation (N-term)	SWI/SNF-related matrix-associated actin-dependent regulator of chromatin subfamily A-like protein 1 OS=Mus musculus OX=10090 GN=Smarcal1 PE=1 SV=1
Q99LJ1	FUCO_MOUSE	7.3	2	2	23.5165	23.8764	23.4676	24.391	52281	Oxidation (M)	Tissue alpha-L-fucosidase OS=Mus musculus OX=10090 GN=Fuca1 PE=1 SV=1
Q8BI72	CARF_MOUSE	16.16	6	6	25.1604	26.065	25.3844	25.772	59745	Acetylation (N-term)	CDKN2A-interacting protein OS=Mus musculus OX=10090 GN=Cdkn2aip PE=1 SV=1
A2A432	CUL4B_MOUSE	25.05	23	18	27.2535	28.2353	28.3109	28.8324	110699	Oxidation (M)	Cullin-4B OS=Mus musculus OX=10090 GN=Cul4b PE=1 SV=1
Q9D486	CMIP_MOUSE	2.46	1	1	22.7293	22.1627	22.3906	21.6774	86259		C-Maf-inducing protein OS=Mus musculus OX=10090 GN=Cmip PE=1 SV=3
Q8R3Q6	MIX23_MOUSE	11.81	1	1	26.0547	25.3645	26.0588	25.3511	16665		Protein MIX23 OS=Mus musculus OX=10090 GN=Mix23 PE=1 SV=1
Q9D3E6	STAG1_MOUSE	19.55	18	14	26.1273	26.632	26.0833	28.5278	144440	Acetylation (N-term);Oxidation (M)	Cohesin subunit SA-1 OS=Mus musculus OX=10090 GN=Stag1 PE=1 SV=3
Q7TQK5	CCD93_MOUSE	19.24	8	8	26.5374	26.9088	25.848	27.9088	72603	Oxidation (M)	Coiled-coil domain-containing protein 93 OS=Mus musculus OX=10090 GN=Ccdc93 PE=1 SV=1
Q9CQW9	IFM3_MOUSE	42.34	3	3	27.5536	28.1604	27.4473	27.9923	14954	Acetylation (N-term);Oxidation (M)	Interferon-induced transmembrane protein 3 OS=Mus musculus OX=10090 GN=Ifitm3 PE=1 SV=1
Q8K4G5	ABLM1_MOUSE	3.95	2	2	22.0496	23.0688	23.1558	23.5165	96805		Actin-binding LIM protein 1 OS=Mus musculus OX=10090 GN=Ablim1 PE=1 SV=1
P14685	PSMD3_MOUSE	46.23	22	22	30.4823	29.8534	30.1239	29.8974	60718	NBF;Oxidation (M)	26S proteasome non-ATPase regulatory subunit 3 OS=Mus musculus OX=10090 GN=Psmd3 PE=1 SV=3
P70180	ANPRC_MOUSE	22.2	9	9	26.7517	27.5609	26.604	27.5014	59808	Oxidation (M)	Atrial natriuretic peptide receptor 3 OS=Mus musculus OX=10090 GN=Npr3 PE=1 SV=3
Q9Z2Q6	SEPT5_MOUSE	8.94	2	2	27.0711	27.7645	27.3153	27.3494	42748	Oxidation (M)	Septin-5 OS=Mus musculus OX=10090 GN=Septin5 PE=1 SV=2
Q99LI8	HGS_MOUSE	12.26	6	6	27.5898	27.604	26.8974	27.4314	86015	Oxidation (M)	Hepatocyte growth factor-regulated tyrosine kinase substrate OS=Mus musculus OX=10090 GN=Hgs PE=1 SV=2
Q8K183	PDXK_MOUSE	13.78	3	3	25.3135	25.9066	25.7234	26.0813	35015	Oxidation (M)	Pyridoxal kinase OS=Mus musculus OX=10090 GN=Pdxk PE=1 SV=1
Q8C5L7	RBM34_MOUSE	23.98	7	7	26.673	26.8019	26.4692	26.4073	49116		RNA-binding protein 34 OS=Mus musculus OX=10090 GN=Rbm34 PE=1 SV=2
Q6PEB6	PHOCN_MOUSE	19.56	2	2	24.7745	24.6811	26.1273	23.5165	26032	Oxidation (M)	MOB-like protein phocein OS=Mus musculus OX=10090 GN=Mob4 PE=1 SV=1
Q3U0V1	FUBP2_MOUSE	45.99	27	26	30.9677	31.0479	30.3724	31.2703	76775	Acetylation (N-term);NBF;Oxidation (M)	Far upstream element-binding protein 2 OS=Mus musculus OX=10090 GN=Khsrp PE=1 SV=2
Q8R0G9	NU133_MOUSE	44.42	34	34	27.6931	29.3951	27.7453	28.3239	128620	Acetylation (N-term);Oxidation (M)	Nuclear pore complex protein Nup133 OS=Mus musculus OX=10090 GN=Nup133 PE=1 SV=2
Q9ERS2	NDUAD_MOUSE	47.92	6	6	27.2891	28.1312	27.8385	28.3536	16860	Oxidation (M)	NADH dehydrogenase [ubiquinone] 1 alpha subcomplex subunit 13 OS=Mus musculus OX=10090 GN=Ndufa13 PE=1 SV=3
Q6P5F7	TTYH3_MOUSE	4.77	2	2	25.9088	26.673	25.5551	26.2996	57714	Oxidation (M)	Protein tweety homolog 3 OS=Mus musculus OX=10090 GN=Ttyh3 PE=1 SV=1
B2RXS4	PLXB2_MOUSE	17.86	22	22	26.9088	27.019	26.002	26.0443	206230	Oxidation (M)	Plexin-B2 OS=Mus musculus OX=10090 GN=Plxnb2 PE=1 SV=1
P49717	MCM4_MOUSE	37.24	28	28	30.1724	30.5933	29.9814	31.1361	96736	Oxidation (M)	DNA replication licensing factor MCM4 OS=Mus musculus OX=10090 GN=Mcm4 PE=1 SV=1
Q8BK08	TMM11_MOUSE	8.42	1	1	24.5522	26.4583	26.1312	27.1015	21312		Transmembrane protein 11, mitochondrial OS=Mus musculus OX=10090 GN=Tmem11 PE=1 SV=1
P62334	PRS10_MOUSE	44.22	13	13	30.362	30.4727	30.5296	30.9814	44173	Oxidation (M)	26S proteasome regulatory subunit 10B OS=Mus musculus OX=10090 GN=Psmc6 PE=1 SV=1
Q80VJ2	SRA1_MOUSE	7.76	1	1	26.4186	26.0464	25.654	25.8858	25557		Steroid receptor RNA activator 1 OS=Mus musculus OX=10090 GN=Sra1 PE=1 SV=3
P63037	DNJA1_MOUSE	41.81	11	11	30.3828	30.6964	30.3196	30.4629	44868	Oxidation (M)	DnaJ homolog subfamily A member 1 OS=Mus musculus OX=10090 GN=Dnaja1 PE=1 SV=1
P62281	RS11_MOUSE	31.01	6	6	29.459	29.8324	29.0003	29.3951	18431	NBF;Oxidation (M)	40S ribosomal protein S11 OS=Mus musculus OX=10090 GN=Rps11 PE=1 SV=3
Q80W00	PP1RA_MOUSE	11.04	6	6	25.9271	25.6676	26.0233	24.5045	94372	Oxidation (M)	Serine/threonine-protein phosphatase 1 regulatory subunit 10 OS=Mus musculus OX=10090 GN=Ppp1r10 PE=1 SV=1
Q9CQH8	RPP14_MOUSE	16.39	1	1	23.8093	22.9817	23.7895	22.7913	13565		Ribonuclease P protein subunit p14 OS=Mus musculus OX=10090 GN=Rpp14 PE=1 SV=1
O88851	RBBP9_MOUSE	8.6	1	1	22.2627	21.6355	22.8432	20.7818	20912		Putative hydrolase RBBP9 OS=Mus musculus OX=10090 GN=Rbbp9 PE=1 SV=2
P09405	NUCL_MOUSE	43.85	34	34	33.4823	33.7849	33.1392	33.5527	76723	Acetylation (N-term);NBF;Oxidation (M)	Nucleolin OS=Mus musculus OX=10090 GN=Ncl PE=1 SV=2
Q9CQX4	PAF15_MOUSE	37.27	4	4	25.9157	26.3629	25.3811	25.1293	11993		PCNA-associated factor OS=Mus musculus OX=10090 GN=Pclaf PE=1 SV=1
Q8R2Q8	BST2_MOUSE	6.4	1	1	21.0902	20.1294	20.6345	19.7228	19152		Bone marrow stromal antigen 2 OS=Mus musculus OX=10090 GN=Bst2 PE=1 SV=1
Q9CQ36	DPOE4_MOUSE	56.78	5	5	27.4234	27.5682	26.574	27.1507	12240	Acetylation (N-term);Oxidation (M)	DNA polymerase epsilon subunit 4 OS=Mus musculus OX=10090 GN=Pole4 PE=1 SV=1
Q6PE01	SNR40_MOUSE	57.26	12	12	28.6075	29.0505	28.8385	29.1239	39276	Oxidation (M)	U5 small nuclear ribonucleoprotein 40 kDa protein OS=Mus musculus OX=10090 GN=Snrnp40 PE=1 SV=1
P49446	PTPRE_MOUSE	1.57	2	1	21.9054	22.8429	21.9237	22.7846	80688		Receptor-type tyrosine-protein phosphatase epsilon OS=Mus musculus OX=10090 GN=Ptpre PE=1 SV=3
Q9CYH5	GFOD2_MOUSE	3.9	1	1	18.5133	20.6716	20.8734	20.575	42242		Glucose-fructose oxidoreductase domain-containing protein 2 OS=Mus musculus OX=10090 GN=Gfod2 PE=2 SV=1
Q8C0L8	COG5_MOUSE	7.96	4	4	24.3444	25.0401	27.965	28.6898	91391	Acetylation (N-term);Oxidation (M)	Conserved oligomeric Golgi complex subunit 5 OS=Mus musculus OX=10090 GN=Cog5 PE=1 SV=3
Q9DBX2	PHLP_MOUSE	12.62	2	2	24.239	24.2096	23.9584	24.3307	34407		Phosducin-like protein OS=Mus musculus OX=10090 GN=Pdcl PE=1 SV=1
Q9JIK5	DDX21_MOUSE	44.18	33	33	31.3463	31.9505	31.0737	31.7413	93551	NBF;Oxidation (M)	Nucleolar RNA helicase 2 OS=Mus musculus OX=10090 GN=Ddx21 PE=1 SV=3
Q4PZA2	ECE1_MOUSE	18.6	8	8	26.038	25.9672	25.9473	25.8361	87073	Oxidation (M)	Endothelin-converting enzyme 1 OS=Mus musculus OX=10090 GN=Ece1 PE=1 SV=1
Q8C129	LCAP_MOUSE	26.83	19	19	28.1214	27.6998	27.3066	27.611	117304	Acetylation (N-term);Oxidation (M)	Leucyl-cystinyl aminopeptidase OS=Mus musculus OX=10090 GN=Lnpep PE=1 SV=1
Q60597	ODO1_MOUSE	26.49	17	17	27.341	28.6492	28.0965	28.5609	116449	Oxidation (M)	2-oxoglutarate dehydrogenase, mitochondrial OS=Mus musculus OX=10090 GN=Ogdh PE=1 SV=3
Q7TT79	MCPH1_MOUSE	1.95	1	1	20.8034	21.479	22.0266	20.5079	90373		Microcephalin OS=Mus musculus OX=10090 GN=Mcph1 PE=1 SV=1
Q9R0Z9	RHG07_MOUSE	5.49	3	3	21.0675	21.3143	21.8921	22.5143	123367		Rho GTPase-activating protein 7 OS=Mus musculus OX=10090 GN=Dlc1 PE=1 SV=2
P58854	GCP3_MOUSE	20.55	12	12	26.4202	27.0401	26.0148	26.6998	103469	Oxidation (M)	Gamma-tubulin complex component 3 OS=Mus musculus OX=10090 GN=Tubgcp3 PE=1 SV=2
O35316	SC6A6_MOUSE	7.25	4	3	23.48	25.2571	23.2679	24.7695	69856		Sodium- and chloride-dependent taurine transporter OS=Mus musculus OX=10090 GN=Slc6a6 PE=1 SV=2
P70662	LDB1_MOUSE	7.06	2	2	25.2207	26.0547	25.217	25.7208	46503	Oxidation (M)	LIM domain-binding protein 1 OS=Mus musculus OX=10090 GN=Ldb1 PE=1 SV=2
P18653	KS6A1_MOUSE	11.19	9	6	24.6209	22.9811	24.0609	23.9495	81595	Oxidation (M)	Ribosomal protein S6 kinase alpha-1 OS=Mus musculus OX=10090 GN=Rps6ka1 PE=1 SV=1
P20108	PRDX3_MOUSE	21.4	5	5	29.0788	29.1628	29.094	29.5481	28127		Thioredoxin-dependent peroxide reductase, mitochondrial OS=Mus musculus OX=10090 GN=Prdx3 PE=1 SV=1
B1AY10	NFX1_MOUSE	3.23	2	2	23.3239	24.5165	23.8093	23.9134	123811		Transcriptional repressor NF-X1 OS=Mus musculus OX=10090 GN=Nfx1 PE=1 SV=1
Q8C5H8	NAKD2_MOUSE	14.82	5	5	24.4738	25.5841	24.3511	25.1095	50859		NAD kinase 2, mitochondrial OS=Mus musculus OX=10090 GN=Nadk2 PE=1 SV=2
Q9Z266	SNAPN_MOUSE	25.74	2	2	24.4923	25.4831	24.7645	25.1565	14904	Acetylation (N-term)	SNARE-associated protein Snapin OS=Mus musculus OX=10090 GN=Snapin PE=1 SV=1
P28741	KIF3A_MOUSE	6.99	4	4	24.3578	24.6865	24.2021	24.6757	80170	Oxidation (M)	Kinesin-like protein KIF3A OS=Mus musculus OX=10090 GN=Kif3a PE=1 SV=2
Q8C3R1	BRAT1_MOUSE	12.17	6	6	24.1095	23.2344	24.2463	24.0275	89086	Oxidation (M)	BRCA1-associated ATM activator 1 OS=Mus musculus OX=10090 GN=Brat1 PE=1 SV=1
Q9DB73	NB5R1_MOUSE	34.43	7	7	27.3066	28.0296	26.9088	27.5536	34135	Oxidation (M)	NADH-cytochrome b5 reductase 1 OS=Mus musculus OX=10090 GN=Cyb5r1 PE=1 SV=1
Q8BQY8	HUS1_MOUSE	10.71	2	2	21.8271	22.5517	22.0463	22.7555	31680		Checkpoint protein HUS1 OS=Mus musculus OX=10090 GN=Hus1 PE=2 SV=1
Q6PF93	PK3C3_MOUSE	8.57	5	5	25.8142	26.1604	25.0609	25.9955	101487	Oxidation (M)	Phosphatidylinositol 3-kinase catalytic subunit type 3 OS=Mus musculus OX=10090 GN=Pik3c3 PE=1 SV=1
P97300	NPTN_MOUSE	6.8	3	3	26.965	27.9146	26.7129	27.6663	44373	Oxidation (M)	Neuroplastin OS=Mus musculus OX=10090 GN=Nptn PE=1 SV=3
P63168	DYL1_MOUSE	37.08	2	2	27.6181	27.8019	27.5165	27.2891	10366	NBF;Oxidation (M)	Dynein light chain 1, cytoplasmic OS=Mus musculus OX=10090 GN=Dynll1 PE=1 SV=1
G5E870	TRIPC_MOUSE	23.36	31	31	28.2353	28.4073	27.9977	28.9595	224128	Acetylation (N-term);Oxidation (M)	E3 ubiquitin-protein ligase TRIP12 OS=Mus musculus OX=10090 GN=Trip12 PE=1 SV=1
Q8BIJ7	RUFY1_MOUSE	14.61	6	6	26.2803	25.4073	26.019	26.2408	80376	Acetylation (N-term);NBF	RUN and FYVE domain-containing protein 1 OS=Mus musculus OX=10090 GN=Rufy1 PE=1 SV=1
Q922B2	SYDC_MOUSE	47.9	20	20	30.7211	31.1483	30.4032	31.2365	57147	Oxidation (M)	Aspartate--tRNA ligase, cytoplasmic OS=Mus musculus OX=10090 GN=Dars1 PE=1 SV=2
Q6P1E1	ZMIZ1_MOUSE	3.26	3	3	26.1155	27.1507	25.8093	27.2262	115851	NBF	Zinc finger MIZ domain-containing protein 1 OS=Mus musculus OX=10090 GN=Zmiz1 PE=1 SV=1
P10639	THIO_MOUSE	36.19	4	4	32.4943	32.3802	32.245	32.1901	11675	NBF	Thioredoxin OS=Mus musculus OX=10090 GN=Txn PE=1 SV=3
P35700	PRDX1_MOUSE	45.73	14	12	33.1634	33.6629	32.7373	33.3828	22176	Acetylation (N-term);NBF;Oxidation (M)	Peroxiredoxin-1 OS=Mus musculus OX=10090 GN=Prdx1 PE=1 SV=1
Q60749	KHDR1_MOUSE	20.99	6	6	31.3196	30.5933	31.2647	30.9117	48371	Oxidation (M)	KH domain-containing, RNA-binding, signal transduction-associated protein 1 OS=Mus musculus OX=10090 GN=Khdrbs1 PE=1 SV=2
P99027	RLA2_MOUSE	69.57	5	5	31.0927	30.5389	31.015	29.788	11651		60S acidic ribosomal protein P2 OS=Mus musculus OX=10090 GN=Rplp2 PE=1 SV=3
Q811U4	MFN1_MOUSE	9.58	5	5	25.0567	26.8858	26.3273	27.2714	83726	Oxidation (M)	Mitofusin-1 OS=Mus musculus OX=10090 GN=Mfn1 PE=1 SV=3
P41778	PBX1_MOUSE	17.91	3	3	24.5404	24.9316	24.6431	24.5345	46626	Acetylation (N-term);Oxidation (M)	Pre-B-cell leukemia transcription factor 1 OS=Mus musculus OX=10090 GN=Pbx1 PE=1 SV=2
Q91YH5	ATLA3_MOUSE	43.44	15	15	28.4976	29.1795	28.4976	29.2422	60575	Oxidation (M)	Atlastin-3 OS=Mus musculus OX=10090 GN=Atl3 PE=1 SV=1
Q8VI75	IPO4_MOUSE	22.37	18	18	28.995	29.7581	28.611	29.5555	119275	Acetylation (N-term);NBF;Oxidation (M)	Importin-4 OS=Mus musculus OX=10090 GN=Ipo4 PE=1 SV=1
O35231	KIFC3_MOUSE	1.21	1	1	18.1452	18.9777	NaN	19.0455	92556		Kinesin-like protein KIFC3 OS=Mus musculus OX=10090 GN=Kifc3 PE=1 SV=4
Q3UJD6	UBP19_MOUSE	16.54	14	14	27.1015	27.3828	27.3578	27.5969	150549	Acetylation (N-term);NBF;Oxidation (M)	Ubiquitin carboxyl-terminal hydrolase 19 OS=Mus musculus OX=10090 GN=Usp19 PE=1 SV=1
Q3UHX0	NOL8_MOUSE	16.65	12	12	26.7129	27.3662	26.8385	29.019	128635	Acetylation (N-term);Oxidation (M)	Nucleolar protein 8 OS=Mus musculus OX=10090 GN=Nol8 PE=1 SV=2
Q8VC31	CCDC9_MOUSE	6.26	3	3	26.3629	26.8858	25.8312	26.632	61445		Coiled-coil domain-containing protein 9 OS=Mus musculus OX=10090 GN=Ccdc9 PE=1 SV=1
Q6PGN1	ERFE_MOUSE	25.29	4	4	24.7129	24.6649	25.3778	25.5522	36265		Erythroferrone OS=Mus musculus OX=10090 GN=Erfe PE=1 SV=1
Q8C1Y8	CCZ1_MOUSE	10	4	4	24.0275	24.5983	23.8191	24.4425	55505	Oxidation (M)	Vacuolar fusion protein CCZ1 homolog OS=Mus musculus OX=10090 GN=Ccz1 PE=1 SV=1
Q501J2	ANKMT_MOUSE	13.97	2	2	21.2852	22.0164	22.9063	21.6246	24740	Acetylation (N-term);Oxidation (M)	Adenine nucleotide translocase lysine N-methyltransferase OS=Mus musculus OX=10090 GN=Antkmt PE=1 SV=1
Q925I1	ATAD3_MOUSE	34.01	15	15	28.8741	29.189	28.6629	29.4571	66742	Oxidation (M)	ATPase family AAA domain-containing protein 3 OS=Mus musculus OX=10090 GN=Atad3 PE=1 SV=1
Q9Z277	BAZ1B_MOUSE	18.8	20	20	28.6355	29.1984	28.3787	29.0505	170651	Oxidation (M)	Tyrosine-protein kinase BAZ1B OS=Mus musculus OX=10090 GN=Baz1b PE=1 SV=2
P00416	COX3_MOUSE	5.36	1	1	26.3014	25.7208	25.7821	25.6703	29923		Cytochrome c oxidase subunit 3 OS=Mus musculus OX=10090 GN=mt-Co3 PE=1 SV=2
P35601	RFC1_MOUSE	15.92	13	13	27.0609	27.509	27.5165	27.5682	125985	Oxidation (M)	Replication factor C subunit 1 OS=Mus musculus OX=10090 GN=Rfc1 PE=1 SV=2
Q61142	SPIN1_MOUSE	9.54	2	2	24.417	24.6971	23.6971	24.6703	29643	Oxidation (M)	Spindlin-1 OS=Mus musculus OX=10090 GN=Spin1 PE=1 SV=2
P14602	HSPB1_MOUSE	44.5	7	7	28.4274	28.6527	29.0737	28.5718	23014		Heat shock protein beta-1 OS=Mus musculus OX=10090 GN=Hspb1 PE=1 SV=3
Q8R0S2	IQEC1_MOUSE	6.76	4	4	23.976	24.1795	24.2607	24.3578	108015		IQ motif and SEC7 domain-containing protein 1 OS=Mus musculus OX=10090 GN=Iqsec1 PE=1 SV=2
Q99KV1	DJB11_MOUSE	34.08	10	10	29.3217	29.6407	29.2647	29.3807	40555	Oxidation (M)	DnaJ homolog subfamily B member 11 OS=Mus musculus OX=10090 GN=Dnajb11 PE=1 SV=1
Q9CZU4	ERAL1_MOUSE	11.9	3	3	23.2821	24.0609	24.3778	24.4298	48187		GTPase Era, mitochondrial OS=Mus musculus OX=10090 GN=Eral1 PE=2 SV=1
Q9DD03	RAB13_MOUSE	14.36	2	2	24.7846	25.2499	24.4984	24.9584	22770	Oxidation (M)	Ras-related protein Rab-13 OS=Mus musculus OX=10090 GN=Rab13 PE=1 SV=1
P26883	FKB1A_MOUSE	34.26	3	3	29.3473	28.6005	30.0609	28.5352	11923	Acetylation (N-term);Oxidation (M)	Peptidyl-prolyl cis-trans isomerase FKBP1A OS=Mus musculus OX=10090 GN=Fkbp1a PE=1 SV=2
Q80WB5	NTAQ1_MOUSE	4.78	1	1	22.307	22.8977	22.5152	22.3602	24336		Protein N-terminal glutamine amidohydrolase OS=Mus musculus OX=10090 GN=Ntaq1 PE=1 SV=1
Q9D0L7	ARM10_MOUSE	21.9	4	4	24.1015	24.8385	24.2463	24.3511	33311		Armadillo repeat-containing protein 10 OS=Mus musculus OX=10090 GN=Armc10 PE=1 SV=1
Q6IQX8	ZN219_MOUSE	10.06	3	3	21.5684	22.0938	21.5766	22.414	77796		Zinc finger protein 219 OS=Mus musculus OX=10090 GN=Znf219 PE=1 SV=1
P70403	CASP_MOUSE	7.96	8	3	24.6209	24.7895	25.5725	24.9406	77269	Oxidation (M)	Protein CASP OS=Mus musculus OX=10090 GN=Cux1 PE=1 SV=2
Q7TMW6	CIAO3_MOUSE	17.65	4	4	23.5869	24.3645	23.3778	24.1253	53108		Cytosolic iron-sulfur assembly component 3 OS=Mus musculus OX=10090 GN=Ciao3 PE=1 SV=2
Q80WT5	AFTIN_MOUSE	10.31	6	6	23.6757	22.8071	23.417	22.679	101131	Oxidation (M)	Aftiphilin OS=Mus musculus OX=10090 GN=Aftph PE=1 SV=2
Q8VDU0	GPSM2_MOUSE	17.97	7	7	24.7695	24.8528	24.7745	24.918	75591		G-protein-signaling modulator 2 OS=Mus musculus OX=10090 GN=Gpsm2 PE=1 SV=2
Q62348	TSN_MOUSE	28.95	8	8	29.6831	30.196	29.391	29.846	26201		Translin OS=Mus musculus OX=10090 GN=Tsn PE=1 SV=1
P60843	IF4A1_MOUSE	44.83	27	18	32.9063	32.8347	32.6198	32.7313	46154	NBF;Oxidation (M)	Eukaryotic initiation factor 4A-I OS=Mus musculus OX=10090 GN=Eif4a1 PE=1 SV=1
Q9ER88	RT29_MOUSE	28.39	8	8	27.5315	27.7325	27.0711	27.726	44699		28S ribosomal protein S29, mitochondrial OS=Mus musculus OX=10090 GN=Dap3 PE=1 SV=1
Q6ZPG2	WDR90_MOUSE	2.29	3	3	22.7036	22.8338	22.5072	22.8833	202972	Acetylation (N-term)	WD repeat-containing protein 90 OS=Mus musculus OX=10090 GN=Wdr90 PE=1 SV=2
P35282	RAB21_MOUSE	31.08	5	5	27.3066	27.9977	27.5826	28.5052	24106	Oxidation (M)	Ras-related protein Rab-21 OS=Mus musculus OX=10090 GN=Rab21 PE=1 SV=4
Q8K1A6	C2D1A_MOUSE	13.68	7	7	25.6486	27.3153	24.9716	26.9869	103698	Oxidation (M)	Coiled-coil and C2 domain-containing protein 1A OS=Mus musculus OX=10090 GN=Cc2d1a PE=1 SV=2
Q8K2C9	HACD3_MOUSE	16.57	5	5	27.8974	27.8623	27.8019	29.0505	43131		Very-long-chain (3R)-3-hydroxyacyl-CoA dehydratase 3 OS=Mus musculus OX=10090 GN=Hacd3 PE=1 SV=2
P02468	LAMC1_MOUSE	18.17	22	22	28.6285	29.1239	28.267	28.726	177298	Acetylation (N-term);Oxidation (M)	Laminin subunit gamma-1 OS=Mus musculus OX=10090 GN=Lamc1 PE=1 SV=2
Q8K2I9	FBH1_MOUSE	1.44	1	1	19.6369	21.7488	21.0812	21.6463	118298		F-box DNA helicase 1 OS=Mus musculus OX=10090 GN=Fbh1 PE=1 SV=1
Q91X52	DCXR_MOUSE	11.07	2	2	22.0263	22.717	21.8258	22.333	25746		L-xylulose reductase OS=Mus musculus OX=10090 GN=Dcxr PE=1 SV=2
Q6NXH8	MET25_MOUSE	4.02	1	1	21.3945	20.634	21.6638	22.5553	66736		Methyltransferase-like protein 25 OS=Mus musculus OX=10090 GN=Mettl25 PE=2 SV=1
O54781	SRPK2_MOUSE	1.76	2	1	23.0554	23.867	23.2821	22.7063	76757		SRSF protein kinase 2 OS=Mus musculus OX=10090 GN=Srpk2 PE=1 SV=2
Q8K4Q6	NEIL1_MOUSE	4.37	1	1	17.9161	20.6773	NaN	20.9702	43586	Oxidation (M)	Endonuclease 8-like 1 OS=Mus musculus OX=10090 GN=Neil1 PE=2 SV=3
Q9ERG2	STRN3_MOUSE	24.37	14	14	28.5014	28.1065	27.9595	28.0762	87150	Oxidation (M)	Striatin-3 OS=Mus musculus OX=10090 GN=Strn3 PE=1 SV=1
Q9DBL9	ABHD5_MOUSE	9.4	2	2	20.4857	23.632	22.9858	24.2021	39155		1-acylglycerol-3-phosphate O-acyltransferase ABHD5 OS=Mus musculus OX=10090 GN=Abhd5 PE=1 SV=1
Q8CH77	NAV1_MOUSE	2.03	2	2	19.8696	22.0713	17.0177	15.4183	202368		Neuron navigator 1 OS=Mus musculus OX=10090 GN=Nav1 PE=1 SV=2
Q9WU60	ATRN_MOUSE	3.29	2	2	21.3208	22.8677	22.4254	20.9888	158058	Oxidation (M)	Attractin OS=Mus musculus OX=10090 GN=Atrn PE=1 SV=3
Q5SXI5	ZN496_MOUSE	3.25	1	1	20.4811	20.5288	20.8119	21.2315	66577		Zinc finger protein 496 OS=Mus musculus OX=10090 GN=Znf496 PE=1 SV=1
Q9D8S9	BOLA1_MOUSE	33.58	3	3	26.8741	27.2979	26.673	27.0505	14379	Acetylation (N-term)	BolA-like protein 1 OS=Mus musculus OX=10090 GN=Bola1 PE=1 SV=1
P59325	IF5_MOUSE	30.54	10	10	28.3662	29.3044	28.2759	29.6475	48968	Oxidation (M)	Eukaryotic translation initiation factor 5 OS=Mus musculus OX=10090 GN=Eif5 PE=1 SV=1
Q80ZI1	TRNP1_MOUSE	11.21	1	1	21.5641	23.9933	18.7919	22.3016	23086	Acetylation (N-term);NBF	TMF-regulated nuclear protein 1 OS=Mus musculus OX=10090 GN=Trnp1 PE=1 SV=1
Q9DBZ5	EIF3K_MOUSE	34.4	5	5	29.8218	30.6198	30.6458	30.3724	25087	Oxidation (M)	Eukaryotic translation initiation factor 3 subunit K OS=Mus musculus OX=10090 GN=Eif3k PE=1 SV=1
Q3THK3	T2FA_MOUSE	17.91	6	6	28.0349	28.7676	27.4473	28.066	57241	Acetylation (N-term);Oxidation (M)	General transcription factor IIF subunit 1 OS=Mus musculus OX=10090 GN=Gtf2f1 PE=1 SV=2
Q8C551	R51A1_MOUSE	5.34	1	1	23.7594	24.275	23.8093	22.937	36227		RAD51-associated protein 1 OS=Mus musculus OX=10090 GN=Rad51ap1 PE=1 SV=2
Q8VD75	HIP1_MOUSE	23.13	15	15	26.8741	27.5826	26.9088	27.8445	115202	Oxidation (M)	Huntingtin-interacting protein 1 OS=Mus musculus OX=10090 GN=Hip1 PE=1 SV=2
Q921H9	COA7_MOUSE	5.63	1	1	25.9293	26.3795	25.2891	26.0338	25617	Acetylation (N-term)	Cytochrome c oxidase assembly factor 7 OS=Mus musculus OX=10090 GN=Coa7 PE=1 SV=1
Q9QZB7	ARP10_MOUSE	13.19	4	4	26.7645	26.4598	26.2643	26.4473	46208	Oxidation (M)	Actin-related protein 10 OS=Mus musculus OX=10090 GN=Actr10 PE=1 SV=2
Q99KW3	TARA_MOUSE	3.97	7	6	25.3712	26.2133	25.4645	26.1681	223368	Oxidation (M)	TRIO and F-actin-binding protein OS=Mus musculus OX=10090 GN=Triobp PE=1 SV=3
Q9JM93	AR6P4_MOUSE	5.24	1	1	20.4281	19.8922	18.9378	19.1121	25525		ADP-ribosylation factor-like protein 6-interacting protein 4 OS=Mus musculus OX=10090 GN=Arl6ip4 PE=1 SV=1
Q3UM18	LSG1_MOUSE	20.5	9	9	26.632	27.2891	26.2535	27.2714	73157	Oxidation (M)	Large subunit GTPase 1 homolog OS=Mus musculus OX=10090 GN=Lsg1 PE=1 SV=2
Q9D6J3	YJU2_MOUSE	3.18	1	1	18.0373	19.3509	17.4601	NaN	35988		Splicing factor YJU2 OS=Mus musculus OX=10090 GN=Yju2 PE=1 SV=1
Q08274	DMWD_MOUSE	4.21	2	2	25.9847	26.0547	26.0338	26.2077	69816	NBF	Dystrophia myotonica WD repeat-containing protein OS=Mus musculus OX=10090 GN=Dmwd PE=1 SV=3
Q6P542	ABCF1_MOUSE	24.61	16	16	29.1386	29.362	28.7771	28.8974	94945	Oxidation (M)	ATP-binding cassette sub-family F member 1 OS=Mus musculus OX=10090 GN=Abcf1 PE=1 SV=1
Q9CQ56	USE1_MOUSE	4.07	1	1	23.9672	23.976	23.391	23.9847	30594		Vesicle transport protein USE1 OS=Mus musculus OX=10090 GN=Use1 PE=1 SV=1
Q9DCT1	AKCL2_MOUSE	24.25	6	5	24.1871	24.9628	23.6096	24.5105	34461	Acetylation (N-term);Oxidation (M)	1,5-anhydro-D-fructose reductase OS=Mus musculus OX=10090 GN=Akr1e2 PE=1 SV=1
Q6X893	CTL1_MOUSE	8.88	4	4	23.1813	24.9628	24.6264	25.4953	73067		Choline transporter-like protein 1 OS=Mus musculus OX=10090 GN=Slc44a1 PE=1 SV=3
Q8CEE7	RDH13_MOUSE	7.19	1	1	23.0208	22.4116	23.6865	23.1145	36464		Retinol dehydrogenase 13 OS=Mus musculus OX=10090 GN=Rdh13 PE=1 SV=1
Q63943	MEF2D_MOUSE	6.03	4	3	24.7182	24.7846	24.2463	25.2207	55065		Myocyte-specific enhancer factor 2D OS=Mus musculus OX=10090 GN=Mef2d PE=1 SV=2
O70472	TM131_MOUSE	10.97	15	15	26.9869	27.3992	26.3762	27.5754	204651	Acetylation (N-term);NBF	Transmembrane protein 131 OS=Mus musculus OX=10090 GN=Tmem131 PE=2 SV=2
Q99L90	MCRS1_MOUSE	5.63	2	2	20.0683	23.1429	17.9494	22.3851	51692		Microspherule protein 1 OS=Mus musculus OX=10090 GN=Mcrs1 PE=1 SV=1
O08663	MAP2_MOUSE	26.36	10	10	28.3745	28.6492	28.0453	28.2535	52922	Acetylation (N-term);Oxidation (M)	Methionine aminopeptidase 2 OS=Mus musculus OX=10090 GN=Metap2 PE=1 SV=1
Q9QYK7	RNF11_MOUSE	11.04	1	1	22.1957	22.4588	22.1331	22.6013	17458		RING finger protein 11 OS=Mus musculus OX=10090 GN=Rnf11 PE=1 SV=1
Q8BV79	TRNK1_MOUSE	0.43	1	1	27.5826	28.0137	26.0894	27.1795	343320		TPR and ankyrin repeat-containing protein 1 OS=Mus musculus OX=10090 GN=Trank1 PE=2 SV=3
Q9D379	HYEP_MOUSE	21.32	8	8	26.7129	26.2372	26.4969	25.4645	52577	Oxidation (M)	Epoxide hydrolase 1 OS=Mus musculus OX=10090 GN=Ephx1 PE=1 SV=2
Q9Z199	SPT4B_MOUSE	13.68	1	1	23.9847	22.4288	23.9316	23.8576	13194		Transcription elongation factor SPT4-B OS=Mus musculus OX=10090 GN=Supt4h1b PE=2 SV=1
Q9CR26	VTA1_MOUSE	16.83	4	4	27.673	28.3662	27.726	28.217	33913	Acetylation (N-term);Oxidation (M)	Vacuolar protein sorting-associated protein VTA1 homolog OS=Mus musculus OX=10090 GN=Vta1 PE=1 SV=1
P23242	CXA1_MOUSE	23.82	5	5	28.4551	28.249	28.189	28.2759	43004	Oxidation (M)	Gap junction alpha-1 protein OS=Mus musculus OX=10090 GN=Gja1 PE=1 SV=2
Q9QUI0	RHOA_MOUSE	12.44	2	1	24.3031	23.5983	24.7441	23.8385	21782		Transforming protein RhoA OS=Mus musculus OX=10090 GN=Rhoa PE=1 SV=1
Q60715	P4HA1_MOUSE	50	17	17	30.7533	30.8682	30.5844	30.9746	60910	Oxidation (M)	Prolyl 4-hydroxylase subunit alpha-1 OS=Mus musculus OX=10090 GN=P4ha1 PE=1 SV=2
P63325	RS10_MOUSE	46.06	7	7	33.1468	33.715	33.0283	33.6735	18916	Acetylation (N-term);NBF;Oxidation (M)	40S ribosomal protein S10 OS=Mus musculus OX=10090 GN=Rps10 PE=1 SV=1
Q7TMY7	IPO8_MOUSE	12.18	8	8	25.0732	25.2499	24.3239	25.0567	117078	Oxidation (M)	Importin-8 OS=Mus musculus OX=10090 GN=Ipo8 PE=1 SV=3
Q8R1J9	TOR2A_MOUSE	15.26	3	3	25.1642	25.0609	24.7129	25.8904	35897	Oxidation (M)	Torsin-2A OS=Mus musculus OX=10090 GN=Tor2a PE=1 SV=1
Q9Z0H7	BCL10_MOUSE	25.75	3	3	27.7958	27.5754	27.5898	27.189	25948	Acetylation (N-term);Oxidation (M)	B-cell lymphoma/leukemia 10 OS=Mus musculus OX=10090 GN=Bcl10 PE=1 SV=1
O70309	ITB5_MOUSE	6.77	4	4	24.7995	25.9606	24.7441	25.8433	87909	Oxidation (M)	Integrin beta-5 OS=Mus musculus OX=10090 GN=Itgb5 PE=1 SV=2
E9Q5G3	KIF23_MOUSE	23.61	16	16	27.4707	27.3745	26.8264	27.2262	108776	Oxidation (M)	Kinesin-like protein KIF23 OS=Mus musculus OX=10090 GN=Kif23 PE=1 SV=1
P68433	H31_MOUSE	66.18	11	11	35.3135	35.6088	34.8234	35.2999	15404	NBF;Oxidation (M)	Histone H3.1 OS=Mus musculus OX=10090 GN=H3c1 PE=1 SV=2
Q60864	STIP1_MOUSE	53.04	29	29	32.3006	32.5085	31.5343	32.1453	62582	Acetylation (N-term);NBF;Oxidation (M)	Stress-induced-phosphoprotein 1 OS=Mus musculus OX=10090 GN=Stip1 PE=1 SV=1
Q3UEB3	PUF60_MOUSE	53.55	20	20	31.4871	31.5062	30.6022	31.0017	60249	Acetylation (N-term);Oxidation (M)	Poly(U)-binding-splicing factor PUF60 OS=Mus musculus OX=10090 GN=Puf60 PE=1 SV=2
P63073	IF4E_MOUSE	31.34	6	6	28.6458	28.4512	28.6898	28.019	25053	Acetylation (N-term);Oxidation (M)	Eukaryotic translation initiation factor 4E OS=Mus musculus OX=10090 GN=Eif4e PE=1 SV=1
P25425	PO2F1_MOUSE	2.6	1	1	22.0442	19.5068	21.7279	21.3213	79547		POU domain, class 2, transcription factor 1 OS=Mus musculus OX=10090 GN=Pou2f1 PE=1 SV=3
O88477	IF2B1_MOUSE	32.41	17	16	29.0003	29.094	28.7096	28.6964	63451	Acetylation (N-term);Oxidation (M)	Insulin-like growth factor 2 mRNA-binding protein 1 OS=Mus musculus OX=10090 GN=Igf2bp1 PE=1 SV=1
P47757	CAPZB_MOUSE	29.24	7	7	30.4032	30.4727	30.0609	30.2077	31345	Oxidation (M)	F-actin-capping protein subunit beta OS=Mus musculus OX=10090 GN=Capzb PE=1 SV=3
Q8BMB0	EMSY_MOUSE	3.32	2	2	19.4467	17.2632	21.3107	NaN	135291	Oxidation (M)	BRCA2-interacting transcriptional repressor EMSY OS=Mus musculus OX=10090 GN=Emsy PE=1 SV=2
Q80W68	KIRR1_MOUSE	22.69	12	12	26.5448	27.189	27.1795	26.9316	87176	Oxidation (M)	Kin of IRRE-like protein 1 OS=Mus musculus OX=10090 GN=Kirrel1 PE=1 SV=1
A6X919	D19L1_MOUSE	9.52	4	4	25.3307	26.4394	25.3545	26.3359	84187		Probable C-mannosyltransferase DPY19L1 OS=Mus musculus OX=10090 GN=Dpy19l1 PE=1 SV=1
P07742	RIR1_MOUSE	41.16	18	18	29.391	29.94	29.1459	29.2353	90210	Acetylation (N-term);NBF;Oxidation (M)	Ribonucleoside-diphosphate reductase large subunit OS=Mus musculus OX=10090 GN=Rrm1 PE=1 SV=2
Q9CQJ4	RING2_MOUSE	9.82	3	2	26.3222	27.2714	26.5255	26.965	37623		E3 ubiquitin-protein ligase RING2 OS=Mus musculus OX=10090 GN=Rnf2 PE=1 SV=1
Q8CH18	CCAR1_MOUSE	10.99	8	8	27.4707	26.9539	27.1984	26.9428	132060	Oxidation (M)	Cell division cycle and apoptosis regulator protein 1 OS=Mus musculus OX=10090 GN=Ccar1 PE=1 SV=1
Q8BWG8	ARRB1_MOUSE	8.37	2	2	22.4368	24.4105	22.3223	23.8093	46973		Beta-arrestin-1 OS=Mus musculus OX=10090 GN=Arrb1 PE=1 SV=1
Q62233	SIX3_MOUSE	5.71	1	1	26.604	27.391	25.1371	27.9484	35593	Acetylation (N-term)	Homeobox protein SIX3 OS=Mus musculus OX=10090 GN=Six3 PE=1 SV=2
Q9R1C6	DGKE_MOUSE	2.3	1	1	17.0357	21.2809	22.4583	20.9777	63635		Diacylglycerol kinase epsilon OS=Mus musculus OX=10090 GN=Dgke PE=1 SV=1
P00375	DYR_MOUSE	41.71	5	5	29.3971	29.4113	29.249	29.3346	21606	Oxidation (M)	Dihydrofolate reductase OS=Mus musculus OX=10090 GN=Dhfr PE=1 SV=3
Q8VC34	RPAP2_MOUSE	2.61	1	1	21.9257	23.4041	22.9839	22.2595	68530		Putative RNA polymerase II subunit B1 CTD phosphatase Rpap2 OS=Mus musculus OX=10090 GN=Rpap2 PE=2 SV=2
Q91W92	BORG5_MOUSE	29.34	7	7	28.5014	29.0479	28.4512	28.1842	43096	Oxidation (M)	Cdc42 effector protein 1 OS=Mus musculus OX=10090 GN=Cdc42ep1 PE=1 SV=1
Q9CZ28	SNF8_MOUSE	4.65	1	1	25.3612	25.5374	24.918	24.8288	28886		Vacuolar-sorting protein SNF8 OS=Mus musculus OX=10090 GN=Snf8 PE=1 SV=1
O08795	GLU2B_MOUSE	21.31	9	9	30.2869	30.5109	29.7739	29.995	58793	Oxidation (M)	Glucosidase 2 subunit beta OS=Mus musculus OX=10090 GN=Prkcsh PE=1 SV=1
Q8BMJ3	IF1AX_MOUSE	14.58	2	2	29.6527	29.5481	29.2077	29.1532	16460		Eukaryotic translation initiation factor 1A, X-chromosomal OS=Mus musculus OX=10090 GN=Eif1ax PE=2 SV=3
Q64739	COBA2_MOUSE	3.97	4	3	23.5522	21.7481	23.3376	24.4551	171535	Acetylation (N-term)	Collagen alpha-2(XI) chain OS=Mus musculus OX=10090 GN=Col11a2 PE=2 SV=3
P21550	ENOB_MOUSE	27.88	10	7	27.9203	28.217	27.726	28.2077	47025	Acetylation (N-term);Oxidation (M)	Beta-enolase OS=Mus musculus OX=10090 GN=Eno3 PE=1 SV=3
Q9CW46	RAVR1_MOUSE	65.51	27	27	29.341	29.4214	29.0965	29.1483	79382	Acetylation (N-term);Oxidation (M)	Ribonucleoprotein PTB-binding 1 OS=Mus musculus OX=10090 GN=Raver1 PE=1 SV=2
O09012	PEX5_MOUSE	25.98	10	10	27.1984	27.1984	26.3342	27.391	70756	Oxidation (M)	Peroxisomal targeting signal 1 receptor OS=Mus musculus OX=10090 GN=Pex5 PE=1 SV=2
Q9CPY1	RM51_MOUSE	13.28	1	1	22.2271	24.5983	22.9052	24.3578	15103		39S ribosomal protein L51, mitochondrial OS=Mus musculus OX=10090 GN=Mrpl51 PE=1 SV=1
Q6S7F2	E2F7_MOUSE	1.44	1	1	20.2713	NaN	21.7515	20.861	99535		Transcription factor E2F7 OS=Mus musculus OX=10090 GN=E2f7 PE=1 SV=1
Q62470	ITA3_MOUSE	23.17	15	15	28.611	28.877	28.1115	29.0864	116745	Acetylation (N-term);NBF;Oxidation (M)	Integrin alpha-3 OS=Mus musculus OX=10090 GN=Itga3 PE=1 SV=1
Q9R1E0	FOXO1_MOUSE	5.37	2	2	25.0317	25.1681	24.4298	25.2607	69518	Acetylation (N-term);Oxidation (M)	Forkhead box protein O1 OS=Mus musculus OX=10090 GN=Foxo1 PE=1 SV=2
Q9CQB5	CISD2_MOUSE	20.74	2	2	24.867	24.2961	24.5812	24.6431	15242		CDGSH iron-sulfur domain-containing protein 2 OS=Mus musculus OX=10090 GN=Cisd2 PE=1 SV=1
Q9JLM8	DCLK1_MOUSE	3.17	2	2	23.9043	24.9539	24.7077	25.7024	84153		Serine/threonine-protein kinase DCLK1 OS=Mus musculus OX=10090 GN=Dclk1 PE=1 SV=1
Q8CFX1	G6PE_MOUSE	9.51	5	5	25.0233	25.9716	25.5696	25.6513	88928		GDH/6PGL endoplasmic bifunctional protein OS=Mus musculus OX=10090 GN=H6pd PE=1 SV=2
P22437	PGH1_MOUSE	2.33	1	1	23.3376	23.5983	23.0928	23.6431	69042		Prostaglandin G/H synthase 1 OS=Mus musculus OX=10090 GN=Ptgs1 PE=1 SV=1
A2AIV2	VIR_MOUSE	6.68	10	10	25.8167	24.654	24.7389	25.5315	201439	Oxidation (M)	Protein virilizer homolog OS=Mus musculus OX=10090 GN=Virma PE=1 SV=1
Q91YU8	SSF1_MOUSE	21.49	5	5	26.2643	26.7895	25.8264	26.7517	52756	Oxidation (M)	Suppressor of SWI4 1 homolog OS=Mus musculus OX=10090 GN=Ppan PE=1 SV=2
Q920A7	AFG31_MOUSE	17.49	10	10	25.2714	26.425	26.1681	25.989	87047	Acetylation (N-term);Oxidation (M)	AFG3-like protein 1 OS=Mus musculus OX=10090 GN=Afg3l1 PE=1 SV=2
Q9QY06	MYO9B_MOUSE	15.28	21	21	25.6757	27.509	25.989	26.1115	238834	Acetylation (N-term);Oxidation (M)	Unconventional myosin-IXb OS=Mus musculus OX=10090 GN=Myo9b PE=1 SV=2
P22315	HEMH_MOUSE	18.81	5	5	25.6237	26.1214	25.9428	26.4551	47130	Oxidation (M)	Ferrochelatase, mitochondrial OS=Mus musculus OX=10090 GN=Fech PE=1 SV=2
O88491	NSD1_MOUSE	2.16	3	3	23.8576	24.2317	23.4551	23.9134	284084		Histone-lysine N-methyltransferase, H3 lysine-36 specific OS=Mus musculus OX=10090 GN=Nsd1 PE=1 SV=1
Q3UM45	PP1R7_MOUSE	49.58	13	13	28.3951	28.3828	27.8974	28.2445	41292	Acetylation (N-term);Oxidation (M)	Protein phosphatase 1 regulatory subunit 7 OS=Mus musculus OX=10090 GN=Ppp1r7 PE=1 SV=2
P58771	TPM1_MOUSE	23.59	21	6	31.2979	31.7211	30.9677	31.7047	32681	Oxidation (M)	Tropomyosin alpha-1 chain OS=Mus musculus OX=10090 GN=Tpm1 PE=1 SV=1
Q6NVF9	CPSF6_MOUSE	14.88	5	5	29.5808	29.6964	29.158	29.3869	59153	Oxidation (M)	Cleavage and polyadenylation specificity factor subunit 6 OS=Mus musculus OX=10090 GN=Cpsf6 PE=1 SV=1
Q8VD12	Z385A_MOUSE	4.15	1	1	22.8308	24.019	22.6581	22.5103	40447		Zinc finger protein 385A OS=Mus musculus OX=10090 GN=Znf385a PE=1 SV=2
Q9JHW4	SELB_MOUSE	13.89	6	6	25.8409	26.4769	25.6458	26.1642	63539	Oxidation (M)	Selenocysteine-specific elongation factor OS=Mus musculus OX=10090 GN=Eefsec PE=1 SV=2
Q8K3Z9	PO121_MOUSE	4.5	4	4	25.2243	24.3444	24.848	24.6918	121022	Oxidation (M)	Nuclear envelope pore membrane protein POM 121 OS=Mus musculus OX=10090 GN=Pom121 PE=1 SV=2
Q9CZT8	RAB3B_MOUSE	23.29	3	3	24.5285	24.7895	24.7338	25.002	24757	Oxidation (M)	Ras-related protein Rab-3B OS=Mus musculus OX=10090 GN=Rab3b PE=1 SV=1
P20152	VIME_MOUSE	81.76	48	43	35.386	35.515	35.1491	35.3135	53688	Acetylation (N-term);NBF;Oxidation (M)	Vimentin OS=Mus musculus OX=10090 GN=Vim PE=1 SV=3
Q6PGH1	BUD31_MOUSE	26.39	5	5	24.5404	25.1015	25.9977	25.2058	17000		Protein BUD31 homolog OS=Mus musculus OX=10090 GN=Bud31 PE=1 SV=2
Q9WV68	DECR2_MOUSE	14.38	3	3	23.6431	24.5165	23.9584	24.2607	31300		Peroxisomal 2,4-dienoyl-CoA reductase [(3E)-enoyl-CoA-producing] OS=Mus musculus OX=10090 GN=Decr2 PE=1 SV=1
P35290	RAB24_MOUSE	13.79	2	2	23.2821	23.6096	23.5404	23.1976	23144		Ras-related protein Rab-24 OS=Mus musculus OX=10090 GN=Rab24 PE=1 SV=2
Q3UGR5	HDHD2_MOUSE	44.02	6	6	24.7594	24.7024	25.4105	25.6264	28730		Haloacid dehalogenase-like hydrolase domain-containing protein 2 OS=Mus musculus OX=10090 GN=Hdhd2 PE=1 SV=2
Q80U87	UBP8_MOUSE	19.54	12	12	25.5075	26.3662	25.6865	26.0338	122611	Oxidation (M)	Ubiquitin carboxyl-terminal hydrolase 8 OS=Mus musculus OX=10090 GN=Usp8 PE=1 SV=2
Q8K114	INT9_MOUSE	8.97	3	3	22.3554	22.8175	23.0655	22.6153	74078	Oxidation (M)	Integrator complex subunit 9 OS=Mus musculus OX=10090 GN=Ints9 PE=1 SV=1
Q9D753	EXOS8_MOUSE	31.88	5	5	27.7645	28.1065	27.5389	27.9814	29949		Exosome complex component RRP43 OS=Mus musculus OX=10090 GN=Exosc8 PE=1 SV=1
P02469	LAMB1_MOUSE	19.32	28	28	29.3131	29.1312	29.0889	29.2123	197090	Acetylation (N-term);NBF;Oxidation (M)	Laminin subunit beta-1 OS=Mus musculus OX=10090 GN=Lamb1 PE=1 SV=3
Q99L13	3HIDH_MOUSE	21.49	5	5	28.4785	29.49	27.9484	29.109	35440	Oxidation (M)	3-hydroxyisobutyrate dehydrogenase, mitochondrial OS=Mus musculus OX=10090 GN=Hibadh PE=1 SV=1
Q9EQU5	SET_MOUSE	50.87	10	10	32.2591	32.4284	31.4967	31.8081	33378		Protein SET OS=Mus musculus OX=10090 GN=Set PE=1 SV=1
Q8R2W9	PANK3_MOUSE	13.78	3	3	25.797	26.1814	25.8385	25.7695	41120	Oxidation (M)	Pantothenate kinase 3 OS=Mus musculus OX=10090 GN=Pank3 PE=1 SV=1
O08915	AIP_MOUSE	26.36	6	6	28.2714	28.6285	28.0401	28.3992	37605	Oxidation (M)	AH receptor-interacting protein OS=Mus musculus OX=10090 GN=Aip PE=1 SV=1
Q8CBY8	DCTN4_MOUSE	30.84	8	8	27.8385	28.0401	27.8324	28.0084	53057		Dynactin subunit 4 OS=Mus musculus OX=10090 GN=Dctn4 PE=1 SV=1
Q8CH72	TRI32_MOUSE	20.76	10	10	26.9539	28.203	25.8433	27.6527	72057	Acetylation (N-term);Oxidation (M)	E3 ubiquitin-protein ligase TRIM32 OS=Mus musculus OX=10090 GN=Trim32 PE=1 SV=2
P70175	DLG3_MOUSE	7.89	4	4	23.5754	24.4362	24.2021	24.7234	93482		Disks large homolog 3 OS=Mus musculus OX=10090 GN=Dlg3 PE=1 SV=1
Q8C3W1	CA198_MOUSE	48.76	11	11	28.0401	28.8264	27.4785	28.1556	35316	Acetylation (N-term);Oxidation (M)	Uncharacterized protein C1orf198 homolog OS=Mus musculus OX=10090 PE=1 SV=1
Q8BMQ3	BNC2_MOUSE	5.15	3	3	21.3196	NaN	21.9878	20.6686	125335	Oxidation (M)	Zinc finger protein basonuclin-2 OS=Mus musculus OX=10090 GN=Bnc2 PE=1 SV=3
Q8BK75	ELP6_MOUSE	13.53	3	3	24.1015	23.225	24.217	23.4551	29327	Oxidation (M)	Elongator complex protein 6 OS=Mus musculus OX=10090 GN=Elp6 PE=2 SV=1
Q9CW03	SMC3_MOUSE	29.75	30	30	28.7357	28.9344	28.5646	28.7096	141556	Oxidation (M)	Structural maintenance of chromosomes protein 3 OS=Mus musculus OX=10090 GN=Smc3 PE=1 SV=2
Q9ESV0	DDX24_MOUSE	21.7	15	15	25.6838	25.824	25.5374	25.6458	96429	Oxidation (M)	ATP-dependent RNA helicase DDX24 OS=Mus musculus OX=10090 GN=Ddx24 PE=1 SV=2
Q9R061	NUBP2_MOUSE	19.27	4	4	26.204	26.8385	26.4425	27.2445	29518		Cytosolic Fe-S cluster assembly factor NUBP2 OS=Mus musculus OX=10090 GN=Nubp2 PE=1 SV=1
Q91VZ6	SMAP1_MOUSE	9.09	3	3	26.4378	27.2445	26.4488	27.0609	47660		Stromal membrane-associated protein 1 OS=Mus musculus OX=10090 GN=Smap1 PE=1 SV=1
Q9Z2F7	BNI3L_MOUSE	6.88	1	1	19.5737	NaN	19.6143	22.9862	23766		BCL2/adenovirus E1B 19 kDa protein-interacting protein 3-like OS=Mus musculus OX=10090 GN=Bnip3l PE=1 SV=1
Q9D4V0	EKI1_MOUSE	7.16	2	2	22.8658	21.7599	22.2666	21.6376	41984		Ethanolamine kinase 1 OS=Mus musculus OX=10090 GN=Etnk1 PE=1 SV=2
Q8R3C6	RBM19_MOUSE	18.28	11	11	26.6181	26.5433	26.2607	26.5225	106083	Oxidation (M)	Probable RNA-binding protein 19 OS=Mus musculus OX=10090 GN=Rbm19 PE=1 SV=1
E9Q555	RN213_MOUSE	14.91	56	56	27.6865	28.019	27.9088	28.2935	584784	Oxidation (M)	E3 ubiquitin-protein ligase RNF213 OS=Mus musculus OX=10090 GN=Rnf213 PE=1 SV=2
Q921L3	TMCO1_MOUSE	15.43	2	2	20.3775	24.1719	24.5345	24.8717	21175		Calcium load-activated calcium channel OS=Mus musculus OX=10090 GN=Tmco1 PE=1 SV=1
P28033	CEBPB_MOUSE	4.39	1	1	21.7037	21.9785	20.0449	21.5355	31446		CCAAT/enhancer-binding protein beta OS=Mus musculus OX=10090 GN=Cebpb PE=1 SV=1
Q8R3W5	SEN15_MOUSE	21.43	2	2	24.4614	24.0854	24.7745	23.9933	18530	Oxidation (M)	tRNA-splicing endonuclease subunit Sen15 OS=Mus musculus OX=10090 GN=Tsen15 PE=1 SV=1
O70475	UGDH_MOUSE	48.68	19	19	29.6713	30.393	29.0003	30.0217	54832	NBF;Oxidation (M)	UDP-glucose 6-dehydrogenase OS=Mus musculus OX=10090 GN=Ugdh PE=1 SV=1
Q9DCE5	PK1IP_MOUSE	34.55	8	8	27.9316	27.5609	27.6181	28.2891	42116	Oxidation (M)	p21-activated protein kinase-interacting protein 1 OS=Mus musculus OX=10090 GN=Pak1ip1 PE=1 SV=2
Q922U1	PRPF3_MOUSE	21.08	8	8	27.6998	27.7325	27.1604	27.4234	77455	Oxidation (M)	U4/U6 small nuclear ribonucleoprotein Prp3 OS=Mus musculus OX=10090 GN=Prpf3 PE=1 SV=1
Q9D385	AR2BP_MOUSE	7.36	1	1	23.0409	22.6575	22.5563	22.0367	18754		ADP-ribosylation factor-like protein 2-binding protein OS=Mus musculus OX=10090 GN=Arl2bp PE=1 SV=1
Q61329	ZFHX3_MOUSE	1.83	5	4	26.065	26.3031	24.867	27.0609	406570	NBF;Oxidation (M)	Zinc finger homeobox protein 3 OS=Mus musculus OX=10090 GN=Zfhx3 PE=1 SV=1
Q8C1Q6	SMIM4_MOUSE	15	1	1	19.7918	19.5903	19.0176	20.41	9746		Small integral membrane protein 4 OS=Mus musculus OX=10090 GN=Smim4 PE=1 SV=2
Q9JJX7	TYDP2_MOUSE	9.73	2	2	20.1429	23.2535	22.59	22.6737	41034	Acetylation (N-term);Oxidation (M)	Tyrosyl-DNA phosphodiesterase 2 OS=Mus musculus OX=10090 GN=Tdp2 PE=1 SV=1
Q62167	DDX3X_MOUSE	47.89	30	29	31.2365	31.8534	31.3088	31.8271	73101	Acetylation (N-term);NBF;Oxidation (M)	ATP-dependent RNA helicase DDX3X OS=Mus musculus OX=10090 GN=Ddx3x PE=1 SV=3
Q8VDN2	AT1A1_MOUSE	24.54	38	26	31.2759	31.933	31.1604	31.8347	112982	Acetylation (N-term);NBF;Oxidation (M)	Sodium/potassium-transporting ATPase subunit alpha-1 OS=Mus musculus OX=10090 GN=Atp1a1 PE=1 SV=1
Q9JJZ4	UB2J1_MOUSE	25.16	5	5	27.9484	28.2803	28.4707	29.1263	34990	Oxidation (M)	Ubiquitin-conjugating enzyme E2 J1 OS=Mus musculus OX=10090 GN=Ube2j1 PE=1 SV=2
P56480	ATPB_MOUSE	78.64	31	31	33.3956	34.2478	33.1828	33.8792	56300	Acetylation (N-term);NBF;Oxidation (M)	ATP synthase subunit beta, mitochondrial OS=Mus musculus OX=10090 GN=Atp5f1b PE=1 SV=2
P31001	DESM_MOUSE	4.9	7	2	23.6209	24.002	24.848	23.7895	53498	Acetylation (N-term)	Desmin OS=Mus musculus OX=10090 GN=Des PE=1 SV=3
Q9CYR0	SSBP_MOUSE	19.74	2	2	24.6431	23.4676	23.5522	22.5008	17319	Oxidation (M)	Single-stranded DNA-binding protein, mitochondrial OS=Mus musculus OX=10090 GN=Ssbp1 PE=1 SV=1
Q9QUR7	PIN1_MOUSE	41.82	5	5	28.9031	28.7357	28.2123	28.9428	18370	Acetylation (N-term);Oxidation (M)	Peptidyl-prolyl cis-trans isomerase NIMA-interacting 1 OS=Mus musculus OX=10090 GN=Pin1 PE=1 SV=1
Q61026	NCOA2_MOUSE	0.89	1	1	20.5269	21.6779	19.5126	21.5667	158466		Nuclear receptor coactivator 2 OS=Mus musculus OX=10090 GN=Ncoa2 PE=1 SV=3
Q8R422	CD109_MOUSE	22.82	19	19	28.0453	27.9484	27.1984	28.5352	161659	Oxidation (M)	CD109 antigen OS=Mus musculus OX=10090 GN=Cd109 PE=1 SV=1
Q6Y685	TACC1_MOUSE	6.85	4	4	24.417	24.8858	23.0779	24.217	83952	Oxidation (M)	Transforming acidic coiled-coil-containing protein 1 OS=Mus musculus OX=10090 GN=Tacc1 PE=1 SV=1
Q9D1L9	LTOR5_MOUSE	48.35	3	3	24.8288	24.8044	24.8093	23.3645	9642	Acetylation (N-term);Oxidation (M)	Ragulator complex protein LAMTOR5 OS=Mus musculus OX=10090 GN=Lamtor5 PE=1 SV=1
Q9EPS3	GLCE_MOUSE	4.37	2	2	20.8746	21.6578	20.0969	21.0048	70089		D-glucuronyl C5-epimerase OS=Mus musculus OX=10090 GN=Glce PE=1 SV=2
Q921H8	THIKA_MOUSE	41.27	11	11	29.9117	30.3088	29.5609	30.7047	43953	Acetylation (N-term);NBF;Oxidation (M)	3-ketoacyl-CoA thiolase A, peroxisomal OS=Mus musculus OX=10090 GN=Acaa1a PE=1 SV=1
Q6PGL7	WASC2_MOUSE	38.01	28	28	27.9316	27.019	27.3239	26.8385	145311	Acetylation (N-term);NBF;Oxidation (M)	WASH complex subunit 2 OS=Mus musculus OX=10090 GN=Washc2 PE=1 SV=1
P68254	1433T_MOUSE	40	12	8	31.4775	30.9117	30.7047	30.7373	27778	Acetylation (N-term);Oxidation (M)	14-3-3 protein theta OS=Mus musculus OX=10090 GN=Ywhaq PE=1 SV=1
Q9DCC8	TOM20_MOUSE	22.76	2	2	28.3992	29.0965	28.1065	28.7486	16284		Mitochondrial import receptor subunit TOM20 homolog OS=Mus musculus OX=10090 GN=Tomm20 PE=1 SV=1
Q60751	IGF1R_MOUSE	6.12	5	5	23.6096	25.2096	23.8385	24.9672	155788	Oxidation (M)	Insulin-like growth factor 1 receptor OS=Mus musculus OX=10090 GN=Igf1r PE=1 SV=3
Q8CI33	C19L1_MOUSE	16.57	6	6	26.2426	26.0547	25.9495	26.0148	60193		CWF19-like protein 1 OS=Mus musculus OX=10090 GN=Cwf19l1 PE=1 SV=2
Q91V12	BACH_MOUSE	35.17	9	9	30.362	30.3724	30.0609	30.1483	42537	NBF;Oxidation (M)	Cytosolic acyl coenzyme A thioester hydrolase OS=Mus musculus OX=10090 GN=Acot7 PE=1 SV=2
Q8C570	RAE1L_MOUSE	26.9	6	6	27.8445	28.5898	27.8623	28.249	40965	Acetylation (N-term);Oxidation (M)	mRNA export factor OS=Mus musculus OX=10090 GN=Rae1 PE=1 SV=1
P62075	TIM13_MOUSE	31.58	2	2	25.0526	25.217	25.3239	25.0401	10458	Acetylation (N-term);Oxidation (M)	Mitochondrial import inner membrane translocase subunit Tim13 OS=Mus musculus OX=10090 GN=Timm13 PE=1 SV=1
P51410	RL9_MOUSE	54.17	9	9	32.1239	31.5343	32.1021	31.7731	21881	NBF	60S ribosomal protein L9 OS=Mus musculus OX=10090 GN=Rpl9 PE=1 SV=2
Q9DCZ4	MIC26_MOUSE	45.96	5	5	27.1015	27.5754	26.8019	27.4707	22604	Oxidation (M)	MICOS complex subunit Mic26 OS=Mus musculus OX=10090 GN=Apoo PE=1 SV=2
Q3THK7	GUAA_MOUSE	52.09	27	27	30.099	30.5844	29.7927	30.4334	76723	Oxidation (M)	GMP synthase [glutamine-hydrolyzing] OS=Mus musculus OX=10090 GN=Gmps PE=1 SV=2
Q9DCN1	NUD12_MOUSE	3.9	1	1	20.3331	19.0969	19.971	21.3281	51511	Oxidation (M)	NAD-capped RNA hydrolase NUDT12 OS=Mus musculus OX=10090 GN=Nudt12 PE=1 SV=1
Q9D7V9	NAAA_MOUSE	13.54	3	3	23.4298	22.3427	23.7895	22.7259	40075		N-acylethanolamine-hydrolyzing acid amidase OS=Mus musculus OX=10090 GN=Naaa PE=1 SV=2
Q8VD00	SGMR2_MOUSE	6.82	1	1	22.967	21.7414	24.2317	22.5865	20811	Oxidation (M)	Sigma intracellular receptor 2 OS=Mus musculus OX=10090 GN=Tmem97 PE=1 SV=1
Q9JJ78	TOPK_MOUSE	15.76	5	5	28.1556	28.8474	27.9088	28.6424	36745	Acetylation (N-term);Oxidation (M)	Lymphokine-activated killer T-cell-originated protein kinase OS=Mus musculus OX=10090 GN=Pbk PE=1 SV=1
Q62351	TFR1_MOUSE	34.86	23	23	29.3557	29.94	29.2714	29.7292	85731	Oxidation (M)	Transferrin receptor protein 1 OS=Mus musculus OX=10090 GN=Tfrc PE=1 SV=1
P58389	PTPA_MOUSE	35.91	7	7	28.17	27.3745	28.2399	27.5389	36710		Serine/threonine-protein phosphatase 2A activator OS=Mus musculus OX=10090 GN=Ptpa PE=1 SV=1
Q8K1S3	UNC5B_MOUSE	19.05	10	10	26.9539	26.673	27.0711	26.604	103739		Netrin receptor UNC5B OS=Mus musculus OX=10090 GN=Unc5b PE=1 SV=1
Q7TN98	CPEB4_MOUSE	2.74	1	1	22.2904	22.3691	22.0463	NaN	80122		Cytoplasmic polyadenylation element-binding protein 4 OS=Mus musculus OX=10090 GN=Cpeb4 PE=1 SV=1
Q8CF66	LTOR4_MOUSE	10.1	1	1	25.705	26.8504	25.7995	26.8741	10678	Acetylation (N-term)	Ragulator complex protein LAMTOR4 OS=Mus musculus OX=10090 GN=Lamtor4 PE=1 SV=2
Q91YR9	PTGR1_MOUSE	13.68	3	3	25.4362	25.9316	24.7286	25.6944	35560	Oxidation (M)	Prostaglandin reductase 1 OS=Mus musculus OX=10090 GN=Ptgr1 PE=1 SV=2
A2A8L1	CHD5_MOUSE	0.51	10	1	22.219	24.141	21.7455	24.0526	222515		Chromodomain-helicase-DNA-binding protein 5 OS=Mus musculus OX=10090 GN=Chd5 PE=1 SV=1
P28063	PSB8_MOUSE	13.04	3	3	25.141	25.6403	25.3679	25.4008	30260		Proteasome subunit beta type-8 OS=Mus musculus OX=10090 GN=Psmb8 PE=1 SV=2
P29341	PABP1_MOUSE	50.79	25	25	32.5481	32.0832	32.0864	32.1753	70671	Acetylation (N-term);NBF;Oxidation (M)	Polyadenylate-binding protein 1 OS=Mus musculus OX=10090 GN=Pabpc1 PE=1 SV=2
Q9JLJ2	AL9A1_MOUSE	17.41	7	7	27.632	27.8142	27.5165	27.9595	53515	Acetylation (N-term);Oxidation (M)	4-trimethylaminobutyraldehyde dehydrogenase OS=Mus musculus OX=10090 GN=Aldh9a1 PE=1 SV=1
Q80T69	RSBN1_MOUSE	2.01	1	1	22.0966	22.3762	21.7602	NaN	89251		Lysine-specific demethylase 9 OS=Mus musculus OX=10090 GN=Rsbn1 PE=1 SV=3
P10493	NID1_MOUSE	3.94	3	3	25.3031	26.2133	25.7208	25.6838	136538	Oxidation (M)	Nidogen-1 OS=Mus musculus OX=10090 GN=Nid1 PE=1 SV=2
Q3UPE3	RMI2_MOUSE	11.41	1	1	23.1724	24.0609	22.6094	24.7286	15838	Acetylation (N-term)	RecQ-mediated genome instability protein 2 OS=Mus musculus OX=10090 GN=Rmi2 PE=2 SV=1
Q9R1X4	TIM_MOUSE	14.62	11	11	26.6181	27.6931	25.8811	27.2625	137503	Oxidation (M)	Protein timeless homolog OS=Mus musculus OX=10090 GN=Timeless PE=1 SV=3
Q9JI75	NQO2_MOUSE	37.23	5	5	26.2607	26.0443	25.9977	24.0609	26248	Oxidation (M)	Ribosyldihydronicotinamide dehydrogenase [quinone] OS=Mus musculus OX=10090 GN=Nqo2 PE=1 SV=3
Q8BYK6	YTHD3_MOUSE	16.92	9	7	28.0084	27.141	27.9484	27.8324	63961	Oxidation (M)	YTH domain-containing family protein 3 OS=Mus musculus OX=10090 GN=Ythdf3 PE=1 SV=2
P97864	CASP7_MOUSE	7.59	1	1	22.7379	23.8576	NaN	22.3421	34061		Caspase-7 OS=Mus musculus OX=10090 GN=Casp7 PE=1 SV=2
Q61214	DYR1A_MOUSE	7.47	4	4	24.417	24.7234	24.391	24.0443	85494		Dual specificity tyrosine-phosphorylation-regulated kinase 1A OS=Mus musculus OX=10090 GN=Dyrk1a PE=1 SV=1
Q91WA6	SHRPN_MOUSE	6.05	1	1	20.7256	20.8199	20.4768	21.7761	39852		Sharpin OS=Mus musculus OX=10090 GN=Sharpin PE=1 SV=1
Q91VU7	PUS7_MOUSE	34.39	16	16	28.2077	27.965	27.8203	27.7833	74793	Oxidation (M)	Pseudouridylate synthase 7 homolog OS=Mus musculus OX=10090 GN=Pus7 PE=2 SV=2
Q8K2T8	PAF1_MOUSE	28.97	11	11	26.9203	26.7645	26.673	26.7389	60518	Oxidation (M)	RNA polymerase II-associated factor 1 homolog OS=Mus musculus OX=10090 GN=Paf1 PE=1 SV=1
Q91W86	VPS11_MOUSE	10.63	6	6	25.1984	25.239	25.2021	24.8288	107719	Oxidation (M)	Vacuolar protein sorting-associated protein 11 homolog OS=Mus musculus OX=10090 GN=Vps11 PE=1 SV=3
A3KGV1	ODFP2_MOUSE	1.33	1	1	20.2588	18.4105	19.4874	20.4383	95541		Outer dense fiber protein 2 OS=Mus musculus OX=10090 GN=Odf2 PE=1 SV=1
Q9CX34	SGT1_MOUSE	39.58	11	11	28.8474	28.3536	28.8264	28.9456	38159	Oxidation (M)	Protein SGT1 homolog OS=Mus musculus OX=10090 GN=Sugt1 PE=1 SV=3
Q8BNE1	TCAF1_MOUSE	6.93	3	3	23.0138	21.2316	22.466	21.0564	102735	Oxidation (M)	TRPM8 channel-associated factor 1 OS=Mus musculus OX=10090 GN=Tcaf1 PE=2 SV=1
P32883	RASK_MOUSE	4.76	4	1	24.7846	25.8118	24.5225	25.9111	21656		GTPase KRas OS=Mus musculus OX=10090 GN=Kras PE=1 SV=1
Q7TPW1	NEXN_MOUSE	12.19	6	6	26.2517	26.0793	25.6458	26.0588	72108	Oxidation (M)	Nexilin OS=Mus musculus OX=10090 GN=Nexn PE=1 SV=3
P99029	PRDX5_MOUSE	37.62	7	7	30.1842	30.2979	30.2077	30.7129	21897	Oxidation (M)	Peroxiredoxin-5, mitochondrial OS=Mus musculus OX=10090 GN=Prdx5 PE=1 SV=2
Q66JV4	R12BB_MOUSE	3.12	2	2	25.8142	24.9406	23.7286	24.0691	96450		RNA-binding protein 12B-B OS=Mus musculus OX=10090 GN=Rbm12b2 PE=2 SV=2
Q64516	GLPK_MOUSE	3.22	1	1	23.7077	24.1565	23.5165	24.1642	61227		Glycerol kinase OS=Mus musculus OX=10090 GN=Gk PE=1 SV=2
P80317	TCPZ_MOUSE	48.02	21	21	31.7771	31.6881	31.4775	31.7129	58004	NBF;Oxidation (M)	T-complex protein 1 subunit zeta OS=Mus musculus OX=10090 GN=Cct6a PE=1 SV=3
Q8BY46	ZN574_MOUSE	4.89	2	2	20.1522	21.1041	22.2093	22.1572	99461		Zinc finger protein 574 OS=Mus musculus OX=10090 GN=Znf574 PE=1 SV=1
Q78ZA7	NP1L4_MOUSE	44.27	11	10	29.7645	29.2535	29.4433	29.3346	42679	Acetylation (N-term);Oxidation (M)	Nucleosome assembly protein 1-like 4 OS=Mus musculus OX=10090 GN=Nap1l4 PE=1 SV=1
P28704	RXRB_MOUSE	10.19	4	4	24.7695	25.1527	24.5754	24.6375	55866		Retinoic acid receptor RXR-beta OS=Mus musculus OX=10090 GN=Rxrb PE=1 SV=2
Q80X85	RT07_MOUSE	30.17	5	5	26.0711	25.4862	25.9203	25.3511	28063		28S ribosomal protein S7, mitochondrial OS=Mus musculus OX=10090 GN=Mrps7 PE=1 SV=1
Q9D517	PLCC_MOUSE	5.05	1	1	22.144	22.6404	23.1853	22.1479	43296		1-acyl-sn-glycerol-3-phosphate acyltransferase gamma OS=Mus musculus OX=10090 GN=Agpat3 PE=1 SV=2
Q99K95	RTF2_MOUSE	6.84	2	2	23.0097	20.451	22.6471	21.5566	33935		Replication termination factor 2 OS=Mus musculus OX=10090 GN=Rtf2 PE=1 SV=1
Q9Z0H8	CLIP2_MOUSE	8.02	8	6	25.4738	25.4583	25.1135	25.0443	115910		CAP-Gly domain-containing linker protein 2 OS=Mus musculus OX=10090 GN=Clip2 PE=1 SV=2
P35951	LDLR_MOUSE	17.52	8	8	24.7695	24.4425	26.0547	25.2021	94947	Oxidation (M)	Low-density lipoprotein receptor OS=Mus musculus OX=10090 GN=Ldlr PE=1 SV=2
P47713	PA24A_MOUSE	29.41	15	15	29.0243	29.5664	28.8682	29.3766	85222	Oxidation (M)	Cytosolic phospholipase A2 OS=Mus musculus OX=10090 GN=Pla2g4a PE=1 SV=1
Q9WTQ8	TIM23_MOUSE	37.32	3	3	26.6458	26.6595	26.8264	26.632	21978	Oxidation (M)	Mitochondrial import inner membrane translocase subunit Tim23 OS=Mus musculus OX=10090 GN=Timm23 PE=1 SV=1
Q8C878	UBA3_MOUSE	23.81	6	6	28.4629	28.5203	27.726	28.4862	51737	Oxidation (M)	NEDD8-activating enzyme E1 catalytic subunit OS=Mus musculus OX=10090 GN=Uba3 PE=1 SV=2
Q9EQ61	PESC_MOUSE	25.34	13	13	29.6998	30.0609	29.0217	30.0217	67796	Oxidation (M)	Pescadillo homolog OS=Mus musculus OX=10090 GN=Pes1 PE=1 SV=1
Q924T2	RT02_MOUSE	21.31	4	4	26.9977	26.726	26.8385	26.8974	32313	Oxidation (M)	28S ribosomal protein S2, mitochondrial OS=Mus musculus OX=10090 GN=Mrps2 PE=1 SV=1
Q7TSH6	SCAF4_MOUSE	9.13	6	5	26.7895	26.8741	26.8385	26.9088	129056	Acetylation (N-term);Oxidation (M)	SR-related and CTD-associated factor 4 OS=Mus musculus OX=10090 GN=Scaf4 PE=1 SV=1
Q01721	GAS1_MOUSE	23.62	4	4	26.5754	26.4394	26.8019	26.4908	35694	Acetylation (N-term)	Growth arrest-specific protein 1 OS=Mus musculus OX=10090 GN=Gas1 PE=1 SV=2
Q5I012	S38AA_MOUSE	15.14	9	9	23.8576	27.9869	24.1332	23.1123	117194	Oxidation (M)	Putative sodium-coupled neutral amino acid transporter 10 OS=Mus musculus OX=10090 GN=Slc38a10 PE=1 SV=2
P14719	ILRL1_MOUSE	13.58	5	5	26.6998	26.965	26.8142	26.4583	64801	Oxidation (M)	Interleukin-1 receptor-like 1 OS=Mus musculus OX=10090 GN=Il1rl1 PE=1 SV=2
Q91XC0	AJUBA_MOUSE	9.14	3	3	23.8093	23.8858	23.7695	23.5165	57920		LIM domain-containing protein ajuba OS=Mus musculus OX=10090 GN=Ajuba PE=1 SV=1
P97346	NXN_MOUSE	38.62	13	13	27.5463	27.6181	27.7581	27.4629	48344	Acetylation (N-term);Oxidation (M)	Nucleoredoxin OS=Mus musculus OX=10090 GN=Nxn PE=1 SV=1
O88852	TSYL1_MOUSE	2.9	1	1	20.7765	20.9708	21.002	NaN	42994		Testis-specific Y-encoded-like protein 1 OS=Mus musculus OX=10090 GN=Tspyl1 PE=2 SV=1
Q3UFS4	GPT11_MOUSE	5.34	1	1	23.5165	23.1312	23.4551	22.8724	30608		G patch domain-containing protein 11 OS=Mus musculus OX=10090 GN=Gpatch11 PE=1 SV=2
C0HKE4	H2A1E_MOUSE	28.46	9	3	27.4551	29.6407	26.8264	28.9512	14135	NBF	Histone H2A type 1-E OS=Mus musculus OX=10090 GN=H2ac8 PE=1 SV=1
Q69ZF7	CNNM4_MOUSE	8.82	5	5	23.1751	23.417	23.8858	23.3511	86626	Oxidation (M)	Metal transporter CNNM4 OS=Mus musculus OX=10090 GN=Cnnm4 PE=1 SV=2
P51881	ADT2_MOUSE	30.87	20	12	32.717	32.4775	32.6777	32.099	32931	Acetylation (N-term);NBF;Oxidation (M)	ADP/ATP translocase 2 OS=Mus musculus OX=10090 GN=Slc25a5 PE=1 SV=3
Q6ZQF0	TOPB1_MOUSE	11.62	11	11	25.5725	25.8811	25.6649	25.8834	168860	Oxidation (M)	DNA topoisomerase 2-binding protein 1 OS=Mus musculus OX=10090 GN=Topbp1 PE=1 SV=2
P49718	MCM5_MOUSE	37.19	21	21	29.94	30.4334	29.9117	30.7453	82407	Acetylation (N-term);Oxidation (M)	DNA replication licensing factor MCM5 OS=Mus musculus OX=10090 GN=Mcm5 PE=1 SV=2
Q3KNY0	IGFN1_MOUSE	0.84	2	2	23.3778	25.1908	23.7182	24.632	303658	Acetylation (N-term);NBF	Immunoglobulin-like and fibronectin type III domain-containing protein 1 OS=Mus musculus OX=10090 GN=Igfn1 PE=1 SV=3
Q9WUM5	SUCA_MOUSE	25.72	6	6	27.1214	26.7129	27.8682	26.8264	36155	Oxidation (M)	Succinate--CoA ligase [ADP/GDP-forming] subunit alpha, mitochondrial OS=Mus musculus OX=10090 GN=Suclg1 PE=1 SV=4
Q61738	ITA7_MOUSE	2.46	2	2	22.8812	23.3511	22.3947	23.3645	129329		Integrin alpha-7 OS=Mus musculus OX=10090 GN=Itga7 PE=1 SV=3
Q91YN9	BAG2_MOUSE	20.95	4	4	27.7195	28.341	27.524	28.6629	23474	Oxidation (M)	BAG family molecular chaperone regulator 2 OS=Mus musculus OX=10090 GN=Bag2 PE=1 SV=1
Q8K310	MATR3_MOUSE	40.31	23	23	30.3724	30.6285	30.2647	30.5109	94630	Acetylation (N-term);Oxidation (M)	Matrin-3 OS=Mus musculus OX=10090 GN=Matr3 PE=1 SV=1
P26645	MARCS_MOUSE	61.49	11	11	27.5014	28.4234	26.6865	26.4583	29661	Acetylation (N-term)	Myristoylated alanine-rich C-kinase substrate OS=Mus musculus OX=10090 GN=Marcks PE=1 SV=2
Q8K3H0	DP13A_MOUSE	24.33	11	11	26.632	27.4073	26.4008	26.9539	79328	Oxidation (M)	DCC-interacting protein 13-alpha OS=Mus musculus OX=10090 GN=Appl1 PE=1 SV=1
Q99N92	RM27_MOUSE	27.03	3	3	24.7024	24.8336	24.5754	24.2535	15945	Oxidation (M)	39S ribosomal protein L27, mitochondrial OS=Mus musculus OX=10090 GN=Mrpl27 PE=1 SV=1
Q9WU56	TRUA_MOUSE	29.55	9	9	27.6798	26.7645	27.0296	28.2803	47502	Oxidation (M)	tRNA pseudouridine synthase A OS=Mus musculus OX=10090 GN=Pus1 PE=1 SV=2
Q3V0J1	TM237_MOUSE	4.22	1	1	22.1255	22.9863	21.8907	22.2731	47343		Transmembrane protein 237 OS=Mus musculus OX=10090 GN=Tmem237 PE=1 SV=1
Q9D735	TRIR_MOUSE	6.94	1	1	24.895	24.3031	24.5345	24.2243	18377		Telomerase RNA component interacting RNase OS=Mus musculus OX=10090 GN=Trir PE=1 SV=1
P63013	PRRX1_MOUSE	32.65	7	4	26.038	26.3239	25.9606	26.0127	27269	Acetylation (N-term);Oxidation (M)	Paired mesoderm homeobox protein 1 OS=Mus musculus OX=10090 GN=Prrx1 PE=1 SV=1
Q9EQH3	VPS35_MOUSE	36.93	23	23	29.8974	30.4823	29.5278	30.196	91713	Oxidation (M)	Vacuolar protein sorting-associated protein 35 OS=Mus musculus OX=10090 GN=Vps35 PE=1 SV=1
Q8C561	LMBD2_MOUSE	7.35	3	3	25.2643	22.5264	25.5783	23.1223	81101		G-protein coupled receptor-associated protein LMBRD2 OS=Mus musculus OX=10090 GN=Lmbrd2 PE=1 SV=1
P97784	CRY1_MOUSE	2.97	1	1	22.2337	21.4878	22.2259	21.7663	68001	Oxidation (M)	Cryptochrome-1 OS=Mus musculus OX=10090 GN=Cry1 PE=1 SV=1
P14069	S10A6_MOUSE	16.85	2	2	26.3342	28.1115	26.1795	26.5359	10051	NBF	Protein S100-A6 OS=Mus musculus OX=10090 GN=S100a6 PE=1 SV=3
Q9Z0R0	HASP_MOUSE	2.92	1	1	18.563	NaN	20.2427	19.3255	84181		Serine/threonine-protein kinase haspin OS=Mus musculus OX=10090 GN=Haspin PE=1 SV=3
Q6P0X2	ZN511_MOUSE	12.33	2	2	23.2058	24.4234	23.0681	24.1095	25761	Oxidation (M)	Zinc finger protein 511 OS=Mus musculus OX=10090 GN=Znf511 PE=1 SV=2
O70378	EMC8_MOUSE	27.54	4	4	28.2353	28.4234	27.7581	28.5754	23348	Oxidation (M)	ER membrane protein complex subunit 8 OS=Mus musculus OX=10090 GN=Emc8 PE=1 SV=1
P97770	THUM3_MOUSE	17.43	6	6	25.6595	26.4969	25.8647	26.2335	56431		THUMP domain-containing protein 3 OS=Mus musculus OX=10090 GN=Thumpd3 PE=1 SV=1
Q921F4	HNRLL_MOUSE	32.99	13	13	28.6075	28.3745	28.3153	28.17	64125	Oxidation (M)	Heterogeneous nuclear ribonucleoprotein L-like OS=Mus musculus OX=10090 GN=Hnrnpll PE=1 SV=3
Q3TPX4	EXOC5_MOUSE	5.93	2	2	21.6896	20.6757	23.2101	21.5528	81738		Exocyst complex component 5 OS=Mus musculus OX=10090 GN=Exoc5 PE=1 SV=2
Q8R2U0	SEH1_MOUSE	22.22	5	5	27.2262	27.2979	27.2077	27.3494	39775	Oxidation (M)	Nucleoporin SEH1 OS=Mus musculus OX=10090 GN=Seh1l PE=2 SV=1
Q924Z5	TRAM2_MOUSE	5.68	2	2	25.5105	25.4202	24.6209	25.6513	43183		Translocating chain-associated membrane protein 2 OS=Mus musculus OX=10090 GN=Tram2 PE=1 SV=1
Q8K2Q7	BROX_MOUSE	25.79	6	6	26.2353	25.7208	26.0443	25.726	46202	Oxidation (M)	BRO1 domain-containing protein BROX OS=Mus musculus OX=10090 GN=Brox PE=1 SV=1
P46735	MYO1B_MOUSE	6.78	5	4	25.5433	25.4041	25.2021	25.7796	128564	Oxidation (M)	Unconventional myosin-Ib OS=Mus musculus OX=10090 GN=Myo1b PE=1 SV=3
B2RY56	RBM25_MOUSE	16.83	13	13	28.1361	28.1937	27.7325	28.7195	99552	Oxidation (M)	RNA-binding protein 25 OS=Mus musculus OX=10090 GN=Rbm25 PE=1 SV=2
Q8CIN4	PAK2_MOUSE	38.74	16	11	29.57	29.9814	29.2216	29.604	57930	Acetylation (N-term);Oxidation (M)	Serine/threonine-protein kinase PAK 2 OS=Mus musculus OX=10090 GN=Pak2 PE=1 SV=1
Q80ZQ9	ABITM_MOUSE	19.69	2	2	24.6757	24.7492	24.824	24.7182	21597		Protein Abitram OS=Mus musculus OX=10090 GN=Abitram PE=1 SV=2
Q9D8X2	CC124_MOUSE	21.66	4	4	27.9428	28.6285	28.1507	28.2803	25346		Coiled-coil domain-containing protein 124 OS=Mus musculus OX=10090 GN=Ccdc124 PE=1 SV=1
Q91WD1	RPC4_MOUSE	6.03	2	2	21.8732	22.2725	20.4718	21.218	44357	Oxidation (M)	DNA-directed RNA polymerase III subunit RPC4 OS=Mus musculus OX=10090 GN=Polr3d PE=2 SV=2
Q80VJ3	DNPH1_MOUSE	38.73	4	4	27.6931	28.019	27.2262	27.7645	18977	Oxidation (M)	2'-deoxynucleoside 5'-phosphate N-hydrolase 1 OS=Mus musculus OX=10090 GN=Dnph1 PE=1 SV=2
Q80U95	UBE3C_MOUSE	24.01	16	16	26.9428	27.0813	26.9428	27.4073	123976	Acetylation (N-term);Oxidation (M)	Ubiquitin-protein ligase E3C OS=Mus musculus OX=10090 GN=Ube3c PE=1 SV=2
Q61753	SERA_MOUSE	28.14	14	14	32.5014	33.0927	31.8755	32.8366	56586	NBF;Oxidation (M)	D-3-phosphoglycerate dehydrogenase OS=Mus musculus OX=10090 GN=Phgdh PE=1 SV=3
Q3U7R1	ESYT1_MOUSE	47.25	38	38	29.203	30.0479	29.0557	29.7325	121554	Acetylation (N-term);NBF;Oxidation (M)	Extended synaptotagmin-1 OS=Mus musculus OX=10090 GN=Esyt1 PE=1 SV=2
P08030	APT_MOUSE	46.67	5	5	30.6964	31.3879	30.5664	31.7494	19724	Oxidation (M)	Adenine phosphoribosyltransferase OS=Mus musculus OX=10090 GN=Aprt PE=1 SV=2
Q9JJE7	FADS3_MOUSE	20.71	5	5	27.4314	27.8504	27.4938	27.7389	51469	Acetylation (N-term);Oxidation (M)	Fatty acid desaturase 3 OS=Mus musculus OX=10090 GN=Fads3 PE=1 SV=2
Q9QZQ1	AFAD_MOUSE	25.33	31	31	27.0914	27.341	26.8741	27.3578	206499	Oxidation (M)	Afadin OS=Mus musculus OX=10090 GN=Afdn PE=1 SV=3
P97377	CDK2_MOUSE	45.09	13	12	28.8887	29.0217	28.3109	29.1866	38978	Oxidation (M)	Cyclin-dependent kinase 2 OS=Mus musculus OX=10090 GN=Cdk2 PE=1 SV=2
Q91YN0	CL004_MOUSE	2.36	1	1	20.8294	20.9567	20.072	21.0983	63644		Protein C12orf4 homolog OS=Mus musculus OX=10090 GN=D6Wsu163e PE=1 SV=1
Q7TMC8	FCSK_MOUSE	3.67	2	2	21.8605	18.9237	21.1763	20.7837	119267		L-fucose kinase OS=Mus musculus OX=10090 GN=Fcsk PE=1 SV=1
P43135	COT2_MOUSE	7.73	2	2	NaN	24.5404	22.3399	24.8093	45571		COUP transcription factor 2 OS=Mus musculus OX=10090 GN=Nr2f2 PE=1 SV=2
Q6PGC1	DHX29_MOUSE	24.62	19	19	25.6513	26.4877	26.0317	26.7771	153975	Acetylation (N-term);NBF;Oxidation (M)	ATP-dependent RNA helicase DHX29 OS=Mus musculus OX=10090 GN=Dhx29 PE=1 SV=1
Q9CXK9	RBM33_MOUSE	9.83	8	8	27.2353	27.8324	26.604	27.965	137325	Acetylation (N-term);Oxidation (M)	RNA-binding protein 33 OS=Mus musculus OX=10090 GN=Rbm33 PE=1 SV=2
Q9CYU6	DPH7_MOUSE	6.08	2	2	21.9469	22.1672	20.0436	21.6181	53201	Oxidation (M)	Diphthine methyltransferase OS=Mus musculus OX=10090 GN=Dph7 PE=2 SV=1
P46638	RB11B_MOUSE	25.69	14	3	28.9567	29.0609	28.7325	28.9705	24489		Ras-related protein Rab-11B OS=Mus musculus OX=10090 GN=Rab11b PE=1 SV=3
Q9DCM0	ETHE1_MOUSE	17.72	3	3	26.5315	27.1604	26.2207	27.1214	27739		Persulfide dioxygenase ETHE1, mitochondrial OS=Mus musculus OX=10090 GN=Ethe1 PE=1 SV=2
Q9D8Z1	ASCC1_MOUSE	10.39	3	3	24.48	25.065	24.6264	24.3511	41280	Acetylation (N-term);Oxidation (M)	Activating signal cointegrator 1 complex subunit 1 OS=Mus musculus OX=10090 GN=Ascc1 PE=1 SV=1
Q9Z2N8	ACL6A_MOUSE	33.1	9	9	30.3088	30.2193	30.5481	30.1361	47448	Oxidation (M)	Actin-like protein 6A OS=Mus musculus OX=10090 GN=Actl6a PE=1 SV=2
Q62193	RFA2_MOUSE	17.78	4	4	27.341	27.5463	26.976	27.7389	29718	Oxidation (M)	Replication protein A 32 kDa subunit OS=Mus musculus OX=10090 GN=Rpa2 PE=1 SV=1
Q8BVF7	APH1A_MOUSE	5.28	2	2	21.7111	20.6941	19.8155	20.2256	28986		Gamma-secretase subunit APH-1A OS=Mus musculus OX=10090 GN=Aph1a PE=1 SV=2
Q64012	RALY_MOUSE	44.23	12	12	29.7178	30.362	29.2007	30.1115	33188	NBF;Oxidation (M)	RNA-binding protein Raly OS=Mus musculus OX=10090 GN=Raly PE=1 SV=3
Q9D8V0	HM13_MOUSE	23.02	9	9	27.3066	28.0914	28.019	27.7771	41748	Oxidation (M)	Minor histocompatibility antigen H13 OS=Mus musculus OX=10090 GN=Hm13 PE=1 SV=1
Q99J45	NRBP_MOUSE	30.28	10	10	27.5014	27.5898	27.4154	27.5754	59866	Acetylation (N-term);Oxidation (M)	Nuclear receptor-binding protein OS=Mus musculus OX=10090 GN=Nrbp1 PE=1 SV=1
P31230	AIMP1_MOUSE	40	10	10	29.8504	30.0737	29.5933	30.099	33997	Oxidation (M)	Aminoacyl tRNA synthase complex-interacting multifunctional protein 1 OS=Mus musculus OX=10090 GN=Aimp1 PE=1 SV=2
Q8C078	KKCC2_MOUSE	16.84	5	5	24.0772	24.5696	24.7024	23.3511	64618		Calcium/calmodulin-dependent protein kinase kinase 2 OS=Mus musculus OX=10090 GN=Camkk2 PE=1 SV=2
Q9Z0F8	ADA17_MOUSE	1.93	1	1	23.7182	22.0013	22.4087	24.1565	93056		Disintegrin and metalloproteinase domain-containing protein 17 OS=Mus musculus OX=10090 GN=Adam17 PE=1 SV=3
Q8R344	CCD12_MOUSE	20.48	2	2	26.673	26.4785	26.1332	26.5667	18891		Coiled-coil domain-containing protein 12 OS=Mus musculus OX=10090 GN=Ccdc12 PE=1 SV=2
Q8BYW9	EOGT_MOUSE	6.07	3	3	25.0772	25.019	24.3031	25.7568	61446		EGF domain-specific O-linked N-acetylglucosamine transferase OS=Mus musculus OX=10090 GN=Eogt PE=1 SV=1
Q923D4	SF3B5_MOUSE	17.44	1	1	24.2096	24.5345	23.6865	23.3376	10119	Oxidation (M)	Splicing factor 3B subunit 5 OS=Mus musculus OX=10090 GN=Sf3b5 PE=1 SV=1
Q9Z2L6	MINP1_MOUSE	8.73	3	3	23.6096	25.9248	25.6096	26.1946	54537		Multiple inositol polyphosphate phosphatase 1 OS=Mus musculus OX=10090 GN=Minpp1 PE=1 SV=3
Q8BY79	S35G1_MOUSE	12.23	2	2	21.4154	22.165	21.9929	23.0061	40217	Acetylation (N-term);Oxidation (M)	Solute carrier family 35 member G1 OS=Mus musculus OX=10090 GN=Slc35g1 PE=2 SV=1
Q4PJX1	ODR4_MOUSE	6.71	2	2	24.4298	24.6486	24.8623	25.0732	49998		Protein odr-4 homolog OS=Mus musculus OX=10090 GN=Odr4 PE=1 SV=2
Q9CXU1	MED31_MOUSE	23.66	2	2	22.7581	23.848	22.2301	23.2305	15771	Acetylation (N-term);Oxidation (M)	Mediator of RNA polymerase II transcription subunit 31 OS=Mus musculus OX=10090 GN=Med31 PE=1 SV=2
Q8C166	CPNE1_MOUSE	19.22	8	7	28.9732	29.5664	29.1771	30.1483	58887	Oxidation (M)	Copine-1 OS=Mus musculus OX=10090 GN=Cpne1 PE=1 SV=1
O35071	KIF1C_MOUSE	7.36	7	5	24.002	25.2096	24.1795	24.895	122434	Oxidation (M)	Kinesin-like protein KIF1C OS=Mus musculus OX=10090 GN=Kif1c PE=1 SV=2
Q922H1	ANM3_MOUSE	15.41	6	6	26.8741	26.3083	26.1946	26.1174	59902	Acetylation (N-term);Oxidation (M)	Protein arginine N-methyltransferase 3 OS=Mus musculus OX=10090 GN=Prmt3 PE=1 SV=2
Q9D1M0	SEC13_MOUSE	8.7	2	2	27.3066	28.0813	26.5536	27.5969	35566		Protein SEC13 homolog OS=Mus musculus OX=10090 GN=Sec13 PE=1 SV=3
Q8BXK8	AGAP1_MOUSE	5.25	4	3	23.0348	23.6649	23.0284	23.8576	94411		Arf-GAP with GTPase, ANK repeat and PH domain-containing protein 1 OS=Mus musculus OX=10090 GN=Agap1 PE=1 SV=1
P59328	WDHD1_MOUSE	12.98	7	7	26.3066	29.0057	26.217	26.1234	124254	Oxidation (M)	WD repeat and HMG-box DNA-binding protein 1 OS=Mus musculus OX=10090 GN=Wdhd1 PE=1 SV=2
Q9DBT5	AMPD2_MOUSE	11.65	7	7	27.9203	28.0914	27.8081	28.17	92024	Oxidation (M)	AMP deaminase 2 OS=Mus musculus OX=10090 GN=Ampd2 PE=1 SV=1
Q6PAV2	HERC4_MOUSE	15.61	10	10	26.3528	26.7389	26.0275	26.5536	118412	Oxidation (M)	Probable E3 ubiquitin-protein ligase HERC4 OS=Mus musculus OX=10090 GN=Herc4 PE=1 SV=2
P62838	UB2D2_MOUSE	7.48	1	1	27.0084	25.6153	28.1747	26.0914	16735		Ubiquitin-conjugating enzyme E2 D2 OS=Mus musculus OX=10090 GN=Ube2d2 PE=1 SV=1
P62484	ABI2_MOUSE	4.48	3	1	21.5024	22.3091	23.4041	22.4913	49387		Abl interactor 2 OS=Mus musculus OX=10090 GN=Abi2 PE=1 SV=1
P28301	LYOX_MOUSE	35.04	8	8	29.196	29.4976	29.0401	29.3704	46701	Oxidation (M)	Protein-lysine 6-oxidase OS=Mus musculus OX=10090 GN=Lox PE=1 SV=1
Q9CQ28	DPH6_MOUSE	6.37	1	1	NaN	19.8437	20.2892	20.1539	29922		Diphthine--ammonia ligase OS=Mus musculus OX=10090 GN=Dph6 PE=1 SV=1
P58281	OPA1_MOUSE	25.21	18	18	25.9825	26.4122	25.824	26.632	111339	Oxidation (M)	Dynamin-like 120 kDa protein, mitochondrial OS=Mus musculus OX=10090 GN=Opa1 PE=1 SV=1
A2A8U2	TM201_MOUSE	9.79	3	3	23.3239	23.8576	22.7227	23.9043	72500		Transmembrane protein 201 OS=Mus musculus OX=10090 GN=Tmem201 PE=1 SV=1
Q6ZWY9	H2B1C_MOUSE	22.22	18	2	21.9996	22.8166	21.4238	25.0359	13906	Oxidation (M)	Histone H2B type 1-C/E/G OS=Mus musculus OX=10090 GN=H2bc4 PE=1 SV=3
Q9DB16	CB39L_MOUSE	9.2	5	2	20.8184	19.9762	21.4449	19.6889	39106		Calcium-binding protein 39-like OS=Mus musculus OX=10090 GN=Cab39l PE=1 SV=3
Q9EPQ8	TCF20_MOUSE	11.58	12	12	24.9847	24.1253	25.0975	24.6918	215683	NBF;Oxidation (M)	Transcription factor 20 OS=Mus musculus OX=10090 GN=Tcf20 PE=1 SV=3
Q9JM05	PIAS4_MOUSE	8.28	3	3	25.8788	25.9847	24.632	23.1149	55570	Oxidation (M)	E3 SUMO-protein ligase PIAS4 OS=Mus musculus OX=10090 GN=Pias4 PE=1 SV=2
Q9D1I2	CAR19_MOUSE	13.11	2	2	26.3877	25.8336	27.3745	25.1833	20936		Caspase recruitment domain-containing protein 19 OS=Mus musculus OX=10090 GN=Card19 PE=1 SV=1
P97471	SMAD4_MOUSE	13.43	3	3	26.48	26.2133	26.632	26.9203	60342	Oxidation (M)	Mothers against decapentaplegic homolog 4 OS=Mus musculus OX=10090 GN=Smad4 PE=1 SV=2
Q61510	TRI25_MOUSE	5.99	3	3	24.5285	25.2535	24.2891	25.2926	71726		E3 ubiquitin/ISG15 ligase TRIM25 OS=Mus musculus OX=10090 GN=Trim25 PE=1 SV=2
Q5SWW4	MED13_MOUSE	2.53	3	3	21.5869	20.4155	23.3645	22.4901	238591	Acetylation (N-term)	Mediator of RNA polymerase II transcription subunit 13 OS=Mus musculus OX=10090 GN=Med13 PE=1 SV=1
P97863	NFIB_MOUSE	26.49	9	8	30.6285	30.4727	29.611	30.7129	63507	Oxidation (M)	Nuclear factor 1 B-type OS=Mus musculus OX=10090 GN=Nfib PE=1 SV=2
Q9CRA8	EXOS5_MOUSE	7.23	2	2	24.5225	26.8974	25.3877	26.8974	25194		Exosome complex component RRP46 OS=Mus musculus OX=10090 GN=Exosc5 PE=1 SV=1
Q9CXJ4	MITOS_MOUSE	1.81	1	1	21.4444	23.976	19.9172	21.6008	78000		Mitochondrial potassium channel ATP-binding subunit OS=Mus musculus OX=10090 GN=Abcb8 PE=1 SV=1
Q99JY0	ECHB_MOUSE	39.16	14	14	30.0737	29.9539	28.4629	29.5071	51386	Oxidation (M)	Trifunctional enzyme subunit beta, mitochondrial OS=Mus musculus OX=10090 GN=Hadhb PE=1 SV=1
O35226	PSMD4_MOUSE	20.21	5	5	30.3303	30.0349	29.7708	29.6527	40704	Oxidation (M)	26S proteasome non-ATPase regulatory subunit 4 OS=Mus musculus OX=10090 GN=Psmd4 PE=1 SV=1
Q91VD9	NDUS1_MOUSE	35.49	18	18	28.5052	28.9814	28.3367	28.8534	79777	Oxidation (M)	NADH-ubiquinone oxidoreductase 75 kDa subunit, mitochondrial OS=Mus musculus OX=10090 GN=Ndufs1 PE=1 SV=2
Q09XV5	CHD8_MOUSE	6.86	11	10	26.8974	25.5754	25.4008	26.8264	290847	Oxidation (M)	Chromodomain-helicase-DNA-binding protein 8 OS=Mus musculus OX=10090 GN=Chd8 PE=1 SV=1
Q9DCH6	ZFAN6_MOUSE	9.87	2	2	22.3303	23.4041	21.2967	22.2621	24001		AN1-type zinc finger protein 6 OS=Mus musculus OX=10090 GN=Zfand6 PE=1 SV=1
E9Q1P8	I2BP2_MOUSE	37.54	14	14	28.509	28.4862	27.6458	28.2262	59292	Acetylation (N-term);NBF	Interferon regulatory factor 2-binding protein 2 OS=Mus musculus OX=10090 GN=Irf2bp2 PE=1 SV=1
Q6PGF7	EXOC8_MOUSE	20.67	8	8	26.3494	26.2114	26.0813	25.9406	81035	Oxidation (M)	Exocyst complex component 8 OS=Mus musculus OX=10090 GN=Exoc8 PE=1 SV=1
Q8CCP0	NEMF_MOUSE	12.22	9	9	27.7771	27.6527	26.4999	26.4908	121188	Oxidation (M)	Nuclear export mediator factor Nemf OS=Mus musculus OX=10090 GN=Nemf PE=1 SV=2
Q8VD62	CK068_MOUSE	36.91	8	8	26.5898	27.2077	25.7745	27.3494	31846	Acetylation (N-term);Oxidation (M)	UPF0696 protein C11orf68 homolog OS=Mus musculus OX=10090 GN=Bles03 PE=1 SV=2
Q924T3	XRCC4_MOUSE	18.4	4	4	25.217	24.5463	24.4298	25.5492	37061	Oxidation (M)	DNA repair protein XRCC4 OS=Mus musculus OX=10090 GN=Xrcc4 PE=1 SV=1
Q3UQ84	SYTM_MOUSE	5.81	4	4	23.5522	24.9406	23.2679	24.3844	81700		Threonine--tRNA ligase, mitochondrial OS=Mus musculus OX=10090 GN=Tars2 PE=1 SV=1
Q68FE2	ATG9A_MOUSE	2.18	1	1	22.3919	22.9246	21.7688	23.1105	63138		Autophagy-related protein 9A OS=Mus musculus OX=10090 GN=Atg9a PE=1 SV=1
Q9Z1M4	KS6B2_MOUSE	2.68	1	1	24.6757	26.3273	24.5404	25.1135	53538		Ribosomal protein S6 kinase beta-2 OS=Mus musculus OX=10090 GN=Rps6kb2 PE=1 SV=1
Q8CGC4	LS14B_MOUSE	44.42	9	9	25.8409	26.3762	26.5898	26.1155	42310	Oxidation (M)	Protein LSM14 homolog B OS=Mus musculus OX=10090 GN=Lsm14b PE=1 SV=3
Q8VI36	PAXI_MOUSE	21.15	6	6	26.4661	26.1527	26.6458	26.0062	64476	Acetylation (N-term);Oxidation (M)	Paxillin OS=Mus musculus OX=10090 GN=Pxn PE=1 SV=1
O88487	DC1I2_MOUSE	37.58	14	14	29.8519	29.5165	29.0634	29.4473	68394	Acetylation (N-term);Oxidation (M)	Cytoplasmic dynein 1 intermediate chain 2 OS=Mus musculus OX=10090 GN=Dync1i2 PE=1 SV=1
P97808	FXYD5_MOUSE	25.28	2	2	20.3378	21.9945	22.9686	19.3625	19454	Oxidation (M)	FXYD domain-containing ion transport regulator 5 OS=Mus musculus OX=10090 GN=Fxyd5 PE=1 SV=3
Q80TV8	CLAP1_MOUSE	26.25	30	28	27.0914	27.4073	26.9203	27.2714	169227	Acetylation (N-term);Oxidation (M)	CLIP-associating protein 1 OS=Mus musculus OX=10090 GN=Clasp1 PE=1 SV=2
O35239	PTN9_MOUSE	20.74	10	10	25.4041	27.0505	26.0894	26.9977	67970	Acetylation (N-term);Oxidation (M)	Tyrosine-protein phosphatase non-receptor type 9 OS=Mus musculus OX=10090 GN=Ptpn9 PE=1 SV=2
A2AAY5	SPD2B_MOUSE	24.01	14	13	27.6865	26.9428	27.1507	27.9372	101517	Oxidation (M)	SH3 and PX domain-containing protein 2B OS=Mus musculus OX=10090 GN=Sh3pxd2b PE=1 SV=1
Q80YQ2	MED23_MOUSE	15.95	16	16	25.3511	25.9316	25.4645	27.4234	156087	Acetylation (N-term);Oxidation (M)	Mediator of RNA polymerase II transcription subunit 23 OS=Mus musculus OX=10090 GN=Med23 PE=1 SV=2
Q9CRA4	MSMO1_MOUSE	8.53	2	2	25.1174	24.7024	25.2463	21.6582	34772		Methylsterol monooxygenase 1 OS=Mus musculus OX=10090 GN=Msmo1 PE=1 SV=1
A2A4P0	DHX8_MOUSE	16.32	12	12	26.1642	25.8019	26.8264	26.3444	142572	Acetylation (N-term);Oxidation (M)	ATP-dependent RNA helicase DHX8 OS=Mus musculus OX=10090 GN=Dhx8 PE=2 SV=1
Q8VBW6	ULA1_MOUSE	32.02	11	11	27.9923	27.5826	27.726	27.673	60274	Oxidation (M)	NEDD8-activating enzyme E1 regulatory subunit OS=Mus musculus OX=10090 GN=Nae1 PE=1 SV=1
Q9JK38	GNA1_MOUSE	9.78	1	1	23.7594	23.8385	24.3844	23.0295	20791	Oxidation (M)	Glucosamine 6-phosphate N-acetyltransferase OS=Mus musculus OX=10090 GN=Gnpnat1 PE=1 SV=1
Q8BW72	KDM4A_MOUSE	4.32	2	2	24.3844	22.4663	23.5404	23.976	120334	Oxidation (M)	Lysine-specific demethylase 4A OS=Mus musculus OX=10090 GN=Kdm4a PE=1 SV=3
Q8C2B3	HDAC7_MOUSE	17.48	8	8	25.902	24.4041	24.6375	25.1681	101287	Oxidation (M)	Histone deacetylase 7 OS=Mus musculus OX=10090 GN=Hdac7 PE=1 SV=2
Q8K4Q8	COL12_MOUSE	16.04	10	10	25.6865	25.5667	25.6403	25.8019	81304	Acetylation (N-term);Oxidation (M)	Collectin-12 OS=Mus musculus OX=10090 GN=Colec12 PE=1 SV=1
Q9R1Z8	VINEX_MOUSE	16.1	7	7	26.7129	27.7645	27.1015	27.7325	82349	Oxidation (M)	Vinexin OS=Mus musculus OX=10090 GN=Sorbs3 PE=1 SV=1
Q99J83	ATG5_MOUSE	7.64	2	2	23.3376	24.3712	23.8764	23.7796	32402		Autophagy protein 5 OS=Mus musculus OX=10090 GN=Atg5 PE=1 SV=1
Q62273	S26A2_MOUSE	2.57	1	1	21.2258	21.3843	21.699	20.9065	81604		Sulfate transporter OS=Mus musculus OX=10090 GN=Slc26a2 PE=1 SV=1
O55135	IF6_MOUSE	31.43	5	5	30.5389	30.7211	30.362	30.8385	26511	Oxidation (M)	Eukaryotic translation initiation factor 6 OS=Mus musculus OX=10090 GN=Eif6 PE=1 SV=2
Q9JI39	ABCBA_MOUSE	19.86	10	10	26.1194	27.0296	25.9361	26.4692	77188	Oxidation (M)	ATP-binding cassette sub-family B member 10, mitochondrial OS=Mus musculus OX=10090 GN=Abcb10 PE=1 SV=1
Q99KG3	RBM10_MOUSE	18.6	10	10	28.4394	28.9814	28.0453	28.6216	103494	Oxidation (M)	RNA-binding protein 10 OS=Mus musculus OX=10090 GN=Rbm10 PE=1 SV=1
P52875	TM165_MOUSE	19.2	4	4	27.8682	28.5203	27.6595	28.2847	34791	Oxidation (M)	Transmembrane protein 165 OS=Mus musculus OX=10090 GN=Tmem165 PE=1 SV=2
Q9DC70	NDUS7_MOUSE	26.79	5	5	25.1293	24.1719	25.7208	24.2096	24683	Oxidation (M)	NADH dehydrogenase [ubiquinone] iron-sulfur protein 7, mitochondrial OS=Mus musculus OX=10090 GN=Ndufs7 PE=1 SV=1
P97765	WBP2_MOUSE	14.18	3	3	25.341	26.5754	25.9248	25.5696	28032		WW domain-binding protein 2 OS=Mus musculus OX=10090 GN=Wbp2 PE=1 SV=1
P53690	MMP14_MOUSE	15.98	7	7	27.2535	27.4785	26.9088	27.5536	65919	Oxidation (M)	Matrix metalloproteinase-14 OS=Mus musculus OX=10090 GN=Mmp14 PE=2 SV=3
Q9D0R2	SYTC_MOUSE	23.68	19	17	29.9539	30.6022	29.7162	30.5296	83356	Oxidation (M)	Threonine--tRNA ligase 1, cytoplasmic OS=Mus musculus OX=10090 GN=Tars1 PE=1 SV=2
Q9Z2A0	PDPK1_MOUSE	11.99	4	4	25.4234	26.0833	25.8215	25.8215	63759		3-phosphoinositide-dependent protein kinase 1 OS=Mus musculus OX=10090 GN=Pdpk1 PE=1 SV=2
P03921	NU5M_MOUSE	11.7	4	4	25.4984	25.9406	25.2679	26.1814	68475	Oxidation (M)	NADH-ubiquinone oxidoreductase chain 5 OS=Mus musculus OX=10090 GN=Mtnd5 PE=1 SV=3
Q91YD3	DCP1A_MOUSE	34.05	10	10	24.9495	24.4862	25.3612	24.6209	65219	Oxidation (M)	mRNA-decapping enzyme 1A OS=Mus musculus OX=10090 GN=Dcp1a PE=1 SV=1
Q6Y7W8	GGYF2_MOUSE	15.88	13	13	27.8019	27.6865	27.3494	27.3992	149193	Acetylation (N-term);Oxidation (M)	GRB10-interacting GYF protein 2 OS=Mus musculus OX=10090 GN=Gigyf2 PE=1 SV=2
Q8CB44	GRAM4_MOUSE	6.48	2	2	24.4234	24.4488	24.3239	23.6431	72264		GRAM domain-containing protein 4 OS=Mus musculus OX=10090 GN=Gramd4 PE=1 SV=1
Q91VX2	UBAP2_MOUSE	19.96	12	12	28.5754	28.3452	28.5128	28.1263	117966	Oxidation (M)	Ubiquitin-associated protein 2 OS=Mus musculus OX=10090 GN=Ubap2 PE=1 SV=1
P62317	SMD2_MOUSE	38.98	6	6	29.7486	30.7453	29.9677	30.6798	13527	Oxidation (M)	Small nuclear ribonucleoprotein Sm D2 OS=Mus musculus OX=10090 GN=Snrpd2 PE=1 SV=1
Q7TNE3	SPAG7_MOUSE	36.56	6	6	28.4354	28.5754	28.2891	28.6561	25921	Acetylation (N-term);Oxidation (M)	Sperm-associated antigen 7 OS=Mus musculus OX=10090 GN=Spag7 PE=1 SV=1
Q64311	NTAN1_MOUSE	14.52	3	3	25.2571	25.5638	25.6264	25.4707	34595	Oxidation (M)	Protein N-terminal asparagine amidohydrolase OS=Mus musculus OX=10090 GN=Ntan1 PE=1 SV=3
P61622	ITA11_MOUSE	3.62	3	3	21.2015	22.849	22.52	23.1213	133012	Oxidation (M)	Integrin alpha-11 OS=Mus musculus OX=10090 GN=Itga11 PE=1 SV=1
P52479	UBP10_MOUSE	24.62	11	11	27.9203	28.0609	27.6798	27.9539	87022	Acetylation (N-term);Oxidation (M)	Ubiquitin carboxyl-terminal hydrolase 10 OS=Mus musculus OX=10090 GN=Usp10 PE=1 SV=3
P62342	SELT_MOUSE	6.67	1	1	21.4772	23.7389	22.3153	23.0607	22261		Thioredoxin reductase-like selenoprotein T OS=Mus musculus OX=10090 GN=Selenot PE=1 SV=2
Q5EG47	AAPK1_MOUSE	15.56	6	6	26.9977	27.4938	26.9428	27.4551	63929	Oxidation (M)	5'-AMP-activated protein kinase catalytic subunit alpha-1 OS=Mus musculus OX=10090 GN=Prkaa1 PE=1 SV=2
Q69ZN7	MYOF_MOUSE	39.79	70	69	30.1115	30.6198	29.9259	30.6285	233324	Acetylation (N-term);Oxidation (M)	Myoferlin OS=Mus musculus OX=10090 GN=Myof PE=1 SV=2
Q9D0D4	DIM1_MOUSE	35.14	8	8	26.9977	27.5014	26.6865	27.5682	35274	Oxidation (M)	Probable dimethyladenosine transferase OS=Mus musculus OX=10090 GN=Dimt1 PE=2 SV=1
Q02395	MTF2_MOUSE	1.85	1	1	20.3816	21.3662	19.4648	20.5325	66924		Metal-response element-binding transcription factor 2 OS=Mus musculus OX=10090 GN=Mtf2 PE=1 SV=2
Q6NZF1	ZC11A_MOUSE	24.87	10	10	26.3745	26.2058	26.0041	25.792	86492	Oxidation (M)	Zinc finger CCCH domain-containing protein 11A OS=Mus musculus OX=10090 GN=Zc3h11a PE=1 SV=1
P15307	REL_MOUSE	9.54	4	4	24.6918	25.3679	24.5105	25.0975	64960	Acetylation (N-term);Oxidation (M)	Proto-oncogene c-Rel OS=Mus musculus OX=10090 GN=Rel PE=1 SV=2
P11440	CDK1_MOUSE	70.71	19	18	31.3088	31.5014	30.8682	31.3776	34107	Acetylation (N-term);NBF;Oxidation (M)	Cyclin-dependent kinase 1 OS=Mus musculus OX=10090 GN=Cdk1 PE=1 SV=3
Q9DB15	RM12_MOUSE	41.79	6	6	29.7927	29.3848	29.2216	29.5184	21708	Oxidation (M)	39S ribosomal protein L12, mitochondrial OS=Mus musculus OX=10090 GN=Mrpl12 PE=1 SV=2
[truncated: 3,928 more rows]

## Sheet: Persulfidated proteins
Accession	Entry name	Coverage (%)	#Peptides	#Unique	Replicate_1 Log2(intensity)	Replicate_2 Log2(intensity)	Replicate_3 Log2(intensity)	Replicate_4 Log2(intensity)	Avg. Mass	PTM	Description
Q3U9G9	LBR_MOUSE	14.38	8	8	24.7286	23.6209	24.239	24.4041	71440	Acetylation (N-term)	Delta(14)-sterol reductase LBR OS=Mus musculus OX=10090 GN=Lbr PE=1 SV=2
Q8CGA0	PPM1F_MOUSE	9.96	3	3	21.1544	19.6558	20.6805	19.346	49611		Protein phosphatase 1F OS=Mus musculus OX=10090 GN=Ppm1f PE=1 SV=1
Q924Z6	XPO6_MOUSE	0.98	1	1	18.6976	NaN	17.4618	16.8132	128664		Exportin-6 OS=Mus musculus OX=10090 GN=Xpo6 PE=1 SV=2
Q6A065	CE170_MOUSE	1.95	2	2	23.8093	22.2638	22.9107	22.4432	175050		Centrosomal protein of 170 kDa OS=Mus musculus OX=10090 GN=Cep170 PE=1 SV=2
P58404	STRN4_MOUSE	5.79	2	2	19.7408	19.6654	18.7089	16.8506	81645		Striatin-4 OS=Mus musculus OX=10090 GN=Strn4 PE=1 SV=2
Q9DCS9	NDUBA_MOUSE	31.82	4	4	24.9628	23.1193	24.5754	23.2021	21024	Oxidation (M)	NADH dehydrogenase [ubiquinone] 1 beta subcomplex subunit 10 OS=Mus musculus OX=10090 GN=Ndufb10 PE=1 SV=3
Q9R1P1	PSB3_MOUSE	34.15	5	5	25.6068	24.019	25.976	24.8717	22965	Oxidation (M)	Proteasome subunit beta type-3 OS=Mus musculus OX=10090 GN=Psmb3 PE=1 SV=1
P59326	YTHD1_MOUSE	2.68	2	1	19.6867	18.4364	19.1238	18.3865	60879		YTH domain-containing family protein 1 OS=Mus musculus OX=10090 GN=Ythdf1 PE=1 SV=1
Q9ESJ0	XPO4_MOUSE	4.78	4	4	22.4096	20.1384	21.7379	20.4452	129979		Exportin-4 OS=Mus musculus OX=10090 GN=Xpo4 PE=1 SV=2
O88878	ZFAN5_MOUSE	12.21	1	1	20.7294	18.2335	19.9941	18.5363	23058		AN1-type zinc finger protein 5 OS=Mus musculus OX=10090 GN=Zfand5 PE=1 SV=1
Q9CWI3	BCCIP_MOUSE	3.8	1	1	19.8595	17.778	19.2297	18.1574	35942		BRCA2 and CDKN1A-interacting protein OS=Mus musculus OX=10090 GN=Bccip PE=1 SV=1
Q9D2R0	AACS_MOUSE	6.4	4	4	23.417	22.5119	23.0818	22.6651	75200		Acetoacetyl-CoA synthetase OS=Mus musculus OX=10090 GN=Aacs PE=1 SV=1
Q8C6G8	WDR26_MOUSE	2.03	1	1	20.6763	19.5148	20.2653	19.7016	70543		WD repeat-containing protein 26 OS=Mus musculus OX=10090 GN=Wdr26 PE=1 SV=3
Q78PY7	SND1_MOUSE	34.95	23	23	26.0401	25.1871	25.4298	25.5783	102088	Acetylation (N-term);Oxidation (M)	Staphylococcal nuclease domain-containing protein 1 OS=Mus musculus OX=10090 GN=Snd1 PE=1 SV=1
Q8R5C5	ACTY_MOUSE	17.02	6	4	24.6918	21.6129	22.4466	22.0143	42281	Oxidation (M)	Beta-centractin OS=Mus musculus OX=10090 GN=Actr1b PE=1 SV=1
Q63918	CAVN2_MOUSE	4.07	1	1	19.9513	NaN	19.0227	17.7842	46764		Caveolae-associated protein 2 OS=Mus musculus OX=10090 GN=Cavin2 PE=1 SV=3
P46467	VPS4B_MOUSE	6.31	2	2	22.4231	21.5427	21.4313	21.5086	49419		Vacuolar protein sorting-associated protein 4B OS=Mus musculus OX=10090 GN=Vps4b PE=1 SV=2
Q8BFW7	LPP_MOUSE	39.64	14	14	25.945	24.3712	25.7895	24.8623	65891	NBF;Oxidation (M)	Lipoma-preferred partner homolog OS=Mus musculus OX=10090 GN=Lpp PE=1 SV=1
P42208	SEPT2_MOUSE	54.02	12	12	24.4488	23.895	24.654	23.9584	41526	Oxidation (M)	Septin-2 OS=Mus musculus OX=10090 GN=Septin2 PE=1 SV=2
Q8BFY9	TNPO1_MOUSE	16.82	11	11	25.2714	23.8093	25.0894	23.6757	102357	Oxidation (M)	Transportin-1 OS=Mus musculus OX=10090 GN=Tnpo1 PE=1 SV=2
P50446	K2C6A_MOUSE	1.99	6	1	21.9838	22.2721	22.7845	22.6642	59335		Keratin, type II cytoskeletal 6A OS=Mus musculus OX=10090 GN=Krt6a PE=1 SV=3
P63242	IF5A1_MOUSE	59.09	8	8	25.867	24.8997	25.3975	24.9271	16832	Acetylation (N-term);NBF;Oxidation (M)	Eukaryotic translation initiation factor 5A-1 OS=Mus musculus OX=10090 GN=Eif5a PE=1 SV=2
Q99PT1	GDIR1_MOUSE	46.08	7	7	26.4723	26.4266	26.1214	26.7771	23407	Acetylation (N-term);Oxidation (M)	Rho GDP-dissociation inhibitor 1 OS=Mus musculus OX=10090 GN=Arhgdia PE=1 SV=3
Q8CDM8	FHI2A_MOUSE	1.57	1	1	20.7528	18.9647	19.6117	18.4903	86017		FHF complex subunit HOOK interacting protein 2A OS=Mus musculus OX=10090 GN=Fhip2a PE=1 SV=2
P27612	PLAP_MOUSE	21.54	12	12	24.2096	22.5759	22.9728	23.0641	87221	Oxidation (M)	Phospholipase A-2-activating protein OS=Mus musculus OX=10090 GN=Plaa PE=1 SV=4
O35654	DPOD2_MOUSE	2.99	1	1	20.3577	18.8084	19.8938	19.2422	51355		DNA polymerase delta subunit 2 OS=Mus musculus OX=10090 GN=Pold2 PE=1 SV=2
Q9JHS4	CLPX_MOUSE	4.1	2	2	22.4444	21.1764	21.4244	21.0131	69229		ATP-dependent Clp protease ATP-binding subunit clpX-like, mitochondrial OS=Mus musculus OX=10090 GN=Clpx PE=1 SV=2
O55131	SEPT7_MOUSE	25	8	8	25.0813	23.7995	24.4984	24.0359	50550	Oxidation (M)	Septin-7 OS=Mus musculus OX=10090 GN=Septin7 PE=1 SV=1
Q6PGB6	NAA50_MOUSE	26.04	5	5	23.0366	21.349	22.9847	22.0259	19414		N-alpha-acetyltransferase 50 OS=Mus musculus OX=10090 GN=Naa50 PE=1 SV=1
Q9WVF7	DPOE1_MOUSE	1.36	2	2	19.5952	NaN	16.1391	16.7668	262100		DNA polymerase epsilon catalytic subunit A OS=Mus musculus OX=10090 GN=Pole PE=1 SV=3
Q8BY89	CTL2_MOUSE	2.27	1	1	18.2839	18.8756	19.1947	20.0243	80110	Oxidation (M)	Choline transporter-like protein 2 OS=Mus musculus OX=10090 GN=Slc44a2 PE=1 SV=2
P06151	LDHA_MOUSE	41.57	14	14	28.4938	27.2714	28.267	27.6527	36499	NBF;Oxidation (M)	L-lactate dehydrogenase A chain OS=Mus musculus OX=10090 GN=Ldha PE=1 SV=3
P23591	FCL_MOUSE	4.98	1	1	20.4511	19.7667	19.6847	20.1602	35878		GDP-L-fucose synthase OS=Mus musculus OX=10090 GN=Gfus PE=1 SV=3
Q8BMJ2	SYLC_MOUSE	27.08	22	22	26.8504	25.3066	25.9847	25.4923	134192	NBF;Oxidation (M)	Leucine--tRNA ligase, cytoplasmic OS=Mus musculus OX=10090 GN=Lars1 PE=1 SV=2
Q61081	CDC37_MOUSE	23.22	7	7	26.2926	24.8044	25.6068	24.8904	44593	Oxidation (M)	Hsp90 co-chaperone Cdc37 OS=Mus musculus OX=10090 GN=Cdc37 PE=1 SV=1
P12265	BGLR_MOUSE	6.48	2	2	21.493	20.0736	20.5773	20.6601	74195	Oxidation (M)	Beta-glucuronidase OS=Mus musculus OX=10090 GN=Gusb PE=1 SV=2
P10404	ENV1_MOUSE	4.68	2	2	21.9851	21.2377	21.7426	22.1374	69613		MLV-related proviral Env polyprotein OS=Mus musculus OX=10090 PE=1 SV=3
Q9QUM9	PSA6_MOUSE	29.27	7	7	25.239	23.2961	25.2463	23.7594	27372		Proteasome subunit alpha type-6 OS=Mus musculus OX=10090 GN=Psma6 PE=1 SV=1
Q6IME9	K2C72_MOUSE	4.04	3	2	22.6142	21.7989	23.7389	19.9625	56750		Keratin, type II cytoskeletal 72 OS=Mus musculus OX=10090 GN=Krt72 PE=3 SV=1
P63024	VAMP3_MOUSE	47.57	3	3	22.1629	21.2651	22.0101	22.2161	11480	Acetylation (N-term);Oxidation (M)	Vesicle-associated membrane protein 3 OS=Mus musculus OX=10090 GN=Vamp3 PE=1 SV=1
Q9JHJ0	TMOD3_MOUSE	13.35	4	4	21.9206	20.7163	20.4818	21.2773	39503		Tropomodulin-3 OS=Mus musculus OX=10090 GN=Tmod3 PE=1 SV=1
Q9Z1M8	RED_MOUSE	5.39	2	2	19.7871	18.5354	17.3077	17.7852	65616	Oxidation (M)	Protein Red OS=Mus musculus OX=10090 GN=Ik PE=1 SV=2
O89017	LGMN_MOUSE	3.91	1	1	22.7694	21.5906	22.2502	22.4272	49373		Legumain OS=Mus musculus OX=10090 GN=Lgmn PE=1 SV=1
P70318	TIAR_MOUSE	2.81	1	1	18.6263	18.2191	18.3526	17.9115	43389		Nucleolysin TIAR OS=Mus musculus OX=10090 GN=Tial1 PE=1 SV=1
Q8BVU0	LRCH3_MOUSE	1.54	1	1	19.5608	16.4961	18.5373	16.9043	86341		DISP complex protein LRCH3 OS=Mus musculus OX=10090 GN=Lrch3 PE=1 SV=3
Q3UQ28	PXDN_MOUSE	0.68	1	1	19.8436	18.707	18.3795	18.4562	165103		Peroxidasin homolog OS=Mus musculus OX=10090 GN=Pxdn PE=1 SV=2
Q8N9S3	AHSA2_MOUSE	3.32	1	1	19.147	18.2599	18.2961	18.306	37648		Activator of 90 kDa heat shock protein ATPase homolog 2 OS=Mus musculus OX=10090 GN=Ahsa2 PE=1 SV=2
Q8R191	SNG3_MOUSE	6.55	1	1	17.8164	17.6182	18.0882	17.7796	24561		Synaptogyrin-3 OS=Mus musculus OX=10090 GN=Syngr3 PE=1 SV=1
Q6ZQ58	LARP1_MOUSE	16.04	9	9	23.9672	22.2358	22.9083	22.593	121125	Acetylation (N-term);Oxidation (M)	La-related protein 1 OS=Mus musculus OX=10090 GN=Larp1 PE=1 SV=3
Q8CES0	NAA30_MOUSE	10.99	2	2	21.2059	19.4502	20.3097	19.3941	39433	Acetylation (N-term)	N-alpha-acetyltransferase 30 OS=Mus musculus OX=10090 GN=Naa30 PE=1 SV=2
P59235	NUP43_MOUSE	14.74	4	4	23.5754	22.4787	23.1973	22.2608	41990	Oxidation (M)	Nucleoporin Nup43 OS=Mus musculus OX=10090 GN=Nup43 PE=1 SV=2
P70698	PYRG1_MOUSE	26.06	15	13	25.6865	24.4362	25.0401	23.9316	66682	Acetylation (N-term);Oxidation (M)	CTP synthase 1 OS=Mus musculus OX=10090 GN=Ctps1 PE=1 SV=2
P50431	GLYC_MOUSE	21.13	9	8	23.0429	21.8268	22.6934	21.4535	52601	Oxidation (M)	Serine hydroxymethyltransferase, cytosolic OS=Mus musculus OX=10090 GN=Shmt1 PE=1 SV=3
P47955	RLA1_MOUSE	14.04	1	1	23.9672	21.0397	23.3376	23.0789	11475		60S acidic ribosomal protein P1 OS=Mus musculus OX=10090 GN=Rplp1 PE=1 SV=1
Q9ERK4	XPO2_MOUSE	28.84	20	20	25.7821	24.6971	25.4266	24.4234	110455	Acetylation (N-term);NBF;Oxidation (M)	Exportin-2 OS=Mus musculus OX=10090 GN=Cse1l PE=1 SV=1
P45591	COF2_MOUSE	20.48	4	2	22.6134	20.1007	21.3305	20.9107	18710		Cofilin-2 OS=Mus musculus OX=10090 GN=Cfl2 PE=1 SV=1
O35841	API5_MOUSE	21.83	9	9	24.6595	23.6649	24.0443	23.7695	56785	Oxidation (M)	Apoptosis inhibitor 5 OS=Mus musculus OX=10090 GN=Api5 PE=1 SV=2
Q61136	PRP4B_MOUSE	2.48	3	3	21.695	18.9875	19.593	19.1612	116976		Serine/threonine-protein kinase PRP4 homolog OS=Mus musculus OX=10090 GN=Prpf4b PE=1 SV=3
Q8K2B3	SDHA_MOUSE	28.01	14	14	25.5725	24.0526	24.9406	24.4614	72585	Oxidation (M)	Succinate dehydrogenase [ubiquinone] flavoprotein subunit, mitochondrial OS=Mus musculus OX=10090 GN=Sdha PE=1 SV=1
Q3KNM2	MARH5_MOUSE	5.76	1	1	20.3518	19.4106	20.2477	19.3273	31232		E3 ubiquitin-protein ligase MARCHF5 OS=Mus musculus OX=10090 GN=Marchf5 PE=1 SV=1
Q8C3X8	LMF2_MOUSE	3.56	2	2	22.1948	21.1152	21.8904	22.2636	79997		Lipase maturation factor 2 OS=Mus musculus OX=10090 GN=Lmf2 PE=1 SV=1
Q8R3G1	PP1R8_MOUSE	7.41	2	2	20.1818	19.8396	19.8122	19.7492	38528	Oxidation (M)	Nuclear inhibitor of protein phosphatase 1 OS=Mus musculus OX=10090 GN=Ppp1r8 PE=1 SV=1
Q6P8X1	SNX6_MOUSE	24.38	9	9	22.8766	23.417	22.5172	24.3307	46649	Acetylation (N-term);NBF;Oxidation (M)	Sorting nexin-6 OS=Mus musculus OX=10090 GN=Snx6 PE=1 SV=2
P60122	RUVB1_MOUSE	37.72	12	12	26.0401	23.632	24.1565	24.1946	50214	Oxidation (M)	RuvB-like 1 OS=Mus musculus OX=10090 GN=Ruvbl1 PE=1 SV=1
P53612	PGTB2_MOUSE	6.49	2	2	21.6819	20.5807	21.5906	20.0899	37803		Geranylgeranyl transferase type-2 subunit beta OS=Mus musculus OX=10090 GN=Rabggtb PE=1 SV=2
Q922D4	PP6R3_MOUSE	3.2	2	2	22.5248	20.9454	21.4575	20.9629	94653		Serine/threonine-protein phosphatase 6 regulatory subunit 3 OS=Mus musculus OX=10090 GN=Ppp6r3 PE=1 SV=1
P31938	MP2K1_MOUSE	10.18	6	3	22.5952	20.5175	21.8044	21.3887	43474	Oxidation (M)	Dual specificity mitogen-activated protein kinase kinase 1 OS=Mus musculus OX=10090 GN=Map2k1 PE=1 SV=2
Q80ZK0	RT10_MOUSE	11.25	1	1	19.9144	18.5091	18.5424	19.2954	18698		28S ribosomal protein S10, mitochondrial OS=Mus musculus OX=10090 GN=Mrps10 PE=1 SV=1
Q58A65	JIP4_MOUSE	3.26	3	3	21.4385	19.3336	20.7174	19.6083	146219		C-Jun-amino-terminal kinase-interacting protein 4 OS=Mus musculus OX=10090 GN=Spag9 PE=1 SV=2
B1ARD6	SLFN9_MOUSE	7.47	5	5	24.1642	22.2963	23.9406	22.5666	103992	Oxidation (M)	Schlafen family member 9 OS=Mus musculus OX=10090 GN=Slfn9 PE=2 SV=1
P27546	MAP4_MOUSE	40	28	28	25.5014	23.4551	23.5522	22.8659	117429	Acetylation (N-term);Oxidation (M)	Microtubule-associated protein 4 OS=Mus musculus OX=10090 GN=Map4 PE=1 SV=3
Q8C0I1	ADAS_MOUSE	14.26	5	5	22.7287	21.2458	22.1399	21.4821	71684		Alkyldihydroxyacetonephosphate synthase, peroxisomal OS=Mus musculus OX=10090 GN=Agps PE=1 SV=1
Q00899	TYY1_MOUSE	4.83	1	1	17.9362	16.8197	16.4745	17.2523	44717		Transcriptional repressor protein YY1 OS=Mus musculus OX=10090 GN=Yy1 PE=1 SV=1
Q8C3I8	HGH1_MOUSE	12.21	3	3	21.2219	19.3644	20.3194	18.8324	42916		Protein HGH1 homolog OS=Mus musculus OX=10090 GN=Hgh1 PE=1 SV=1
Q8BK72	RT27_MOUSE	8.67	3	3	21.7015	18.9243	20.3372	21.2501	47779		28S ribosomal protein S27, mitochondrial OS=Mus musculus OX=10090 GN=Mrps27 PE=1 SV=2
Q9CZX0	ELP3_MOUSE	2.38	1	1	20.8906	18.0734	19.6322	18.8758	62385		Elongator complex protein 3 OS=Mus musculus OX=10090 GN=Elp3 PE=1 SV=1
Q8BG81	PDIP3_MOUSE	10.48	4	4	22.6167	21.4107	22.0177	21.7876	46132	Acetylation (N-term)	Polymerase delta-interacting protein 3 OS=Mus musculus OX=10090 GN=Poldip3 PE=1 SV=1
P21278	GNA11_MOUSE	13.09	3	3	21.9681	20.3306	21.0433	20.5574	42024		Guanine nucleotide-binding protein subunit alpha-11 OS=Mus musculus OX=10090 GN=Gna11 PE=1 SV=1
Q8R059	GALE_MOUSE	5.48	1	1	19.8734	18.5935	19.6925	17.3946	38225		UDP-glucose 4-epimerase OS=Mus musculus OX=10090 GN=Gale PE=1 SV=1
Q8VDL4	ADPGK_MOUSE	9.07	3	3	21.883	20.4751	21.0427	20.5977	53902		ADP-dependent glucokinase OS=Mus musculus OX=10090 GN=Adpgk PE=1 SV=2
P97351	RS3A_MOUSE	31.06	8	8	27.5014	25.1908	26.9539	25.9066	29885	Oxidation (M)	40S ribosomal protein S3a OS=Mus musculus OX=10090 GN=Rps3a PE=1 SV=3
Q9DAR7	DCPS_MOUSE	11.24	3	3	22.6297	22.0147	21.6365	21.9018	38988		m7GpppX diphosphatase OS=Mus musculus OX=10090 GN=Dcps PE=1 SV=1
P12815	PDCD6_MOUSE	5.76	1	1	20.7226	19.0517	20.6591	20.3826	21867		Programmed cell death protein 6 OS=Mus musculus OX=10090 GN=Pdcd6 PE=1 SV=2
Q810V0	MPP10_MOUSE	7.2	2	2	20.4623	18.8183	17.8623	18.9276	78735	Oxidation (M)	U3 small nucleolar ribonucleoprotein protein MPP10 OS=Mus musculus OX=10090 GN=Mphosph10 PE=1 SV=2
Q61166	MARE1_MOUSE	44.4	8	7	24.4984	23.5754	24.0609	23.9225	30016	Acetylation (N-term);NBF	Microtubule-associated protein RP/EB family member 1 OS=Mus musculus OX=10090 GN=Mapre1 PE=1 SV=3
Q921F2	TADBP_MOUSE	21.5	6	6	25.1946	23.5165	24.6971	23.976	44548	Oxidation (M)	TAR DNA-binding protein 43 OS=Mus musculus OX=10090 GN=Tardbp PE=1 SV=1
Q8VBT0	TMX1_MOUSE	4.32	1	1	20.5317	20.3108	20.234	20.2299	31396		Thioredoxin-related transmembrane protein 1 OS=Mus musculus OX=10090 GN=Tmx1 PE=1 SV=1
Q6PDI5	ECM29_MOUSE	7.55	8	8	23.2149	21.4697	22.8946	22.0854	203703	Oxidation (M)	Proteasome adapter and scaffold protein ECM29 OS=Mus musculus OX=10090 GN=Ecpas PE=1 SV=3
Q9DC50	OCTC_MOUSE	5.23	2	2	20.8756	NaN	18.9034	18.9152	70264		Peroxisomal carnitine O-octanoyltransferase OS=Mus musculus OX=10090 GN=Crot PE=1 SV=1
Q9QYH6	MAGD1_MOUSE	3.48	2	2	21.3191	19.2168	20.3557	20.0633	85670		Melanoma-associated antigen D1 OS=Mus musculus OX=10090 GN=Maged1 PE=1 SV=1
Q9QUJ7	ACSL4_MOUSE	4.64	2	2	23.2679	21.0655	22.1768	21.8984	79077		Long-chain-fatty-acid--CoA ligase 4 OS=Mus musculus OX=10090 GN=Acsl4 PE=1 SV=2
Q922R8	PDIA6_MOUSE	30.23	11	11	26.7771	25.8019	25.8264	26.0338	48100		Protein disulfide-isomerase A6 OS=Mus musculus OX=10090 GN=Pdia6 PE=1 SV=3
Q3B7Z2	OSBP1_MOUSE	11.8	5	5	23.0384	22.0862	22.8273	21.8907	88797		Oxysterol-binding protein 1 OS=Mus musculus OX=10090 GN=Osbp PE=1 SV=3
Q3UA37	QRIC1_MOUSE	3.47	2	2	22.1276	19.9818	21.434	20.7467	86556	Oxidation (M)	Transcriptional regulator QRICH1 OS=Mus musculus OX=10090 GN=Qrich1 PE=1 SV=1
Q61584	FXR1_MOUSE	13.74	6	5	23.6209	22.9963	23.3239	23.0394	76222	Oxidation (M)	Fragile X mental retardation syndrome-related protein 1 OS=Mus musculus OX=10090 GN=Fxr1 PE=1 SV=2
P08121	CO3A1_MOUSE	25.34	24	24	23.867	21.5583	21.1391	23.1023	138943	Acetylation (N-term);NBF;Oxidation (M)	Collagen alpha-1(III) chain OS=Mus musculus OX=10090 GN=Col3a1 PE=1 SV=4
G5E829	AT2B1_MOUSE	11.72	9	9	22.0319	21.4534	21.1789	20.9495	134747	Oxidation (M)	Plasma membrane calcium-transporting ATPase 1 OS=Mus musculus OX=10090 GN=Atp2b1 PE=1 SV=1
Q9CQT1	MTNA_MOUSE	7.32	2	2	20.6436	19.8198	20.4978	20.3601	39411		Methylthioribose-1-phosphate isomerase OS=Mus musculus OX=10090 GN=Mri1 PE=1 SV=1
P48024	EIF1_MOUSE	42.48	5	5	25.3066	24.019	24.8528	24.1174	12747	Acetylation (N-term)	Eukaryotic translation initiation factor 1 OS=Mus musculus OX=10090 GN=Eif1 PE=1 SV=2
Q569Z6	TR150_MOUSE	6.83	5	5	24.2821	23.7594	22.8822	23.0427	108178		Thyroid hormone receptor-associated protein 3 OS=Mus musculus OX=10090 GN=Thrap3 PE=1 SV=1
Q9QZ88	VPS29_MOUSE	12.09	2	2	22.7875	21.9255	22.5378	22.1266	20496		Vacuolar protein sorting-associated protein 29 OS=Mus musculus OX=10090 GN=Vps29 PE=1 SV=1
Q9CQR6	PPP6_MOUSE	9.51	2	2	21.9625	20.1319	22.4029	18.3446	35159	Oxidation (M)	Serine/threonine-protein phosphatase 6 catalytic subunit OS=Mus musculus OX=10090 GN=Ppp6c PE=1 SV=1
Q8VCW8	ACSF2_MOUSE	6.83	3	3	22.485	20.4783	21.8882	21.128	67951		Medium-chain acyl-CoA ligase ACSF2, mitochondrial OS=Mus musculus OX=10090 GN=Acsf2 PE=1 SV=1
Q99MD9	NASP_MOUSE	28.2	13	13	24.4676	22.911	22.9904	23.5983	83954	Acetylation (N-term);Oxidation (M)	Nuclear autoantigenic sperm protein OS=Mus musculus OX=10090 GN=Nasp PE=1 SV=2
O88544	CSN4_MOUSE	32.27	9	9	24.0526	23.2679	23.7182	23.48	46285	Oxidation (M)	COP9 signalosome complex subunit 4 OS=Mus musculus OX=10090 GN=Cops4 PE=1 SV=1
Q99NB9	SF3B1_MOUSE	23.47	21	21	25.8904	26.7389	23.2343	26.0484	145816	Oxidation (M)	Splicing factor 3B subunit 1 OS=Mus musculus OX=10090 GN=Sf3b1 PE=1 SV=1
Q9CQA3	SDHB_MOUSE	15.96	4	4	23.5754	21.7279	22.37	22.3311	31814	Oxidation (M)	Succinate dehydrogenase [ubiquinone] iron-sulfur subunit, mitochondrial OS=Mus musculus OX=10090 GN=Sdhb PE=1 SV=1
Q8BGA5	KRR1_MOUSE	6.32	2	2	21.687	19.997	20.7977	20.2639	43538		KRR1 small subunit processome component homolog OS=Mus musculus OX=10090 GN=Krr1 PE=2 SV=1
Q9CVB6	ARPC2_MOUSE	34.33	8	8	25.867	23.4676	24.7338	23.8288	34357	Oxidation (M)	Actin-related protein 2/3 complex subunit 2 OS=Mus musculus OX=10090 GN=Arpc2 PE=1 SV=3
Q1HFZ0	NSUN2_MOUSE	26.82	14	14	24.3376	22.3532	23.6096	22.7842	85452	Oxidation (M)	RNA cytosine C(5)-methyltransferase NSUN2 OS=Mus musculus OX=10090 GN=Nsun2 PE=1 SV=2
Q3UYK3	TBCD9_MOUSE	1.27	1	1	20.156	18.9476	18.3608	18.1612	143024	Acetylation (N-term)	TBC1 domain family member 9 OS=Mus musculus OX=10090 GN=Tbc1d9 PE=2 SV=2
Q80V26	IMPA3_MOUSE	7.58	1	1	18.2	NaN	17.4722	18.782	38616		Golgi-resident adenosine 3',5'-bisphosphate 3'-phosphatase OS=Mus musculus OX=10090 GN=Bpnt2 PE=1 SV=1
Q6ZPR5	NSMA3_MOUSE	3.4	2	2	20.6123	18.2941	19.1709	19.3591	93276		Sphingomyelin phosphodiesterase 4 OS=Mus musculus OX=10090 GN=Smpd4 PE=1 SV=2
Q6ZQ88	KDM1A_MOUSE	1.99	1	1	19.0585	16.9985	16.871	16.7452	92851		Lysine-specific histone demethylase 1A OS=Mus musculus OX=10090 GN=Kdm1a PE=1 SV=2
Q9WUK4	RFC2_MOUSE	27.22	7	7	24.019	20.6827	22.4782	20.5602	38725	Oxidation (M)	Replication factor C subunit 2 OS=Mus musculus OX=10090 GN=Rfc2 PE=1 SV=1
Q91YR1	TWF1_MOUSE	28.29	8	8	24.9361	22.5334	23.0176	23.2961	40079	Acetylation (N-term)	Twinfilin-1 OS=Mus musculus OX=10090 GN=Twf1 PE=1 SV=2
P97333	NRP1_MOUSE	3.36	2	2	19.1292	19.5933	17.9379	19.2967	103000		Neuropilin-1 OS=Mus musculus OX=10090 GN=Nrp1 PE=1 SV=2
Q60872	IF1A_MOUSE	14.58	2	2	24.2096	22.7164	23.848	23.391	16502		Eukaryotic translation initiation factor 1A OS=Mus musculus OX=10090 GN=Eif1a PE=2 SV=3
P19536	COX5B_MOUSE	17.97	2	2	24.5225	23.895	24.48	24.4984	13813	Oxidation (M)	Cytochrome c oxidase subunit 5B, mitochondrial OS=Mus musculus OX=10090 GN=Cox5b PE=1 SV=1
P61027	RAB10_MOUSE	5.5	1	1	21.627	17.5562	20.2627	20.0544	22541		Ras-related protein Rab-10 OS=Mus musculus OX=10090 GN=Rab10 PE=1 SV=1
P47791	GSHR_MOUSE	20	6	6	24.4298	23.895	23.8858	23.3376	53663	Acetylation (N-term);NBF	Glutathione reductase, mitochondrial OS=Mus musculus OX=10090 GN=Gsr PE=1 SV=3
Q9Z1T1	AP3B1_MOUSE	2.17	2	2	20.5942	19.6793	20.0243	19.0714	122740		AP-3 complex subunit beta-1 OS=Mus musculus OX=10090 GN=Ap3b1 PE=1 SV=2
Q9D8U8	SNX5_MOUSE	14.6	5	5	23.9672	23.3511	22.8	22.7343	46797	Acetylation (N-term)	Sorting nexin-5 OS=Mus musculus OX=10090 GN=Snx5 PE=1 SV=1
Q8BFY6	PEF1_MOUSE	4.73	1	1	21.1568	19.0736	20.5157	18.4175	29228	Oxidation (M)	Peflin OS=Mus musculus OX=10090 GN=Pef1 PE=1 SV=1
P14824	ANXA6_MOUSE	47.7	27	26	26.4676	26.726	26.2607	26.8385	75885	Oxidation (M)	Annexin A6 OS=Mus musculus OX=10090 GN=Anxa6 PE=1 SV=3
Q8R3N6	THOC1_MOUSE	3.5	2	2	22.1843	19.12	20.1563	18.1808	75436		THO complex subunit 1 OS=Mus musculus OX=10090 GN=Thoc1 PE=1 SV=1
Q8VCT3	AMPB_MOUSE	15.54	7	7	23.1498	21.6547	22.5843	21.8214	72416	Acetylation (N-term);Oxidation (M)	Aminopeptidase B OS=Mus musculus OX=10090 GN=Rnpep PE=1 SV=2
Q62384	ZPR1_MOUSE	15.47	5	5	22.3846	20.5888	21.5967	21.1378	50715	Oxidation (M)	Zinc finger protein ZPR1 OS=Mus musculus OX=10090 GN=Zpr1 PE=1 SV=1
P22892	AP1G1_MOUSE	5.23	3	3	21.5436	20.467	21.1896	20.4161	91350	Oxidation (M)	AP-1 complex subunit gamma-1 OS=Mus musculus OX=10090 GN=Ap1g1 PE=1 SV=3
Q8BT60	CPNE3_MOUSE	9.01	5	4	25.0484	23.3511	24.239	23.391	59585		Copine-3 OS=Mus musculus OX=10090 GN=Cpne3 PE=1 SV=2
Q9CQR2	RS21_MOUSE	66.27	6	6	26.8741	25.6125	26.8385	26.3745	9141	Acetylation (N-term);Oxidation (M)	40S ribosomal protein S21 OS=Mus musculus OX=10090 GN=Rps21 PE=1 SV=1
P84075	HPCA_MOUSE	13.47	2	2	21.5684	20.0942	20.805	20.3447	22427		Neuron-specific calcium-binding protein hippocalcin OS=Mus musculus OX=10090 GN=Hpca PE=1 SV=2
Q6PIP5	NUDC1_MOUSE	12.71	5	5	22.5092	21.3533	23.3239	21.8402	66705	Acetylation (N-term);Oxidation (M)	NudC domain-containing protein 1 OS=Mus musculus OX=10090 GN=Nudcd1 PE=1 SV=2
Q9WU40	MAN1_MOUSE	2.39	1	1	19.8646	15.6614	16.6905	17.8552	100307	Acetylation (N-term)	Inner nuclear membrane protein Man1 OS=Mus musculus OX=10090 GN=Lemd3 PE=1 SV=2
Q61490	CD166_MOUSE	4.8	2	2	20.0862	21.2324	20.7967	20.6942	65092		CD166 antigen OS=Mus musculus OX=10090 GN=Alcam PE=1 SV=3
Q6PA06	ATLA2_MOUSE	3.77	2	2	21.051	19.4857	20.8038	20.5805	66224		Atlastin-2 OS=Mus musculus OX=10090 GN=Atl2 PE=1 SV=1
Q6DFW4	NOP58_MOUSE	31.72	11	11	26.2372	24.6431	24.6811	25.002	60343	Oxidation (M)	Nucleolar protein 58 OS=Mus musculus OX=10090 GN=Nop58 PE=1 SV=1
O35864	CSN5_MOUSE	19.46	4	4	22.8146	22.7359	23.0961	23.417	37549	Oxidation (M)	COP9 signalosome complex subunit 5 OS=Mus musculus OX=10090 GN=Cops5 PE=1 SV=3
P57759	ERP29_MOUSE	26.72	5	5	23.5522	23.3101	23.2227	23.5638	28823	Oxidation (M)	Endoplasmic reticulum resident protein 29 OS=Mus musculus OX=10090 GN=Erp29 PE=1 SV=2
P49615	CDK5_MOUSE	4.79	1	1	17.687	18.2146	18.7395	18.4912	33288		Cyclin-dependent-like kinase 5 OS=Mus musculus OX=10090 GN=Cdk5 PE=1 SV=1
Q8BPB0	MOB1B_MOUSE	10.65	2	2	22.5666	21.4204	22.1287	22.0256	25091		MOB kinase activator 1B OS=Mus musculus OX=10090 GN=Mob1b PE=1 SV=3
O54775	CCN4_MOUSE	3	1	1	19.3842	18.117	18.9614	19.1694	40703		CCN family member 4 OS=Mus musculus OX=10090 GN=Ccn4 PE=2 SV=1
P25206	MCM3_MOUSE	43.23	26	26	25.5045	23.9316	25.1565	24.0772	91546	Acetylation (N-term);Oxidation (M)	DNA replication licensing factor MCM3 OS=Mus musculus OX=10090 GN=Mcm3 PE=1 SV=2
Q7M6Y3	PICAL_MOUSE	14.24	6	6	22.6705	21.1413	22.3971	21.6476	71543	Oxidation (M)	Phosphatidylinositol-binding clathrin assembly protein OS=Mus musculus OX=10090 GN=Picalm PE=1 SV=1
Q8BY71	HAT1_MOUSE	21.39	6	6	24.275	23.0391	24.0526	23.5285	49278	Oxidation (M)	Histone acetyltransferase type B catalytic subunit OS=Mus musculus OX=10090 GN=Hat1 PE=1 SV=1
Q71FD7	FBLI1_MOUSE	10.13	2	2	23.004	18.9409	22.2035	20.8917	41026		Filamin-binding LIM protein 1 OS=Mus musculus OX=10090 GN=Fblim1 PE=1 SV=2
Q8K2C7	OS9_MOUSE	3.27	1	1	NaN	19.1853	18.9346	19.1799	76108	Oxidation (M)	Protein OS-9 OS=Mus musculus OX=10090 GN=Os9 PE=1 SV=2
Q9D1C1	UBE2C_MOUSE	32.4	4	4	23.1511	22.1565	22.4891	22.0669	19606		Ubiquitin-conjugating enzyme E2 C OS=Mus musculus OX=10090 GN=Ube2c PE=1 SV=1
Q9CZ13	QCR1_MOUSE	24.38	7	7	23.5754	22.834	23.2961	23.2961	52852	Oxidation (M)	Cytochrome b-c1 complex subunit 1, mitochondrial OS=Mus musculus OX=10090 GN=Uqcrc1 PE=1 SV=2
Q923E4	SIR1_MOUSE	3.8	1	1	18.6307	15.4994	17.7578	NaN	80372		NAD-dependent protein deacetylase sirtuin-1 OS=Mus musculus OX=10090 GN=Sirt1 PE=1 SV=2
P50396	GDIA_MOUSE	26.62	14	10	24.4614	23.074	24.1095	23.5522	50522	Oxidation (M)	Rab GDP dissociation inhibitor alpha OS=Mus musculus OX=10090 GN=Gdi1 PE=1 SV=3
Q61140	BCAR1_MOUSE	2.4	1	1	19.8636	17.4618	17.1359	17.3029	94285		Breast cancer anti-estrogen resistance protein 1 OS=Mus musculus OX=10090 GN=Bcar1 PE=1 SV=2
P97454	SMAD5_MOUSE	2.8	1	1	20.8636	18.6381	19.5346	19.1905	52172		Mothers against decapentaplegic homolog 5 OS=Mus musculus OX=10090 GN=Smad5 PE=1 SV=2
Q9CQC9	SAR1B_MOUSE	17.17	3	2	22.8455	19.4245	22.6269	21.4269	22382	Oxidation (M)	GTP-binding protein SAR1b OS=Mus musculus OX=10090 GN=Sar1b PE=1 SV=1
Q8BMD8	SCMC1_MOUSE	14.11	5	5	22.2842	21.0965	21.7961	21.3536	52902	Oxidation (M)	Calcium-binding mitochondrial carrier protein SCaMC-1 OS=Mus musculus OX=10090 GN=Slc25a24 PE=1 SV=1
P04184	KITH_MOUSE	19.31	3	3	21.0112	18.2353	20.2732	16.8853	25776	Acetylation (N-term)	Thymidine kinase, cytosolic OS=Mus musculus OX=10090 GN=Tk1 PE=1 SV=3
Q8C0D5	EFL1_MOUSE	1.42	1	1	20.894	18.0515	19.3817	18.779	125777		Elongation factor-like GTPase 1 OS=Mus musculus OX=10090 GN=Efl1 PE=1 SV=1
Q6P9P6	KIF11_MOUSE	11.88	9	9	23.9043	22.7992	23.0347	23.3239	118027		Kinesin-like protein KIF11 OS=Mus musculus OX=10090 GN=Kif11 PE=1 SV=1
Q9D0F6	RFC5_MOUSE	9.73	3	3	22.8249	21.4143	22.2797	21.2878	38096	Oxidation (M)	Replication factor C subunit 5 OS=Mus musculus OX=10090 GN=Rfc5 PE=1 SV=1
Q99JI4	PSMD6_MOUSE	31.36	11	11	25.4953	24.1095	25.0894	24.3511	45536	Oxidation (M)	26S proteasome non-ATPase regulatory subunit 6 OS=Mus musculus OX=10090 GN=Psmd6 PE=1 SV=1
Q68FD5	CLH1_MOUSE	37.73	46	46	26.6998	25.3712	26.1015	25.7466	191557	Oxidation (M)	Clathrin heavy chain 1 OS=Mus musculus OX=10090 GN=Cltc PE=1 SV=3
Q921U8	SMTN_MOUSE	3.58	2	2	20.3709	17.7977	19.7225	18.1698	100289	Acetylation (N-term)	Smoothelin OS=Mus musculus OX=10090 GN=Smtn PE=1 SV=2
P10852	4F2_MOUSE	19.2	8	8	25.3511	24.0772	23.4551	24.3578	58337	Oxidation (M)	4F2 cell-surface antigen heavy chain OS=Mus musculus OX=10090 GN=Slc3a2 PE=1 SV=1
Q9D0E1	HNRPM_MOUSE	36.63	21	21	26.7129	25.3645	26.3049	25.604	77649	Acetylation (N-term);NBF;Oxidation (M)	Heterogeneous nuclear ribonucleoprotein M OS=Mus musculus OX=10090 GN=Hnrnpm PE=1 SV=3
Q9DBD5	PELP1_MOUSE	9.44	8	8	22.7244	21.5104	22.7635	21.9105	118069	Acetylation (N-term);NBF	Proline-, glutamic acid- and leucine-rich protein 1 OS=Mus musculus OX=10090 GN=Pelp1 PE=1 SV=2
Q922Q4	P5CR2_MOUSE	20.31	6	5	23.1672	20.7574	22.6295	21.2547	33659	Oxidation (M)	Pyrroline-5-carboxylate reductase 2 OS=Mus musculus OX=10090 GN=Pycr2 PE=1 SV=1
Q8BGK6	YLAT2_MOUSE	6.8	2	2	20.3685	19.8246	20.5967	20.9269	56771	Acetylation (N-term);Oxidation (M)	Y+L amino acid transporter 2 OS=Mus musculus OX=10090 GN=Slc7a6 PE=1 SV=1
Q9WU28	PFD5_MOUSE	33.12	3	3	21.4398	20.0083	21.2199	21.1275	17356	Acetylation (N-term);Oxidation (M)	Prefoldin subunit 5 OS=Mus musculus OX=10090 GN=Pfdn5 PE=1 SV=1
Q9D1Q6	ERP44_MOUSE	12.32	4	4	23.4676	23.0288	23.1116	22.6718	46853		Endoplasmic reticulum resident protein 44 OS=Mus musculus OX=10090 GN=Erp44 PE=1 SV=1
Q9Z1D1	EIF3G_MOUSE	24.69	6	6	24.6971	23.5165	24.2821	23.8858	35638		Eukaryotic translation initiation factor 3 subunit G OS=Mus musculus OX=10090 GN=Eif3g PE=1 SV=2
B2RRE7	OTUD4_MOUSE	7.95	5	5	22.2538	21.3784	21.4888	21.7809	123055	Acetylation (N-term);Oxidation (M)	OTU domain-containing protein 4 OS=Mus musculus OX=10090 GN=Otud4 PE=1 SV=1
Q9D0M0	EXOS7_MOUSE	12.71	3	3	22.5634	21.1353	22.2593	21.4132	31825	Acetylation (N-term)	Exosome complex exonuclease RRP42 OS=Mus musculus OX=10090 GN=Exosc7 PE=1 SV=2
Q9QYI4	DJB12_MOUSE	6.65	2	2	21.1579	20.6045	20.7792	20.0059	41988		DnaJ homolog subfamily B member 12 OS=Mus musculus OX=10090 GN=Dnajb12 PE=1 SV=2
P25976	UBF1_MOUSE	4.97	3	3	21.7836	20.8975	21.2496	21.1091	89509		Nucleolar transcription factor 1 OS=Mus musculus OX=10090 GN=Ubtf PE=1 SV=1
Q922V4	PLRG1_MOUSE	7.6	2	2	20.2219	19.8823	20.4931	20.0937	56938	Oxidation (M)	Pleiotropic regulator 1 OS=Mus musculus OX=10090 GN=Plrg1 PE=1 SV=1
Q8BGB7	ENOPH_MOUSE	9.73	2	2	20.884	20.2726	20.3337	20.4556	28600		Enolase-phosphatase E1 OS=Mus musculus OX=10090 GN=Enoph1 PE=1 SV=1
P35585	AP1M1_MOUSE	5.67	2	2	18.9862	19.7202	19.3551	24.7389	48543	Acetylation (N-term)	AP-1 complex subunit mu-1 OS=Mus musculus OX=10090 GN=Ap1m1 PE=1 SV=3
Q6NV83	SR140_MOUSE	14.67	10	10	22.8533	21.213	21.6995	21.4938	118261	Oxidation (M)	U2 snRNP-associated SURP motif-containing protein OS=Mus musculus OX=10090 GN=U2surp PE=1 SV=3
P35486	ODPA_MOUSE	23.08	7	7	26.6865	25.5725	26.7517	26.1449	43232	Oxidation (M)	Pyruvate dehydrogenase E1 component subunit alpha, somatic form, mitochondrial OS=Mus musculus OX=10090 GN=Pdha1 PE=1 SV=1
Q9CSU0	RPR1B_MOUSE	4.91	1	1	19.2058	17.5977	17.1937	18.474	36884		Regulation of nuclear pre-mRNA domain-containing protein 1B OS=Mus musculus OX=10090 GN=Rprd1b PE=1 SV=2
Q8BFQ4	WDR82_MOUSE	10.86	2	2	21.8681	20.394	20.8762	20.524	35079	Oxidation (M)	WD repeat-containing protein 82 OS=Mus musculus OX=10090 GN=Wdr82 PE=1 SV=1
P49442	INPP_MOUSE	3.03	1	1	20.3159	16.218	19.5643	18.3877	43346		Inositol polyphosphate 1-phosphatase OS=Mus musculus OX=10090 GN=Inpp1 PE=1 SV=2
Q9CXK8	NIP7_MOUSE	24.44	4	4	21.9526	19.463	21.1785	19.9995	20452	Oxidation (M)	60S ribosome subunit biogenesis protein NIP7 homolog OS=Mus musculus OX=10090 GN=Nip7 PE=1 SV=1
Q3UMF0	COBL1_MOUSE	1.89	2	2	19.2316	18.8571	19.8091	18.3229	137382	Oxidation (M)	Cordon-bleu protein-like 1 OS=Mus musculus OX=10090 GN=Cobll1 PE=1 SV=2
Q61598	GDIB_MOUSE	44.72	20	16	26.976	25.5812	26.604	25.8811	50537	NBF;Oxidation (M)	Rab GDP dissociation inhibitor beta OS=Mus musculus OX=10090 GN=Gdi2 PE=1 SV=1
Q5NCR9	NSRP1_MOUSE	3.32	1	1	15.9331	15.6474	14.8905	16.4659	63799		Nuclear speckle splicing regulatory protein 1 OS=Mus musculus OX=10090 GN=Nsrp1 PE=1 SV=1
P63038	CH60_MOUSE	61.95	25	25	26.632	25.9803	25.824	26.0317	60955	NBF;Oxidation (M)	60 kDa heat shock protein, mitochondrial OS=Mus musculus OX=10090 GN=Hspd1 PE=1 SV=1
Q91Y86	MK08_MOUSE	6.77	2	2	21.5774	19.0425	20.7928	19.7901	44229	Oxidation (M)	Mitogen-activated protein kinase 8 OS=Mus musculus OX=10090 GN=Mapk8 PE=1 SV=1
Q91V92	ACLY_MOUSE	25.85	22	22	25.8811	24.6757	25.4953	25.0609	119728	Oxidation (M)	ATP-citrate synthase OS=Mus musculus OX=10090 GN=Acly PE=1 SV=1
Q9CZW5	TOM70_MOUSE	10.15	6	6	24.275	22.7306	23.976	23.1086	67590	Oxidation (M)	Mitochondrial import receptor subunit TOM70 OS=Mus musculus OX=10090 GN=Tomm70 PE=1 SV=2
P08775	RPB1_MOUSE	5.03	7	7	21.8341	20.6141	20.8013	20.333	217176	Oxidation (M)	DNA-directed RNA polymerase II subunit RPB1 OS=Mus musculus OX=10090 GN=Polr2a PE=1 SV=3
Q8CFE4	SCYL2_MOUSE	1.51	1	1	19.6559	18.6125	19.5841	19.1305	103317		SCY1-like protein 2 OS=Mus musculus OX=10090 GN=Scyl2 PE=1 SV=1
Q9CZR8	EFTS_MOUSE	5.25	1	1	18.9765	17.0015	18.2081	17.2468	35334		Elongation factor Ts, mitochondrial OS=Mus musculus OX=10090 GN=Tsfm PE=1 SV=1
Q9EPK2	XRP2_MOUSE	2.88	1	1	19.6206	18.1608	18.7298	18.0757	39377		Protein XRP2 OS=Mus musculus OX=10090 GN=Rp2 PE=1 SV=3
P55096	ABCD3_MOUSE	7.28	3	3	22.4611	21.3123	21.8331	21.5903	75475		ATP-binding cassette sub-family D member 3 OS=Mus musculus OX=10090 GN=Abcd3 PE=1 SV=2
Q6ZWX6	IF2A_MOUSE	42.86	12	12	24.7338	23.7594	24.4923	24.4614	36108	Oxidation (M)	Eukaryotic translation initiation factor 2 subunit 1 OS=Mus musculus OX=10090 GN=Eif2s1 PE=1 SV=3
Q63870	CO7A1_MOUSE	2.24	4	4	23.654	22.2482	23.4041	21.8761	295232	NBF	Collagen alpha-1(VII) chain OS=Mus musculus OX=10090 GN=Col7a1 PE=1 SV=3
P62814	VATB2_MOUSE	18.79	6	6	21.8659	20.7277	21.4736	20.9269	56551	Acetylation (N-term);NBF;Oxidation (M)	V-type proton ATPase subunit B, brain isoform OS=Mus musculus OX=10090 GN=Atp6v1b2 PE=1 SV=1
Q99KY4	GAK_MOUSE	1.23	1	1	20.5787	18.5463	18.853	20.5863	143641		Cyclin-G-associated kinase OS=Mus musculus OX=10090 GN=Gak PE=1 SV=2
Q61543	GSLG1_MOUSE	2.89	3	3	23.5045	23.4298	22.9654	23.3101	133734	Oxidation (M)	Golgi apparatus protein 1 OS=Mus musculus OX=10090 GN=Glg1 PE=1 SV=1
Q9DBS1	TMM43_MOUSE	27.5	6	6	23.6431	21.8256	23.3511	23.9847	44783	Oxidation (M)	Transmembrane protein 43 OS=Mus musculus OX=10090 GN=Tmem43 PE=1 SV=1
Q9D6T0	NOSIP_MOUSE	6.98	1	1	19.6959	18.0642	18.0207	17.0923	33209		Nitric oxide synthase-interacting protein OS=Mus musculus OX=10090 GN=Nosip PE=1 SV=1
P31324	KAP3_MOUSE	8.89	4	2	21.9434	19.2844	20.8645	20.3192	46167		cAMP-dependent protein kinase type II-beta regulatory subunit OS=Mus musculus OX=10090 GN=Prkar2b PE=1 SV=3
Q8VEE4	RFA1_MOUSE	17.34	7	7	22.9393	21.2545	22.182	21.4327	69037		Replication protein A 70 kDa DNA-binding subunit OS=Mus musculus OX=10090 GN=Rpa1 PE=1 SV=1
O54692	ZW10_MOUSE	11.94	7	7	23.3778	21.8044	23.5522	21.8901	88063	Acetylation (N-term);Oxidation (M)	Centromere/kinetochore protein zw10 homolog OS=Mus musculus OX=10090 GN=Zw10 PE=1 SV=3
Q4VBE8	WDR18_MOUSE	11.83	4	4	24.1719	20.3847	21.5977	21.0448	47211		WD repeat-containing protein 18 OS=Mus musculus OX=10090 GN=Wdr18 PE=1 SV=1
Q9CYZ2	TPD54_MOUSE	12.73	2	2	20.8135	20.4896	20.2848	20.6943	24043	Oxidation (M)	Tumor protein D54 OS=Mus musculus OX=10090 GN=Tpd52l2 PE=1 SV=1
Q3U962	CO5A2_MOUSE	34.07	27	27	27.2353	26.1965	26.6458	25.5492	145018	Acetylation (N-term);NBF;Oxidation (M)	Collagen alpha-2(V) chain OS=Mus musculus OX=10090 GN=Col5a2 PE=1 SV=1
O70305	ATX2_MOUSE	3.27	3	3	20.9289	21.6509	20.0015	21.8167	136485	Oxidation (M)	Ataxin-2 OS=Mus musculus OX=10090 GN=Atxn2 PE=1 SV=1
Q8K2I1	FNTB_MOUSE	3.66	1	1	20.3023	17.4109	19.3977	18.0626	48820		Protein farnesyltransferase subunit beta OS=Mus musculus OX=10090 GN=Fntb PE=1 SV=1
P20664	PRI1_MOUSE	8.87	3	3	22.0758	21.278	21.2598	21.5148	49295	Acetylation (N-term);Oxidation (M)	DNA primase small subunit OS=Mus musculus OX=10090 GN=Prim1 PE=1 SV=1
P70297	STAM1_MOUSE	7.85	2	2	20.8252	18.7924	19.5201	17.9541	59771	Oxidation (M)	Signal transducing adapter molecule 1 OS=Mus musculus OX=10090 GN=Stam PE=1 SV=3
Q91YP2	NEUL_MOUSE	7.39	4	4	21.8564	20.5332	21.8462	20.9599	80429		Neurolysin, mitochondrial OS=Mus musculus OX=10090 GN=Nln PE=1 SV=1
Q6PDY2	AEDO_MOUSE	17.97	2	2	21.2382	19.4077	21.1114	20.0767	28372		2-aminoethanethiol dioxygenase OS=Mus musculus OX=10090 GN=Ado PE=1 SV=2
Q9JHU4	DYHC1_MOUSE	25.13	86	86	25.976	24.9977	25.2317	25.4645	532045	Acetylation (N-term);Oxidation (M)	Cytoplasmic dynein 1 heavy chain 1 OS=Mus musculus OX=10090 GN=Dync1h1 PE=1 SV=2
Q9EPC1	PARVA_MOUSE	15.32	4	4	22.6963	22.027	21.7673	22.5153	42330		Alpha-parvin OS=Mus musculus OX=10090 GN=Parva PE=1 SV=1
Q9JIX8	ACINU_MOUSE	7.03	7	7	22.9897	21.2548	21.0339	20.9801	150719		Apoptotic chromatin condensation inducer in the nucleus OS=Mus musculus OX=10090 GN=Acin1 PE=1 SV=3
Q9D0I8	MRT4_MOUSE	15.06	3	3	22.7015	21.8057	22.5133	22.1489	27546		mRNA turnover protein 4 homolog OS=Mus musculus OX=10090 GN=Mrto4 PE=1 SV=1
Q64449	MRC2_MOUSE	0.88	1	1	20.0856	17.4994	18.5281	19.6968	167074		C-type mannose receptor 2 OS=Mus musculus OX=10090 GN=Mrc2 PE=1 SV=3
E9Q5F9	SETD2_MOUSE	1.1	2	2	21.2225	20.1464	19.5854	20.9817	285663		Histone-lysine N-methyltransferase SETD2 OS=Mus musculus OX=10090 GN=Setd2 PE=1 SV=1
Q8CHK3	MBOA7_MOUSE	3.38	1	1	17.8838	NaN	18.4019	17.2225	53436		Lysophospholipid acyltransferase 7 OS=Mus musculus OX=10090 GN=Mboat7 PE=1 SV=1
P56135	ATPK_MOUSE	13.64	1	1	23.5404	21.9256	23.0913	22.5539	10344		ATP synthase subunit f, mitochondrial OS=Mus musculus OX=10090 GN=Atp5mf PE=1 SV=3
Q8K2V6	IPO11_MOUSE	4.62	3	3	21.2315	18.8311	20.3516	19.3658	112416		Importin-11 OS=Mus musculus OX=10090 GN=Ipo11 PE=1 SV=1
Q8R1F1	NIBA2_MOUSE	32.31	13	13	25.3031	23.6096	24.4041	23.8191	84819	Oxidation (M)	Protein Niban 2 OS=Mus musculus OX=10090 GN=Niban2 PE=1 SV=2
P48758	CBR1_MOUSE	10.83	1	1	19.4876	18.5971	19.4228	19.0438	30641		Carbonyl reductase [NADPH] 1 OS=Mus musculus OX=10090 GN=Cbr1 PE=1 SV=3
Q9CPY7	AMPL_MOUSE	24.47	9	9	25.0233	23.867	24.5812	24.0105	56141	Oxidation (M)	Cytosol aminopeptidase OS=Mus musculus OX=10090 GN=Lap3 PE=1 SV=3
Q8K072	REEP4_MOUSE	8.56	1	1	19.8533	18.6644	18.7474	19.0602	29691		Receptor expression-enhancing protein 4 OS=Mus musculus OX=10090 GN=Reep4 PE=1 SV=1
Q9DB42	ZN593_MOUSE	8.96	1	1	18.7489	17.2826	18.9278	18.5273	15147	Oxidation (M)	Zinc finger protein 593 OS=Mus musculus OX=10090 GN=Znf593 PE=1 SV=2
Q9Z172	SUMO3_MOUSE	10.91	1	1	25.6068	24.5463	25.1253	24.6971	12430		Small ubiquitin-related modifier 3 OS=Mus musculus OX=10090 GN=Sumo3 PE=1 SV=1
Q78JE5	FBX22_MOUSE	4.23	1	1	16.7893	NaN	17.2755	17.2354	44203	Acetylation (N-term);Oxidation (M)	F-box only protein 22 OS=Mus musculus OX=10090 GN=Fbxo22 PE=1 SV=2
Q3THE2	ML12B_MOUSE	12.21	4	2	25.9157	24.9584	24.7389	24.989	19779		Myosin regulatory light chain 12B OS=Mus musculus OX=10090 GN=Myl12b PE=1 SV=2
D3YXK2	SAFB1_MOUSE	7.58	4	4	24.1015	21.745	22.1114	20.6523	105104	Acetylation (N-term);Oxidation (M)	Scaffold attachment factor B1 OS=Mus musculus OX=10090 GN=Safb PE=1 SV=2
O35343	IMA3_MOUSE	5.57	2	1	19.4486	NaN	19.3823	18.1567	57923		Importin subunit alpha-3 OS=Mus musculus OX=10090 GN=Kpna4 PE=1 SV=1
P24547	IMDH2_MOUSE	34.63	15	14	25.6944	24.3444	25.3101	24.5105	55815	Oxidation (M)	Inosine-5'-monophosphate dehydrogenase 2 OS=Mus musculus OX=10090 GN=Impdh2 PE=1 SV=2
Q9CWW6	PIN4_MOUSE	9.16	1	1	20.1875	17.5815	19.8114	19.0048	13815		Peptidyl-prolyl cis-trans isomerase NIMA-interacting 4 OS=Mus musculus OX=10090 GN=Pin4 PE=1 SV=1
P57776	EF1D_MOUSE	37.01	9	8	26.3528	25.7871	26.1585	25.9383	31293	Acetylation (N-term);Oxidation (M)	Elongation factor 1-delta OS=Mus musculus OX=10090 GN=Eef1d PE=1 SV=3
Q62383	SPT6H_MOUSE	8.4	10	10	22.5113	21.2641	21.5965	20.0502	199086	Oxidation (M)	Transcription elongation factor SPT6 OS=Mus musculus OX=10090 GN=Supt6h PE=1 SV=2
Q9DCD2	SYF1_MOUSE	9.59	5	5	22.1691	20.797	22.5461	21.6362	99988	Oxidation (M)	Pre-mRNA-splicing factor SYF1 OS=Mus musculus OX=10090 GN=Xab2 PE=1 SV=1
Q8CIG8	ANM5_MOUSE	13.66	6	6	23.8764	22.4527	23.3511	22.9465	72680	Oxidation (M)	Protein arginine N-methyltransferase 5 OS=Mus musculus OX=10090 GN=Prmt5 PE=1 SV=3
Q8BJL1	FBX30_MOUSE	4.29	2	2	20.0922	18.7914	20.1387	19.3389	82687	Oxidation (M)	F-box only protein 30 OS=Mus musculus OX=10090 GN=Fbxo30 PE=1 SV=2
Q99L47	F10A1_MOUSE	16.71	6	6	25.239	24.4614	24.2096	24.4738	41656	Oxidation (M)	Hsc70-interacting protein OS=Mus musculus OX=10090 GN=St13 PE=1 SV=1
Q80W54	FACE1_MOUSE	3.37	1	1	19.3479	19.4544	20.0457	19.5762	54735	Oxidation (M)	CAAX prenyl protease 1 homolog OS=Mus musculus OX=10090 GN=Zmpste24 PE=1 SV=2
P26039	TLN1_MOUSE	34.51	68	58	30.0349	29.158	29.1628	29.7195	269821	NBF;Oxidation (M)	Talin-1 OS=Mus musculus OX=10090 GN=Tln1 PE=1 SV=2
P06745	G6PI_MOUSE	19.35	9	9	25.2856	24.5285	24.4234	24.5463	62767	Oxidation (M)	Glucose-6-phosphate isomerase OS=Mus musculus OX=10090 GN=Gpi PE=1 SV=4
Q60865	CAPR1_MOUSE	18.67	8	8	25.7155	24.7745	24.417	24.5225	78169	Acetylation (N-term);Oxidation (M)	Caprin-1 OS=Mus musculus OX=10090 GN=Caprin1 PE=1 SV=2
Q69ZR2	HECD1_MOUSE	3.21	5	5	21.8677	20.2469	21.1177	20.2926	290086	Oxidation (M)	E3 ubiquitin-protein ligase HECTD1 OS=Mus musculus OX=10090 GN=Hectd1 PE=1 SV=2
Q3UVK0	ERMP1_MOUSE	2.56	2	2	20.416	19.7577	19.5739	20.0884	100148		Endoplasmic reticulum metallopeptidase 1 OS=Mus musculus OX=10090 GN=Ermp1 PE=1 SV=2
Q9DC51	GNAI3_MOUSE	9.04	3	2	22.3517	20.904	22.1139	20.9634	40538		Guanine nucleotide-binding protein G(i) subunit alpha-3 OS=Mus musculus OX=10090 GN=Gnai3 PE=1 SV=3
Q8BIW1	PRUN1_MOUSE	6.39	2	2	21.268	20.7683	21.2163	20.951	50239	Oxidation (M)	Exopolyphosphatase PRUNE1 OS=Mus musculus OX=10090 GN=Prune1 PE=1 SV=1
Q9D281	NXP20_MOUSE	11.78	4	4	22.4973	16.7729	21.8328	18.067	61013		Protein Noxp20 OS=Mus musculus OX=10090 GN=Fam114a1 PE=1 SV=1
Q8BMA6	SRP68_MOUSE	16.48	9	9	22.8728	21.2971	21.905	21.7138	70574		Signal recognition particle subunit SRP68 OS=Mus musculus OX=10090 GN=Srp68 PE=1 SV=2
Q6P1B1	XPP1_MOUSE	30.5	12	12	24.5983	23.0477	23.895	23.0649	69591	Oxidation (M)	Xaa-Pro aminopeptidase 1 OS=Mus musculus OX=10090 GN=Xpnpep1 PE=1 SV=1
P58044	IDI1_MOUSE	22.91	4	4	23.4676	21.6724	22.965	22.6053	26289	Oxidation (M)	Isopentenyl-diphosphate Delta-isomerase 1 OS=Mus musculus OX=10090 GN=Idi1 PE=1 SV=1
Q8BHN3	GANAB_MOUSE	30.19	24	24	24.7234	23.9225	24.002	24.0526	106911	Oxidation (M)	Neutral alpha-glucosidase AB OS=Mus musculus OX=10090 GN=Ganab PE=1 SV=1
O70503	DHB12_MOUSE	10.26	2	2	22.8765	21.2671	21.8175	21.4518	34742		Very-long-chain 3-oxoacyl-CoA reductase OS=Mus musculus OX=10090 GN=Hsd17b12 PE=1 SV=1
Q9CQL4	RM20_MOUSE	21.48	2	2	19.793	19.5594	19.3154	18.7061	17595		39S ribosomal protein L20, mitochondrial OS=Mus musculus OX=10090 GN=Mrpl20 PE=1 SV=1
P36552	HEM6_MOUSE	6.77	2	2	20.7581	17.4734	18.5777	19.7596	49715		Oxygen-dependent coproporphyrinogen-III oxidase, mitochondrial OS=Mus musculus OX=10090 GN=Cpox PE=1 SV=2
Q9D824	FIP1_MOUSE	5.16	2	2	20.4189	18.9945	19.6282	18.0377	64959		Pre-mRNA 3'-end-processing factor FIP1 OS=Mus musculus OX=10090 GN=Fip1l1 PE=1 SV=1
Q571I9	A16A1_MOUSE	1.75	1	1	19.3916	18.1709	18.6855	18.5971	84756		Aldehyde dehydrogenase family 16 member A1 OS=Mus musculus OX=10090 GN=Aldh16a1 PE=1 SV=2
Q9CYI4	LUC7L_MOUSE	2.96	2	1	20.8995	20.8872	22.09	21.3255	43934	Oxidation (M)	Putative RNA-binding protein Luc7-like 1 OS=Mus musculus OX=10090 GN=Luc7l PE=1 SV=2
Q7TNC4	LC7L2_MOUSE	10.46	4	3	24.275	22.8747	23.4425	23.4676	46583	Oxidation (M)	Putative RNA-binding protein Luc7-like 2 OS=Mus musculus OX=10090 GN=Luc7l2 PE=1 SV=1
P62996	TRA2B_MOUSE	13.89	3	3	26.4707	23.5983	25.9955	26.604	33666		Transformer-2 protein homolog beta OS=Mus musculus OX=10090 GN=Tra2b PE=1 SV=1
Q921E6	EED_MOUSE	6.58	2	2	20.682	19.5175	20.7626	20.8788	50198	Oxidation (M)	Polycomb protein EED OS=Mus musculus OX=10090 GN=Eed PE=1 SV=1
P62254	UB2G1_MOUSE	10.59	1	1	19.4799	16.5341	18.772	18.1166	19509		Ubiquitin-conjugating enzyme E2 G1 OS=Mus musculus OX=10090 GN=Ube2g1 PE=1 SV=3
Q9CRT8	XPOT_MOUSE	6.96	4	4	21.9716	20.4917	21.264	20.5884	109734	Acetylation (N-term);Oxidation (M)	Exportin-T OS=Mus musculus OX=10090 GN=Xpot PE=1 SV=3
Q9Z2I8	SUCB2_MOUSE	12.24	4	4	22.5196	20.906	21.5629	21.3441	46840	Oxidation (M)	Succinate--CoA ligase [GDP-forming] subunit beta, mitochondrial OS=Mus musculus OX=10090 GN=Suclg2 PE=1 SV=3
Q8QZT1	THIL_MOUSE	29.72	8	8	23.9672	21.5698	23.2444	22.7143	44816	Oxidation (M)	Acetyl-CoA acetyltransferase, mitochondrial OS=Mus musculus OX=10090 GN=Acat1 PE=1 SV=1
P97789	XRN1_MOUSE	1.69	2	2	19.7427	19.2236	20.701	19.768	194307		5'-3' exoribonuclease 1 OS=Mus musculus OX=10090 GN=Xrn1 PE=1 SV=1
P55194	3BP1_MOUSE	6.03	3	3	20.2793	19.0394	19.9142	19.3674	74172		SH3 domain-binding protein 1 OS=Mus musculus OX=10090 GN=Sh3bp1 PE=1 SV=3
Q9JJA4	WDR12_MOUSE	27.9	8	8	23.9933	22.0794	23.3376	22.5846	47346	Oxidation (M)	Ribosome biogenesis protein WDR12 OS=Mus musculus OX=10090 GN=Wdr12 PE=1 SV=1
Q78WZ7	RPA43_MOUSE	4.85	1	1	20.6284	18.0104	18.1427	18.1424	36721		DNA-directed RNA polymerase I subunit RPA43 OS=Mus musculus OX=10090 GN=Polr1f PE=1 SV=1
Q9CPV4	GLOD4_MOUSE	23.49	5	5	22.7562	21.61	22.0047	21.9919	33317		Glyoxalase domain-containing protein 4 OS=Mus musculus OX=10090 GN=Glod4 PE=1 SV=1
P49817	CAV1_MOUSE	30.9	4	4	24.824	23.9495	24.317	24.3578	20539		Caveolin-1 OS=Mus musculus OX=10090 GN=Cav1 PE=1 SV=1
Q61316	HSP74_MOUSE	33.41	22	21	26.8264	24.8191	26.9869	25.0526	94133	Acetylation (N-term);NBF;Oxidation (M)	Heat shock 70 kDa protein 4 OS=Mus musculus OX=10090 GN=Hspa4 PE=1 SV=1
Q02788	CO6A2_MOUSE	1.45	1	1	18.7394	17.5172	NaN	17.9291	110334		Collagen alpha-2(VI) chain OS=Mus musculus OX=10090 GN=Col6a2 PE=1 SV=3
Q8BH74	NU107_MOUSE	9.18	7	7	23.5754	22.9787	23.6757	23.8288	106717	Oxidation (M)	Nuclear pore complex protein Nup107 OS=Mus musculus OX=10090 GN=Nup107 PE=1 SV=1
Q640N1	AEBP1_MOUSE	1.77	1	1	18.6386	18.8363	17.1331	18.3618	128365		Adipocyte enhancer-binding protein 1 OS=Mus musculus OX=10090 GN=Aebp1 PE=1 SV=1
Q9D787	PPIL2_MOUSE	1.92	1	1	20.6522	19.3424	20.0549	18.648	59065		RING-type E3 ubiquitin-protein ligase PPIL2 OS=Mus musculus OX=10090 GN=Ppil2 PE=1 SV=2
Q8R180	ERO1A_MOUSE	10.99	4	4	21.5704	21.563	21.278	22.0018	54084	Oxidation (M)	ERO1-like protein alpha OS=Mus musculus OX=10090 GN=Ero1a PE=1 SV=2
Q923W1	TGS1_MOUSE	1.99	1	1	17.5865	16.7858	19.6131	NaN	96790		Trimethylguanosine synthase OS=Mus musculus OX=10090 GN=Tgs1 PE=1 SV=2
Q99L04	DHRS1_MOUSE	6.39	2	2	21.1575	19.4484	20.276	20.3539	34005		Dehydrogenase/reductase SDR family member 1 OS=Mus musculus OX=10090 GN=Dhrs1 PE=1 SV=1
Q9CQ19	MYL9_MOUSE	29.65	5	3	22.7352	21.6611	21.9942	22.5503	19854	Oxidation (M)	Myosin regulatory light polypeptide 9 OS=Mus musculus OX=10090 GN=Myl9 PE=1 SV=3
Q61656	DDX5_MOUSE	21.17	13	10	26.1661	25.2207	25.9203	25.4769	69290	NBF;Oxidation (M)	Probable ATP-dependent RNA helicase DDX5 OS=Mus musculus OX=10090 GN=Ddx5 PE=1 SV=2
Q6A0A2	LAR4B_MOUSE	3.91	2	2	20.431	18.3574	18.7421	18.3003	81627		La-related protein 4B OS=Mus musculus OX=10090 GN=Larp4b PE=1 SV=2
Q8BHG1	NRDC_MOUSE	6.37	4	4	24.5696	24.4234	22.7054	22.5888	132891	Oxidation (M)	Nardilysin OS=Mus musculus OX=10090 GN=Nrdc PE=1 SV=1
Q8K1J6	TRNT1_MOUSE	7.83	2	2	21.6739	21.1942	21.5311	21.0946	49895		CCA tRNA nucleotidyltransferase 1, mitochondrial OS=Mus musculus OX=10090 GN=Trnt1 PE=1 SV=1
Q9JM76	ARPC3_MOUSE	24.72	4	4	25.8409	23.632	25.5638	24.275	20525	Oxidation (M)	Actin-related protein 2/3 complex subunit 3 OS=Mus musculus OX=10090 GN=Arpc3 PE=1 SV=3
P59997	KDM2A_MOUSE	3.36	3	3	22.0332	20.3617	21.6767	20.9603	132680		Lysine-specific demethylase 2A OS=Mus musculus OX=10090 GN=Kdm2a PE=1 SV=2
P83093	STIM2_MOUSE	2.55	1	1	18.5333	18.8022	17.951	19.2583	83925	NBF	Stromal interaction molecule 2 OS=Mus musculus OX=10090 GN=Stim2 PE=1 SV=2
Q8BW96	KCC1D_MOUSE	4.42	2	1	19.4847	17.0122	18.4467	17.1252	42919		Calcium/calmodulin-dependent protein kinase type 1D OS=Mus musculus OX=10090 GN=Camk1d PE=1 SV=2
P63280	UBC9_MOUSE	7.59	1	1	21.0581	19.7997	20.6993	20.7811	18007		SUMO-conjugating enzyme UBC9 OS=Mus musculus OX=10090 GN=Ube2i PE=1 SV=1
P24860	CCNB1_MOUSE	3.02	1	1	20.482	18.0486	19.9352	18.9405	48052		G2/mitotic-specific cyclin-B1 OS=Mus musculus OX=10090 GN=Ccnb1 PE=1 SV=3
Q8C8U0	LIPB1_MOUSE	10.42	7	7	22.5081	20.9904	21.5363	21.0998	108540	Oxidation (M)	Liprin-beta-1 OS=Mus musculus OX=10090 GN=Ppfibp1 PE=1 SV=3
Q9CPR4	RL17_MOUSE	21.74	3	3	26.4908	25.1871	26.0041	25.7363	21423		60S ribosomal protein L17 OS=Mus musculus OX=10090 GN=Rpl17 PE=1 SV=3
Q9CWK8	SNX2_MOUSE	15.03	6	5	22.6011	21.672	21.7293	20.5156	58471	Oxidation (M)	Sorting nexin-2 OS=Mus musculus OX=10090 GN=Snx2 PE=1 SV=2
P14152	MDHC_MOUSE	14.67	4	4	23.4425	22.127	22.8126	22.8418	36511	Oxidation (M)	Malate dehydrogenase, cytoplasmic OS=Mus musculus OX=10090 GN=Mdh1 PE=1 SV=3
D3YZP9	CCDC6_MOUSE	7.04	2	2	21.9012	18.8389	19.6531	20.0091	52939		Coiled-coil domain-containing protein 6 OS=Mus musculus OX=10090 GN=Ccdc6 PE=1 SV=1
Q9CQA5	MED4_MOUSE	5.19	1	1	NaN	17.8143	15.9057	17.6963	29781	Oxidation (M)	Mediator of RNA polymerase II transcription subunit 4 OS=Mus musculus OX=10090 GN=Med4 PE=2 SV=1
Q6P069	SORCN_MOUSE	17.17	3	3	22.9565	21.3527	22.7632	21.6047	21627	Oxidation (M)	Sorcin OS=Mus musculus OX=10090 GN=Sri PE=1 SV=1
O88545	CSN6_MOUSE	4.63	1	1	22.114	20.7082	22.027	21.1058	35880		COP9 signalosome complex subunit 6 OS=Mus musculus OX=10090 GN=Cops6 PE=1 SV=1
B8ZXI1	QTRT2_MOUSE	15.9	4	4	22.1341	19.4783	22.0495	20.9274	46288	Oxidation (M)	Queuine tRNA-ribosyltransferase accessory subunit 2 OS=Mus musculus OX=10090 GN=Qtrt2 PE=1 SV=2
P32020	SCP2_MOUSE	2.01	1	1	18.5811	18.4536	18.6416	18.3997	59126		Sterol carrier protein 2 OS=Mus musculus OX=10090 GN=Scp2 PE=1 SV=3
Q71LX4	TLN2_MOUSE	0.67	11	1	19.5583	18.2502	18.2684	18.6482	253621	Acetylation (N-term)	Talin-2 OS=Mus musculus OX=10090 GN=Tln2 PE=1 SV=3
O08582	GTPB1_MOUSE	6.14	3	3	22.213	20.5421	21.1552	20.7242	72301		GTP-binding protein 1 OS=Mus musculus OX=10090 GN=Gtpbp1 PE=1 SV=2
P28658	ATX10_MOUSE	25.26	10	10	25.9847	23.2679	25.4298	23.7695	53707	Oxidation (M)	Ataxin-10 OS=Mus musculus OX=10090 GN=Atxn10 PE=1 SV=2
Q8BGD9	IF4B_MOUSE	17.68	9	9	25.7846	25.002	24.7995	24.0275	68840	Oxidation (M)	Eukaryotic translation initiation factor 4B OS=Mus musculus OX=10090 GN=Eif4b PE=1 SV=1
P58871	TB182_MOUSE	15.23	15	15	23.5404	21.1676	21.6313	20.6733	181825	DCP;NBF	182 kDa tankyrase-1-binding protein OS=Mus musculus OX=10090 GN=Tnks1bp1 PE=1 SV=2
P28653	PGS1_MOUSE	18.16	5	5	22.625	22.0016	21.5174	21.9444	41639		Biglycan OS=Mus musculus OX=10090 GN=Bgn PE=1 SV=1
Q9DC23	DJC10_MOUSE	4.54	3	3	21.2514	21.1889	20.8104	21.1012	90583		DnaJ homolog subfamily C member 10 OS=Mus musculus OX=10090 GN=Dnajc10 PE=1 SV=2
Q8VHK9	DHX36_MOUSE	6.89	4	4	21.6704	19.3529	20.921	20.4691	113883	Oxidation (M)	ATP-dependent DNA/RNA helicase DHX36 OS=Mus musculus OX=10090 GN=Dhx36 PE=1 SV=2
Q9QZD9	EIF3I_MOUSE	42.46	10	10	25.0359	24.141	24.8433	24.5285	36461	Oxidation (M)	Eukaryotic translation initiation factor 3 subunit I OS=Mus musculus OX=10090 GN=Eif3i PE=1 SV=1
Q99P31	HPBP1_MOUSE	12.32	3	3	23.3101	21.4369	22.7923	21.8992	39167	Oxidation (M)	Hsp70-binding protein 1 OS=Mus musculus OX=10090 GN=Hspbp1 PE=1 SV=1
Q6P9L6	KIF15_MOUSE	1.01	1	1	19.0626	17.2826	19.7176	19.2904	160120		Kinesin-like protein KIF15 OS=Mus musculus OX=10090 GN=Kif15 PE=1 SV=1
Q9CXW4	RL11_MOUSE	12.92	2	2	25.8409	24.5812	25.4105	24.9847	20252		60S ribosomal protein L11 OS=Mus musculus OX=10090 GN=Rpl11 PE=1 SV=4
Q3U308	CTU2_MOUSE	9.14	3	3	20.9752	18.7337	20.3966	18.9911	56105		Cytoplasmic tRNA 2-thiolation protein 2 OS=Mus musculus OX=10090 GN=Ctu2 PE=1 SV=1
Q6NZN0	RBM26_MOUSE	1.19	1	1	16.7636	16.1487	17.0788	16.4742	114143		RNA-binding protein 26 OS=Mus musculus OX=10090 GN=Rbm26 PE=1 SV=2
Q91YP3	DEOC_MOUSE	3.77	1	1	20.6214	18.2849	19.2183	19.1229	34975		Deoxyribose-phosphate aldolase OS=Mus musculus OX=10090 GN=Dera PE=1 SV=1
Q64133	AOFA_MOUSE	12.74	4	4	23.5754	21.717	22.4409	21.7193	59602	Oxidation (M)	Amine oxidase [flavin-containing] A OS=Mus musculus OX=10090 GN=Maoa PE=1 SV=3
P28660	NCKP1_MOUSE	10.02	8	8	22.5655	20.8647	22.2761	21.7333	128784	Oxidation (M)	Nck-associated protein 1 OS=Mus musculus OX=10090 GN=Nckap1 PE=1 SV=2
O88811	STAM2_MOUSE	7.46	2	2	21.0315	18.5469	20.4305	19.5075	57455		Signal transducing adapter molecule 2 OS=Mus musculus OX=10090 GN=Stam2 PE=1 SV=1
Q6ZQL4	WDR43_MOUSE	3.25	2	2	22.1156	19.899	21.1616	20.889	75381		WD repeat-containing protein 43 OS=Mus musculus OX=10090 GN=Wdr43 PE=1 SV=2
Q3UGC7	EI3JA_MOUSE	39.46	7	7	24.0275	23.6209	22.8621	23.5869	29344	Acetylation (N-term);Oxidation (M)	Eukaryotic translation initiation factor 3 subunit J-A OS=Mus musculus OX=10090 GN=Eif3j1 PE=2 SV=1
Q99MN1	SYK_MOUSE	20.17	10	10	26.5433	25.065	25.8385	25.0567	67840	Oxidation (M)	Lysine--tRNA ligase OS=Mus musculus OX=10090 GN=Kars1 PE=1 SV=1
Q61398	PCOC1_MOUSE	21.37	7	7	23.3101	22.7862	22.7859	23.0948	50168	Oxidation (M)	Procollagen C-endopeptidase enhancer 1 OS=Mus musculus OX=10090 GN=Pcolce PE=1 SV=2
O88622	PARG_MOUSE	3.2	2	2	19.1445	18.4533	18.9647	18.6978	109324	Oxidation (M)	Poly(ADP-ribose) glycohydrolase OS=Mus musculus OX=10090 GN=Parg PE=1 SV=2
Q61704	ITIH3_MOUSE	2.14	2	2	22.0972	21.7594	20.3614	21.9377	99358		Inter-alpha-trypsin inhibitor heavy chain H3 OS=Mus musculus OX=10090 GN=Itih3 PE=1 SV=3
Q8R3H9	TTC4_MOUSE	8.03	2	2	21.0529	19.2582	20.4031	19.6285	44339		Tetratricopeptide repeat protein 4 OS=Mus musculus OX=10090 GN=Ttc4 PE=1 SV=1
Q9DAW6	PRP4_MOUSE	3.07	1	1	22.0475	20.6991	21.2739	20.7622	58370		U4/U6 small nuclear ribonucleoprotein Prp4 OS=Mus musculus OX=10090 GN=Prpf4 PE=1 SV=1
Q91W96	APC4_MOUSE	6.57	4	4	21.8412	20.1497	21.4027	20.8051	91708	Oxidation (M)	Anaphase-promoting complex subunit 4 OS=Mus musculus OX=10090 GN=Anapc4 PE=1 SV=1
Q9CPN8	IF2B3_MOUSE	6.04	3	2	20.9907	19.09	19.9666	18.1593	63575		Insulin-like growth factor 2 mRNA-binding protein 3 OS=Mus musculus OX=10090 GN=Igf2bp3 PE=1 SV=1
P54103	DNJC2_MOUSE	11.27	5	5	22.5064	20.8307	21.1482	20.8609	71722		DnaJ homolog subfamily C member 2 OS=Mus musculus OX=10090 GN=Dnajc2 PE=1 SV=2
Q920A5	RISC_MOUSE	5.31	2	2	20.763	23.3239	19.9572	21.3015	50965	Oxidation (M)	Retinoid-inducible serine carboxypeptidase OS=Mus musculus OX=10090 GN=Scpep1 PE=1 SV=2
P60710	ACTB_MOUSE	7.47	32	4	29.6578	28.4354	28.7517	28.5165	41737	Acetylation (N-term);NBF;Oxidation (M)	Actin, cytoplasmic 1 OS=Mus musculus OX=10090 GN=Actb PE=1 SV=1
Q9CQE8	RTRAF_MOUSE	13.93	3	3	21.9566	21.534	21.1886	21.7473	28152	Oxidation (M)	RNA transcription, translation and transport factor protein OS=Mus musculus OX=10090 GN=RTRAF PE=1 SV=1
Q9R118	HTRA1_MOUSE	2.71	1	1	21.4274	18.5432	NaN	18.3418	51214		Serine protease HTRA1 OS=Mus musculus OX=10090 GN=Htra1 PE=1 SV=2
Q99LI7	CSTF3_MOUSE	9.76	5	5	22.2916	20.9548	21.4963	24.5285	82877	Acetylation (N-term)	Cleavage stimulation factor subunit 3 OS=Mus musculus OX=10090 GN=Cstf3 PE=1 SV=1
Q91YK2	RRP1B_MOUSE	6.35	3	3	23.1541	21.8266	22.2368	22.1113	80582	Acetylation (N-term);Oxidation (M)	Ribosomal RNA processing protein 1 homolog B OS=Mus musculus OX=10090 GN=Rrp1b PE=1 SV=2
Q8K0C9	GMDS_MOUSE	5.11	1	1	19.1738	NaN	19.3782	15.1287	41985		GDP-mannose 4,6 dehydratase OS=Mus musculus OX=10090 GN=Gmds PE=1 SV=1
Q61187	TS101_MOUSE	9.97	3	3	22.9999	22.1389	22.0887	20.8019	44124		Tumor susceptibility gene 101 protein OS=Mus musculus OX=10090 GN=Tsg101 PE=1 SV=2
Q61249	IGBP1_MOUSE	11.47	3	3	22.561	21.6036	21.9655	21.6384	38971	Acetylation (N-term);Oxidation (M)	Immunoglobulin-binding protein 1 OS=Mus musculus OX=10090 GN=Igbp1 PE=1 SV=1
Q60973	RBBP7_MOUSE	20	10	5	24.989	24.7645	24.9361	24.7182	47790	Oxidation (M)	Histone-binding protein RBBP7 OS=Mus musculus OX=10090 GN=Rbbp7 PE=1 SV=1
Q9CZY3	UB2V1_MOUSE	34.01	4	4	24.2096	23.0802	23.8385	23.5404	16355	Oxidation (M)	Ubiquitin-conjugating enzyme E2 variant 1 OS=Mus musculus OX=10090 GN=Ube2v1 PE=1 SV=1
P54731	FAF1_MOUSE	5.08	2	2	20.8581	20.283	20.8995	20.4636	73863	Oxidation (M)	FAS-associated factor 1 OS=Mus musculus OX=10090 GN=Faf1 PE=1 SV=2
Q8BJ71	NUP93_MOUSE	15.14	10	10	23.976	22.6013	23.082	23.3645	93281	Oxidation (M)	Nuclear pore complex protein Nup93 OS=Mus musculus OX=10090 GN=Nup93 PE=1 SV=1
P14901	HMOX1_MOUSE	38.41	7	7	22.9482	22.3254	22.7296	22.7848	32929	Acetylation (N-term);Oxidation (M)	Heme oxygenase 1 OS=Mus musculus OX=10090 GN=Hmox1 PE=1 SV=1
Q61035	HARS1_MOUSE	22	7	7	23.9584	22.7779	23.654	22.9482	57432	Oxidation (M)	Histidine--tRNA ligase, cytoplasmic OS=Mus musculus OX=10090 GN=Hars1 PE=1 SV=2
Q9Z110	P5CS_MOUSE	30.44	17	17	24.7745	23.7492	24.5105	24.0609	87266	Oxidation (M)	Delta-1-pyrroline-5-carboxylate synthase OS=Mus musculus OX=10090 GN=Aldh18a1 PE=1 SV=2
Q61703	ITIH2_MOUSE	3.91	3	3	24.6264	23.3101	23.6649	25.8576	105928		Inter-alpha-trypsin inhibitor heavy chain H2 OS=Mus musculus OX=10090 GN=Itih2 PE=1 SV=1
Q8C547	HTR5B_MOUSE	0.68	1	1	15.2228	NaN	16.9133	15.4689	224319		HEAT repeat-containing protein 5B OS=Mus musculus OX=10090 GN=Heatr5b PE=1 SV=3
P14115	RL27A_MOUSE	19.59	3	3	26.9088	25.7492	26.4186	26.4122	16605		60S ribosomal protein L27a OS=Mus musculus OX=10090 GN=Rpl27a PE=1 SV=5
Q9JKR6	HYOU1_MOUSE	21.82	15	15	23.9316	23.083	23.1418	23.1727	111181	Oxidation (M)	Hypoxia up-regulated protein 1 OS=Mus musculus OX=10090 GN=Hyou1 PE=1 SV=1
Q9DAW9	CNN3_MOUSE	38.48	10	9	25.317	24.5165	24.9847	24.6811	36429	Oxidation (M)	Calponin-3 OS=Mus musculus OX=10090 GN=Cnn3 PE=1 SV=1
P50516	VATA_MOUSE	14.91	6	6	22.1238	21.4225	21.9969	20.0724	68326	Oxidation (M)	V-type proton ATPase catalytic subunit A OS=Mus musculus OX=10090 GN=Atp6v1a PE=1 SV=2
P26041	MOES_MOUSE	33.62	29	19	26.726	26.632	26.5255	26.7389	67767	NBF;Oxidation (M)	Moesin OS=Mus musculus OX=10090 GN=Msn PE=1 SV=3
Q8R060	ZWILC_MOUSE	5.77	3	3	21.5315	20.7112	21.0106	20.6046	66839		Protein zwilch homolog OS=Mus musculus OX=10090 GN=Zwilch PE=1 SV=1
P33215	NEDD1_MOUSE	3.18	1	1	19.0508	16.368	16.1892	NaN	71292		Protein NEDD1 OS=Mus musculus OX=10090 GN=Nedd1 PE=1 SV=2
Q9JIF7	COPB_MOUSE	21.72	16	16	26.8142	24.8764	25.2463	25.2821	107066	Oxidation (M)	Coatomer subunit beta OS=Mus musculus OX=10090 GN=Copb1 PE=1 SV=1
O88532	ZFR_MOUSE	6.15	5	5	21.8105	20.914	21.5508	20.5656	116859		Zinc finger RNA-binding protein OS=Mus musculus OX=10090 GN=Zfr PE=1 SV=2
Q8CD91	SMOC2_MOUSE	10.29	3	3	26.1527	25.4923	25.3273	25.2856	49891		SPARC-related modular calcium-binding protein 2 OS=Mus musculus OX=10090 GN=Smoc2 PE=1 SV=1
Q5XJY5	COPD_MOUSE	27.4	11	11	24.1946	22.4157	23.7594	23.3239	57229	Oxidation (M)	Coatomer subunit delta OS=Mus musculus OX=10090 GN=Arcn1 PE=1 SV=2
Q91YE6	IPO9_MOUSE	15.66	12	12	25.1565	23.7895	24.5045	23.8858	116052	Acetylation (N-term);Oxidation (M)	Importin-9 OS=Mus musculus OX=10090 GN=Ipo9 PE=1 SV=3
P84096	RHOG_MOUSE	9.95	1	1	21.0286	19.3558	19.9675	19.6491	21308		Rho-related GTP-binding protein RhoG OS=Mus musculus OX=10090 GN=Rhog PE=1 SV=1
P62743	AP2S1_MOUSE	16.2	2	2	21.3726	20.4073	20.9604	21.1019	17018	Oxidation (M)	AP-2 complex subunit sigma OS=Mus musculus OX=10090 GN=Ap2s1 PE=1 SV=1
Q9QXB9	DRG2_MOUSE	31.04	8	8	24.5812	22.8898	24.2535	23.2961	40718	NBF;Oxidation (M)	Developmentally-regulated GTP-binding protein 2 OS=Mus musculus OX=10090 GN=Drg2 PE=1 SV=1
P39876	TIMP3_MOUSE	13.74	3	3	25.7208	24.7024	24.8904	25.0317	24182		Metalloproteinase inhibitor 3 OS=Mus musculus OX=10090 GN=Timp3 PE=1 SV=1
Q01768	NDKB_MOUSE	28.29	5	3	26.3031	25.6703	26.143	26.1273	17363	Oxidation (M)	Nucleoside diphosphate kinase B OS=Mus musculus OX=10090 GN=Nme2 PE=1 SV=1
Q9Z103	ADNP_MOUSE	4.42	4	4	23.2961	23.2487	22.8631	23.6865	124308	Acetylation (N-term);Oxidation (M)	Activity-dependent neuroprotector homeobox protein OS=Mus musculus OX=10090 GN=Adnp PE=1 SV=2
Q9CR16	PPID_MOUSE	29.73	11	11	25.6811	24.6209	25.2317	24.9225	40743	Oxidation (M)	Peptidyl-prolyl cis-trans isomerase D OS=Mus musculus OX=10090 GN=Ppid PE=1 SV=3
Q922J3	CLIP1_MOUSE	0.93	1	1	20.8094	18.8604	17.8935	19.0948	155814		CAP-Gly domain-containing linker protein 1 OS=Mus musculus OX=10090 GN=Clip1 PE=1 SV=1
Q8CGK3	LONM_MOUSE	13.38	9	9	22.7835	22.0198	21.9225	22.1174	105843	Oxidation (M)	Lon protease homolog, mitochondrial OS=Mus musculus OX=10090 GN=Lonp1 PE=1 SV=2
Q9D051	ODPB_MOUSE	33.98	8	8	23.9406	23.0933	23.7695	22.3532	38937	Oxidation (M)	Pyruvate dehydrogenase E1 component subunit beta, mitochondrial OS=Mus musculus OX=10090 GN=Pdhb PE=1 SV=1
E9Q912	GDS1_MOUSE	22.9	10	10	24.4984	23.0826	23.9933	23.2445	66076	Oxidation (M)	Rap1 GTPase-GDP dissociation stimulator 1 OS=Mus musculus OX=10090 GN=Rap1gds1 PE=2 SV=1
Q8K1E0	STX5_MOUSE	7.04	1	1	18.6369	16.7779	18.1588	14.4433	39713		Syntaxin-5 OS=Mus musculus OX=10090 GN=Stx5 PE=1 SV=3
Q9ER41	TOR1B_MOUSE	6.25	1	1	23.5638	20.1648	20.2572	19.925	37818	Oxidation (M)	Torsin-1B OS=Mus musculus OX=10090 GN=Tor1b PE=1 SV=2
P53811	PIPNB_MOUSE	14.02	4	3	24.002	22.9168	23.9933	23.1826	31487	Oxidation (M)	Phosphatidylinositol transfer protein beta isoform OS=Mus musculus OX=10090 GN=Pitpnb PE=1 SV=2
Q07113	MPRI_MOUSE	4.27	9	9	23.2505	22.6744	22.7492	22.6966	273815	Oxidation (M)	Cation-independent mannose-6-phosphate receptor OS=Mus musculus OX=10090 GN=Igf2r PE=1 SV=1
Q8R050	ERF3A_MOUSE	22.96	12	12	25.2133	24.0609	24.5638	24.141	68625	Oxidation (M)	Eukaryotic peptide chain release factor GTP-binding subunit ERF3A OS=Mus musculus OX=10090 GN=Gspt1 PE=1 SV=2
Q60875	ARHG2_MOUSE	6.5	4	4	21.8691	19.1723	21.6635	19.3004	111974	Oxidation (M)	Rho guanine nucleotide exchange factor 2 OS=Mus musculus OX=10090 GN=Arhgef2 PE=1 SV=4
P02104	HBE_MOUSE	6.8	1	1	25.9248	24.4923	24.9271	24.7895	16137		Hemoglobin subunit epsilon-Y2 OS=Mus musculus OX=10090 GN=Hbb-y PE=1 SV=2
P84099	RL19_MOUSE	26.02	6	6	27.341	26.8385	27.2979	27.632	23466	Oxidation (M)	60S ribosomal protein L19 OS=Mus musculus OX=10090 GN=Rpl19 PE=1 SV=1
Q3ULW8	PARP3_MOUSE	5.07	2	2	22.099	21.0079	21.9865	21.3855	59949		Protein mono-ADP-ribosyltransferase PARP3 OS=Mus musculus OX=10090 GN=Parp3 PE=2 SV=1
Q7TPR4	ACTN1_MOUSE	39.13	43	25	27.3745	26.5898	26.976	26.6458	103068	Acetylation (N-term);NBF;Oxidation (M)	Alpha-actinin-1 OS=Mus musculus OX=10090 GN=Actn1 PE=1 SV=1
P17809	GTR1_MOUSE	3.05	1	1	21.5356	20.478	21.205	21.456	53985		Solute carrier family 2, facilitated glucose transporter member 1 OS=Mus musculus OX=10090 GN=Slc2a1 PE=1 SV=4
Q8R2M2	TDIF2_MOUSE	5.01	3	3	21.2428	20.2226	20.3635	19.5684	84277		Deoxynucleotidyltransferase terminal-interacting protein 2 OS=Mus musculus OX=10090 GN=Dnttip2 PE=1 SV=1
P57716	NICA_MOUSE	3.81	2	2	18.1725	18.8082	18.0284	19.8222	78492		Nicastrin OS=Mus musculus OX=10090 GN=Ncstn PE=1 SV=3
Q924M7	MPI_MOUSE	12.53	3	3	22.4187	20.5993	22.1146	20.8779	46575	Oxidation (M)	Mannose-6-phosphate isomerase OS=Mus musculus OX=10090 GN=Mpi PE=1 SV=1
Q9D0N7	CAF1B_MOUSE	1.92	1	1	19.8348	18.897	19.0952	19.1603	63132		Chromatin assembly factor 1 subunit B OS=Mus musculus OX=10090 GN=Chaf1b PE=1 SV=1
Q6IFX2	K1C42_MOUSE	11.06	10	4	22.4209	22.7571	23.2115	22.0705	50133	Oxidation (M)	Keratin, type I cytoskeletal 42 OS=Mus musculus OX=10090 GN=Krt42 PE=1 SV=1
P53996	CNBP_MOUSE	8.43	1	1	20.573	17.953	20.387	19.3529	19592	NBF	Cellular nucleic acid-binding protein OS=Mus musculus OX=10090 GN=Cnbp PE=1 SV=2
Q9R0E1	PLOD3_MOUSE	8.37	5	5	24.002	23.4923	23.632	23.7077	84922	Oxidation (M)	Multifunctional procollagen lysine hydroxylase and glycosyltransferase LH3 OS=Mus musculus OX=10090 GN=Plod3 PE=1 SV=1
Q9WVA3	BUB3_MOUSE	23.31	6	6	24.8576	23.8764	24.4488	24.019	36955	Oxidation (M)	Mitotic checkpoint protein BUB3 OS=Mus musculus OX=10090 GN=Bub3 PE=1 SV=2
P62821	RAB1A_MOUSE	23.9	5	3	24.8142	22.8658	24.3975	23.7182	22678	Acetylation (N-term);Oxidation (M)	Ras-related protein Rab-1A OS=Mus musculus OX=10090 GN=Rab1A PE=1 SV=3
Q61749	EI2BD_MOUSE	14.12	5	5	22.6537	20.6226	21.7696	21.1097	57624		Translation initiation factor eIF-2B subunit delta OS=Mus musculus OX=10090 GN=Eif2b4 PE=1 SV=2
P56546	CTBP2_MOUSE	4.72	3	2	21.7098	20.7423	20.9761	20.2963	48957		C-terminal-binding protein 2 OS=Mus musculus OX=10090 GN=Ctbp2 PE=1 SV=2
P62717	RL18A_MOUSE	11.93	2	2	22.4832	21.1688	21.383	21.5561	20732	NBF;Oxidation (M)	60S ribosomal protein L18a OS=Mus musculus OX=10090 GN=Rpl18a PE=1 SV=1
Q5FWK3	RHG01_MOUSE	8.66	3	3	21.9106	21.1592	21.2281	21.4279	50411		Rho GTPase-activating protein 1 OS=Mus musculus OX=10090 GN=Arhgap1 PE=1 SV=1
O35326	SRSF5_MOUSE	14.87	4	3	22.6681	21.1068	22.2068	21.7382	30891		Serine/arginine-rich splicing factor 5 OS=Mus musculus OX=10090 GN=Srsf5 PE=1 SV=2
Q8BTW3	EXOS6_MOUSE	29.3	6	6	22.0217	18.4292	21.595	19.2722	28370		Exosome complex component MTR3 OS=Mus musculus OX=10090 GN=Exosc6 PE=1 SV=1
P42669	PURA_MOUSE	26.79	4	4	23.8191	21.1876	23.0688	21.7526	34884		Transcriptional activator protein Pur-alpha OS=Mus musculus OX=10090 GN=Pura PE=1 SV=1
Q04750	TOP1_MOUSE	15.38	10	10	26.2372	24.7234	24.239	24.6431	90876	Acetylation (N-term);Oxidation (M)	DNA topoisomerase 1 OS=Mus musculus OX=10090 GN=Top1 PE=1 SV=2
Q9QY76	VAPB_MOUSE	11.52	3	2	20.8545	20.4903	21.2455	20.7665	26946	Oxidation (M)	Vesicle-associated membrane protein-associated protein B OS=Mus musculus OX=10090 GN=Vapb PE=1 SV=3
Q8CCS6	PABP2_MOUSE	23.84	3	3	24.2317	23.1501	23.2821	23.391	32297	Acetylation (N-term)	Polyadenylate-binding protein 2 OS=Mus musculus OX=10090 GN=Pabpn1 PE=1 SV=3
O35593	PSDE_MOUSE	35.81	5	5	24.3578	23.2961	24.1565	23.8288	34577	Oxidation (M)	26S proteasome non-ATPase regulatory subunit 14 OS=Mus musculus OX=10090 GN=Psmd14 PE=1 SV=2
Q9QWL7	K1C17_MOUSE	4.85	10	1	19.5334	17.3086	NaN	20.4519	48162	Oxidation (M)	Keratin, type I cytoskeletal 17 OS=Mus musculus OX=10090 GN=Krt17 PE=1 SV=3
Q9JIG8	PRAF2_MOUSE	22.47	3	3	23.3101	22.082	22.7769	22.4053	19478	Oxidation (M)	PRA1 family protein 2 OS=Mus musculus OX=10090 GN=Praf2 PE=1 SV=1
P70296	PEBP1_MOUSE	58.29	6	6	27.5682	26.5898	27.0505	26.217	20830	Acetylation (N-term);NBF;Oxidation (M)	Phosphatidylethanolamine-binding protein 1 OS=Mus musculus OX=10090 GN=Pebp1 PE=1 SV=3
Q91WK5	GCSH_MOUSE	11.76	1	1	18.4054	20.1293	18.6575	19.5604	18637	Oxidation (M)	Glycine cleavage system H protein, mitochondrial OS=Mus musculus OX=10090 GN=Gcsh PE=1 SV=2
Q8C0L0	TMX4_MOUSE	5.37	1	1	18.1529	17.768	18.4805	18.3757	37131		Thioredoxin-related transmembrane protein 4 OS=Mus musculus OX=10090 GN=Tmx4 PE=1 SV=2
Q8BVY0	RL1D1_MOUSE	32.96	12	12	25.1332	23.5285	24.1946	24.141	50421	NBF;Oxidation (M)	Ribosomal L1 domain-containing protein 1 OS=Mus musculus OX=10090 GN=Rsl1d1 PE=1 SV=1
Q8VDF2	UHRF1_MOUSE	1.66	1	1	22.3541	20.3517	21.5455	20.3523	88304		E3 ubiquitin-protein ligase UHRF1 OS=Mus musculus OX=10090 GN=Uhrf1 PE=1 SV=2
Q8BY87	UBP47_MOUSE	8.94	9	9	23.1249	21.5038	21.9947	21.6484	157455	Oxidation (M)	Ubiquitin carboxyl-terminal hydrolase 47 OS=Mus musculus OX=10090 GN=Usp47 PE=1 SV=2
Q9CY64	BIEA_MOUSE	18.64	4	4	22.6345	21.8566	21.9536	21.9326	33525	Oxidation (M)	Biliverdin reductase A OS=Mus musculus OX=10090 GN=Blvra PE=1 SV=1
Q8C650	SEP10_MOUSE	2.65	1	1	19.712	18.1864	19.2967	18.7888	52422		Septin-10 OS=Mus musculus OX=10090 GN=Septin10 PE=1 SV=1
Q9D7N3	RT09_MOUSE	3.85	1	1	17.3552	16.0335	16.625	NaN	44929		28S ribosomal protein S9, mitochondrial OS=Mus musculus OX=10090 GN=Mrps9 PE=1 SV=3
Q689Z5	SBNO1_MOUSE	4.39	3	3	19.9871	17.4199	18.4479	17.4759	153738	Oxidation (M)	Protein strawberry notch homolog 1 OS=Mus musculus OX=10090 GN=Sbno1 PE=1 SV=2
P27048	RSMB_MOUSE	6.49	1	1	21.1847	19.4853	21.5028	20.9159	23656	Oxidation (M)	Small nuclear ribonucleoprotein-associated protein B OS=Mus musculus OX=10090 GN=Snrpb PE=1 SV=1
Q9R0N0	GALK1_MOUSE	13.52	4	4	23.2961	21.4662	22.886	22.4646	42295	Oxidation (M)	Galactokinase OS=Mus musculus OX=10090 GN=Galk1 PE=1 SV=2
Q6P9J9	ANO6_MOUSE	1.32	1	1	18.945	18.7086	19.023	18.9778	106255		Anoctamin-6 OS=Mus musculus OX=10090 GN=Ano6 PE=1 SV=1
Q9D162	CC167_MOUSE	15.46	1	1	19.6623	NaN	19.8864	19.7317	11475		Coiled-coil domain-containing protein 167 OS=Mus musculus OX=10090 GN=Ccdc167 PE=1 SV=2
Q8BGZ4	CDC23_MOUSE	11.89	5	5	24.0359	20.3619	23.5165	20.6466	68562		Cell division cycle protein 23 homolog OS=Mus musculus OX=10090 GN=Cdc23 PE=1 SV=2
Q6NXH9	K2C73_MOUSE	4.27	4	2	20.6718	19.3043	21.6168	21.5919	58911		Keratin, type II cytoskeletal 73 OS=Mus musculus OX=10090 GN=Krt73 PE=1 SV=1
Q9R112	SQOR_MOUSE	6.22	2	2	20.901	19.5896	20.3019	19.8042	50282		Sulfide:quinone oxidoreductase, mitochondrial OS=Mus musculus OX=10090 GN=Sqor PE=1 SV=3
P32921	SYWC_MOUSE	20.17	7	7	24.2535	23.7995	23.8093	23.5522	54358	Oxidation (M)	Tryptophan--tRNA ligase, cytoplasmic OS=Mus musculus OX=10090 GN=Wars1 PE=1 SV=2
Q9JJK2	LANC2_MOUSE	18	5	5	22.0864	22.9107	21.0879	21.2921	50777	Oxidation (M)	LanC-like protein 2 OS=Mus musculus OX=10090 GN=Lancl2 PE=1 SV=1
Q9DBR7	MYPT1_MOUSE	5.83	3	3	21.7541	20.2622	21.2489	21.3852	114996		Protein phosphatase 1 regulatory subunit 12A OS=Mus musculus OX=10090 GN=Ppp1r12a PE=1 SV=2
Q3URQ0	TEX10_MOUSE	3.56	2	2	22.9493	21.7635	22.5723	20.4305	105209		Testis-expressed protein 10 OS=Mus musculus OX=10090 GN=Tex10 PE=1 SV=1
Q61699	HS105_MOUSE	31	17	17	26.632	24.2317	24.9316	24.1095	96407	NBF;Oxidation (M)	Heat shock protein 105 kDa OS=Mus musculus OX=10090 GN=Hsph1 PE=1 SV=2
Q922H9	ZN330_MOUSE	4.43	1	1	21.0235	19.4548	20.5701	19.8001	35608		Zinc finger protein 330 OS=Mus musculus OX=10090 GN=Znf330 PE=1 SV=1
Q9ER81	IFG15_MOUSE	10.69	1	1	19.5723	NaN	19.0163	17.3894	15278		Torsin-1A-interacting protein 2, isoform IFRG15 OS=Mus musculus OX=10090 GN=Tor1aip2 PE=1 SV=1
Q80UY1	CARME_MOUSE	3	1	1	19.5076	18.6154	18.8907	18.1533	46339		Carnosine N-methyltransferase OS=Mus musculus OX=10090 GN=Carnmt1 PE=1 SV=1
Q80X82	SYMPK_MOUSE	3.11	2	2	19.9958	18.1522	17.9895	18.8554	142620	Oxidation (M)	Symplekin OS=Mus musculus OX=10090 GN=Sympk PE=1 SV=2
Q8C2E7	WASC5_MOUSE	0.95	1	1	18.9741	16.9667	17.2657	16.8691	134110		WASH complex subunit 5 OS=Mus musculus OX=10090 GN=Washc5 PE=1 SV=2
Q8JZU2	TXTP_MOUSE	3.86	1	1	20.352	18.1325	19.4923	18.7084	33931		Tricarboxylate transport protein, mitochondrial OS=Mus musculus OX=10090 GN=Slc25a1 PE=1 SV=1
Q9JJ89	CCD86_MOUSE	6.34	2	2	21.8801	19.4908	21.066	20.1806	46487		Coiled-coil domain-containing protein 86 OS=Mus musculus OX=10090 GN=Ccdc86 PE=1 SV=2
P28740	KIF2A_MOUSE	2.27	1	1	19.3435	17.6921	19.3738	17.5008	79756	Oxidation (M)	Kinesin-like protein KIF2A OS=Mus musculus OX=10090 GN=Kif2a PE=1 SV=2
Q8BMK4	CKAP4_MOUSE	35.3	17	17	24.7846	24.391	23.6865	24.275	63692	Oxidation (M)	Cytoskeleton-associated protein 4 OS=Mus musculus OX=10090 GN=Ckap4 PE=1 SV=2
O35566	CD151_MOUSE	5.93	1	1	17.577	16.5008	NaN	17.0703	28246		CD151 antigen OS=Mus musculus OX=10090 GN=Cd151 PE=1 SV=2
Q6P5E4	UGGG1_MOUSE	19.92	22	22	23.4425	22.8704	22.9485	24.1565	176434	Oxidation (M)	UDP-glucose:glycoprotein glucosyltransferase 1 OS=Mus musculus OX=10090 GN=Uggt1 PE=1 SV=4
P35980	RL18_MOUSE	29.79	5	5	29.0322	27.8142	28.4113	28.8264	21645		60S ribosomal protein L18 OS=Mus musculus OX=10090 GN=Rpl18 PE=1 SV=3
O89050	MKLN1_MOUSE	7.76	3	3	21.5804	NaN	19.9953	20.2126	84878	Oxidation (M)	Muskelin OS=Mus musculus OX=10090 GN=Mkln1 PE=1 SV=1
A2AWA9	RBGP1_MOUSE	1.22	1	1	19.0576	14.6042	17.4787	17.4915	120798		Rab GTPase-activating protein 1 OS=Mus musculus OX=10090 GN=Rabgap1 PE=1 SV=1
Q3UHD6	SNX27_MOUSE	4.64	2	2	21.5853	20.5798	21.6717	20.6735	60989		Sorting nexin-27 OS=Mus musculus OX=10090 GN=Snx27 PE=1 SV=2
O55222	ILK_MOUSE	11.95	4	4	23.7895	22.956	23.417	23.0008	51373	Oxidation (M)	Integrin-linked protein kinase OS=Mus musculus OX=10090 GN=Ilk PE=1 SV=2
Q9JHK4	PGTA_MOUSE	6.35	2	2	20.7876	17.729	20.0856	18.8586	64989	Oxidation (M)	Geranylgeranyl transferase type-2 subunit alpha OS=Mus musculus OX=10090 GN=Rabggta PE=1 SV=1
P07744	K2C4_MOUSE	6.86	5	2	20.3251	18.8798	20.0975	19.746	56283	Acetylation (N-term);Oxidation (M)	Keratin, type II cytoskeletal 4 OS=Mus musculus OX=10090 GN=Krt4 PE=1 SV=2
Q99LR1	ABD12_MOUSE	4.27	1	1	19.872	18.3787	18.3702	17.9437	45270		Lysophosphatidylserine lipase ABHD12 OS=Mus musculus OX=10090 GN=Abhd12 PE=1 SV=2
Q61897	KT33B_MOUSE	2.23	2	1	18.9037	21.0937	17.9945	NaN	45864		Keratin, type I cuticular Ha3-II OS=Mus musculus OX=10090 GN=Krt33b PE=1 SV=2
A2AN08	UBR4_MOUSE	5.29	18	18	23.4298	21.7214	23.116	21.7359	572290	Oxidation (M)	E3 ubiquitin-protein ligase UBR4 OS=Mus musculus OX=10090 GN=Ubr4 PE=1 SV=1
P55264	ADK_MOUSE	20.5	5	5	24.3239	23.092	23.895	23.3101	40149	Oxidation (M)	Adenosine kinase OS=Mus musculus OX=10090 GN=Adk PE=1 SV=2
Q9QZE7	TSNAX_MOUSE	10.34	2	2	17.0065	19.1932	NaN	18.4903	32926	Oxidation (M)	Translin-associated protein X OS=Mus musculus OX=10090 GN=Tsnax PE=1 SV=1
O35887	CALU_MOUSE	39.37	8	8	22.8251	23.2821	21.5101	23.0887	37064	Oxidation (M)	Calumenin OS=Mus musculus OX=10090 GN=Calu PE=1 SV=1
P62702	RS4X_MOUSE	46.01	13	13	28.2847	26.317	27.976	26.8385	29598	NBF;Oxidation (M)	40S ribosomal protein S4, X isoform OS=Mus musculus OX=10090 GN=Rps4x PE=1 SV=2
Q9CQ60	6PGL_MOUSE	35.8	6	6	22.5372	20.9852	22.171	21.6925	27254		6-phosphogluconolactonase OS=Mus musculus OX=10090 GN=Pgls PE=1 SV=1
P47738	ALDH2_MOUSE	41.62	16	16	25.8623	23.7895	24.8191	23.9406	56538	Oxidation (M)	Aldehyde dehydrogenase, mitochondrial OS=Mus musculus OX=10090 GN=Aldh2 PE=1 SV=1
Q08091	CNN1_MOUSE	21.55	5	5	22.8816	22.3132	22.6284	22.1137	33356	Oxidation (M)	Calponin-1 OS=Mus musculus OX=10090 GN=Cnn1 PE=1 SV=1
P17426	AP2A1_MOUSE	11.36	11	7	24.7745	23.0995	24.2021	23.5165	107664	NBF;Oxidation (M)	AP-2 complex subunit alpha-1 OS=Mus musculus OX=10090 GN=Ap2a1 PE=1 SV=1
P97287	MCL1_MOUSE	6.34	1	1	19.7206	18.5938	19.8413	19.162	35217		Induced myeloid leukemia cell differentiation protein Mcl-1 homolog OS=Mus musculus OX=10090 GN=Mcl1 PE=1 SV=3
Q80U70	SUZ12_MOUSE	1.62	1	1	22.4149	21.4472	19.6673	19.9641	83026		Polycomb protein Suz12 OS=Mus musculus OX=10090 GN=Suz12 PE=1 SV=2
Q3UFM5	NOM1_MOUSE	1.29	1	1	19.9281	18.47	19.5496	18.5565	95960		Nucleolar MIF4G domain-containing protein 1 OS=Mus musculus OX=10090 GN=Nom1 PE=1 SV=2
Q8BKX1	BAIP2_MOUSE	2.43	1	1	19.2834	17.7321	18.6219	18.1018	59237		Brain-specific angiogenesis inhibitor 1-associated protein 2 OS=Mus musculus OX=10090 GN=Baiap2 PE=1 SV=2
Q9DBG3	AP2B1_MOUSE	18.89	20	12	24.5105	22.3118	23.5404	22.9017	104583	Oxidation (M)	AP-2 complex subunit beta OS=Mus musculus OX=10090 GN=Ap2b1 PE=1 SV=1
Q8K0V4	CNOT3_MOUSE	4.26	2	2	21.9086	20.3303	20.5319	20.4431	81946	Oxidation (M)	CCR4-NOT transcription complex subunit 3 OS=Mus musculus OX=10090 GN=Cnot3 PE=1 SV=1
A2AGT5	CKAP5_MOUSE	15.4	24	24	25.0148	22.6733	23.2001	22.778	225635	Oxidation (M)	Cytoskeleton-associated protein 5 OS=Mus musculus OX=10090 GN=Ckap5 PE=1 SV=1
Q8BT07	CEP55_MOUSE	2.81	1	1	17.9884	18.132	18.5975	17.695	53930	Oxidation (M)	Centrosomal protein of 55 kDa OS=Mus musculus OX=10090 GN=Cep55 PE=1 SV=2
Q6P9R2	OXSR1_MOUSE	11.39	4	4	22.7001	21.4021	21.367	20.9013	58214		Serine/threonine-protein kinase OSR1 OS=Mus musculus OX=10090 GN=Oxsr1 PE=1 SV=1
Q8BW10	NOB1_MOUSE	12.9	4	4	21.5722	20.6052	21.2637	20.7668	45464		RNA-binding protein NOB1 OS=Mus musculus OX=10090 GN=Nob1 PE=1 SV=1
P83741	WNK1_MOUSE	1.6	3	3	21.0962	20.172	20.5379	19.8249	250934		Serine/threonine-protein kinase WNK1 OS=Mus musculus OX=10090 GN=Wnk1 PE=1 SV=2
Q9D8S3	ARFG3_MOUSE	3.25	1	1	18.2712	NaN	18.0218	16.7827	57456		ADP-ribosylation factor GTPase-activating protein 3 OS=Mus musculus OX=10090 GN=Arfgap3 PE=1 SV=2
Q6PFD9	NUP98_MOUSE	10.52	13	13	24.5638	23.5522	24.1565	23.2821	197241	Oxidation (M)	Nuclear pore complex protein Nup98-Nup96 OS=Mus musculus OX=10090 GN=Nup98 PE=1 SV=2
P60670	NPL4_MOUSE	12.01	5	5	23.6096	21.3623	22.6909	22.0312	68017		Nuclear protein localization protein 4 homolog OS=Mus musculus OX=10090 GN=Nploc4 PE=1 SV=3
P10630	IF4A2_MOUSE	9.58	11	2	20.1144	19.6172	19.9497	19.4551	46402	NBF;Oxidation (M)	Eukaryotic initiation factor 4A-II OS=Mus musculus OX=10090 GN=Eif4a2 PE=1 SV=2
Q9ERD7	TBB3_MOUSE	3.78	12	1	25.6998	23.6431	25.0317	24.4923	50419		Tubulin beta-3 chain OS=Mus musculus OX=10090 GN=Tubb3 PE=1 SV=1
Q9JME5	AP3B2_MOUSE	1.39	1	1	23.2273	22.3547	22.4507	22.5139	119193		AP-3 complex subunit beta-2 OS=Mus musculus OX=10090 GN=Ap3b2 PE=1 SV=2
Q80YS6	AFAP1_MOUSE	2.19	1	1	19.5744	18.4127	19.4383	18.2885	80615		Actin filament-associated protein 1 OS=Mus musculus OX=10090 GN=Afap1 PE=1 SV=1
P53995	APC1_MOUSE	5.35	7	7	22.1441	20.4766	21.1635	20.5786	215994	Oxidation (M)	Anaphase-promoting complex subunit 1 OS=Mus musculus OX=10090 GN=Anapc1 PE=1 SV=2
Q8BU04	UBR7_MOUSE	2.12	1	1	20.9198	19.5196	20.3675	20.3959	48065		Putative E3 ubiquitin-protein ligase UBR7 OS=Mus musculus OX=10090 GN=Ubr7 PE=1 SV=1
Q8CJF7	ELYS_MOUSE	2.36	4	4	20.8353	18.8494	20.3644	19.7769	247646		Protein ELYS OS=Mus musculus OX=10090 GN=Ahctf1 PE=1 SV=1
A2ADY9	DDI2_MOUSE	8.27	2	2	21.6339	19.977	21.257	20.4035	44591		Protein DDI1 homolog 2 OS=Mus musculus OX=10090 GN=Ddi2 PE=1 SV=1
Q99M87	DNJA3_MOUSE	5.83	2	2	21.7697	20.1323	20.8889	20.1533	52443		DnaJ homolog subfamily A member 3, mitochondrial OS=Mus musculus OX=10090 GN=Dnaja3 PE=1 SV=1
O08529	CAN2_MOUSE	29.43	15	15	25.0443	23.8576	24.5404	24.0935	79872	NBF;Oxidation (M)	Calpain-2 catalytic subunit OS=Mus musculus OX=10090 GN=Capn2 PE=1 SV=4
Q91ZJ5	UGPA_MOUSE	7.48	3	3	21.5529	20.795	20.6065	20.3467	56979		UTP--glucose-1-phosphate uridylyltransferase OS=Mus musculus OX=10090 GN=Ugp2 PE=1 SV=3
Q91VM9	IPYR2_MOUSE	3.94	1	1	19.8861	19.4189	20.1716	19.0652	38115	Oxidation (M)	Inorganic pyrophosphatase 2, mitochondrial OS=Mus musculus OX=10090 GN=Ppa2 PE=1 SV=1
Q00PI9	HNRL2_MOUSE	9.53	5	5	23.9672	22.2386	23.7077	22.9945	84940	Oxidation (M)	Heterogeneous nuclear ribonucleoprotein U-like protein 2 OS=Mus musculus OX=10090 GN=Hnrnpul2 PE=1 SV=2
Q3V1T4	P3H1_MOUSE	6.22	2	2	18.8557	20.2104	18.4955	20.5132	83651	Oxidation (M)	Prolyl 3-hydroxylase 1 OS=Mus musculus OX=10090 GN=P3h1 PE=1 SV=2
O70400	PDLI1_MOUSE	38.53	8	8	25.5841	24.4862	25.1681	24.7846	35774	Acetylation (N-term);Oxidation (M)	PDZ and LIM domain protein 1 OS=Mus musculus OX=10090 GN=Pdlim1 PE=1 SV=4
P28659	CELF1_MOUSE	4.53	3	3	23.0754	22.1626	23.0104	22.2344	52107	Oxidation (M)	CUGBP Elav-like family member 1 OS=Mus musculus OX=10090 GN=Celf1 PE=1 SV=2
P41230	KDM5C_MOUSE	1.99	2	2	20.104	NaN	17.802	15.608	175313		Lysine-specific demethylase 5C OS=Mus musculus OX=10090 GN=Kdm5c PE=1 SV=4
Q9Z315	SNUT1_MOUSE	9.55	5	5	22.1213	20.2992	20.208	20.5868	90885	Oxidation (M)	U4/U6.U5 tri-snRNP-associated protein 1 OS=Mus musculus OX=10090 GN=Sart1 PE=1 SV=1
Q63829	COMD3_MOUSE	15.9	2	2	21.1746	19.4853	20.4142	19.4406	22037		COMM domain-containing protein 3 OS=Mus musculus OX=10090 GN=Commd3 PE=1 SV=1
P35979	RL12_MOUSE	35.76	4	4	26.0711	23.976	25.4923	24.8093	17805	NBF	60S ribosomal protein L12 OS=Mus musculus OX=10090 GN=Rpl12 PE=1 SV=2
Q9D0D5	T2EA_MOUSE	14.55	4	4	21.691	18.8058	20.8762	19.9775	49593		General transcription factor IIE subunit 1 OS=Mus musculus OX=10090 GN=Gtf2e1 PE=1 SV=1
P97372	PSME2_MOUSE	15.9	2	2	23.0123	22.1443	22.8578	22.4723	27057	Oxidation (M)	Proteasome activator complex subunit 2 OS=Mus musculus OX=10090 GN=Psme2 PE=1 SV=4
A2APB8	TPX2_MOUSE	5.64	3	3	21.5295	20.4018	21.1124	20.8477	85894		Targeting protein for Xklp2 OS=Mus musculus OX=10090 GN=Tpx2 PE=1 SV=1
Q8CDM1	ATAD2_MOUSE	1.06	1	1	19.7898	18.5002	19.5831	18.0741	117943		ATPase family AAA domain-containing protein 2 OS=Mus musculus OX=10090 GN=Atad2 PE=1 SV=1
Q61191	HCFC1_MOUSE	4.89	7	7	22.3888	20.7379	21.662	21.2392	210437	Acetylation (N-term);Oxidation (M)	Host cell factor 1 OS=Mus musculus OX=10090 GN=Hcfc1 PE=1 SV=2
Q8BMC4	NOP9_MOUSE	7.39	3	3	22.0256	19.5633	21.3003	20.0737	70046		Nucleolar protein 9 OS=Mus musculus OX=10090 GN=Nop9 PE=1 SV=1
Q8BTZ4	APC5_MOUSE	4.05	2	2	19.4426	18.2596	18.8126	18.9896	83098	Oxidation (M)	Anaphase-promoting complex subunit 5 OS=Mus musculus OX=10090 GN=Anapc5 PE=1 SV=1
Q9D1M7	FKB11_MOUSE	4.98	1	1	20.9621	20.0691	20.0944	20.5231	22137		Peptidyl-prolyl cis-trans isomerase FKBP11 OS=Mus musculus OX=10090 GN=Fkbp11 PE=1 SV=1
Q9WVQ5	MTNB_MOUSE	7.05	1	1	19.9968	19.2307	20.1916	19.0008	26949	Oxidation (M)	Methylthioribulose-1-phosphate dehydratase OS=Mus musculus OX=10090 GN=Apip PE=1 SV=1
Q3U8K7	KMT5B_MOUSE	1.7	1	1	21.4859	20.6107	21.2007	21.0931	98580		Histone-lysine N-methyltransferase KMT5B OS=Mus musculus OX=10090 GN=Kmt5b PE=1 SV=2
Q99KQ4	NAMPT_MOUSE	28.72	9	9	22.9349	21.8138	22.3675	22.0843	55447	Acetylation (N-term);Oxidation (M)	Nicotinamide phosphoribosyltransferase OS=Mus musculus OX=10090 GN=Nampt PE=1 SV=1
Q60790	RASA3_MOUSE	8.51	4	4	20.8905	18.0353	19.0114	18.5769	95987		Ras GTPase-activating protein 3 OS=Mus musculus OX=10090 GN=Rasa3 PE=1 SV=2
Q8K1N4	SPAS2_MOUSE	2.75	1	1	19.9072	18.0745	18.3418	18.2186	58956		Spermatogenesis-associated serine-rich protein 2 OS=Mus musculus OX=10090 GN=Spats2 PE=1 SV=1
P33174	KIF4_MOUSE	5.2	4	4	21.936	20.4196	21.282	20.8037	139519	Oxidation (M)	Chromosome-associated kinesin KIF4 OS=Mus musculus OX=10090 GN=Kif4 PE=1 SV=3
Q9CWL8	CTBL1_MOUSE	5.15	2	2	21.1509	19.7755	20.929	18.6934	64980	Acetylation (N-term);Oxidation (M)	Beta-catenin-like protein 1 OS=Mus musculus OX=10090 GN=Ctnnbl1 PE=1 SV=1
P40336	VP26A_MOUSE	5.5	1	1	21.6565	20.9741	20.7073	21.0461	38114		Vacuolar protein sorting-associated protein 26A OS=Mus musculus OX=10090 GN=Vps26a PE=1 SV=1
Q9Z1Y4	TRIP6_MOUSE	16.67	4	4	23.0927	21.5347	22.8424	21.8011	50934	Acetylation (N-term);DCP	Thyroid receptor-interacting protein 6 OS=Mus musculus OX=10090 GN=Trip6 PE=1 SV=1
O35218	CPSF2_MOUSE	10.1	4	4	25.8694	26.8019	26.2188	26.7895	88383	Oxidation (M)	Cleavage and polyadenylation specificity factor subunit 2 OS=Mus musculus OX=10090 GN=Cpsf2 PE=1 SV=1
P02535	K1C10_MOUSE	11.93	9	6	26.1253	26.7517	25.9316	26.4314	57770	DCP	Keratin, type I cytoskeletal 10 OS=Mus musculus OX=10090 GN=Krt10 PE=1 SV=3
P62141	PP1B_MOUSE	17.74	8	4	24.8044	23.2275	24.3444	23.6431	37187	Acetylation (N-term);Oxidation (M)	Serine/threonine-protein phosphatase PP1-beta catalytic subunit OS=Mus musculus OX=10090 GN=Ppp1cb PE=1 SV=3
Q8BXZ1	TMX3_MOUSE	21.05	6	6	22.1781	21.5976	21.7298	22.0269	51848	Oxidation (M)	Protein disulfide-isomerase TMX3 OS=Mus musculus OX=10090 GN=Tmx3 PE=1 SV=2
P99026	PSB4_MOUSE	25.38	4	4	22.0622	21.5097	22.2181	22.2934	29116	Oxidation (M)	Proteasome subunit beta type-4 OS=Mus musculus OX=10090 GN=Psmb4 PE=1 SV=1
[truncated: 1,923 more rows]
