# Supplementary material for: Mining proteomes for zinc finger persulfidation
Source: Royal Society of Chemistry journal article supplement (doi:10.1039/d3cb00106g), 2024-01-01
Supplement: d3cb00106g4.xlsx [file d3cb00106g4.xlsx]

## Sheet: Human GO MF
Category	Term	Column1	%	PValue	Genes	List Total	Pop Hits	Pop Total	Fold Enrichment	Bonferroni	Benjamini	FDR	NegativeLog10
GOTERM_MF_DIRECT	GO:0046872~	Metal ion binding	55.8559	2.9086e-24	P21291, O95159, A0A3B3IUA7, Q8IWS0, Q96QC0, P52594, Q71UM5, Q96B54, P04637, P49023, Q9Y508, Q8WU90, Q8TDI0, Q9BRR0, Q01844, O60884, P84022, Q9NW08, P49736, A0A0D9SGE8, Q9H0H5, A8MUK0, P31689, Q14258, Q13642, P30876, Q9Y4X5, Q7Z5L9, A0A3B3IRU6, M0QXZ5, Q7LBC6, Q9H7Z6, H0YDG9, Q96S55, Q01954, Q7Z2W4, Q96JP5, F2Z2R5, P20042, H0YCN2, Q15796, P61513, Q5VZF2, Q6IQ21, P61927, Q14588, P27694, Q9GZU2, A8M…	111	2675	18908	3.94812	8.40585e-22	8.40585e-22	7.62052e-22	23.5363
GOTERM_MF_DIRECT	GO:0003723~	RNA binding	40.5405	5.2955e-21	P52597, P21291, A0A3B3IUA7, Q8IWS0, Q16629, Q7RTV0, P52594, Q96QC0, Q71UM5, Q12986, Q8WU90, Q01844, Q92973, Q7L2E3, P55072, P62633, Q15024, A0A0D9SGE8, A8MUK0, F8WEA1, Q14258, P30876, Q15428, A0A7I2V5F6, A0A7I2V5F1, P19338, Q7Z2W4, P68104, Q92841, P20042, A0A7I2V311, P61513, Q5VZF2, P61927, A0A7I2YQA8, A8MTP4, Q15637, F8W6K1, Q96KR1, Q99590, P13010, P09234, A0A7I2YQQ0, P09874, Q13263, P26358, P49…	111	1471	18908	5.21102	1.5304e-18	7.652e-19	6.93711e-19	20.2761
GOTERM_MF_DIRECT	GO:0008270~	Zinc ion binding	32.4324	2.03329e-20	O95159, P21291, Q16629, P29375, Q7RTV0, Q9UBF6, P04637, Q12986, P84022, H3BT57, P62633, Q92974, F8WEA1, Q9Y4X5, Q15428, A0A2R8YDE6, A0A7I2V5F6, P13631, A0A7I2V5F1, F8WEU8, A0A7I2V311, O75925, A0A7I2YQA8, Q15637, Q96KR1, A0A0A0MSW0, Q8IXK0, O95376, H7BZM7, H7BYG8, P09234, A0A7I2YQQ0, P09874, Q13263, Q9UNY4, P26358, Q13501, Q5T4S7, Q12933, C9JAB2, O15231, D6RAT4, Q14839, A0A7I2V5D0, P42677, A0A7I2V…	111	875	18908	7.00837	5.87621e-18	1.95874e-18	1.77574e-18	19.6918
GOTERM_MF_DIRECT	GO:0003677~	DNA binding	31.5315	7.3664e-14	O95159, O75925, Q8IWS0, P27694, P29375, Q7RTV0, A0A7I2YQA8, P52594, Q96QC0, Q969J2, P04637, Q96KR1, Q8TDI0, Q8IXK0, Q9BRR0, P13010, P84022, H3BT57, Q9NW08, A0A7I2YQQ0, P49736, P09874, Q13263, A0A0D9SGE8, Q9UNY4, P26358, P30876, Q5BKZ1, Q14839, A0A7I2V5F6, P35244, P13631, A0A7I2V5D0, Q9H2P0, A0A7I2V5F1, Q96S55, P19338, P42677, A0A7I2V490, Q9NX58, O60870, F2Z2R5, Q15796, A0A7I2V311, A0A0A0MRN4	111	1336	18908	4.46256	2.13047e-11	5.32222e-12	4.82499e-12	13.1327
GOTERM_MF_DIRECT	GO:0031625~	Ubiquitin protein ligase binding	14.4144	3.00142e-10	P31689, Q13501, O75925, P15927, Q12933, Q9Y4X5, P04637, A0A2R8YDE6, P13010, P84022, H3BT57, O15344, P00533, P55072, Q15796, Q9UBN7, Q13263	111	307	18908	8.87778	8.67411e-08	1.73482e-08	1.57275e-08	9.52267
GOTERM_MF_DIRECT	GO:0005515~	Protein binding	89.1892	4.83541e-08	O95159, Q8IWS0, Q16629, P29375, Q7RTV0, Q9Y265, Q96QC0, P15927, Q96B54, P04637, P49023, Q9BRR0, P84022, H3BT57, Q92973, Q7L2E3, P62633, Q15024, Q92974, P31689, Q13642, P30876, Q15428, A0A7I2V5F6, P35244, P13631, Q9H7Z6, Q9H2P0, A0A7I2V5F1, Q96S55, P19338, Q9C0B5, F8WEU8, P68104, Q92841, P20042, P00533, Q15796, A0A7I2V311, O75925, P27694, P22681, A8MTP4, Q969J2, F8W6K1, Q8IXK0, Q99590, H7BZM7, Q14…	111	12619	18908	1.33639	1.39742e-05	2.32905e-06	2.11146e-06	7.31557
GOTERM_MF_DIRECT	GO:0019899~	Enzyme binding	13.5135	6.10179e-08	Q13501, O75925, Q8IWS0, P15927, Q12933, P04637, A0A2R8YDE6, Q9H7Z6, P84022, O15344, P00533, P26368, Q9GZT9, Q9UBN7, P49736, P09874, A0A0D9SGE8	111	390	18908	6.55163	1.7634e-05	2.51917e-06	2.28381e-06	7.21454
GOTERM_MF_DIRECT	GO:0003682~	Chromatin binding	12.6126	3.38994e-06	P30876, A0A7I2YQA8, P04637, Q14839, Q8TDI0, A0A7I2V5F6, Q8IXK0, P51610, P13631, Q9BRR0, A0A7I2V5D0, Q9H2P0, A0A7I2V5F1, A0A7I2V490, Q7L2E3, F2Z2R5, P00533, Q15796, A0A7I2V311, A0A7I2YQQ0, Q13263, P26358	111	469	18908	5.08485	0.000979214	0.000122461	0.00011102	5.46981
GOTERM_MF_DIRECT	GO:0004842~	Ubiquitin-protein transferase activity	9.00901	1.70922e-05	A0A3B3IUA7, Q5T4S7, Q14258, P22681, Q96JP5, Q12933, O75679, H3BT57, Q9Y4X5, A0A0A0MSW0, O95376, Q13263	111	253	18908	6.7329	0.0049275	0.000548849	0.000497572	4.7672
GOTERM_MF_DIRECT	GO:0008134~	transcription factor binding	8.10811	3.04202e-05	Q14192, P84022, P04637, A0A2R8YDE6, Q96EY1, Q15796, Q9UBN7, Q9H7Z6, P09874, Q92974	111	209	18908	7.33532	0.00875304	0.000879144	0.00079701	4.51684
GOTERM_MF_DIRECT	GO:0042393~	histone binding	7.20721	0.000123229	Q8IWS0, Q96T23, P29375, Q14839, Q8TDI0, F2Z2R5, Q8IXK0, H0YCN2, Q9H7Z6, P49736, A0A0D9SGE8, H0YDG9	111	190	18908	7.17231	0.0349886	0.00323757	0.00293509	3.90929
GOTERM_MF_DIRECT	GO:0003712~	transcription cofactor activity	6.30631	0.000168587	O75925, Q01844, Q96T23, Q14192, P49023, Q7LBC6, H0YCN2, Q9H7Z6, H0YDG9	111	140	18908	8.51712	0.0475577	0.00406014	0.00368082	3.77318
GOTERM_MF_DIRECT	GO:0019903~	protein phosphatase binding	5.40541	0.000200027	Q12933, P15927, P04637, P49023, P00533, P55072	111	92	18908	11.1093	0.0561743	0.00444676	0.00403132	3.69891
GOTERM_MF_DIRECT	GO:0019789~	SUMO transferase activity	3.6036	0.000272189	P49792, O75925, H3BT57, Q13263	111	22	18908	30.9713	0.0756583	0.00561877	0.00509383	3.56513
GOTERM_MF_DIRECT	GO:0003678~	DNA helicase activity	4.5045	0.000438428	P13010, Q9Y265, Q14839, Q8TDI0, F2Z2R5, P49736	111	61	18908	13.9625	0.119032	0.00844704	0.00765787	3.3581
GOTERM_MF_DIRECT	GO:0003684~	damaged DNA binding	4.5045	0.000663184	P27694, P13010, P15927, P35244, P09874	111	68	18908	12.5252	0.174465	0.0119788	0.0108596	3.17837
GOTERM_MF_DIRECT	GO:0061630~	ubiquitin protein ligase activity	8.10811	0.0007065	A0A3B3IUA7, Q5T4S7, Q14258, F8WEU8, P22681, H7BYG8, Q9Y4X5, Q9UBF6, Q12986, Q9Y508, A0A0A0MSW0, O95376	111	331	18908	4.63166	0.184742	0.0120105	0.0108884	3.15089
GOTERM_MF_DIRECT	GO:0061629~	RNA polymerase II sequence-specific DNA binding transcription factor binding	6.30631	0.000812032	O75925, P84022, P04637, Q14839, Q15796, Q9H7Z6, P09874	111	188	18908	6.34253	0.209249	0.01303	0.0118127	3.09043
GOTERM_MF_DIRECT	GO:0003713~	transcription coactivator activity	7.20721	0.000856643	A0A3B3IUA7, Q14258, P29375, Q9Y265, H3BT57, Q92841, P51610, Q9H7Z6, Q13263	111	262	18908	5.20129	0.219387	0.01303	0.0118127	3.0672
GOTERM_MF_DIRECT	GO:0016887~	ATPase activity	8.10811	0.00108964	Q96S55, P13010, Q9Y265, Q92841, Q7L2E3, Q14839, Q8TDI0, F2Z2R5, P55072, P49736	111	354	18908	4.33074	0.270267	0.0157452	0.0142742	2.96272
GOTERM_MF_DIRECT	GO:0008013~	beta-catenin binding	4.5045	0.00204519	P84022, P49023, A0A2R8YDE6, O60716, Q9UBN7, Q9H2P0	111	92	18908	9.25774	0.446594	0.0281457	0.0255161	2.68927
GOTERM_MF_DIRECT	GO:0045296~	cadherin binding	7.20721	0.0024989	A0A3B3IUA7, Q14258, Q7Z2W4, P22681, Q9Y265, Q8WU90, P00533, P51610, O60716	111	316	18908	4.31246	0.514748	0.0328265	0.0297597	2.60225
GOTERM_MF_DIRECT	GO:0019901~	protein kinase binding	9.00901	0.00297936	Q9H0H5, Q13501, Q12933, P84022, P68104, P04637, Q96EY1, P00533, O60716, P09874	111	511	18908	3.33351	0.577819	0.0374364	0.0339388	2.52588
GOTERM_MF_DIRECT	GO:0003727~	single-stranded RNA binding	3.6036	0.00325685	P52597, P09234, D6RAT4, Q96KR1, P62633	111	51	18908	13.3602	0.610451	0.0392179	0.0355539	2.4872
GOTERM_MF_DIRECT	GO:0003676~	nucleic acid binding	7.20721	0.00411724	F8WEA1, P52597, Q16629, Q15428, C9JAB2, Q92841, Q7L2E3, D6RAT4, Q96KR1, P43243, P62633, A0A0B4J1Z1	111	346	18908	3.93855	0.696489	0.0475953	0.0431487	2.38539
GOTERM_MF_DIRECT	GO:0003697~	single-stranded DNA binding	4.5045	0.00457037	P27694, P15927, D6RAT4, P35244, P62633, P49736	111	115	18908	7.40619	0.733895	0.0508014	0.0460553	2.34005
GOTERM_MF_DIRECT	GO:0042802~	identical protein binding	18.018	0.00476838	Q13501, Q12933, Q15637, P04637, Q969J2, Q8IXK0, P51610, Q96S55, P19338, Q01844, Q14192, P84022, H3BT57, Q9NX58, P43243, O15344, P00533, P55072, Q15796, P09874	111	1722	18908	1.97842	0.748763	0.0510393	0.0462709	2.32163
GOTERM_MF_DIRECT	GO:0030971~	receptor tyrosine kinase binding	3.6036	0.00644147	Q13501, H7BZM7, P22681, P04637	111	65	18908	10.4826	0.845507	0.0664851	0.0602737	2.19102
GOTERM_MF_DIRECT	GO:1990841~	promoter-specific chromatin binding	3.6036	0.00672001	A0A7I2V490, A0A7I2YQA8, P84022, P04637, A0A7I2V5F6, A0A7I2V311, A0A7I2YQQ0, A0A7I2V5D0, Q13263, P26358, A0A7I2V5F1	111	66	18908	10.3238	0.857532	0.0669683	0.0607118	2.17263
GOTERM_MF_DIRECT	GO:0016787~	hydrolase activity	6.30631	0.00711636	P13010, Q92841, A0A2R8YDE6, Q14839, Q8TDI0, F2Z2R5, P55072, Q9UBN7, Q9UNY4	111	291	18908	4.09758	0.873052	0.0685543	0.0621496	2.14774
GOTERM_MF_DIRECT	GO:0042826~	histone deacetylase binding	4.5045	0.00760691	Q8IWS0, P04637, A0A2R8YDE6, Q14839, Q9UBN7, P09874, A0A0D9SGE8	111	133	18908	6.40385	0.889948	0.070916	0.0642906	2.11879
GOTERM_MF_DIRECT	GO:0070412~	R-SMAD binding	2.7027	0.00851478	P84022, Q15796, P09874	111	24	18908	21.2928	0.915526	0.0768991	0.0697147	2.06983
GOTERM_MF_DIRECT	GO:0000175~	3'-5'-exoribonuclease activity	2.7027	0.0157455	Q9NQT4, Q9NQT5, Q15024	111	33	18908	15.4857	0.989813	0.137893	0.12501	1.80284
GOTERM_MF_DIRECT	GO:0070615~	nucleosome-dependent ATPase activity	2.7027	0.0166668	Q14839, Q8TDI0, F2Z2R5, Q9UNY4	111	34	18908	15.0302	0.992228	0.141668	0.128432	1.77815
GOTERM_MF_DIRECT	GO:0032549~	ribonucleoside binding	1.8018	0.0173525	P30876, Q9NW08	111	3	18908	113.562	0.993647	0.143282	0.129896	1.76064
GOTERM_MF_DIRECT	GO:0051213~	dioxygenase activity	2.7027	0.0205738	P29375, Q7LBC6, Q9GZT9	111	38	18908	13.4481	0.997541	0.165162	0.149732	1.68669
GOTERM_MF_DIRECT	GO:0003735~	structural constituent of ribosome	4.5045	0.0246021	P61927, P42677, Q71UM5, A6NKH3, P61513	111	189	18908	4.50641	0.999253	0.188782	0.171145	1.60903
GOTERM_MF_DIRECT	GO:0048487~	beta-tubulin binding	2.7027	0.0248225	Q9H0H5, A0A2R8YDE6, Q9UBN7, Q9H2P0	111	42	18908	12.1673	0.9993	0.188782	0.171145	1.60515
GOTERM_MF_DIRECT	GO:0003714~	transcription corepressor activity	4.5045	0.0289953	O75925, Q14192, Q15637, Q7Z5L9, Q13263	111	199	18908	4.27996	0.999797	0.214862	0.194789	1.53767
GOTERM_MF_DIRECT	GO:0030544~	Hsp70 protein binding	2.7027	0.0305871	P31689, O60884, Q96EY1	111	47	18908	10.8729	0.999874	0.217821	0.197471	1.51446
GOTERM_MF_DIRECT	GO:0003690~	double-stranded DNA binding	3.6036	0.0309019	P13010, O60870, P00533, Q15796	111	117	18908	5.82367	0.999885	0.217821	0.197471	1.51001
GOTERM_MF_DIRECT	GO:0044877~	macromolecular complex binding	6.30631	0.0343467	Q13501, P49792, P13010, Q12933, P11802, Q96EY1, P55072	111	415	18908	2.87324	0.999959	0.236338	0.214258	1.46412
GOTERM_MF_DIRECT	GO:0046332~	SMAD binding	2.7027	0.0355413	P84022, H3BT57, Q15796	111	51	18908	10.0201	0.999971	0.238871	0.216554	1.44927
GOTERM_MF_DIRECT	GO:0000987~	core promoter proximal region sequence-specific DNA binding	2.7027	0.0448919	P84022, P04637, Q15796	111	58	18908	8.81081	0.999998	0.294858	0.267311	1.34783
GOTERM_MF_DIRECT	GO:0005507~	copper ion binding	2.7027	0.0462946	F8WEU8, Q9UBF6, P04637, Q9H2P0	111	59	18908	8.66148	0.999999	0.297314	0.269537	1.33447
GOTERM_MF_DIRECT	GO:0000976~	transcription regulatory region sequence-specific DNA binding	4.5045	0.0503493	Q01954, P13010, P29375, P84022, P04637	111	238	18908	3.57862	1	0.316325	0.286772	1.29801
GOTERM_MF_DIRECT	GO:0003729~	mRNA binding	4.5045	0.0548977	Q9NZI8, Q15637, P09234, D6RAT4, P20042, P62633	111	245	18908	3.47637	1	0.334355	0.303118	1.26045
GOTERM_MF_DIRECT	GO:0001094~	TFIID-class transcription factor binding	1.8018	0.0566899	Q9Y265, P04637	111	10	18908	34.0685	1	0.334355	0.303118	1.24649
GOTERM_MF_DIRECT	GO:0098505~	G-rich strand telomeric DNA binding	1.8018	0.0566899	P27694, P15927	111	10	18908	34.0685	1	0.334355	0.303118	1.24649
GOTERM_MF_DIRECT	GO:0061665~	SUMO ligase activity	1.8018	0.0621807	P49792, O75925	111	11	18908	30.9713	1	0.357697	0.324279	1.20634
GOTERM_MF_DIRECT	GO:0005524~	ATP binding	13.5135	0.0631231	P31689, Q9Y265, P11802, Q14839, Q8TDI0, Q96S55, P13010, O60884, Q92841, Q7L2E3, Q96EY1, F2Z2R5, P00533, P55072, P49736, Q9UNY4	111	1541	18908	1.6581	1	0.357697	0.324279	1.19981
GOTERM_MF_DIRECT	GO:0070410~	co-SMAD binding	1.8018	0.0676398	P84022, Q15796	111	12	18908	28.3904	1	0.368828	0.33437	1.1698
GOTERM_MF_DIRECT	GO:0097371~	MDM2/MDM4 family protein binding	1.8018	0.0676398	P61927, P04637	111	12	18908	28.3904	1	0.368828	0.33437	1.1698
GOTERM_MF_DIRECT	GO:0070411~	I-SMAD binding	1.8018	0.0784636	P84022, Q15796	111	14	18908	24.3346	1	0.419926	0.380694	1.10533
GOTERM_MF_DIRECT	GO:0031490~	chromatin DNA binding	2.7027	0.085996	P29375, P84022, Q7LBC6	111	84	18908	6.08366	1	0.45187	0.409654	1.06552
GOTERM_MF_DIRECT	GO:0005160~	transforming growth factor beta receptor binding	1.8018	0.0891629	P84022, Q15796	111	16	18908	21.2928	1	0.460145	0.417155	1.04982
GOTERM_MF_DIRECT	GO:0001216~	bacterial-type RNA polymerase transcriptional activator activity, sequence-specific DNA binding	1.8018	0.0997392	Q01954, P04637	111	18	18908	18.9269	1	0.505695	0.45845	1.00113

## Sheet: Human GO CC
Category	Term	Column1	%	PValue	Genes	List Total	Pop Hits	Pop Total	Fold Enrichment	Bonferroni	Benjamini	FDR	negative log10
GOTERM_CC_DIRECT	GO:0005634~	Nucleus	75.6757	1.16571e-24	O95159, Q8IWS0, Q16629, Q9Y265, P29375, Q7RTV0, Q96QC0, P15927, P04637, Q9BRR0, P84022, H3BT57, Q92973, P62633, Q15024, P31689, Q13642, P30876, Q15428, A0A7I2V5F6, P35244, P13631, Q9H7Z6, Q9H2P0, A0A7I2V5F1, Q96S55, P19338, F8WEU8, P68104, Q92841, P00533, Q15796, A0A7I2V311, O75925, Q14588, P27694, Q969J2, Q8IXK0, H7BZM7, Q7Z570, Q14192, P09234, P09874, Q13263, P26358, Q9NZI8, Q5BKZ1, C9JAB2, D6R…	109	6007	20580	2.64022	3.01919e-22	3.01919e-22	2.77439e-22	23.9334
GOTERM_CC_DIRECT	GO:0005654~	Nucleoplasm	63.0631	2.61016e-24	P52597, A0A3B3IUA7, Q8IWS0, Q16629, Q9Y265, P29375, Q7RTV0, Q96QC0, P15927, Q9UBF6, P04637, Q12986, P11802, Q8TDI0, Q9BRR0, Q01844, P84022, H3BT57, Q9NW08, P55072, P49736, Q15024, A0A0D9SGE8, F8WEA1, Q9H0H5, A8MUK0, Q14258, P30876, Q9Y4X5, Q15428, Q7Z5L9, A0A2R8YDE6, A0A7I2V5F6, P35244, P13631, Q7LBC6, Q9H7Z6, H0YDG9, A0A7I2V5F1, P19338, Q01954, F8WEU8, Q96JP5, Q92841, F2Z2R5, H0YCN2, Q15796, A0A…	109	3960	20580	3.3375	6.76032e-22	3.38016e-22	3.10609e-22	23.5833
GOTERM_CC_DIRECT	GO:0005737~	Cytoplasm	51.3514	4.52774e-08	P21291, Q16629, P52594, Q9UBF6, P04637, P49023, Q9BRR0, Q01844, O60884, P84022, H3BT57, Q92973, Q7L2E3, P55072, P62633, P49736, Q15024, Q92974, F8WEA1, P31689, Q13642, Q9Y4X5, Q7Z5L9, A0A2R8YDE6, P13631, Q9H2P0, P19338, Q01954, Q7Z2W4, F8WEU8, P68104, Q92841, P20042, P00533, Q15796, P61513, Q5VZF2, P61927, P22681, Q96KR1, O95376, H7BZM7, Q7Z570, Q9GZT9, P09874, P49792, Q13501, Q9NZI8, O75679, C9J…	109	5593	20580	1.92419	1.17268e-05	3.90895e-06	3.592e-06	7.34412
GOTERM_CC_DIRECT	GO:0000781~	Chromosome, telomeric region	9.00901	3.26201e-07	Q96S55, P27694, P13010, P30876, P15927, Q96QC0, H3BT57, Q14839, P49736, P09874	109	173	20580	10.9137	8.44824e-05	2.11215e-05	1.94089e-05	6.48652
GOTERM_CC_DIRECT	GO:0005829~	Cytosol	47.7477	1.69456e-06	P52597, A0A3B3IUA7, Q9Y265, P52594, Q9UBF6, P04637, Q12986, P49023, P11802, Q9Y508, Q8WU90, Q8TDI0, O60884, P84022, H3BT57, Q92973, Q7L2E3, Q9NW08, P55072, P62633, Q15024, Q92974, Q9H0H5, P31689, Q14258, Q13642, Q9Y4X5, A0A2R8YDE6, Q7Z2W4, F8WEU8, P68104, Q92841, F2Z2R5, P20042, Q15796, P61513, P61927, P22681, A0A0A0MSW0, P13010, H7BYG8, Q9BXW9, Q9GZT9, P09874, Q9UNY4, P49792, Q13501, Q5T4S7, Q9N…	109	5520	20580	1.81282	0.000438795	8.77782e-05	8.0661e-05	5.77094
GOTERM_CC_DIRECT	GO:0016363~	Nuclear matrix	7.20721	5.60206e-06	Q7RTV0, Q9Y265, H3BT57, O60870, Q5BKZ1, P04637, P43243, A0A0A0MRN4, Q9H7Z6	109	130	20580	11.6189	0.00144989	0.000241822	0.000222215	5.25165
GOTERM_CC_DIRECT	GO:0005730~	Nucleolus	18.9189	3.46576e-05	Q8IWS0, P29375, A8MTP4, P04637, F8W6K1, P11802, Q12986, Q99590, Q01844, H7BZM7, P13010, H3BT57, Q9BXW9, Q15024, P09874, A0A0D9SGE8, A8MUK0, Q9NQT4, Q9NQT5, P19338, Q01954, Q96JP5, P68104, Q9NX58, Q92841	109	1396	20580	2.84023	0.00893631	0.00116345	0.00106912	4.4602
GOTERM_CC_DIRECT	GO:0000785~	Chromatin	16.2162	3.59368e-05	P15927, Q96QC0, O75679, P04637, P11802, Q12986, Q14839, Q8TDI0, Q7LBC6, P13631, Q9H2P0, P84022, H3BT57, F2Z2R5, Q9BXW9, Q15796, P49736, Q13263, P09874	109	1059	20580	3.20919	0.00926462	0.00116345	0.00106912	4.44446
GOTERM_CC_DIRECT	GO:0005681~	Spliceosomal complex	6.30631	4.91007e-05	P19338, Q7RTV0, Q15637, Q15428, P09234, P26368, Q9UNY4	109	124	20580	10.6585	0.0126369	0.00141301	0.00129844	4.30891
GOTERM_CC_DIRECT	GO:0005662~	DNA replication factor A complex	2.7027	0.000162593	P27694, P15927, P35244	109	4	20580	141.606	0.0412405	0.00421116	0.00386971	3.7889
GOTERM_CC_DIRECT	GO:0016605~	PML body	5.40541	0.000241262	Q13501, O75925, P27694, P15927, H3BT57, P04637	109	106	20580	10.6872	0.0605818	0.00568063	0.00522004	3.61751
GOTERM_CC_DIRECT	GO:0005925~	focal adhesion	9.00901	0.000404728	P21291, Q13642, P22681, Q14192, P49023, O15231, P00533, Q9NR12, P61513, Q92974	109	425	20580	4.44253	0.0995365	0.00855201	0.0078586	3.39284
GOTERM_CC_DIRECT	GO:0016604~	nuclear body	8.10811	0.000429251	A8MUK0, A0A3B3IUA7, Q14258, P15927, Q96QC0, Q9Y4X5, Q15637, A8MTP4, P04637, F8W6K1, Q99590, Q9BXW9, P09874	109	340	20580	4.99784	0.10524	0.00855201	0.0078586	3.36729
GOTERM_CC_DIRECT	GO:0035861~	site of double-strand break	4.5045	0.00075913	P15927, P04637, P35244, P55072, P09874	109	78	20580	12.103	0.178554	0.0140439	0.0129052	3.11968
GOTERM_CC_DIRECT	GO:0032991~	macromolecular complex	10.8108	0.00116814	P04637, A0A2R8YDE6, Q14839, P51610, P13010, O60870, P00533, P55072, Q15796, Q9UBN7, Q13263, P09874, Q92974	109	703	20580	3.22288	0.261197	0.0193373	0.0177694	2.93251
GOTERM_CC_DIRECT	GO:0101019~	nucleolar exosome (RNase complex)	2.7027	0.00119458	Q9NQT4, Q9NQT5, Q15024	109	10	20580	56.6422	0.266246	0.0193373	0.0177694	2.92278
GOTERM_CC_DIRECT	GO:0000176~	nuclear exosome (RNase complex)	2.7027	0.00174008	Q9NQT4, Q9NQT5, Q15024	109	12	20580	47.2018	0.363056	0.0265106	0.0243611	2.75943
GOTERM_CC_DIRECT	GO:0000792~	heterochromatin	3.6036	0.00217272	H3BT57, Q8TDI0, F2Z2R5, Q8IXK0, Q13263	109	49	20580	15.4128	0.4307	0.0308575	0.0283555	2.663
GOTERM_CC_DIRECT	GO:0005840~	ribosome	5.40541	0.00236924	P61927, P42677, Q71UM5, A6NKH3, Q15637, P61513	109	176	20580	6.43661	0.459014	0.0308575	0.0283555	2.62539
GOTERM_CC_DIRECT	GO:0000177~	cytoplasmic exosome (RNase complex)	2.7027	0.00238282	Q9NQT4, Q9NQT5, Q15024	109	14	20580	40.4587	0.460917	0.0308575	0.0283555	2.62291
GOTERM_CC_DIRECT	GO:1990904~	ribonucleoprotein complex	5.40541	0.00280382	P52597, P19338, P13010, Q9NZI8, Q9Y265, Q92841	109	183	20580	6.1904	0.516744	0.0345805	0.0317766	2.55225
GOTERM_CC_DIRECT	GO:0000178~	exosome (RNase complex)	2.7027	0.00312074	Q9NQT4, Q9NQT5, Q15024	109	16	20580	35.4014	0.554935	0.0367396	0.0337607	2.50574
GOTERM_CC_DIRECT	GO:0071004~	U2-type prespliceosome	2.7027	0.00352476	Q15428, P09234, P26368	109	17	20580	33.3189	0.599293	0.0396919	0.0364736	2.45287
GOTERM_CC_DIRECT	GO:0005667~	transcription factor complex	5.40541	0.00786956	P84022, P04637, P11802, Q15796, P13631, P09874	109	234	20580	4.84121	0.870785	0.0805893	0.074055	2.10405
GOTERM_CC_DIRECT	GO:0015030~	Cajal body	3.6036	0.0080395	Q01844, H7BZM7, Q9Y4X5, P09234	109	78	20580	9.68243	0.876393	0.0805893	0.074055	2.09477
GOTERM_CC_DIRECT	GO:0030426~	growth cone	4.5045	0.00809004	H7BZM7, Q9NZI8, Q7Z570, P22681, O60716	109	150	20580	6.29358	0.878013	0.0805893	0.074055	2.09205
GOTERM_CC_DIRECT	GO:0005875~	microtubule associated complex	2.7027	0.0145034	P49023, A0A2R8YDE6, O15344, Q9UBN7	109	35	20580	16.1835	0.977266	0.12953	0.119028	1.83853
GOTERM_CC_DIRECT	GO:0071339~	MLL1 complex	2.7027	0.0145034	Q9Y265, P51610, Q9H7Z6	109	35	20580	16.1835	0.977266	0.12953	0.119028	1.83853
GOTERM_CC_DIRECT	GO:0090734~	site of DNA damage	2.7027	0.0145034	P27694, P13010, P09874	109	35	20580	16.1835	0.977266	0.12953	0.119028	1.83853
GOTERM_CC_DIRECT	GO:0048471~	perinuclear region of cytoplasm	9.00901	0.0194221	Q96S55, P31689, H7BZM7, Q9NZI8, P22681, P11802, A0A2R8YDE6, P00533, P02787, P55072, Q9UBN7	109	766	20580	2.46485	0.993779	0.167677	0.154082	1.7117
GOTERM_CC_DIRECT	GO:0034774~	secretory granule lumen	3.6036	0.0227099	P13010, P68104, P02787, P55072	109	115	20580	6.56721	0.997393	0.189737	0.174353	1.64378
GOTERM_CC_DIRECT	GO:0032993~	protein-DNA complex	2.7027	0.0243057	P13010, P29375, P09874	109	46	20580	12.3135	0.998293	0.195289	0.179454	1.61429
GOTERM_CC_DIRECT	GO:0000243~	commitment complex	1.8018	0.0259676	P09234, P26368	109	5	20580	75.5229	0.998902	0.195289	0.179454	1.58557
GOTERM_CC_DIRECT	GO:0097413~	Lewy body	1.8018	0.0259676	Q13501, Q9Y4X5	109	5	20580	75.5229	0.998902	0.195289	0.179454	1.58557
GOTERM_CC_DIRECT	GO:0016607~	nuclear speck	6.30631	0.0263904	F8WEA1, O75925, Q16629, Q7RTV0, Q15428, C9JAB2, Q92841, Q8TDI0, F2Z2R5, P26368, A0A0B4J1Z1	109	432	20580	3.05938	0.999019	0.195289	0.179454	1.57855
GOTERM_CC_DIRECT	GO:0089701~	U2AF	1.8018	0.0361666	Q15637, P26368	109	7	20580	53.945	0.999928	0.260198	0.239101	1.44169
GOTERM_CC_DIRECT	GO:0022625~	cytosolic large ribosomal subunit	2.7027	0.0396509	P61927, A6NKH3, P61513	109	60	20580	9.44037	0.999972	0.273785	0.251586	1.40175
GOTERM_CC_DIRECT	GO:0071144~	SMAD2-SMAD3 protein complex	1.8018	0.0412263	P84022, Q15796	109	8	20580	47.2018	0.999982	0.273785	0.251586	1.38483
GOTERM_CC_DIRECT	GO:0071141~	SMAD protein complex	1.8018	0.0412263	P84022, Q15796	109	8	20580	47.2018	0.999982	0.273785	0.251586	1.38483
GOTERM_CC_DIRECT	GO:0000791~	euchromatin	2.7027	0.0433119	Q9NQT4, Q9NQT5, Q13263	109	63	20580	8.99083	0.99999	0.280445	0.257706	1.36339
GOTERM_CC_DIRECT	GO:0044545~	NSL complex	1.8018	0.0562482	P51610, Q9H7Z6	109	11	20580	34.3286	1	0.355324	0.326514	1.24989
GOTERM_CC_DIRECT	GO:0022626~	cytosolic ribosome	2.7027	0.0619211	P61927, P42677, P61513	109	77	20580	7.35613	1	0.381847	0.350886	1.20816
GOTERM_CC_DIRECT	GO:0010494~	cytoplasmic stress granule	2.7027	0.0811688	A0A3B3IUA7, Q14258, Q9NZI8, P55072	109	90	20580	6.29358	1	0.488901	0.44926	1.09061
GOTERM_CC_DIRECT	GO:0016581~	NuRD complex	1.8018	0.0855958	Q14839, Q8TDI0, F2Z2R5	109	17	20580	22.2126	1	0.503848	0.462996	1.06755
GOTERM_CC_DIRECT	GO:0005684~	U2-type spliceosomal complex	1.8018	0.095176	Q7RTV0, Q15428	109	19	20580	19.8745	1	0.547791	0.503375	1.02147
GOTERM_CC_DIRECT	GO:0032587~	ruffle membrane	2.7027	0.09869	P68104, P00533, Q92974	109	101	20580	5.60814	1	0.550671	0.506022	1.00573
GOTERM_CC_DIRECT	GO:0099092~	postsynaptic density, intracellular component	1.8018	0.0999288	O60716, Q92974	109	20	20580	18.8807	1	0.550671	0.506022	1.00031

## Sheet: Human GO BP
Category	Term	Column1	%	PValue	Genes	List Total	Pop Hits	Pop Total	Fold Enrichment	Bonferroni	Benjamini	FDR	Negativelog10
GOTERM_BP_DIRECT	GO:0000122~	Negative regulation of transcription from RNA polymerase II promoter	19.8198	7.07064e-08	O75925, Q8IWS0, P29375, A0A7I2YQA8, Q9GZU2, P04637, Q12986, Q8TDI0, Q9BRR0, Q14192, P84022, A0A7I2YQQ0, P62633, Q13263, P09874, A0A0D9SGE8, P26358, Q13501, Q7Z5L9, A0A2R8YDE6, D6RAT4, Q14839, A0A3B3IRU6, A0A7I2V5F6, P51610, P13631, A0A7I2V5D0, A0A7I2V5F1, M0QZD4, A0A7I2V490, Q9NX58, A0A3B3ISL2, Q96EY1, F2Z2R5, A0A7I2V311, Q9UBN7	108	973	19333	4.04749	6.99262e-05	4.29742e-05	4.15403e-05	7.15054
GOTERM_BP_DIRECT	GO:0045893~	Positive regulation of transcription, DNA-templated	17.1171	8.69043e-08	O75925, A0A3B3IUA7, Q14258, P29375, Q7RTV0, Q9Y265, O75679, P04637, D6RAT4, Q14839, P51610, Q9BRR0, Q9H7Z6, H0YDG9, Q96T23, P84022, H3BT57, P00533, P02787, Q15796, H0YCN2, P62633, Q13263	108	724	19333	4.69776	8.59447e-05	4.29742e-05	4.15403e-05	7.06096
GOTERM_BP_DIRECT	GO:0006351~	Transcription, DNA-templated	9.00901	3.84964e-06	O75925, P30876, A0A7I2YQA8, P49023, A0A7I2V5F6, Q7LBC6, Q9H7Z6, A0A7I2V5D0, A0A7I2V5F1, Q01844, A0A7I2V490, Q14192, Q9NW08, Q15796, A0A7I2V311, A0A7I2YQQ0, P26358	108	221	19333	8.09997	0.00380007	0.0012691	0.00122675	5.41458
GOTERM_BP_DIRECT	GO:0000723~	Telomere maintenance	5.40541	1.86582e-05	P27694, P13010, Q9Y265, P15927, P35244, P09874	108	59	19333	18.2043	0.0182839	0.00374499	0.00362003	4.72913
GOTERM_BP_DIRECT	GO:0010332~	Response to gamma radiation	4.5045	1.89332e-05	P22681, H3BT57, P04637, Q9BXW9, P09874	108	29	19333	30.8637	0.0185509	0.00374499	0.00362003	4.72278
GOTERM_BP_DIRECT	GO:0006397~	mRNA processing	8.10811	3.17188e-05	F8WEA1, A8MUK0, Q16629, A8MTP4, Q5BKZ1, Q15428, C9JAB2, F8W6K1, Q99590, H7BZM7, O60870, P26368, A0A0A0MRN4, A0A0B4J1Z1, Q5VZF2, Q9UNY4	108	221	19333	7.28997	0.0308835	0.00522832	0.00505387	4.49868
GOTERM_BP_DIRECT	GO:0008380~	RNA splicing	7.20721	0.000124308	F8WEA1, A8MUK0, Q16629, A8MTP4, Q5BKZ1, Q15428, C9JAB2, F8W6K1, Q99590, H7BZM7, P26368, A0A0A0MRN4, A0A0B4J1Z1, Q5VZF2, Q9UNY4	108	200	19333	7.16037	0.11569	0.0175629	0.0169769	3.9055
GOTERM_BP_DIRECT	GO:0071364~	cellular response to epidermal growth factor stimulus	4.5045	0.000143072	P19338, H7BZM7, P22681, P68104, P00533	108	48	19333	18.6468	0.131952	0.0176873	0.0170971	3.84444
GOTERM_BP_DIRECT	GO:0006281~	DNA repair	8.10811	0.00023059	P27694, Q9Y265, O60870, Q9BXW9, P35244, P55072, Q13263, P09874, Q9UNY4	108	294	19333	5.47988	0.203939	0.0221942	0.0214536	3.63716
GOTERM_BP_DIRECT	GO:0007179~	transforming growth factor beta receptor signaling pathway	5.40541	0.000245611	P84022, H3BT57, P04637, P49023, Q15796, P09874	108	101	19333	10.6342	0.215681	0.0221942	0.0214536	3.60975
GOTERM_BP_DIRECT	GO:1990830~	cellular response to leukemia inhibitory factor	5.40541	0.000269087	F8WEA1, P19338, A0A3B3IUA7, Q14258, Q16629, P13010, H3BT57, C9JAB2, P13631, A0A0B4J1Z1	108	103	19333	10.4277	0.233686	0.0221942	0.0214536	3.57011
GOTERM_BP_DIRECT	GO:0023019~	signal transduction involved in regulation of gene expression	3.6036	0.000269292	Q12933, P84022, Q15796, P09874	108	23	19333	31.132	0.233841	0.0221942	0.0214536	3.56978
GOTERM_BP_DIRECT	GO:0045892~	negative regulation of transcription, DNA-templated	10.8108	0.000433056	Q15637, P04637, A0A2R8YDE6, Q14839, Q8IXK0, Q9BRR0, Q9H7Z6, H0YDG9, Q96T23, P13010, H3BT57, Q15796, H0YCN2, Q9UBN7, Q13263	108	591	19333	3.63471	0.348439	0.0312885	0.0302445	3.36346
GOTERM_BP_DIRECT	GO:0016567~	protein ubiquitination	9.90991	0.00044291	Q5T4S7, P22681, O75679, Q9Y4X5, Q9UBF6, Q12986, Q9Y508, A0A0A0MSW0, O95376, F8WEU8, H3BT57, P55072, Q13263	108	498	19333	3.95402	0.354762	0.0312885	0.0302445	3.35368
GOTERM_BP_DIRECT	GO:0045087~	innate immune response	10.8108	0.000526577	A0A3B3IUA7, Q14258, Q96S55, Q9C0B5, Q7Z2W4, P13010, H3BT57, Q9NX58, Q9NW08, P43243, Q13263, P09874, Q92974	108	605	19333	3.5506	0.406027	0.0326131	0.0315248	3.27854
GOTERM_BP_DIRECT	GO:0006338~	chromatin remodeling	6.30631	0.000527613	Q96T23, P29375, Q9Y265, Q14839, Q8TDI0, F2Z2R5, H0YCN2, P51610, Q9UNY4, H0YDG9	108	182	19333	6.88497	0.406636	0.0326131	0.0315248	3.27768
GOTERM_BP_DIRECT	GO:0006364~	rRNA processing	5.40541	0.000809578	P42677, Q9NX58, Q92841, Q9NQT4, Q9NQT5, Q15024	108	131	19333	8.1989	0.551119	0.0449947	0.0434934	3.09174
GOTERM_BP_DIRECT	GO:0034475~	U4 snRNA 3'-end processing	2.7027	0.000831435	Q9NQT4, Q9NQT5, Q15024	108	8	19333	67.1285	0.560726	0.0449947	0.0434934	3.08017
GOTERM_BP_DIRECT	GO:0000398~	mRNA splicing, via spliceosome	6.30631	0.000886884	F8WEA1, P52597, Q16629, Q7RTV0, Q15637, Q15428, C9JAB2, P09234, P26368, A0A0B4J1Z1	108	201	19333	6.23415	0.584186	0.0449947	0.0434934	3.05213
GOTERM_BP_DIRECT	GO:0006511~	ubiquitin-dependent protein catabolic process	7.20721	0.000962286	Q13501, A0A3B3IUA7, Q5T4S7, Q14258, F8WEU8, P22681, Q9Y4X5, Q9UBF6, Q9Y508, A0A0A0MSW0, O95376	108	281	19333	5.09635	0.614093	0.0449947	0.0434934	3.0167
GOTERM_BP_DIRECT	GO:0045944~	positive regulation of transcription from RNA polymerase II promoter	15.3153	0.000988909	Q13501, Q9GZU2, P04637, D6RAT4, A0A3B3IRU6, P51610, P13631, Q9H7Z6, H0YDG9, P19338, Q96T23, M0QZD4, P84022, A0A3B3ISL2, Q92841, P00533, Q15796, H0YCN2, Q9GZT9, P62633, P09874, Q6IQ21, Q92974	108	1210	19333	2.51501	0.624131	0.0449947	0.0434934	3.00484
GOTERM_BP_DIRECT	GO:0006355~	regulation of transcription, DNA-templated	13.5135	0.00100089	O95159, Q14588, Q9Y265, P04637, Q969J2, Q12986, D6RAT4, P51610, Q9H7Z6, H0YDG9, Q01954, Q01844, Q96T23, P84022, H3BT57, Q15796, H0YCN2, P62633	108	979	19333	2.74274	0.628564	0.0449947	0.0434934	2.99961
GOTERM_BP_DIRECT	GO:1901798~	positive regulation of signal transduction by p53 class mediator	2.7027	0.00106513	P61927, H3BT57, Q8TDI0, F2Z2R5	108	9	19333	59.6698	0.65145	0.0458005	0.0442722	2.9726
GOTERM_BP_DIRECT	GO:0006919~	activation of cysteine-type endopeptidase activity involved in apoptotic process	4.5045	0.00111358	P84022, Q71UM5, H3BT57, Q96EY1, P55072	108	82	19333	10.9152	0.667775	0.0458887	0.0443575	2.95328
GOTERM_BP_DIRECT	GO:0006310~	DNA recombination	4.5045	0.00116503	P27694, P13010, Q9Y265, O60870, P35244	108	83	19333	10.7837	0.684276	0.0460886	0.0445507	2.93366
GOTERM_BP_DIRECT	GO:0034427~	nuclear-transcribed mRNA catabolic process, exonucleolytic, 3'-5'	2.7027	0.0013266	Q9NQT4, Q9NQT5, Q15024	108	10	19333	53.7028	0.730956	0.0504619	0.0487781	2.87726
GOTERM_BP_DIRECT	GO:0050821~	protein stabilization	6.30631	0.00141084	Q9Y265, P84022, H3BT57, P04637, Q96EY1, P51610, O60716	108	220	19333	5.69575	0.752491	0.0516786	0.0499542	2.85052
GOTERM_BP_DIRECT	GO:0006412~	translation	6.30631	0.00151148	P61927, P42677, Q71UM5, P68104, A6NKH3, P00533, P61513	108	223	19333	5.61912	0.775972	0.0533876	0.0516062	2.8206
GOTERM_BP_DIRECT	GO:0006289~	nucleotide-excision repair	3.6036	0.00173172	P27694, P15927, P04637, P35244	108	43	19333	16.652	0.819885	0.0590577	0.0570871	2.76152
GOTERM_BP_DIRECT	GO:0016925~	protein sumoylation	3.6036	0.00223918	P49792, O75925, H3BT57, Q13263	108	47	19333	15.2348	0.891068	0.0703008	0.0679551	2.64991
GOTERM_BP_DIRECT	GO:0031571~	mitotic G1 DNA damage checkpoint	2.7027	0.00227465	P15927, Q71UM5, P04637	108	13	19333	41.3098	0.894831	0.0703008	0.0679551	2.64309
GOTERM_BP_DIRECT	GO:0043928~	exonucleolytic nuclear-transcribed mRNA catabolic process involved in deadenylation-dependent decay	2.7027	0.00227465	Q9NQT4, Q9NQT5, Q15024	108	13	19333	41.3098	0.894831	0.0703008	0.0679551	2.64309
GOTERM_BP_DIRECT	GO:1902187~	negative regulation of viral release from host cell	2.7027	0.00264419	A0A3B3IUA7, Q14258, H3BT57, Q13263	108	14	19333	38.3591	0.927093	0.0776101	0.0750205	2.57771
GOTERM_BP_DIRECT	GO:0006606~	protein import into nucleus	4.5045	0.00266809	Q13501, Q96QC0, H3BT57, P04637, Q92973	108	104	19333	8.60621	0.928801	0.0776101	0.0750205	2.5738
GOTERM_BP_DIRECT	GO:0090263~	positive regulation of canonical Wnt signaling pathway	4.5045	0.0032664	Q9Y265, P84022, P00533, P55072, Q9H2P0	108	110	19333	8.13678	0.96067	0.0922992	0.0892195	2.48593
GOTERM_BP_DIRECT	GO:0007283~	spermatogenesis	8.10811	0.00388902	P31689, Q9H0H5, O75925, Q01954, P29375, Q9Y265, P52594, Q9Y508, Q8IXK0	108	457	19333	3.52535	0.9788	0.104492	0.101006	2.41016
GOTERM_BP_DIRECT	GO:0044790~	negative regulation by host of viral release from host cell	2.7027	0.00390921	A0A3B3IUA7, Q14258, H3BT57, Q13263	108	17	19333	31.5899	0.97922	0.104492	0.101006	2.40791
GOTERM_BP_DIRECT	GO:0030154~	cell differentiation	9.90991	0.00454364	Q13501, Q13642, Q01954, P52594, P84022, Q9Y508, P00533, Q15796, P13631, Q9NR12, Q92974	108	682	19333	2.88725	0.988934	0.113475	0.109688	2.3426
GOTERM_BP_DIRECT	GO:0006974~	cellular response to DNA damage stimulus	6.30631	0.00458784	P27694, P13010, P22681, O60870, P04637, P55072, P09874	108	279	19333	4.49127	0.98941	0.113475	0.109688	2.33839
GOTERM_BP_DIRECT	GO:0006260~	DNA replication	4.5045	0.00458947	P27694, P15927, O60870, P35244, P49736	108	121	19333	7.39708	0.989427	0.113475	0.109688	2.33824
GOTERM_BP_DIRECT	GO:0032508~	DNA duplex unwinding	3.6036	0.00491894	Q96S55, P13010, Q9Y265, Q8TDI0, F2Z2R5	108	62	19333	11.549	0.992379	0.118654	0.114695	2.30813
GOTERM_BP_DIRECT	GO:0006302~	double-strand break repair	3.6036	0.00774269	P13010, P04637, P55072, P09874	108	73	19333	9.80873	0.999541	0.182322	0.176238	2.11111
GOTERM_BP_DIRECT	GO:0051571~	positive regulation of histone H3-K4 methylation	2.7027	0.00837849	A0A7I2V490, A0A7I2YQA8, A0A7I2V5F6, A0A7I2V311, A0A7I2YQQ0, P51610, Q9H7Z6, A0A7I2V5D0, P26358, A0A7I2V5F1	108	25	19333	21.4811	0.999757	0.192705	0.186275	2.07683
GOTERM_BP_DIRECT	GO:0051865~	protein autoubiquitination	3.6036	0.00864781	P22681, H7BYG8, Q12933, Q12986	108	76	19333	9.42154	0.999814	0.194379	0.187893	2.06309
GOTERM_BP_DIRECT	GO:0071353~	cellular response to interleukin-4	2.7027	0.00904415	H3BT57, P11802, P49736	108	26	19333	20.6549	0.999875	0.194449	0.187961	2.04363
GOTERM_BP_DIRECT	GO:0000245~	spliceosomal complex assembly	2.7027	0.00904415	A8MUK0, Q15637, A8MTP4, Q15428, F8W6K1, Q99590	108	26	19333	20.6549	0.999875	0.194449	0.187961	2.04363
GOTERM_BP_DIRECT	GO:0051607~	defense response to virus	5.40541	0.00975006	A0A3B3IUA7, Q14258, Q7Z2W4, H3BT57, Q92841, Q9NW08, Q9NQT4	108	234	19333	4.58998	0.999938	0.205166	0.19832	2.01099
GOTERM_BP_DIRECT	GO:0006914~	autophagy	4.5045	0.010141	Q13501, P04637, A0A2R8YDE6, P55072, Q9BRR0, Q9UBN7	108	152	19333	5.88846	0.999958	0.207673	0.200744	1.99392
GOTERM_BP_DIRECT	GO:0032436~	positive regulation of proteasomal ubiquitin-dependent protein catabolic process	3.6036	0.0102892	O75925, Q9Y4X5, P55072, O95376	108	81	19333	8.83996	0.999964	0.207673	0.200744	1.98762
GOTERM_BP_DIRECT	GO:0048340~	paraxial mesoderm morphogenesis	1.8018	0.0110388	P84022, Q15796	108	2	19333	179.009	0.999983	0.218348	0.211062	1.95708
GOTERM_BP_DIRECT	GO:0007026~	negative regulation of microtubule depolymerization	2.7027	0.01271	A0A2R8YDE6, O15344, Q9UBN7, Q92974	108	31	19333	17.3235	0.999997	0.24144	0.233384	1.89585
GOTERM_BP_DIRECT	GO:0006325~	chromatin organization	5.40541	0.0129061	A0A7I2YQA8, Q14839, Q8TDI0, A0A7I2V5F6, Q7LBC6, Q9H7Z6, A0A7I2V5D0, A0A7I2V5F1, A0A7I2V490, F2Z2R5, A0A7I2V311, A0A7I2YQQ0, Q13263, P26358	108	251	19333	4.27911	0.999997	0.24144	0.233384	1.8892
GOTERM_BP_DIRECT	GO:0006298~	mismatch repair	2.7027	0.0135089	P27694, P15927, P35244	108	32	19333	16.7821	0.999999	0.24144	0.233384	1.86938
GOTERM_BP_DIRECT	GO:0042771~	intrinsic apoptotic signaling pathway in response to DNA damage by p53 class mediator	2.7027	0.0135089	Q71UM5, H3BT57, P04637	108	32	19333	16.7821	0.999999	0.24144	0.233384	1.86938
GOTERM_BP_DIRECT	GO:0006357~	regulation of transcription from RNA polymerase II promoter	16.2162	0.0135406	O75925, Q8IWS0, Q14588, Q9Y265, Q9GZU2, P04637, Q969J2, Q7Z5L9, Q14839, A0A3B3IRU6, Q8TDI0, Q7LBC6, Q9BRR0, Q9H2P0, M0QZD4, Q96JP5, P84022, A0A3B3ISL2, Q92841, F2Z2R5, Q15796, A0A0D9SGE8, Q6IQ21	108	1723	19333	1.87009	0.999999	0.24144	0.233384	1.86836
GOTERM_BP_DIRECT	GO:0002181~	cytoplasmic translation	3.6036	0.013671	P61927, P42677, Q8WU90, P61513	108	90	19333	7.95597	0.999999	0.24144	0.233384	1.8642
GOTERM_BP_DIRECT	GO:0006284~	base-excision repair	2.7027	0.0151701	P27694, P15927, P35244	108	34	19333	15.7949	1	0.25993	0.251256	1.81901
GOTERM_BP_DIRECT	GO:0000209~	protein polyubiquitination	4.5045	0.0156666	P22681, Q9Y4X5, A0A2R8YDE6, Q9Y508, O95376, Q9UBN7	108	173	19333	5.17368	1	0.25993	0.251256	1.80502
GOTERM_BP_DIRECT	GO:0006401~	RNA catabolic process	2.7027	0.0160321	Q9NQT4, Q9NQT5, Q15024	108	35	19333	15.3437	1	0.25993	0.251256	1.79501
GOTERM_BP_DIRECT	GO:0045930~	negative regulation of mitotic cell cycle	2.7027	0.0160321	P84022, H3BT57, P00533	108	35	19333	15.3437	1	0.25993	0.251256	1.79501
GOTERM_BP_DIRECT	GO:0070059~	intrinsic apoptotic signaling pathway in response to endoplasmic reticulum stress	2.7027	0.0160321	Q12933, H3BT57, P04637	108	35	19333	15.3437	1	0.25993	0.251256	1.79501
GOTERM_BP_DIRECT	GO:0050790~	regulation of catalytic activity	6.30631	0.0184145	Q96S55, Q9H0H5, P52594, P11802, Q96EY1, P09874, Q92974	108	377	19333	3.32378	1	0.293741	0.28394	1.73484
GOTERM_BP_DIRECT	GO:0051098~	regulation of binding	1.8018	0.0219569	P84022, Q15796	108	4	19333	89.5046	1	0.334083	0.322935	1.65843
GOTERM_BP_DIRECT	GO:0034502~	protein localization to chromosome	1.8018	0.0219569	P27694, P15927	108	4	19333	89.5046	1	0.334083	0.322935	1.65843
GOTERM_BP_DIRECT	GO:0045006~	DNA deamination	1.8018	0.0219569	Q9NQT4, Q9NQT5	108	4	19333	89.5046	1	0.334083	0.322935	1.65843
GOTERM_BP_DIRECT	GO:0042307~	positive regulation of protein import into nucleus	2.7027	0.0236456	H7BZM7, P84022, Q13263	108	43	19333	12.489	1	0.354326	0.342503	1.62625
GOTERM_BP_DIRECT	GO:0070534~	protein K63-linked ubiquitination	2.7027	0.0257397	Q96JP5, Q12933, O95376	108	45	19333	11.934	1	0.379948	0.36727	1.5894
GOTERM_BP_DIRECT	GO:0010628~	positive regulation of gene expression	7.20721	0.0266703	A0A7I2YQA8, P04637, A0A7I2V5F6, P13631, P51610, A0A7I2V5D0, A0A7I2V5F1, H7BZM7, Q7Z570, A0A7I2V490, P84022, Q15796, A0A7I2V311, A0A7I2YQQ0, P26358	108	525	19333	2.72776	1	0.387896	0.374953	1.57397
GOTERM_BP_DIRECT	GO:0043066~	negative regulation of apoptotic process	7.20721	0.027887	P31689, O75925, P22681, Q14192, P84022, P04637, Q96EY1, P00533	108	530	19333	2.70203	1	0.399714	0.386377	1.5546
GOTERM_BP_DIRECT	GO:0045739~	positive regulation of DNA repair	2.7027	0.0301434	Q9Y265, P00533, Q13263	108	49	19333	10.9598	1	0.425883	0.411673	1.52081
GOTERM_BP_DIRECT	GO:0043504~	mitochondrial DNA repair	1.8018	0.0327555	P04637, P09874	108	6	19333	59.6698	1	0.437773	0.423166	1.48472
GOTERM_BP_DIRECT	GO:0070842~	aggresome assembly	1.8018	0.0327555	A0A2R8YDE6, P55072, Q9UBN7	108	6	19333	59.6698	1	0.437773	0.423166	1.48472
GOTERM_BP_DIRECT	GO:0043045~	DNA methylation involved in embryo development	1.8018	0.0327555	A0A7I2V490, A0A7I2YQA8, A0A7I2V5F6, A0A7I2V311, A0A7I2YQQ0, A0A7I2V5D0, Q13263, P26358, A0A7I2V5F1	108	6	19333	59.6698	1	0.437773	0.423166	1.48472
GOTERM_BP_DIRECT	GO:0000389~	mRNA 3'-splice site recognition	1.8018	0.0327555	Q15637, Q15428	108	6	19333	59.6698	1	0.437773	0.423166	1.48472
GOTERM_BP_DIRECT	GO:1902895~	positive regulation of pri-miRNA transcription from RNA polymerase II promoter	2.7027	0.0336278	P84022, P04637, P00533	108	52	19333	10.3275	1	0.443439	0.428643	1.4733
GOTERM_BP_DIRECT	GO:0030308~	negative regulation of cell growth	3.6036	0.0342033	Q13642, P84022, H3BT57, P04637	108	128	19333	5.59404	1	0.445092	0.430241	1.46593
GOTERM_BP_DIRECT	GO:0090398~	cellular senescence	2.7027	0.0360339	H3BT57, P04637, Q96EY1	108	54	19333	9.94496	1	0.448012	0.433063	1.44329
GOTERM_BP_DIRECT	GO:0009408~	response to heat	2.7027	0.0360339	P31689, O60884, Q96EY1	108	54	19333	9.94496	1	0.448012	0.433063	1.44329
GOTERM_BP_DIRECT	GO:0043065~	positive regulation of apoptotic process	5.40541	0.0373193	P31689, Q13501, P04637, P11802, Q96EY1, P13631	108	332	19333	3.23511	1	0.448012	0.433063	1.42807
GOTERM_BP_DIRECT	GO:0071035~	nuclear polyadenylation-dependent rRNA catabolic process	1.8018	0.0381105	Q9NQT5, Q15024	108	7	19333	51.1455	1	0.448012	0.433063	1.41896
GOTERM_BP_DIRECT	GO:0071051~	polyadenylation-dependent snoRNA 3'-end processing	1.8018	0.0381105	Q9NQT4, Q9NQT5	108	7	19333	51.1455	1	0.448012	0.433063	1.41896
GOTERM_BP_DIRECT	GO:0007182~	common-partner SMAD protein phosphorylation	1.8018	0.0381105	H3BT57, Q15796	108	7	19333	51.1455	1	0.448012	0.433063	1.41896
GOTERM_BP_DIRECT	GO:0007183~	SMAD protein complex assembly	1.8018	0.0381105	P84022, Q15796	108	7	19333	51.1455	1	0.448012	0.433063	1.41896
GOTERM_BP_DIRECT	GO:0071038~	nuclear polyadenylation-dependent tRNA catabolic process	1.8018	0.0381105	Q9NQT5, Q15024	108	7	19333	51.1455	1	0.448012	0.433063	1.41896
GOTERM_BP_DIRECT	GO:0031397~	negative regulation of protein ubiquitination	2.7027	0.0385046	P31689, Q13501, P26368	108	56	19333	9.58978	1	0.448012	0.433063	1.41449
GOTERM_BP_DIRECT	GO:1903078~	positive regulation of protein localization to plasma membrane	2.7027	0.0397636	Q13501, Q9C0B5, P00533	108	57	19333	9.42154	1	0.457281	0.442023	1.40051
GOTERM_BP_DIRECT	GO:0048146~	positive regulation of fibroblast proliferation	2.7027	0.0410381	H3BT57, P11802, P00533	108	58	19333	9.2591	1	0.466513	0.450947	1.38681
GOTERM_BP_DIRECT	GO:0022008~	neurogenesis	2.7027	0.0436327	P13010, P00533, Q9H7Z6	108	60	19333	8.95046	1	0.488061	0.471776	1.36019
GOTERM_BP_DIRECT	GO:0008285~	negative regulation of cell proliferation	6.30631	0.044147	P84022, H3BT57, P04637, Q96EY1, Q8TDI0, F2Z2R5, Q15796, P13631	108	464	19333	2.70057	1	0.488061	0.471776	1.3551
GOTERM_BP_DIRECT	GO:0042981~	regulation of apoptotic process	4.5045	0.0444141	Q9Y265, Q12933, P04637, Q96EY1, P55072	108	240	19333	3.72936	1	0.488061	0.471776	1.35248
GOTERM_BP_DIRECT	GO:0038092~	nodal signaling pathway	1.8018	0.0487325	P84022, Q15796	108	9	19333	39.7798	1	0.50733	0.490402	1.31218
GOTERM_BP_DIRECT	GO:0060039~	pericardium development	1.8018	0.0487325	P84022, Q15796	108	9	19333	39.7798	1	0.50733	0.490402	1.31218
GOTERM_BP_DIRECT	GO:0000467~	exonucleolytic trimming to generate mature 3'-end of 5.8S rRNA from tricistronic rRNA transcript (SSU-rRNA, 5.8S rRNA, LSU-rRNA)	1.8018	0.0487325	Q9NQT5, Q15024	108	9	19333	39.7798	1	0.50733	0.490402	1.31218
GOTERM_BP_DIRECT	GO:0048617~	embryonic foregut morphogenesis	1.8018	0.0487325	P84022, Q15796	108	9	19333	39.7798	1	0.50733	0.490402	1.31218
GOTERM_BP_DIRECT	GO:0071028~	nuclear mRNA surveillance	1.8018	0.0487325	Q9NQT4, Q15024	108	9	19333	39.7798	1	0.50733	0.490402	1.31218
GOTERM_BP_DIRECT	GO:0060395~	SMAD protein signal transduction	2.7027	0.0503764	P84022, P02787, Q15796	108	65	19333	8.26197	1	0.518982	0.501665	1.29777
GOTERM_BP_DIRECT	GO:0006915~	apoptotic process	7.20721	0.0515855	Q13501, M0QZD4, Q12933, Q9GZU2, H3BT57, P04637, A0A3B3ISL2, A0A3B3IRU6, P13631, P49736, P09874	108	607	19333	2.35927	1	0.52596	0.50841	1.28747
GOTERM_BP_DIRECT	GO:0090309~	positive regulation of methylation-dependent chromatin silencing	1.8018	0.0644479	A0A7I2V490, A0A7I2YQA8, A0A7I2V5F6, A0A7I2V311, A0A7I2YQQ0, A0A7I2V5D0, Q13263, P26358, A0A7I2V5F1	108	12	19333	29.8349	1	0.643828	0.622345	1.19079
GOTERM_BP_DIRECT	GO:1903800~	positive regulation of production of miRNAs involved in gene silencing by miRNA	1.8018	0.0644479	P04637, P00533	108	12	19333	29.8349	1	0.643828	0.622345	1.19079
GOTERM_BP_DIRECT	GO:0043484~	regulation of RNA splicing	2.7027	0.0694777	P52597, Q5BKZ1, A0A0A0MRN4, Q5VZF2	108	78	19333	6.88497	1	0.668573	0.646265	1.15815
GOTERM_BP_DIRECT	GO:0051974~	negative regulation of telomerase activity	1.8018	0.069629	H3BT57, P04637	108	13	19333	27.5399	1	0.668573	0.646265	1.15721
GOTERM_BP_DIRECT	GO:0042769~	DNA damage response, detection of DNA damage	1.8018	0.069629	P31689, P09874	108	13	19333	27.5399	1	0.668573	0.646265	1.15721
GOTERM_BP_DIRECT	GO:1900095~	regulation of dosage compensation by inactivation of X chromosome	1.8018	0.069629	P51610, Q9H7Z6	108	13	19333	27.5399	1	0.668573	0.646265	1.15721
GOTERM_BP_DIRECT	GO:0006457~	protein folding	3.6036	0.0703454	P31689, P49792, O60884, Q96EY1	108	172	19333	4.16301	1	0.668958	0.646637	1.15276
GOTERM_BP_DIRECT	GO:0043984~	histone H4-K16 acetylation	1.8018	0.0747817	P51610, Q9H7Z6	108	14	19333	25.5728	1	0.691206	0.668143	1.1262
GOTERM_BP_DIRECT	GO:0006978~	DNA damage response, signal transduction by p53 class mediator resulting in transcription of p21 class mediator	1.8018	0.0747817	Q71UM5, P04637	108	14	19333	25.5728	1	0.691206	0.668143	1.1262
GOTERM_BP_DIRECT	GO:0030174~	regulation of DNA-dependent DNA replication initiation	1.8018	0.0747817	Q96S55, P49736	108	14	19333	25.5728	1	0.691206	0.668143	1.1262
GOTERM_BP_DIRECT	GO:0060347~	heart trabecula formation	1.8018	0.0799061	Q14192, Q9GZT9	108	15	19333	23.8679	1	0.705599	0.682055	1.09742
GOTERM_BP_DIRECT	GO:0010035~	response to inorganic substance	1.8018	0.0799061	P04637, Q9H2P0	108	15	19333	23.8679	1	0.705599	0.682055	1.09742
GOTERM_BP_DIRECT	GO:0000028~	ribosomal small subunit assembly	1.8018	0.0799061	P42677, Q71UM5	108	15	19333	23.8679	1	0.705599	0.682055	1.09742
GOTERM_BP_DIRECT	GO:0031053~	primary miRNA processing	1.8018	0.0799061	P84022, Q15796	108	15	19333	23.8679	1	0.705599	0.682055	1.09742
GOTERM_BP_DIRECT	GO:0033120~	positive regulation of RNA splicing	1.8018	0.0799061	H7BZM7, P26368	108	15	19333	23.8679	1	0.705599	0.682055	1.09742
GOTERM_BP_DIRECT	GO:0043981~	histone H4-K5 acetylation	1.8018	0.0850023	P51610, Q9H7Z6	108	16	19333	22.3762	1	0.72288	0.698759	1.07057
GOTERM_BP_DIRECT	GO:2000767~	positive regulation of cytoplasmic translation	1.8018	0.0850023	Q9NZI8, D6RAT4, P62633	108	16	19333	22.3762	1	0.72288	0.698759	1.07057
GOTERM_BP_DIRECT	GO:0043982~	histone H4-K8 acetylation	1.8018	0.0850023	P51610, Q9H7Z6	108	16	19333	22.3762	1	0.72288	0.698759	1.07057
GOTERM_BP_DIRECT	GO:0016075~	rRNA catabolic process	1.8018	0.0850023	Q9NQT4, Q15024	108	16	19333	22.3762	1	0.72288	0.698759	1.07057
GOTERM_BP_DIRECT	GO:0051028~	mRNA transport	2.7027	0.0855176	F8WEA1, P49792, Q16629, Q9NZI8, C9JAB2, A0A0B4J1Z1	108	88	19333	6.10259	1	0.72288	0.698759	1.06794
GOTERM_BP_DIRECT	GO:0007265~	Ras protein signal transduction	2.7027	0.0888491	A0A7I2V490, A0A7I2YQA8, P04637, A0A7I2V5F6, A0A7I2V311, A0A7I2YQQ0, A0A7I2V5D0, Q13263, P26358, A0A7I2V5F1	108	90	19333	5.96698	1	0.736197	0.711633	1.05135
GOTERM_BP_DIRECT	GO:0042059~	negative regulation of epidermal growth factor receptor signaling pathway	1.8018	0.0900707	P22681, P00533	108	17	19333	21.0599	1	0.736197	0.711633	1.04542
GOTERM_BP_DIRECT	GO:0032206~	positive regulation of telomere maintenance	1.8018	0.0900707	Q96QC0, H3BT57	108	17	19333	21.0599	1	0.736197	0.711633	1.04542
GOTERM_BP_DIRECT	GO:0046328~	regulation of JNK cascade	1.8018	0.0900707	Q12933, P00533	108	17	19333	21.0599	1	0.736197	0.711633	1.04542
GOTERM_BP_DIRECT	GO:0048384~	retinoic acid receptor signaling pathway	1.8018	0.0951112	H3BT57, P13631	108	18	19333	19.8899	1	0.762692	0.737243	1.02177
GOTERM_BP_DIRECT	GO:0007250~	activation of NF-kappaB-inducing kinase activity	1.8018	0.0951112	Q96JP5, Q12933	108	18	19333	19.8899	1	0.762692	0.737243	1.02177
GOTERM_BP_DIRECT	GO:0000724~	double-strand break repair via homologous recombination	2.7027	0.0956256	P27694, P15927, P35244	108	94	19333	5.71306	1	0.762692	0.737243	1.01943
GOTERM_BP_DIRECT	GO:0050731~	positive regulation of peptidyl-tyrosine phosphorylation	2.7027	0.0973425	P04637, Q9H2P0, Q92974	108	95	19333	5.65292	1	0.770174	0.744475	1.0117
GOTERM_BP_DIRECT	GO:0010629~	negative regulation of gene expression	4.5045	0.0984931	A0A7I2V490, A0A7I2YQA8, P84022, Q14839, A0A7I2V5F6, Q15796, A0A7I2V311, A0A7I2YQQ0, A0A7I2V5D0, Q9H2P0, P26358, A0A7I2V5F1	108	316	19333	2.83242	1	0.773093	0.747297	1.00659

## Sheet: Human KEGG
Category	Term	Column1	%	PValue	Genes	List Total	Pop Hits	Pop Total	Fold Enrichment	Bonferroni	Benjamini	FDR	Negativelog10
KEGG_PATHWAY	hsa05203:	Viral carcinogenesis	7.20721	0.000740676	Q5T4S7, Q12933, P04637, P49023, P11802, A0A2R8YDE6, Q14839, A0A0A0MSW0, Q96EY1, Q9UBN7	62	204	8205	5.18975	0.0971972	0.102213	0.0940658	3.13037
KEGG_PATHWAY	hsa03030:	DNA replication	3.6036	0.00234458	P27694, P15927, P35244, P49736	62	36	8205	14.7043	0.276701	0.109462	0.100736	2.62993
KEGG_PATHWAY	hsa05212:	Pancreatic cancer	4.5045	0.0023796	P84022, P04637, P11802, P00533, Q15796	62	76	8205	8.70649	0.280196	0.109462	0.100736	2.6235
KEGG_PATHWAY	hsa03460:	Fanconi anemia pathway	3.6036	0.00740945	P27694, P15927, Q9BXW9, P35244	62	54	8205	9.80287	0.641674	0.255626	0.23525	2.13021
KEGG_PATHWAY	hsa03430:	Mismatch repair	2.7027	0.0124419	P27694, P15927, P35244	62	23	8205	17.2616	0.822318	0.283919	0.261288	1.90511
KEGG_PATHWAY	hsa04110:	Cell cycle	4.5045	0.0144842	P84022, P04637, P11802, Q15796, P49736	62	127	8205	5.21019	0.866471	0.283919	0.261288	1.83911
KEGG_PATHWAY	hsa05014:	Amyotrophic lateral sclerosis	7.20721	0.0177304	F8WEA1, Q13501, P49792, Q16629, Q12933, P04637, C9JAB2, A0A2R8YDE6, P43243, P55072, Q9UBN7, A0A0B4J1Z1	62	364	8205	2.90854	0.91531	0.283919	0.261288	1.75128
KEGG_PATHWAY	hsa05220:	Chronic myeloid leukemia	3.6036	0.0187187	P22681, P84022, P04637, P11802	62	76	8205	6.9652	0.926294	0.283919	0.261288	1.72772
KEGG_PATHWAY	hsa04120:	Ubiquitin mediated proteolysis	4.5045	0.0209634	O75925, F8WEU8, P22681, H3BT57, Q9UBF6, O15344	62	142	8205	4.65981	0.946265	0.283919	0.261288	1.67854
KEGG_PATHWAY	hsa03040:	Spliceosome	4.5045	0.0234625	F8WEA1, Q16629, Q7RTV0, Q15428, C9JAB2, P09234, P26368, A0A0B4J1Z1	62	147	8205	4.50132	0.962237	0.283919	0.261288	1.62963
KEGG_PATHWAY	hsa05210:	Colorectal cancer	3.6036	0.0258687	P84022, P04637, P00533, Q15796	62	86	8205	6.15529	0.973133	0.283919	0.261288	1.58723
KEGG_PATHWAY	hsa04218:	Cellular senescence	4.5045	0.0284031	Q13501, P84022, P04637, P11802, Q15796	62	156	8205	4.24163	0.981246	0.283919	0.261288	1.54663
KEGG_PATHWAY	hsa05160:	Hepatitis C	4.5045	0.0289876	O75925, Q12933, P04637, P11802, P00533	62	157	8205	4.21461	0.982741	0.283919	0.261288	1.53779
KEGG_PATHWAY	hsa05165:	Human papillomavirus infection	6.30631	0.035544	Q5T4S7, P04637, P49023, P11802, Q12986, Q14839, A0A0A0MSW0, P00533	62	331	8205	2.7987	0.993224	0.283919	0.261288	1.44923
KEGG_PATHWAY	hsa05225:	Hepatocellular carcinoma	4.5045	0.0358926	P84022, P04637, P11802, P00533, Q15796	62	168	8205	3.93865	0.993554	0.283919	0.261288	1.44499
KEGG_PATHWAY	hsa05131:	Shigellosis	5.40541	0.0360126	Q13501, Q12933, P04637, P49023, P00533, Q92974	62	247	8205	3.21471	0.993664	0.283919	0.261288	1.44354
KEGG_PATHWAY	hsa05219:	Bladder cancer	2.7027	0.0370329	P04637, P11802, P00533	62	41	8205	9.68332	0.994525	0.283919	0.261288	1.43141
KEGG_PATHWAY	hsa03440:	Homologous recombination	2.7027	0.0370329	P27694, P15927, P35244	62	41	8205	9.68332	0.994525	0.283919	0.261288	1.43141
KEGG_PATHWAY	hsa05200:	Pathways in cancer	8.10811	0.0417013	P22681, Q12933, P84022, H3BT57, P04637, P11802, P00533, Q15796, Q9GZT9	62	531	8205	2.24303	0.9972	0.302883	0.27874	1.37985
KEGG_PATHWAY	hsa03420:	Nucleotide excision repair	2.7027	0.0474625	P27694, P15927, P35244	62	47	8205	8.44715	0.998782	0.327491	0.301387	1.32365
KEGG_PATHWAY	hsa05205:	Proteoglycans in cancer	4.5045	0.0655811	P22681, P04637, P49023, P00533, Q15796	62	205	8205	3.22777	0.999914	0.430962	0.39661	1.18322
KEGG_PATHWAY	hsa05163:	Human cytomegalovirus infection	4.5045	0.0857021	Q12933, P04637, P49023, P11802, P00533	62	225	8205	2.94086	0.999996	0.510513	0.46982	1.06701
KEGG_PATHWAY	hsa05171:	Coronavirus disease - COVID-19	4.5045	0.0933883	P61927, P42677, Q71UM5, P00533, P61513	62	232	8205	2.85213	0.999999	0.510513	0.46982	1.02971
KEGG_PATHWAY	hsa04520:	Adherens junction	2.7027	0.0975589	P84022, P00533, O60716	62	71	8205	5.59178	0.999999	0.510513	0.46982	1.01073
KEGG_PATHWAY	hsa05226:	Gastric cancer	3.6036	0.0987887	P84022, P04637, P00533, Q15796	62	149	8205	3.55272	0.999999	0.510513	0.46982	1.00529
KEGG_PATHWAY	hsa05223:	Non-small cell lung cancer	2.7027	0.099883	P04637, P11802, P00533	62	72	8205	5.51411	1	0.510513	0.46982	1.00051
KEGG_PATHWAY	hsa05218:	Melanoma	2.7027	0.099883	P04637, P11802, P00533	62	72	8205	5.51411	1	0.510513	0.46982	1.00051
