# Supplementary material for: Mining proteomes for zinc finger persulfidation
Source: Royal Society of Chemistry journal article supplement (doi:10.1039/d3cb00106g), 2024-01-01
Supplement: d3cb00106g5.xlsx [file d3cb00106g5.xlsx]

## Sheet: MICE GO MF
Category	Term	Column1	%	PValue	Genes	List Total	Pop Hits	Pop Total	Fold Enrichment	Bonferroni	Benjamini	FDR	NegativeLog10
GOTERM_MF_DIRECT	GO:0046872~	Metal ion binding	98.7903	9.26048e-171	Q3KNM2, Q922J3, P52431, Q8BL97, P62915, P13864, Q3TYX3, Q8VCM3, Q9WUB0, O08550, Q9QWH1, Q7TPH6, Q99PP9, Q61687, Q9D115, Q9CR50, O70481, P59997, Q99LG0, Q8R2V5, Q8K1Y2, Q7TMA2, Q3TIX9, Q9QXK2, A2CE44, Q7TQ95, Q9Z2V5, Q3U3I9, Q91X58, Q922H1, Q8R5K2, Q91W36, Q9Z1T6, Q9ET26, O89090, P97447, Q922H9, Q61097, Q99M87, Q8BMJ7, Q8CFI7, Q9WVF7, Q9DBR1, Q9EPJ9, Q9DBR0, Q62511, Q61545, Q924K8, Q3UHD9, O70585,…	248	3616	18541	5.06546	3.3523e-168	3.3523e-168	3.0467e-168	170.033
GOTERM_MF_DIRECT	GO:0008270~	Zinc ion binding	38.3065	1.10123e-65	Q3KNM2, Q62203, Q80SY4, Q80UY2, Q922J3, Q8BL97, Q8BFR6, P97386, P10711, Q9QXA7, P62915, P56399, Q925H1, Q62241, P13864, P97868, Q3UHH1, Q8BHJ9, Q6A009, Q9EPU0, Q1PSW8, O08550, Q8VDF2, Q7TPH6, Q9QWH1, Q9QVN7, P62878, P49698, Q2MHN3, Q99PP9, Q8K310, P60898, Q61048, Q9ESN6, Q9D554, Q60953, Q9WTU0, O88291, Q9R0Q1, Q9CR50, Q8VHR5, O70481, P59997, Q9Z1K5, Q6WKZ8, P11531, Q99LG0, Q8C7Q4, Q3TIX9, P47708,…	248	768	18541	9.24792	3.98645e-63	1.99322e-63	1.81152e-63	64.9581
GOTERM_MF_DIRECT	GO:0061630~	Ubiquitin protein ligase activity	19.3548	1.05938e-34	Q61510, Q3KNM2, Q9CY62, Q80UY2, B1AUE5, Q9QXA7, Q9DBY1, Q91YL2, Q3U319, Q9ET26, Q8BFX1, A2AN08, P97868, Q9QZR0, Q6A009, Q99MP8, Q9JM13, Q1PSW8, Q9QXP6, Q8VDF2, Q7TPH6, Q8BJL1, P62878, Q9CQJ4, Q8K3X4, Q8R307, Q9ESN6, Q6ZQM0, Q9CR50, O08759, O70481, Q80TP3, Q8CH72, Q5U430, Q9R049, Q9Z1K5, Q6WKZ8, Q9Z1K6, Q8BU04, O35730, Q9QXK2, B1AY10, Q9WTZ1, Q71FD5, Q8BVW3, P22682, Q9JIY2, E9Q555	248	331	18541	10.8416	3.83497e-32	1.27832e-32	1.16179e-32	33.9749
GOTERM_MF_DIRECT	GO:0016740~	Transferase activity	31.8548	2.131e-22	Q61510, Q3KNM2, Q80SY4, Q80UY2, P52431, Q9DBY1, P62915, Q9ERU9, Q9Z277, Q3U319, Q8R5A0, P13864, P97868, Q3TYX3, Q9QZR0, P70700, Q9WUB0, Q6A009, Q1PSW8, O08550, Q8VDF2, Q7TPH6, Q6PDK2, P62878, Q99PP9, Q3TX08, Q9ESN6, Q6ZQM0, Q9CR50, O08759, O70481, Q9R049, P70336, Q9Z1K5, P70335, Q6WKZ8, Q9Z1K6, Q8K1Y2, Q9QXK2, Q71FD5, P20444, E9Q555, Q9CY62, Q922H1, Q9Z1T6, P55200, Q91YL2, Q7TT50, Q9ET26, Q8BFX1,…	248	1772	18541	3.33307	7.71423e-20	1.92856e-20	1.75275e-20	21.6714
GOTERM_MF_DIRECT	GO:0004842~	Ubiquitin-protein transferase activity	12.0968	5.47868e-19	Q61510, Q80SY4, Q9CY62, Q3U319, Q8BFX1, A2AN08, P97868, Q9QZR0, Q9WUB0, Q6A009, Q99MP8, Q1PSW8, Q8VDF2, P62878, Q9CQJ4, Q62511, Q9ESN6, Q60953, Q62318, O08759, O70481, P63280, Q80TP3, Q8CH72, Q5U430, Q9R049, Q9Z1K5, Q9Z1K6, P22682, E9Q555	248	253	18541	8.86507	1.98328e-16	3.96656e-17	3.60497e-17	18.2613
GOTERM_MF_DIRECT	GO:0005515~	Protein binding	52.4194	1.24852e-14	Q922J3, Q8BL97, P62915, Q3U319, Q925H1, P13864, Q9D883, Q3TYX3, P70700, Q9WUB0, O88737, Q9EPU0, Q1PSW8, Q8VDF2, Q9QWH1, Q7TPH6, P62878, Q8R307, Q61048, Q61687, Q80U70, Q64318, Q60875, Q9R0Q1, O70481, Q61164, Q6PDQ2, Q6WKZ8, Q9Z1K6, Q99LG0, Q9QXK2, Q9WTZ1, Q9Z2V5, P20444, Q91X58, Q922H1, Q8R5K2, Q9Z1T6, P55200, Q7TT50, Q3UKC1, P97447, O89090, Q61097, Q9WTJ4, A2AN08, Q62101, Q99M87, Q99MP8, Q00899,…	248	5382	18541	1.80585	4.50129e-12	7.53271e-13	6.84603e-13	13.9036
GOTERM_MF_DIRECT	GO:0003677~	DNA binding	26.2097	4.74174e-13	Q61116, P52431, P97386, P10711, A2A8L1, P62915, Q925H1, Q8K0L9, Q5F293, P13864, P56959, Q08288, P70700, Q9ERU3, Q9EPU0, O08550, Q8VDF2, Q9QWH1, Q9QVN7, P22893, P49698, Q2MHN3, Q99PP9, Q61687, Q64318, Q60953, P97310, O88291, P59997, E9QAM5, Q61164, Q6PDQ2, Q9QXK2, Q3U3I9, Q91X20, Q8C4A5, Q8K2R5, P55200, P11103, O89090, Q64321, Q8K4B0, Q9DCH6, Q9JM13, O88878, Q00899, Q8CFI7, P41230, Q9WVF7, Q9DBR1,…	248	1850	18541	2.62678	1.71652e-10	2.45216e-11	2.22862e-11	12.3241
GOTERM_MF_DIRECT	GO:0003676~	Nucleic acid binding	12.5	1.39039e-10	Q62203, Q8BL97, P52431, P10711, Q62241, Q9D883, P97868, Q91YE7, Q99MP8, Q8VDF2, Q9QVN7, Q9WVF7, Q2MHN3, Q9DBR1, Q8K310, P60898, Q61048, Q61545, Q9D554, P33609, Q6NZN0, Q9CYA6, Q64213, P53996, Q99KG3, Q8C7Q4, B1AY10, Q91VY9, Q9DB42, P26369, A2A6A1	248	569	18541	4.07315	5.03322e-08	6.29153e-09	5.71799e-09	9.85686
GOTERM_MF_DIRECT	GO:0043130~	Ubiquitin binding	5.24194	6.26815e-09	Q64337, Q91X58, P56399, Q3UKC1, Q80TP3, Q8CH72, Q9R049, Q8K3K8, Q9WUB0, Q99LG0, P60670, Q9Z2V5, Q99LI8	248	97	18541	10.0197	2.26907e-06	2.52119e-07	2.29136e-07	8.20286
GOTERM_MF_DIRECT	GO:0003682~	Chromatin binding	11.2903	7.50239e-09	Q8C4A5, P52431, A2A8L1, P55200, P11103, P13864, P56959, Q8K4B0, Q9EPU0, Q9QXP6, Q00899, Q8CFI7, Q9QWH1, P49698, Q9CQJ4, Q9WVF7, Q9DBR0, Q80U70, Q61687, Q64318, Q924K8, P33609, Q62318, Q9Z103, Q61164, Q6PDQ2, O35730, Q9R190	248	557	18541	3.75824	2.71586e-06	2.71586e-07	2.46829e-07	8.1248
GOTERM_MF_DIRECT	GO:0003723~	RNA binding	14.5161	3.22997e-08	Q8BL97, Q9ERU9, Q62241, P13864, P56959, Q9D883, Q91YE7, P23949, Q9EPU0, Q1PSW8, Q00899, Q8BGJ9, Q6ZWU9, A2RSY6, Q9DBR1, Q8K310, Q61048, Q3TX08, Q80U70, Q61545, Q9D554, Q3UPF5, Q6NZN0, Q9R020, Q6ZWY3, Q9CYA6, Q80TP3, Q8CH72, E9QAM5, Q64213, Q99KG3, Q8R151, Q8C7Q4, Q9JJ48, Q8BJ05, P26369	248	936	18541	2.87547	1.16924e-05	1.06295e-06	9.66055e-07	7.4908
GOTERM_MF_DIRECT	GO:0003713~	Transcription coactivator activity	6.45161	8.34521e-07	Q61510, Q924K8, Q60953, Q9WTU0, Q62318, O08759, Q8CH72, Q9WTJ4, P56959, Q8K4B0, Q9WUB0, Q99LG0, Q6PDK2, A2CE44, Q8BVW3, Q9R190	248	240	18541	4.98414	0.000302051	2.51747e-05	2.28798e-05	6.07856
GOTERM_MF_DIRECT	GO:0003712~	Transcription cofactor activity	4.83871	2.27061e-06	O70433, Q61103, Q64337, Q6ZPY7, Q61545, Q9WTU0, A2CE44, P59997, P56959, Q9R059, Q5SVQ0, Q9R190	248	137	18541	6.5485	0.000821622	6.32276e-05	5.74638e-05	5.64386
GOTERM_MF_DIRECT	GO:0042826~	histone deacetylase binding	4.43548	2.22532e-05	Q924K8, A2A8L1, P11103, O89090, Q9Z2V5, Q64321, P13864, Q6PDQ2, Q8K4B0, Q9R190, Q9DBR0	248	143	18541	5.75093	0.00802337	0.000575403	0.000522949	4.65261
GOTERM_MF_DIRECT	GO:0042393~	histone binding	4.83871	4.13742e-05	Q61103, Q61687, Q99LG0, Q91W36, P97310, Q8VDF2, A2A8L1, Q9Z277, Q6PDK2, Q9QWH1, Q5SVQ0, Q6PDQ2	248	186	18541	4.82336	0.0148662	0.000998497	0.000907474	4.38327
GOTERM_MF_DIRECT	GO:0004697~	protein kinase C activity	2.01613	4.93226e-05	Q8K1Y2, Q62074, Q02111, P20444, Q62101	248	16	18541	23.3632	0.0176968	0.00105028	0.000954538	4.30695
GOTERM_MF_DIRECT	GO:0004698~	calcium-dependent protein kinase C activity	2.01613	4.93226e-05	Q8K1Y2, Q62074, Q02111, P20444, Q62101	248	16	18541	23.3632	0.0176968	0.00105028	0.000954538	4.30695
GOTERM_MF_DIRECT	GO:0030628~	pre-mRNA 3'-splice site binding	1.6129	7.85813e-05	Q8BHJ9, Q8BGJ9, Q9D883, P26369	248	7	18541	42.7212	0.0280467	0.00158036	0.00143629	4.10468
GOTERM_MF_DIRECT	GO:0031593~	polyubiquitin binding	2.41935	0.000123986	Q91X58, Q8VHH5, Q9QXK2, Q9Z2V5, Q8K3K8, Q9DCH6	248	37	18541	12.1236	0.0438931	0.00236225	0.00214691	3.90663
GOTERM_MF_DIRECT	GO:0031267~	small GTPase binding	5.64516	0.000136259	Q8R5K2, Q60875, Q9ERU9, Q7TT50, Q9R0Q1, Q8K3K8, P70336, P70335, Q68FF6, Q9JM13, Q9JLQ2, P47708, Q7TPH6, Q810B6	248	288	18541	3.63427	0.0481324	0.0024663	0.00224147	3.86563
GOTERM_MF_DIRECT	GO:0005096~	GTPase activator activity	5.24194	0.000155757	Q3UHD9, Q9ERU9, Q9D8S3, Q8BXK8, Q60790, Q68FF6, Q9WVM1, Q8VHH5, Q8R2V5, Q9JLQ2, Q99K28, Q91VZ6, Q9EPJ9	248	253	18541	3.84153	0.054828	0.00268495	0.00244019	3.80755
GOTERM_MF_DIRECT	GO:0031625~	ubiquitin protein ligase binding	5.64516	0.00046642	Q64337, Q60953, Q6ZQM0, Q62318, Q3U319, Q3UJD6, P70347, Q9Z1K5, P63037, P60670, Q9QXK2, P62878, Q9Z2V5, P62983	248	327	18541	3.20082	0.155393	0.00767473	0.0069751	3.33122
GOTERM_MF_DIRECT	GO:0061629~	RNA polymerase II sequence-specific DNA binding transcription factor binding	4.43548	0.000592771	Q924K8, P41230, P62878, P11103, O89090, P49698, Q9WTJ4, Q6PDQ2, Q99M87, Q8K4B0, Q9R190	248	213	18541	3.86095	0.193174	0.0093297	0.0084792	3.22711
GOTERM_MF_DIRECT	GO:0016779~	nucleotidyltransferase activity	3.22581	0.000679287	Q8BZ20, P52431, Q8CFI7, P33609, Q8C1B2, P11103, Q9WVF7, P70700	248	110	18541	5.43724	0.218066	0.0102459	0.0093119	3.16795
GOTERM_MF_DIRECT	GO:0000993~	RNA polymerase II core binding	2.01613	0.000728884	P62915, O88291, Q9Z199, Q8R5A0, P63271	248	31	18541	12.0584	0.23199	0.0105542	0.00959212	3.13734
GOTERM_MF_DIRECT	GO:0005545~	1-phosphatidylinositol binding	1.6129	0.000762652	Q810J8, Q8R2V5, Q8BL66, E9Q4P1	248	14	18541	21.3606	0.241328	0.0106185	0.00965048	3.11767
GOTERM_MF_DIRECT	GO:0035198~	miRNA binding	2.01613	0.0017531	Q99KG3, Q8C7Q4, Q1PSW8, E9QAM5, Q8K310	248	39	18541	9.58488	0.47016	0.0235046	0.0213619	2.75619
GOTERM_MF_DIRECT	GO:0004843~	thiol-dependent ubiquitin-specific protease activity	2.82258	0.00220961	Q99LG0, Q91W36, Q8R5K2, P56399, Q3TIX9, Q3UJD6, P70347	248	100	18541	5.23335	0.551015	0.0285671	0.025963	2.65568
GOTERM_MF_DIRECT	GO:0019789~	SUMO transferase activity	1.6129	0.00260127	Q60953, Q62318, Q9ERU9, P63280	248	21	18541	14.2404	0.610498	0.0313886	0.0285273	2.58481
GOTERM_MF_DIRECT	GO:0042800~	histone methyltransferase activity (H3-K4 specific)	1.6129	0.00260127	O08550, P55200, Q6PDK2, Q91X20	248	21	18541	14.2404	0.610498	0.0313886	0.0285273	2.58481
GOTERM_MF_DIRECT	GO:0008168~	methyltransferase activity	3.62903	0.00321182	Q3TX08, Q922H1, O08550, P55200, Q6PDK2, P13864, Q8R5A0, Q3TYX3, A2RSY6	248	183	18541	3.67682	0.687937	0.0375057	0.0340867	2.49325
GOTERM_MF_DIRECT	GO:0003950~	NAD+ ADP-ribosyltransferase activity	1.6129	0.00384393	Q8BZ20, Q3UPF5, Q8C1B2, P11103	248	24	18541	12.4603	0.751965	0.0434845	0.0395204	2.41522
GOTERM_MF_DIRECT	GO:0001221~	transcription cofactor binding	2.01613	0.0043797	P63280, O89090, P49698, Q61164, Q6PDQ2	248	50	18541	7.47621	0.795857	0.048044	0.0436643	2.35856
GOTERM_MF_DIRECT	GO:0045322~	unmethylated CpG binding	1.20968	0.00598241	O08550, P55200, P59997	248	9	18541	24.9207	0.886066	0.0636951	0.0578886	2.22312
GOTERM_MF_DIRECT	GO:0001222~	transcription corepressor binding	2.01613	0.00615956	Q80U70, O88737, Q9Z2V5, P49698, Q9QYX7	248	55	18541	6.79655	0.893185	0.0637074	0.0578998	2.21045
GOTERM_MF_DIRECT	GO:0000987~	core promoter proximal region sequence-specific DNA binding	2.41935	0.00674903	Q00899, Q8VDF2, Q8C1B2, O89090, Q64321, P49698	248	89	18541	5.04014	0.91383	0.0678652	0.0616786	2.17076
GOTERM_MF_DIRECT	GO:0004386~	helicase activity	2.82258	0.0076772	Q8R151, Q61687, Q9EPU0, P97310, A2A8L1, E9QAM5, Q6PDQ2	248	129	18541	4.05686	0.938571	0.0751121	0.0682649	2.1148
GOTERM_MF_DIRECT	GO:0034450~	ubiquitin-ubiquitin ligase activity	1.20968	0.00898075	P62878, Q80TP3, Q9R049	248	11	18541	20.3897	0.96183	0.0855535	0.0777544	2.04669
GOTERM_MF_DIRECT	GO:0001227~	transcriptional repressor activity, RNA polymerase II transcription regulatory region sequence-specific binding	4.83871	0.00969331	Q8K2R5, Q9JJ48, Q64318, Q3URU2, Q61624, Q00899, Q925H1, B1AY10, Q8K0L9, Q5F293, Q61164, Q9ERU3	248	363	18541	2.47147	0.97058	0.0899738	0.0817718	2.01353
GOTERM_MF_DIRECT	GO:0044877~	macromolecular complex binding	7.25806	0.0102482	Q64337, Q924K8, Q3UHD9, Q9ERU9, Q7TT50, Q3U319, Q9CWY9, Q99M87, P11531, Q68FF6, Q9EPU0, Q9JLQ2, P60670, P47708, Q9QXK2, P22893, P62878, P49698	248	685	18541	1.96455	0.975983	0.0927465	0.0842917	1.98935
GOTERM_MF_DIRECT	GO:1990404~	protein ADP-ribosylase activity	1.20968	0.0187562	Q8BZ20, Q8C1B2, P11103	248	16	18541	14.0179	0.998945	0.165603	0.150507	1.72686
GOTERM_MF_DIRECT	GO:0032452~	histone demethylase activity	1.20968	0.0210726	Q9WTU0, P41230, P59997	248	17	18541	13.1933	0.999552	0.178598	0.162317	1.67628
GOTERM_MF_DIRECT	GO:1990841~	promoter-specific chromatin binding	2.01613	0.0212147	Q80U70, Q91W36, P62915, Q62318, P13864	248	79	18541	4.73178	0.999575	0.178598	0.162317	1.67336
GOTERM_MF_DIRECT	GO:0072518~	Rho-dependent protein serine/threonine kinase activity	0.806452	0.0264669	P70336, P70335	248	2	18541	74.7621	0.999939	0.21775	0.1979	1.5773
GOTERM_MF_DIRECT	GO:0003729~	mRNA binding	3.62903	0.0298183	P23949, Q91YE7, Q8C7Q4, P22893, Q6NZF1, Q99L45, Q62241, Q64213, P53996	248	272	18541	2.47375	0.999983	0.237932	0.216242	1.52552
GOTERM_MF_DIRECT	GO:0043565~	sequence-specific DNA binding	5.24194	0.0302345	Q80U70, Q64318, Q61624, Q924K8, Q925H1, Q8VHR5, O89090, Q5F293, Q61164, Q8K4B0, Q00899, P49698, Q9R190	248	486	18541	1.99981	0.999985	0.237932	0.216242	1.5195
GOTERM_MF_DIRECT	GO:0003678~	DNA helicase activity	1.6129	0.0335874	Q61687, P97310, A2A8L1, Q6PDQ2	248	53	18541	5.64242	0.999996	0.253189	0.230108	1.47382
GOTERM_MF_DIRECT	GO:0003887~	DNA-directed DNA polymerase activity	1.20968	0.0342714	P52431, P33609, Q9WVF7	248	22	18541	10.1948	0.999997	0.253189	0.230108	1.46507
GOTERM_MF_DIRECT	GO:0003688~	DNA replication origin binding	1.20968	0.0342714	P97310, P33609, Q5SVQ0	248	22	18541	10.1948	0.999997	0.253189	0.230108	1.46507
GOTERM_MF_DIRECT	GO:0032549~	ribonucleoside binding	0.806452	0.0394375	Q8CFI7, P70700	248	3	18541	49.8414	1	0.285528	0.259499	1.40409
GOTERM_MF_DIRECT	GO:0070530~	K63-linked polyubiquitin binding	1.20968	0.0402453	Q64337, P60670, Q8K3K8	248	24	18541	9.34526	1	0.285663	0.259622	1.39528
GOTERM_MF_DIRECT	GO:0019901~	protein kinase binding	5.64516	0.0429501	Q64337, Q6ZQM0, Q3UHD9, P33609, Q80YV2, P11103, Q5F293, Q61097, P97868, Q99M87, Q9WVM1, P22893, Q8BVW3, P22682	248	571	18541	1.83305	1	0.296217	0.269214	1.36704
GOTERM_MF_DIRECT	GO:0008327~	methyl-CpG binding	1.20968	0.0433688	Q8VDF2, Q5F293, P13864	248	25	18541	8.97145	1	0.296217	0.269214	1.36282
GOTERM_MF_DIRECT	GO:0003714~	transcription corepressor activity	2.82258	0.0465792	O70433, Q924K8, Q62318, Q8K3X4, E9Q1P8, Q8K4B0, Q9R190	248	195	18541	2.68377	1	0.312253	0.283788	1.33181
GOTERM_MF_DIRECT	GO:0031369~	translation initiation factor binding	1.20968	0.0498741	Q99L45, Q8CH72, Q62384	248	27	18541	8.3069	1	0.326025	0.296304	1.30212
GOTERM_MF_DIRECT	GO:0061663~	NEDD8 ligase activity	0.806452	0.052236	Q9WTZ1, P62878	248	4	18541	37.381	1	0.326025	0.296304	1.28203
GOTERM_MF_DIRECT	GO:0004809~	tRNA (guanine-N2-)-methyltransferase activity	0.806452	0.052236	Q3TX08, A2RSY6	248	4	18541	37.381	1	0.326025	0.296304	1.28203
GOTERM_MF_DIRECT	GO:0071535~	RING-like zinc finger domain binding	0.806452	0.052236	P63280, Q9CQJ4	248	4	18541	37.381	1	0.326025	0.296304	1.28203
GOTERM_MF_DIRECT	GO:0017022~	myosin binding	1.20968	0.0602363	Q9ESN6, Q8CH72, P11531	248	30	18541	7.47621	1	0.369585	0.335894	1.22014
GOTERM_MF_DIRECT	GO:0004674~	protein serine/threonine kinase activity	4.43548	0.0629176	Q9Z1T6, Q7TT50, Q8K1Y2, P04627, Q62074, Q61097, Q02111, P70336, P20444, P70335, Q62101	248	430	18541	1.91252	1	0.378858	0.344321	1.20123
GOTERM_MF_DIRECT	GO:0003899~	DNA-directed 5'-3' RNA polymerase activity	1.20968	0.0638407	Q8CFI7, P60898, P70700	248	31	18541	7.23504	1	0.378858	0.344321	1.1949
GOTERM_MF_DIRECT	GO:0030971~	receptor tyrosine kinase binding	1.6129	0.0667405	P22682, Q9WTJ4, Q62384, Q99M87	248	70	18541	4.27212	1	0.383799	0.348812	1.17561
GOTERM_MF_DIRECT	GO:0043425~	bHLH transcription factor binding	1.20968	0.0675159	O70433, P63280, O89090	248	32	18541	7.00895	1	0.383799	0.348812	1.17059
GOTERM_MF_DIRECT	GO:0030674~	protein binding, bridging	2.01613	0.067854	Q64337, Q0P678, Q9R049, Q8K3K8, Q8R307	248	115	18541	3.25053	1	0.383799	0.348812	1.16842
GOTERM_MF_DIRECT	GO:0000976~	transcription regulatory region sequence-specific DNA binding	3.22581	0.0741236	Q61624, Q00899, Q6PDK2, Q8K0L9, O89090, P49698, Q61164, Q91X20	248	273	18541	2.19083	1	0.405596	0.368622	1.13004
GOTERM_MF_DIRECT	GO:0051059~	NF-kappaB binding	1.20968	0.0750689	Q99M87, Q9QZR0, Q9DBR0	248	34	18541	6.59666	1	0.405596	0.368622	1.12454
GOTERM_MF_DIRECT	GO:0070615~	nucleosome-dependent ATPase activity	1.20968	0.0750689	Q61687, A2A8L1, Q6PDQ2	248	34	18541	6.59666	1	0.405596	0.368622	1.12454
GOTERM_MF_DIRECT	GO:0070087~	chromo shadow domain binding	0.806452	0.0773258	Q61687, Q62318	248	6	18541	24.9207	1	0.40568	0.368698	1.11168
GOTERM_MF_DIRECT	GO:0070728~	leucine binding	0.806452	0.0773258	O70481, Q6WKZ8	248	6	18541	24.9207	1	0.40568	0.368698	1.11168
GOTERM_MF_DIRECT	GO:0003690~	double-stranded DNA binding	2.41935	0.0795476	Q9WUB0, Q64318, Q61624, P33609, O89090, Q9DBR0	248	172	18541	2.60798	1	0.411375	0.373874	1.09937
GOTERM_MF_DIRECT	GO:0031624~	ubiquitin conjugating enzyme binding	1.20968	0.0868688	Q3U319, Q9Z1K5, Q9Z1K6	248	37	18541	6.06179	1	0.442909	0.402533	1.06114
GOTERM_MF_DIRECT	GO:0031072~	heat shock protein binding	1.6129	0.0911508	P63037, Q9QYJ0, P22893, Q99M87	248	80	18541	3.7381	1	0.458286	0.416509	1.04024
GOTERM_MF_DIRECT	GO:0051087~	chaperone binding	2.01613	0.0980594	P63037, Q9DBY1, Q9QYJ0, Q61097, Q9R049	248	131	18541	2.85352	1	0.486267	0.441939	1.00851

## Sheet: MICE GO CC
Category	Term	Column1	%	PValue	Genes	List Total	Pop Hits	Pop Total	Fold Enrichment	Bonferroni	Benjamini	FDR	NegativeLog10
GOTERM_CC_DIRECT	GO:0005634~	Nucleus	70.1613	1.49576e-39	Q922J3, Q8BL97, P52431, P62915, Q3U319, Q9CWY9, Q925H1, P13864, Q62241, Q9D883, P97868, Q08288, P70700, Q8BHJ9, P23949, Q9EPU0, O08550, Q8VDF2, Q9QWH1, Q7TPH6, Q9QVN7, P62878, Q2MHN3, Q61048, Q61687, Q80U70, Q64318, Q9D115, O88291, Q6ZWY3, Q9CR50, P59997, E9QAM5, Q61164, Q6PDQ2, Q9Z1K5, Q6WKZ8, Q9WVM1, Q9Z1K6, Q99LG0, Q3TIX9, Q7TMA2, Q9QXK2, A2CE44, Q9WTZ1, Q9Z2V5, P20444, Q3U3I9, Q8K2R5, Q91W36,…	242	6477	21038	2.33542	5.26506e-37	5.26506e-37	4.8612e-37	38.8251
GOTERM_CC_DIRECT	GO:0005654~	nucleoplasm	45.5645	6.71953e-28	Q8BL97, P52431, P62915, Q3U319, Q9CWY9, Q925H1, P13864, Q62241, Q9D883, Q08288, P70700, Q8BHJ9, Q9EPU0, Q8VDF2, Q9QWH1, Q7TPH6, Q9QVN7, P62878, Q61687, Q80U70, Q64318, O88291, Q9CR50, P59997, E9QAM5, Q61164, Q6PDQ2, Q9Z1K5, Q9WVM1, Q9Z1K6, Q8K1Y2, Q3TIX9, Q9QXK2, Q9WTZ1, Q7TQ95, Q9Z2V5, Q71FD5, Q8R5K2, Q91W36, P55200, O89090, Q922H9, A2AN08, Q99MP8, Q8BMJ7, Q00899, P41230, Q8CFI7, Q9CQJ4, Q9WVF7,…	242	3468	21038	2.83262	2.36528e-25	1.18264e-25	1.09192e-25	27.1727
GOTERM_CC_DIRECT	GO:0005737~	Cytoplasm	57.2581	1.40558e-13	Q922J3, Q8BL97, Q9QXA7, Q9CWY9, P13864, P97868, Q08288, Q8BHJ9, P23949, O88737, Q9EPU0, Q1PSW8, Q7TPH6, P62878, Q99PP9, Q9DAZ9, Q61687, Q9D115, Q60875, Q6ZQM0, Q9CR50, O70481, E9QAM5, Q6PDQ2, Q9Z1K5, Q6WKZ8, Q9WVM1, Q9Z1K6, Q8R2V5, Q8K1Y2, Q9QXK2, Q9WTZ1, Q9Z2V5, Q71FD5, P20444, E9Q555, Q91X58, Q922H1, Q8R5K2, Q91W36, Q7TT50, Q9ET26, P97447, O89090, Q61097, Q9WTJ4, A2AN08, Q62101, Q99M87, Q99MP8,…	242	7429	21038	1.66168	4.94751e-11	1.64922e-11	1.52271e-11	12.8521
GOTERM_CC_DIRECT	GO:0000151~	Ubiquitin ligase complex	5.64516	1.60567e-10	Q9DBY1, Q3U319, Q9CR50, O70481, Q5U430, Q9R049, Q9Z1K5, Q6WKZ8, Q9Z1K6, Q9WUB0, Q99MP8, O35730, P62878, Q9CQJ4	242	102	21038	11.9321	5.65195e-08	1.41299e-08	1.3046e-08	9.79434
GOTERM_CC_DIRECT	GO:0005829~	Cytosol	35.4839	5.78024e-09	Q61510, Q80UY2, P52431, A2A8L1, P56399, Q3U319, Q5F293, Q8R5A0, P70347, Q9QZR0, Q68FF6, P70700, Q3UHH1, Q8BHJ9, O88737, Q6A009, Q9EPU0, Q7TPH6, P22893, P62878, P49698, Q99PP9, Q9D0D5, Q64318, Q3UPF5, Q6ZQM0, Q60953, Q6ZWY3, Q9CR50, O08759, O70481, Q9R049, P70336, Q8C7Q4, Q8BP48, Q8K1Y2, P47708, Q9WTZ1, Q9Z2V5, P20444, P61514, E9Q555, E9Q4P1, Q922H1, Q9Z1T6, P55200, Q91YL2, Q9D8S3, Q8BXK8, Q9ET26,…	242	4241	21038	1.80386	2.03464e-06	4.06929e-07	3.75716e-07	8.23805
GOTERM_CC_DIRECT	GO:0000785~	Chromatin	8.46774	1.84465e-07	Q61103, Q6ZPY7, Q91W36, P97310, Q60953, A2A8L1, P33609, Q62318, Q925H1, O89090, P11103, P59997, Q9WTJ4, Q6PDQ2, Q6WKZ8, Q9EPU0, Q00899, Q8VDF2, Q9QXK2, P49698, Q9DBR0	242	439	21038	4.15857	6.49296e-05	1.08219e-05	9.99185e-06	6.73409
GOTERM_CC_DIRECT	GO:0016607~	Nuclear speck	8.06452	5.58871e-07	Q61048, Q62203, Q8BL97, Q9D554, A2A8L1, Q0P678, Q9JIB4, Q9CR50, Q8VHR5, Q9D883, P97868, Q8BHJ9, Q99KG3, Q8C7Q4, O35730, Q8BGJ9, Q8BIJ7, Q8BJ05, Q9JIY2, P26369	242	428	21038	4.06233	0.000196703	2.81032e-05	2.59476e-05	6.25269
GOTERM_CC_DIRECT	GO:0016581~	NuRD complex	2.41935	1.04662e-06	Q924K8, A2A8L1, Q8VHR5, Q6PDQ2, Q8K4B0, Q9R190	242	17	21038	30.6825	0.000368343	4.60513e-05	4.2519e-05	5.98021
GOTERM_CC_DIRECT	GO:0005730~	Nucleolus	11.6935	1.49123e-06	P10711, Q9Z277, Q9JMD0, P11103, Q922H9, Q62384, P97868, Q08288, P70700, Q9JM13, Q8BW10, Q9DBR1, P60898, Q9DBR0, Q80U70, Q62511, Q61545, Q60953, Q9WTU0, P33609, Q61164, Q99KG3, Q8C7Q4, B1AY10, Q8BJ05, Q91VY9, Q9DB42, E9Q555, E9Q4P1	242	894	21038	2.82	0.000524774	5.83235e-05	5.38498e-05	5.82646
GOTERM_CC_DIRECT	GO:0005681~	Spliceosomal complex	4.83871	6.54188e-06	Q61048, Q8BHJ9, Q62203, Q91YE7, Q9D554, Q3TIX9, Q8BGJ9, Q9CYA6, Q62241, Q9D883, Q64213, P26369	242	177	21038	5.89382	0.0023001	0.000230274	0.000212611	5.1843
GOTERM_CC_DIRECT	GO:0000792~	Heterochromatin	3.22581	9.38582e-06	Q61687, Q60953, Q8VDF2, A2A8L1, Q62318, Q9QWH1, P13864, Q9CQJ4	242	65	21038	10.6996	0.00329837	0.000300346	0.000277308	5.02753
GOTERM_CC_DIRECT	GO:0016604~	Nuclear body	6.45161	1.26975e-05	Q61510, Q80U70, Q61687, P62915, Q9Z277, Q9CYA6, Q8K0L9, P63280, P11103, Q5F293, Q64213, Q9Z1K5, Q9JJ48, O35730, Q9QXK2, Q9CQJ4	242	348	21038	3.99696	0.00445957	0.000372459	0.00034389	4.89628
GOTERM_CC_DIRECT	GO:0089701~	U2AF	1.6129	5.02285e-05	Q8BGJ9, Q9D883, Q64213, P26369	242	7	21038	49.6765	0.0175255	0.00136003	0.00125571	4.29905
GOTERM_CC_DIRECT	GO:0000781~	Chromosome, telomeric region	3.62903	0.000129072	Q61687, Q9EPU0, P52431, Q60953, Q8CFI7, Q8VHR5, Q91XU0, Q6PDQ2, Q9R190	242	130	21038	6.0185	0.0444196	0.00324525	0.00299632	3.88917
GOTERM_CC_DIRECT	GO:0005768~	endosome	8.06452	0.000750664	Q64337, Q60953, Q6ZQM0, Q3UHD9, Q9Z1T6, Q9R0Q1, Q62074, Q8K3K8, Q68FF6, Q8VCM3, Q9JM13, Q91WB4, Q8VDC1, Q8BIJ7, Q71FD5, Q8R307, Q99LI8, Q8BL66, Q810B6, E9Q4P1	242	727	21038	2.39158	0.232282	0.0176156	0.0162644	3.12455
GOTERM_CC_DIRECT	GO:0016235~	aggresome	2.01613	0.000913107	Q64337, P52431, Q9Z2V5, Q02111, Q9DBR1	242	38	21038	11.4387	0.274983	0.0200883	0.0185475	3.03948
GOTERM_CC_DIRECT	GO:0005776~	autophagosome	2.41935	0.00124994	Q810J8, Q64337, Q3URU2, Q8VDC1, Q8K3K8, Q8R307	242	70	21038	7.45148	0.356128	0.0258812	0.023896	2.90311
GOTERM_CC_DIRECT	GO:0000791~	euchromatin	2.41935	0.00141852	Q9JJ48, Q8VDF2, Q62318, O89090, Q9CQJ4, Q91X20	242	72	21038	7.24449	0.393271	0.0277399	0.0256122	2.84816
GOTERM_CC_DIRECT	GO:0016605~	PML body	2.82258	0.00161042	Q64337, Q61687, Q8VHH5, Q60953, Q9CWY9, P63280, Q99PP9	242	109	21038	5.58291	0.43296	0.0298352	0.0275467	2.79306
GOTERM_CC_DIRECT	GO:0001739~	sex chromatin	1.20968	0.0019017	Q80U70, O35730, Q9CQJ4	242	6	21038	43.4669	0.488309	0.0334699	0.0309026	2.72086
GOTERM_CC_DIRECT	GO:0005694~	chromosome	6.45161	0.00251197	Q80U70, Q61687, P97310, Q9WTU0, P62915, Q9JMD0, P11103, Q5F293, Q922H9, P59997, Q61164, Q5SVQ0, P97868, Q6WKZ8, P70700, Q9CQJ4	242	570	21038	2.44025	0.58742	0.0421054	0.0388757	2.59999
GOTERM_CC_DIRECT	GO:0032993~	protein-DNA complex	2.01613	0.00275265	Q80U70, P62915, P11103, O89090, Q6PDQ2	242	51	21038	8.52293	0.621019	0.0440425	0.0406642	2.56025
GOTERM_CC_DIRECT	GO:0010494~	cytoplasmic stress granule	2.41935	0.0035979	Q61510, Q8R151, Q8C7Q4, Q8BFR6, P22893, P70335	242	89	21038	5.86071	0.718816	0.0531724	0.0490939	2.44395
GOTERM_CC_DIRECT	GO:0015030~	Cajal body	2.01613	0.00362539	Q9JJ48, Q61545, Q62241, Q62384, Q9Z1K5	242	55	21038	7.90308	0.721533	0.0531724	0.0490939	2.44064
GOTERM_CC_DIRECT	GO:0016363~	nuclear matrix	2.82258	0.00403972	Q60953, Q00899, Q8VDF2, P33609, O88291, Q8K310, Q9DBR0	242	131	21038	4.64532	0.759458	0.0547337	0.0505353	2.39365
GOTERM_CC_DIRECT	GO:0031519~	PcG protein complex	1.6129	0.00435381	Q00899, O35730, Q9QWH1, Q9CQJ4	242	29	21038	11.9909	0.784736	0.0547337	0.0505353	2.36113
GOTERM_CC_DIRECT	GO:0060077~	inhibitory synapse	1.6129	0.00435381	O88737, O70585, Q9QYX7, Q68FF6	242	29	21038	11.9909	0.784736	0.0547337	0.0505353	2.36113
GOTERM_CC_DIRECT	GO:0035097~	histone methyltransferase complex	1.6129	0.00435381	O08550, P55200, Q6PDK2, Q91X20	242	29	21038	11.9909	0.784736	0.0547337	0.0505353	2.36113
GOTERM_CC_DIRECT	GO:0031466~	Cul5-RING ubiquitin ligase complex	1.20968	0.00553506	Q9WTZ1, P62878, Q9Z1K6	242	10	21038	26.0802	0.858259	0.0671841	0.0620308	2.25688
GOTERM_CC_DIRECT	GO:0005669~	transcription factor TFIID complex	1.6129	0.00576295	P10711, P62915, Q9JIB4, Q9D0D5	242	32	21038	10.8667	0.869244	0.0676186	0.062432	2.23936
GOTERM_CC_DIRECT	GO:0090543~	Flemming body	1.6129	0.00683712	Q91W36, Q3UHD9, Q9WVM1, Q9DAZ9	242	34	21038	10.2275	0.910626	0.0776344	0.0716795	2.16513
GOTERM_CC_DIRECT	GO:0000793~	condensed chromosome	1.6129	0.00932138	P62915, Q9Z277, Q61164, Q9DBR0	242	38	21038	9.15094	0.962988	0.102535	0.0946702	2.03052
GOTERM_CC_DIRECT	GO:0035102~	PRC1 complex	1.20968	0.0141082	O35730, Q9QWH1, Q9CQJ4	242	16	21038	16.3001	0.993272	0.141888	0.131005	1.85053
GOTERM_CC_DIRECT	GO:0071004~	U2-type prespliceosome	1.20968	0.0141082	Q62203, Q62241, P26369	242	16	21038	16.3001	0.993272	0.141888	0.131005	1.85053
GOTERM_CC_DIRECT	GO:0031461~	cullin-RING ubiquitin ligase complex	1.20968	0.0141082	Q3UHH1, Q9WTZ1, P62878	242	16	21038	16.3001	0.993272	0.141888	0.131005	1.85053
GOTERM_CC_DIRECT	GO:0032991~	macromolecular complex	7.66129	0.0203467	Q60875, Q0P678, Q62318, Q3U319, Q925H1, P11103, Q61097, Q80TP3, P13864, Q9R049, P70347, Q6PDQ2, P97868, P11531, Q99KG3, P47708, Q71FD5, Q9Z2V5, P20444	242	926	21038	1.78374	0.99928	0.198945	0.183685	1.69151
GOTERM_CC_DIRECT	GO:0048471~	perinuclear region of cytoplasm	6.85484	0.0264085	Q8R5K2, Q9Z1T6, Q80TP3, Q9R049, P56959, Q62384, Q8K3K8, Q9QYX7, P11531, Q810J8, Q8C7Q4, Q9EPU0, P63037, Q91XU0, Q9Z2V5, P22682, P20444	242	817	21038	1.80891	0.999919	0.245098	0.226297	1.57826
GOTERM_CC_DIRECT	GO:0031410~	cytoplasmic vesicle	7.25806	0.0267518	Q64337, Q80SY4, Q922J3, Q60875, Q6ZQM0, Q9Z1T6, Q9R0Q1, Q8K3K8, Q8VCM3, Q9WVM1, O88737, Q8VDF2, Q8VDC1, P47708, Q8BVW3, Q8R307, Q8BL66, Q810B6	242	886	21038	1.76615	0.999928	0.245098	0.226297	1.57265
GOTERM_CC_DIRECT	GO:0071013~	catalytic step 2 spliceosome	2.01613	0.0271557	Q8BHJ9, Q62203, Q9D554, Q9CYA6, Q9D883	242	99	21038	4.3906	0.999938	0.245098	0.226297	1.56614
GOTERM_CC_DIRECT	GO:0032044~	DSIF complex	0.806452	0.0339758	Q9Z199, P63271	242	3	21038	57.9559	0.999995	0.298987	0.276053	1.46883
GOTERM_CC_DIRECT	GO:0005657~	replication fork	1.20968	0.0433207	Q8VDF2, Q9QXK2, P13864	242	29	21038	8.99316	1	0.365312	0.337291	1.3633
GOTERM_CC_DIRECT	GO:0098793~	presynapse	3.22581	0.0446456	O88737, Q9JLQ2, P47708, Q9D8S3, Q8R307, P62983, Q6ZWU9, P61514	242	282	21038	2.46621	1	0.365312	0.337291	1.35022
GOTERM_CC_DIRECT	GO:0097413~	Lewy body	0.806452	0.0450436	Q64337, Q9Z1K5	242	4	21038	43.4669	1	0.365312	0.337291	1.34637
GOTERM_CC_DIRECT	GO:0031901~	early endosome membrane	2.41935	0.045664	Q91WB4, Q60953, Q9Z1T6, Q8BIJ7, Q99LI8, Q8BL66	242	169	21038	3.08641	1	0.365312	0.337291	1.34043
GOTERM_CC_DIRECT	GO:0071339~	MLL1 complex	1.20968	0.0488866	P55200, Q9CQJ4, Q91X20	242	31	21038	8.41296	1	0.382402	0.35307	1.31081
GOTERM_CC_DIRECT	GO:0044305~	calyx of Held	1.20968	0.0517615	Q9JLQ2, P20444, Q68FF6	242	32	21038	8.15005	1	0.387661	0.357925	1.28599
GOTERM_CC_DIRECT	GO:0000428~	DNA-directed RNA polymerase complex	1.20968	0.0517615	Q8CFI7, P60898, P70700	242	32	21038	8.15005	1	0.387661	0.357925	1.28599
GOTERM_CC_DIRECT	GO:0005721~	pericentric heterochromatin	1.20968	0.0546954	Q61687, Q9Z277, P13864	242	33	21038	7.90308	1	0.390561	0.360603	1.26205
GOTERM_CC_DIRECT	GO:0019898~	extrinsic component of membrane	1.6129	0.0549522	O88737, P47708, Q3U319, Q9R0Q1	242	75	21038	4.63647	1	0.390561	0.360603	1.26002
GOTERM_CC_DIRECT	GO:0000243~	commitment complex	0.806452	0.0559852	Q62241, P26369	242	5	21038	34.7736	1	0.390561	0.360603	1.25193
GOTERM_CC_DIRECT	GO:0005813~	centrosome	4.83871	0.056587	Q61103, Q80SY4, Q8R5K2, Q922J3, Q9QVN7, Q9QXK2, P70336, Q6PDQ2, A2AN08, P97868, Q68FF6, Q9DAZ9	242	557	21038	1.8729	1	0.390561	0.360603	1.24728
GOTERM_CC_DIRECT	GO:0043231~	intracellular membrane-bounded organelle	8.46774	0.0631571	Q61103, Q64337, Q924K8, Q9Z1T6, Q9ERU9, O88291, Q9CR50, Q61097, Q99M87, Q8K4B0, Q8BHJ9, P63037, Q8BMJ7, Q8R2V5, Q8VDC1, Q7TPH6, Q8BIJ7, Q71FD5, Q99LI8, Q810B6, E9Q4P1	242	1208	21038	1.51127	1	0.427525	0.394732	1.19958
GOTERM_CC_DIRECT	GO:0014069~	postsynaptic density	3.62903	0.0730444	Q80SY4, O88737, Q60875, O70585, Q6ZWU9, Q9EPJ9, Q9QYX7, P11531, Q68FF6	242	381	21038	2.05356	1	0.483091	0.446036	1.13641
GOTERM_CC_DIRECT	GO:0043025~	neuronal cell body	5.24194	0.0741106	Q8R5K2, Q60875, Q9Z103, P13864, Q9R049, P56959, Q62384, Q8K3K8, Q9QYX7, P11531, O88737, Q9Z2V5, P20444	242	654	21038	1.72804	1	0.483091	0.446036	1.13012
GOTERM_CC_DIRECT	GO:0031463~	Cul3-RING ubiquitin ligase complex	1.20968	0.0767436	Q3UHH1, P62878, Q9Z1K5	242	40	21038	6.52004	1	0.487112	0.449749	1.11496
GOTERM_CC_DIRECT	GO:0048788~	cytoskeleton of presynaptic active zone	0.806452	0.0774951	O88737, Q9QYX7	242	7	21038	24.8383	1	0.487112	0.449749	1.11073
GOTERM_CC_DIRECT	GO:0098685~	Schaffer collateral - CA1 synapse	2.01613	0.0856515	O88737, Q62074, P70336, P70335, Q8BL66	242	145	21038	2.99772	1	0.516656	0.477026	1.06726
GOTERM_CC_DIRECT	GO:0036513~	Derlin-1 retrotranslocation complex	0.806452	0.0880664	Q9DBY1, Q9R049	242	8	21038	21.7335	1	0.516656	0.477026	1.05519
GOTERM_CC_DIRECT	GO:0044354~	macropinosome	0.806452	0.0880664	Q922J3, Q810B6	242	8	21038	21.7335	1	0.516656	0.477026	1.05519
GOTERM_CC_DIRECT	GO:0044665~	MLL1/2 complex	0.806452	0.0880664	O08550, Q91X20	242	8	21038	21.7335	1	0.516656	0.477026	1.05519
GOTERM_CC_DIRECT	GO:0000118~	histone deacetylase complex	1.20968	0.0903915	Q6ZPY7, Q9Z2V5, Q9R190	242	44	21038	5.92731	1	0.521603	0.481594	1.04387
GOTERM_CC_DIRECT	GO:0005635~	nuclear envelope	2.41935	0.0923469	Q922J3, P33609, Q9ERU9, P63280, P11103, Q8K4B0	242	208	21038	2.50771	1	0.524292	0.484077	1.03458

## Sheet: MICE GO BP
Category	Term	Column1	%	PValue	Genes	List Total	Pop Hits	Pop Total	Fold Enrichment	Bonferroni	Benjamini	FDR	NegativeLog10
GOTERM_BP_DIRECT	GO:0006511~	Ubiquitin-dependent protein catabolic process	12.0968	2.32379e-19	Q61510, Q80SY4, Q8R5K2, Q91W36, Q9DBY1, P56399, Q91YL2, Q3U319, Q9ET26, A2AN08, P97868, Q8VDF2, P60670, P62878, Q6ZQM0, Q3UJD6, Q9CR50, O08759, O70481, Q8CH72, Q5U430, Q9R049, Q9Z1K5, Q6WKZ8, Q9Z1K6, Q99LG0, Q9WTZ1, Q9Z2V5, P22682, E9Q555	242	270	19984	9.17539	3.35787e-16	3.35787e-16	3.2626e-16	18.6338
GOTERM_BP_DIRECT	GO:0016567~	Protein ubiquitination	13.7097	3.37845e-17	Q80SY4, Q9CY62, Q80UY2, Q9QXA7, Q9DBY1, Q9ET26, Q8BFX1, A2AN08, P97868, Q9QZR0, Q3UHH1, Q6A009, Q99MP8, Q9QXP6, Q8VDF2, Q7TPH6, P62878, Q8R307, Q9CR50, O08759, O70481, Q80TP3, Q8CH72, Q5U430, Q9R049, Q9Z1K5, Q6WKZ8, Q9Z1K6, Q9WTZ1, Q8BVW3, P22682, P62983, Q9JIY2, E9Q555	242	438	19984	6.4102	4.88186e-14	2.44093e-14	2.37167e-14	16.4713
GOTERM_BP_DIRECT	GO:0006325~	Chromatin organization	10.8871	5.61647e-14	Q91W36, A2A8L1, P55200, Q9Z277, Q3U319, Q8R5A0, P13864, P63271, O08550, Q8VDF2, P41230, Q6PDK2, Q61103, Q80U70, Q61687, Q6ZPY7, Q9WTU0, Q62318, P59997, Q61164, Q6PDQ2, Q5SVQ0, Q99LG0, O35730, Q9Z2V5, Q9Z199, Q91X20	242	336	19984	6.63577	8.11762e-11	2.70527e-11	2.62851e-11	13.2505
GOTERM_BP_DIRECT	GO:0000122~	Negative regulation of transcription from RNA polymerase II promoter	16.5323	1.79997e-11	O70433, Q8K2R5, Q91W36, A2A8L1, Q925H1, P11103, Q8K0L9, Q5F293, Q64321, Q8R5A0, P13864, P63271, Q99M87, Q08288, Q8K4B0, Q8VDF2, Q00899, P41230, P22893, Q9CQJ4, Q8K3X4, Q80U70, Q64337, Q64318, Q61624, Q924K8, Q62318, Q8VHR5, P63280, Q61164, Q6PDQ2, P53996, Q99KG3, Q9JJ48, Q3URU2, B1AY10, Q8C0Q2, Q9Z2V5, Q9Z199, E9Q1P8, Q9R190	242	995	19984	3.40273	2.60096e-08	6.50238e-09	6.31788e-09	10.7447
GOTERM_BP_DIRECT	GO:0051865~	Protein autoubiquitination	5.24194	1.80515e-10	Q3KNM2, Q9CY62, Q8BFX1, Q9CR50, O08759, Q9R049, Q6A009, Q1PSW8, Q8VDF2, Q9QXK2, B1AY10, P22682, E9Q555	242	79	19984	13.5889	2.60845e-07	5.21689e-08	5.06887e-08	9.74349
GOTERM_BP_DIRECT	GO:0000209~	Protein polyubiquitination	6.45161	5.20811e-09	Q3KNM2, Q9ESN6, Q9ET26, O08759, Q80TP3, Q8CH72, Q9R049, Q9Z1K5, Q9Z1K6, Q9WUB0, Q1PSW8, Q9QXP6, P62878, Q9Z2V5, Q8BVW3, P22682	242	180	19984	7.34031	7.52569e-06	1.25429e-06	1.2187e-06	8.28332
GOTERM_BP_DIRECT	GO:0070936~	Protein K48-linked ubiquitination	4.43548	7.33299e-09	Q6ZQM0, Q91YL2, Q9DBY1, Q8BFX1, P62878, O08759, Q71FD5, Q80TP3, Q9R049, Q8CH72, Q9Z1K6	242	67	19984	13.5577	1.05961e-05	1.51374e-06	1.47079e-06	8.13472
GOTERM_BP_DIRECT	GO:0006397~	mRNA processing	8.46774	2.16227e-08	Q61048, Q62203, Q8BL97, Q9D554, Q91XI1, Q6NZN0, Q9R020, O88291, Q9CYA6, P63271, Q62384, Q64213, Q9D883, P97868, Q8BHJ9, Q91YE7, Q8C7Q4, Q3TIX9, Q9Z199, Q9DBR1, P26369	242	366	19984	4.73811	3.12444e-05	3.90561e-06	3.79479e-06	7.66509
GOTERM_BP_DIRECT	GO:0000398~	mRNA splicing, via spliceosome	5.64516	2.80245e-07	Q61048, Q62203, Q8BL97, Q9D554, Q62241, Q64213, Q9D883, Q8BHJ9, Q99KG3, Q91YE7, Q8C7Q4, Q3TIX9, Q8BGJ9, P26369	242	179	19984	6.45865	0.000404872	4.39246e-05	4.26783e-05	6.55246
GOTERM_BP_DIRECT	GO:0008380~	RNA splicing	6.85484	3.03977e-07	Q61048, Q62203, Q8BL97, Q9D554, Q9R020, O88291, Q9CYA6, P56959, Q62384, Q64213, Q9D883, Q8BHJ9, Q99KG3, Q91YE7, Q8C7Q4, Q3TIX9, P26369	242	279	19984	5.03167	0.00043915	4.39246e-05	4.26783e-05	6.51716
GOTERM_BP_DIRECT	GO:0045892~	Negative regulation of transcription, DNA-templated	10.4839	6.66707e-07	Q925H1, P11103, Q8K0L9, Q5F293, P13864, Q8K4B0, P41230, Q9QWH1, P49698, Q61103, Q9D115, Q64318, Q61624, Q924K8, Q60953, Q62318, Q8VHR5, P63280, Q61164, Q6PDQ2, Q5SVQ0, Q9JJ48, O35730, Q7TMA2, Q8C0Q2, Q9R190	242	673	19984	3.19025	0.000962928	8.7581e-05	8.5096e-05	6.17607
GOTERM_BP_DIRECT	GO:0006338~	Chromatin remodeling	5.24194	1.16765e-06	Q61103, Q61687, Q924K8, A2A8L1, Q9Z277, Q8VHR5, Q6PDQ2, Q8K4B0, Q00899, P41230, O35730, Q9CQJ4, Q9R190	242	171	19984	6.2779	0.00168583	0.000140604	0.000136615	5.93269
GOTERM_BP_DIRECT	GO:0043161~	Proteasome-mediated ubiquitin-dependent protein catabolic process	5.64516	2.88168e-06	Q91X58, Q9ESN6, Q60953, Q6ZQM0, Q91YL2, Q8BFX1, P63280, Q8K4B0, Q9WUB0, Q3UHH1, Q8VHH5, Q1PSW8, P62878, Q71FD5	242	220	19984	5.255	0.00415538	0.00032031	0.000311221	5.54035
GOTERM_BP_DIRECT	GO:2000736~	Regulation of stem cell differentiation	2.41935	3.27241e-06	Q924K8, Q8VHR5, Q3TYX3, Q6PDQ2, Q8K4B0, Q9R190	242	20	19984	24.7736	0.00471748	0.000337759	0.000328176	5.48513
GOTERM_BP_DIRECT	GO:0006974~	cellular response to DNA damage stimulus	8.46774	5.04338e-06	Q61687, Q91W36, P97386, P52431, Q9Z277, Q9JIB4, P11103, Q5F293, Q80TP3, Q5SVQ0, P70347, P97868, Q99LG0, Q00899, Q8VDF2, Q9QXK2, Q91XU0, P62878, P22682, Q9WVF7, Q91X20	242	517	19984	3.35425	0.00726121	0.000485846	0.00047206	5.29728
GOTERM_BP_DIRECT	GO:0006281~	DNA repair	7.25806	5.43923e-06	Q61687, Q91W36, P97386, P52431, Q62318, Q9JIB4, Q9CWY9, P11103, Q80TP3, Q5SVQ0, Q9EPU0, Q00899, Q8VDF2, Q9QXK2, Q91XU0, P62878, Q9WVF7, Q9DBR1	242	389	19984	3.82111	0.0078289	0.00049123	0.000477292	5.26446
GOTERM_BP_DIRECT	GO:0042659~	regulation of cell fate specification	2.01613	1.35424e-05	Q924K8, Q8VHR5, Q6PDQ2, Q8K4B0, Q9R190	242	13	19984	31.761	0.0193787	0.0011511	0.00111844	4.8683
GOTERM_BP_DIRECT	GO:0048511~	rhythmic process	4.43548	1.71738e-05	Q60953, P55200, P41230, Q7TPH6, Q8BGJ9, O08759, O89090, P59997, P49698, P70336, Q8K4B0	242	153	19984	5.93702	0.0245109	0.00137867	0.00133955	4.76513
GOTERM_BP_DIRECT	GO:0045944~	positive regulation of transcription from RNA polymerase II promoter	13.3065	4.27021e-05	Q8C4A5, P10711, P55200, Q9Z277, O89090, P11103, Q64321, Q9WTJ4, P63271, Q62101, Q9WUB0, Q00899, Q6PDK2, Q9QVN7, P49698, Q8K3X4, Q61103, Q62511, Q61687, Q64318, Q60875, Q61624, Q3UHD9, O08759, E9QAM5, Q5SVQ0, P53996, Q99LG0, Q3URU2, Q9Z199, Q91X20, Q9R190, Q9DB42	242	1245	19984	2.18883	0.0598406	0.00324761	0.00315546	4.36955
GOTERM_BP_DIRECT	GO:0006260~	DNA replication	3.62903	0.000111097	Q9EPU0, P97386, P52431, P97310, P33609, Q91XU0, Q5SVQ0, Q9WVF7, P97868	242	121	19984	6.1422	0.14832	0.00802676	0.00779901	3.9543
GOTERM_BP_DIRECT	GO:0016575~	histone deacetylation	2.41935	0.000365716	Q924K8, Q8VHR5, Q9Z2V5, Q6PDQ2, Q8K4B0, Q9R190	242	51	19984	9.71512	0.410545	0.0251647	0.0244507	3.43686
GOTERM_BP_DIRECT	GO:0071596~	ubiquitin-dependent protein catabolic process via the N-end rule pathway	1.20968	0.000431052	O70481, Q5U430, Q6WKZ8	242	3	19984	82.5785	0.463669	0.0272769	0.0265029	3.36547
GOTERM_BP_DIRECT	GO:0000731~	DNA synthesis involved in DNA repair	1.6129	0.000453041	P52431, P33609, Q91XU0, Q9WVF7	242	13	19984	25.4088	0.48045	0.0272769	0.0265029	3.34386
GOTERM_BP_DIRECT	GO:0016574~	histone ubiquitination	1.6129	0.000453041	Q80U70, Q8VDF2, O35730, Q9CQJ4	242	13	19984	25.4088	0.48045	0.0272769	0.0265029	3.34386
GOTERM_BP_DIRECT	GO:0045893~	positive regulation of transcription, DNA-templated	8.46774	0.000564035	Q924K8, Q60953, P10711, Q9QXA7, P55200, Q62318, O88291, Q8BFX1, Q8VHR5, O89090, Q61164, Q6PDQ2, Q8K4B0, P53996, Q99LG0, Q00899, O08550, A2CE44, P49698, Q99PP9, Q9R190	242	729	19984	2.3788	0.557476	0.0326012	0.0316762	3.24869
GOTERM_BP_DIRECT	GO:0051092~	positive regulation of NF-kappaB transcription factor activity	3.62903	0.000702482	Q9WUB0, Q61510, Q60875, Q62074, Q02111, Q8CH72, Q8BVW3, Q62101, Q9QZR0	242	159	19984	4.67426	0.637758	0.0378913	0.0368162	3.15336
GOTERM_BP_DIRECT	GO:1902187~	negative regulation of viral release from host cell	1.6129	0.000708003	Q61510, Q60953, Q62318, Q8CH72	242	15	19984	22.0209	0.640639	0.0378913	0.0368162	3.14996
GOTERM_BP_DIRECT	GO:0006351~	transcription, DNA-templated	3.62903	0.000768238	Q8C4A5, P10711, Q8CFI7, Q9JIB4, Q9QVN7, Q8C9B9, P13864, P60898, P70700	242	161	19984	4.61619	0.670616	0.0396466	0.0385216	3.1145
GOTERM_BP_DIRECT	GO:0061158~	3'-UTR-mediated mRNA destabilization	1.6129	0.00103943	P23949, Q9EPU0, Q1PSW8, P22893	242	17	19984	19.4302	0.777483	0.0517921	0.0503226	2.98321
GOTERM_BP_DIRECT	GO:0035556~	intracellular signal transduction	6.04839	0.00110525	Q60875, Q9Z1T6, Q7TT50, P04627, Q62074, Q61097, Q02111, Q60790, P70336, Q62101, Q9WVM1, Q8K1Y2, B9EJ80, P22893, P20444	242	447	19984	2.77109	0.797694	0.0532364	0.0517258	2.95654
GOTERM_BP_DIRECT	GO:0032259~	methylation	3.62903	0.00146579	Q3TX08, Q922H1, O08550, P55200, Q6PDK2, P13864, Q8R5A0, Q3TYX3, A2RSY6	242	178	19984	4.17532	0.879923	0.0683246	0.066386	2.83393
GOTERM_BP_DIRECT	GO:0042752~	regulation of circadian rhythm	2.41935	0.00156561	Q60953, P41230, O08759, P59997, P49698, P70336	242	70	19984	7.07816	0.896074	0.0706969	0.068691	2.80532
GOTERM_BP_DIRECT	GO:0032922~	circadian regulation of gene expression	2.41935	0.00188714	Q8C7Q4, Q60953, P55200, Q7TPH6, P59997, Q8K4B0	242	73	19984	6.78727	0.934748	0.0826338	0.0802892	2.7242
GOTERM_BP_DIRECT	GO:0002376~	immune system process	6.45161	0.00210858	Q61510, Q64337, Q60875, Q3UPF5, Q60953, P11103, Q02111, Q8K3K8, Q62101, Q08288, Q8R151, Q91XU0, Q8BVW3, Q8K310, Q9DBR0, E9Q555	242	532	19984	2.48356	0.952646	0.0896145	0.0870718	2.67601
GOTERM_BP_DIRECT	GO:0044790~	negative regulation by host of viral release from host cell	1.6129	0.0025665	Q61510, Q60953, Q62318, Q8CH72	242	23	19984	14.3615	0.975605	0.101347	0.0984717	2.59066
GOTERM_BP_DIRECT	GO:0006355~	regulation of transcription, DNA-templated	11.2903	0.00258515	Q8C4A5, Q61116, P10711, P55200, Q925H1, O89090, Q5F293, P56959, P63271, Q8K4B0, Q9ERU3, O08550, Q00899, Q9QVN7, P49698, Q2MHN3, Q61545, Q924K8, Q60953, Q8VHR5, Q02111, Q61164, Q5SVQ0, P11531, Q6P3Y5, B1AY10, Q9Z199, Q9R190	242	1256	19984	1.84092	0.976255	0.101347	0.0984717	2.58752
GOTERM_BP_DIRECT	GO:0006915~	apoptotic process	7.25806	0.00259505	Q61103, Q64337, P97310, Q60953, Q6ZQM0, Q3UHD9, Q3UKC1, P11103, P70335, Q62101, Q99M87, Q9DCH6, Q91YE7, Q9JJ48, Q3URU2, P46718, Q8C9B9, P20444	242	655	19984	2.26933	0.976593	0.101347	0.0984717	2.58585
GOTERM_BP_DIRECT	GO:0007265~	Ras protein signal transduction	2.41935	0.00267138	Q99MP8, Q9JM13, Q62318, Q61097, P13864, Q62101	242	79	19984	6.27179	0.979043	0.101583	0.0987003	2.57327
GOTERM_BP_DIRECT	GO:0051568~	histone H3-K4 methylation	1.6129	0.00290724	O08550, P55200, Q6PDK2, Q91X20	242	24	19984	13.7631	0.98511	0.105575	0.10258	2.53652
GOTERM_BP_DIRECT	GO:0044648~	histone H3-K4 dimethylation	1.20968	0.0029225	O08550, P55200, Q6PDK2	242	7	19984	35.3908	0.985436	0.105575	0.10258	2.53425
GOTERM_BP_DIRECT	GO:0010613~	positive regulation of cardiac muscle hypertrophy	1.6129	0.00327453	P11103, P70336, P20444, P70335	242	25	19984	13.2126	0.991257	0.113772	0.110544	2.48485
GOTERM_BP_DIRECT	GO:0006513~	protein monoubiquitination	2.01613	0.00330687	Q61510, Q91YL2, Q9QXK2, P62878, P22682	242	51	19984	8.09593	0.991657	0.113772	0.110544	2.48058
GOTERM_BP_DIRECT	GO:0071364~	cellular response to epidermal growth factor stimulus	2.01613	0.00354905	P23949, P22893, P22682, Q62384, Q68FF6	242	52	19984	7.94024	0.994128	0.117815	0.114473	2.44989
GOTERM_BP_DIRECT	GO:0071897~	DNA biosynthetic process	1.6129	0.00366899	P97386, P52431, P33609, Q9WVF7	242	26	19984	12.7044	0.995065	0.117815	0.114473	2.43545
GOTERM_BP_DIRECT	GO:0006261~	DNA-dependent DNA replication	1.6129	0.00366899	P52431, Q9CWY9, Q91XU0, Q9WVF7	242	26	19984	12.7044	0.995065	0.117815	0.114473	2.43545
GOTERM_BP_DIRECT	GO:0042307~	positive regulation of protein import into nucleus	2.01613	0.003803	Q62318, Q80TP3, Q02111, Q62384, Q62101	242	53	19984	7.79043	0.995937	0.118591	0.115226	2.41987
GOTERM_BP_DIRECT	GO:0016579~	protein deubiquitination	2.41935	0.00385729	Q99LG0, Q91W36, Q8R5K2, P56399, Q3TIX9, Q3UJD6	242	86	19984	5.76129	0.996245	0.118591	0.115226	2.41372
GOTERM_BP_DIRECT	GO:0006306~	DNA methylation	1.6129	0.00454181	P55200, P13864, Q61164, Q9R190	242	28	19984	11.7969	0.998609	0.136727	0.132848	2.34277
GOTERM_BP_DIRECT	GO:0097692~	histone H3-K4 monomethylation	1.20968	0.00493084	O08550, P55200, Q6PDK2	242	9	19984	27.5262	0.999209	0.145114	0.140997	2.30708
GOTERM_BP_DIRECT	GO:0045815~	positive regulation of gene expression, epigenetic	1.6129	0.00502126	Q9WTU0, P55200, Q5SVQ0, Q91X20	242	29	19984	11.3901	0.999307	0.145114	0.140997	2.29919
GOTERM_BP_DIRECT	GO:0010216~	maintenance of DNA methylation	1.20968	0.00611473	Q8VDF2, P13864, Q61164	242	10	19984	24.7736	0.999858	0.173251	0.168335	2.21362
GOTERM_BP_DIRECT	GO:0034644~	cellular response to UV	2.01613	0.00666072	Q8VHH5, P52431, Q00899, P62878, P11103	242	62	19984	6.65956	0.999936	0.185091	0.179839	2.17648
GOTERM_BP_DIRECT	GO:0045616~	regulation of keratinocyte differentiation	1.20968	0.00741443	P22893, P70336, P70335	242	11	19984	22.5214	0.999979	0.202148	0.196413	2.12992
GOTERM_BP_DIRECT	GO:0006367~	transcription initiation from RNA polymerase II promoter	1.6129	0.00786805	P62915, Q9JIB4, P60898, Q9D0D5	242	34	19984	9.71512	0.999989	0.210543	0.204569	2.10413
GOTERM_BP_DIRECT	GO:0010629~	negative regulation of gene expression	4.83871	0.00874969	Q61624, Q00899, Q7TMA2, Q9Z103, Q8C1B2, Q8K0L9, Q64321, P59997, P13864, Q61164, P70336, Q6PDQ2	242	395	19984	2.50871	0.999997	0.222334	0.216025	2.05801
GOTERM_BP_DIRECT	GO:0030174~	regulation of DNA-dependent DNA replication initiation	1.20968	0.008827	P97310, Q91XU0, Q5SVQ0	242	12	19984	20.6446	0.999997	0.222334	0.216025	2.05419
GOTERM_BP_DIRECT	GO:0070213~	protein auto-ADP-ribosylation	1.20968	0.008827	Q8BZ20, Q8C1B2, P11103	242	12	19984	20.6446	0.999997	0.222334	0.216025	2.05419
GOTERM_BP_DIRECT	GO:0043123~	positive regulation of I-kappaB kinase/NF-kappaB signaling	2.82258	0.00892412	Q9WUB0, Q61510, Q3UPF5, P63280, Q8CH72, Q8BVW3, Q62101	242	147	19984	3.93231	0.999998	0.222334	0.216025	2.04943
GOTERM_BP_DIRECT	GO:0006368~	transcription elongation from RNA polymerase II promoter	1.6129	0.00922407	P10711, Q9QVN7, Q9Z199, P63271	242	36	19984	9.17539	0.999998	0.223118	0.216787	2.03508
GOTERM_BP_DIRECT	GO:0006366~	transcription from RNA polymerase II promoter	3.62903	0.00926441	Q64337, Q61687, A2A8L1, P62915, Q8CFI7, Q9JIB4, P49698, P60898, Q9D0D5	242	242	19984	3.0711	0.999999	0.223118	0.216787	2.03318
GOTERM_BP_DIRECT	GO:0018107~	peptidyl-threonine phosphorylation	2.01613	0.0111926	Q7TT50, P70336, P20444, P70335, Q62101	242	72	19984	5.73462	1	0.265135	0.257612	1.95107
GOTERM_BP_DIRECT	GO:0010468~	regulation of gene expression	5.24194	0.0133731	Q62511, Q9QXA7, P55200, Q9Z103, Q8BFX1, Q64321, P13864, P11531, Q99LG0, Q8C7Q4, Q3URU2, Q6PDK2, Q8BVW3	242	477	19984	2.25057	1	0.311679	0.302835	1.87377
GOTERM_BP_DIRECT	GO:0008285~	negative regulation of cell proliferation	4.83871	0.0146919	Q99KG3, Q64318, Q60953, A2A8L1, P55200, Q7TMA2, Q8R5A0, P49698, Q61164, Q8K3K8, P20444, Q99M87	242	426	19984	2.32616	1	0.335346	0.325831	1.83292
GOTERM_BP_DIRECT	GO:0032436~	positive regulation of proteasomal ubiquitin-dependent protein catabolic process	2.01613	0.0153192	P56399, Q9CR50, P62878, Q9Z1K5, Q9Z1K6	242	79	19984	5.22649	1	0.335346	0.325831	1.81476
GOTERM_BP_DIRECT	GO:0061014~	positive regulation of mRNA catabolic process	1.20968	0.0155489	Q9EPU0, Q3UPF5, P22893	242	16	19984	15.4835	1	0.335346	0.325831	1.8083
GOTERM_BP_DIRECT	GO:0032786~	positive regulation of DNA-templated transcription, elongation	1.20968	0.0155489	Q9Z199, P63271, Q5SVQ0	242	16	19984	15.4835	1	0.335346	0.325831	1.8083
GOTERM_BP_DIRECT	GO:0000245~	spliceosomal complex assembly	1.20968	0.0155489	Q62203, Q91YE7, Q3TIX9	242	16	19984	15.4835	1	0.335346	0.325831	1.8083
GOTERM_BP_DIRECT	GO:0006919~	activation of cysteine-type endopeptidase activity involved in apoptotic process	2.01613	0.015977	Q60953, P46718, Q6ZWY3, Q9WTZ1, Q99M87	242	80	19984	5.16116	1	0.339511	0.329878	1.7965
GOTERM_BP_DIRECT	GO:0030433~	ubiquitin-dependent ERAD pathway	2.01613	0.0166522	Q61510, Q9DBY1, P60670, Q3UJD6, Q9R049	242	81	19984	5.09744	1	0.348732	0.338837	1.77853
GOTERM_BP_DIRECT	GO:0009048~	dosage compensation by inactivation of X chromosome	1.20968	0.0174835	Q80U70, Q9EPU0, Q61164	242	17	19984	14.5727	1	0.360909	0.350669	1.75737
GOTERM_BP_DIRECT	GO:0032897~	negative regulation of viral transcription	1.20968	0.0195144	P22893, Q8CH72, Q8BVW3	242	18	19984	13.7631	1	0.386278	0.375318	1.70964
GOTERM_BP_DIRECT	GO:0034968~	histone lysine methylation	1.20968	0.0195144	O08550, Q8R5A0, Q3TYX3	242	18	19984	13.7631	1	0.386278	0.375318	1.70964
GOTERM_BP_DIRECT	GO:0060216~	definitive hemopoiesis	1.20968	0.0195144	P23949, P55200, O89090	242	18	19984	13.7631	1	0.386278	0.375318	1.70964
GOTERM_BP_DIRECT	GO:0006357~	regulation of transcription from RNA polymerase II promoter	12.0968	0.019879	O70433, Q8K2R5, Q61116, A2A8L1, Q925H1, Q9JIB4, O89090, Q8K0L9, Q64321, P56959, Q9ERU3, Q00899, P22893, P49698, Q8K3X4, Q2MHN3, Q61103, Q6ZPY7, Q64318, Q61624, Q9WTU0, Q9Z103, P59997, Q61164, Q99LG0, Q3URU2, A2CE44, Q8C0Q2, E9Q1P8, Q3U3I9	242	1613	19984	1.53587	1	0.388177	0.377163	1.70161
GOTERM_BP_DIRECT	GO:0010508~	positive regulation of autophagy	2.01613	0.0202952	Q8CH72, Q8BVW3, Q8K3K8, P70335, Q62101	242	86	19984	4.80108	1	0.391021	0.379926	1.69261
GOTERM_BP_DIRECT	GO:0045087~	innate immune response	6.45161	0.0209248	Q61510, Q60875, Q3UPF5, Q60953, Q62318, Q8BFX1, P11103, Q8CH72, Q8K3K8, Q62101, Q08288, Q8R151, Q91XU0, Q8BVW3, Q8K310, Q9DBR0	242	691	19984	1.91209	1	0.397847	0.386558	1.67934
GOTERM_BP_DIRECT	GO:0008631~	intrinsic apoptotic signaling pathway in response to oxidative stress	1.20968	0.021639	Q60953, Q9WTZ1, Q91VY9	242	19	19984	13.0387	1	0.406083	0.394561	1.66476
GOTERM_BP_DIRECT	GO:0009411~	response to UV	1.6129	0.022397	Q60953, Q9CWY9, Q9QXK2, Q8CH72	242	50	19984	6.60628	1	0.414919	0.403146	1.64981
GOTERM_BP_DIRECT	GO:0032012~	regulation of ARF protein signal transduction	1.20968	0.0238548	Q9JLQ2, Q9EPJ9, Q68FF6	242	20	19984	12.3868	1	0.433039	0.420752	1.62242
GOTERM_BP_DIRECT	GO:0045004~	DNA replication proofreading	0.806452	0.0239745	P52431, Q9WVF7	242	2	19984	82.5785	1	0.433039	0.420752	1.62025
GOTERM_BP_DIRECT	GO:0001701~	in utero embryonic development	4.03226	0.0253944	Q80SY4, O88878, Q62318, Q9DBY1, Q6PDK2, O89090, Q99L45, P59997, Q5U430, P97868	242	347	19984	2.37978	1	0.453024	0.44017	1.59526
GOTERM_BP_DIRECT	GO:0006471~	protein ADP-ribosylation	1.20968	0.0261594	Q3UPF5, Q8C1B2, P11103	242	21	19984	11.7969	1	0.460979	0.447899	1.58237
GOTERM_BP_DIRECT	GO:0031397~	negative regulation of protein ubiquitination	1.6129	0.0273726	Q64337, Q922H1, P63037, P26369	242	54	19984	6.11693	1	0.470567	0.457215	1.56268
GOTERM_BP_DIRECT	GO:0070534~	protein K63-linked ubiquitination	1.6129	0.0273726	Q62511, Q91YL2, E9Q555, Q9Z1K6	242	54	19984	6.11693	1	0.470567	0.457215	1.56268
GOTERM_BP_DIRECT	GO:0006468~	protein phosphorylation	6.04839	0.0278916	Q64337, Q62318, Q7TT50, P04627, Q62074, Q61097, Q02111, Q9WTJ4, P70336, P70335, Q62101, Q9JM13, Q8K1Y2, P22682, P20444	242	654	19984	1.894	1	0.470567	0.457215	1.55453
GOTERM_BP_DIRECT	GO:0031647~	regulation of protein stability	2.01613	0.028006	Q91W36, Q3UJD6, Q9Z2V5, Q80TP3, Q62101	242	95	19984	4.34624	1	0.470567	0.457215	1.55275
GOTERM_BP_DIRECT	GO:0031065~	positive regulation of histone deacetylation	1.20968	0.0285501	Q60953, Q64321, Q9DBR0	242	22	19984	11.2607	1	0.474195	0.46074	1.54439
GOTERM_BP_DIRECT	GO:0050821~	protein stabilization	2.82258	0.0325106	Q8R5K2, Q60953, Q9QXA7, Q9DBY1, Q3UJD6, Q9JMD0, Q99M87	242	197	19984	2.93426	1	0.53384	0.518693	1.48797
GOTERM_BP_DIRECT	GO:0080182~	histone H3-K4 trimethylation	1.20968	0.0335809	O08550, P55200, Q6PDK2	242	24	19984	10.3223	1	0.543718	0.528291	1.47391
GOTERM_BP_DIRECT	GO:0089700~	protein kinase D signaling	0.806452	0.0357462	Q8K1Y2, Q62101	242	3	19984	55.0523	1	0.543718	0.528291	1.44677
GOTERM_BP_DIRECT	GO:1904071~	presynaptic active zone assembly	0.806452	0.0357462	O88737, Q9QYX7	242	3	19984	55.0523	1	0.543718	0.528291	1.44677
GOTERM_BP_DIRECT	GO:0099526~	presynapse to nucleus signaling pathway	0.806452	0.0357462	O88737, Q9QYX7	242	3	19984	55.0523	1	0.543718	0.528291	1.44677
GOTERM_BP_DIRECT	GO:0006273~	lagging strand elongation	0.806452	0.0357462	P97386, P33609	242	3	19984	55.0523	1	0.543718	0.528291	1.44677
GOTERM_BP_DIRECT	GO:1902499~	positive regulation of protein autoubiquitination	0.806452	0.0357462	P62878, Q8K4B0	242	3	19984	55.0523	1	0.543718	0.528291	1.44677
GOTERM_BP_DIRECT	GO:1903241~	U2-type prespliceosome assembly	0.806452	0.0357462	Q62203, Q9D554	242	3	19984	55.0523	1	0.543718	0.528291	1.44677
GOTERM_BP_DIRECT	GO:0046716~	muscle cell cellular homeostasis	1.20968	0.0389285	Q8CH72, P20444, P11531	242	26	19984	9.52829	1	0.573997	0.557711	1.40973
GOTERM_BP_DIRECT	GO:0048025~	negative regulation of mRNA splicing, via spliceosome	1.20968	0.0389285	Q99KG3, Q8BL97, P26369	242	26	19984	9.52829	1	0.573997	0.557711	1.40973
GOTERM_BP_DIRECT	GO:0035278~	miRNA mediated inhibition of translation	1.20968	0.0389285	Q8C7Q4, Q1PSW8, P22893	242	26	19984	9.52829	1	0.573997	0.557711	1.40973
GOTERM_BP_DIRECT	GO:0071108~	protein K48-linked deubiquitination	1.20968	0.0417155	Q8R5K2, P56399, Q3UJD6	242	27	19984	9.17539	1	0.602789	0.585686	1.3797
GOTERM_BP_DIRECT	GO:0048598~	embryonic morphogenesis	1.20968	0.0417155	Q64318, P70336, P70335	242	27	19984	9.17539	1	0.602789	0.585686	1.3797
GOTERM_BP_DIRECT	GO:1900037~	regulation of cellular response to hypoxia	0.806452	0.0473765	Q3UJD6, P70336	242	4	19984	41.2893	1	0.641538	0.623336	1.32444
GOTERM_BP_DIRECT	GO:1905205~	positive regulation of connective tissue replacement	0.806452	0.0473765	P70336, P70335	242	4	19984	41.2893	1	0.641538	0.623336	1.32444
GOTERM_BP_DIRECT	GO:0002940~	tRNA N2-guanine methylation	0.806452	0.0473765	Q3TX08, A2RSY6	242	4	19984	41.2893	1	0.641538	0.623336	1.32444
GOTERM_BP_DIRECT	GO:0006272~	leading strand elongation	0.806452	0.0473765	P33609, Q9WVF7	242	4	19984	41.2893	1	0.641538	0.623336	1.32444
GOTERM_BP_DIRECT	GO:0048205~	COPI coating of Golgi vesicle	0.806452	0.0473765	Q99K28, Q9D8S3	242	4	19984	41.2893	1	0.641538	0.623336	1.32444
GOTERM_BP_DIRECT	GO:1904666~	regulation of ubiquitin protein ligase activity	0.806452	0.0473765	O88737, Q9QYX7	242	4	19984	41.2893	1	0.641538	0.623336	1.32444
GOTERM_BP_DIRECT	GO:0043153~	entrainment of circadian clock by photoperiod	1.20968	0.0475049	Q8C7Q4, Q60953, Q8K4B0	242	29	19984	8.5426	1	0.641538	0.623336	1.32326
GOTERM_BP_DIRECT	GO:0016925~	protein sumoylation	1.20968	0.0505031	Q62318, Q9ERU9, P63280	242	30	19984	8.25785	1	0.675713	0.656541	1.29668
GOTERM_BP_DIRECT	GO:0010628~	positive regulation of gene expression	5.24194	0.054363	O89090, Q64321, Q80TP3, P59997, P13864, Q61164, Q62384, Q8K3K8, P70336, P70335, Q00899, P49698, Q99LI8	242	590	19984	1.81953	1	0.720684	0.700236	1.2647
GOTERM_BP_DIRECT	GO:1903347~	negative regulation of bicellular tight junction assembly	0.806452	0.0588671	P70336, P70335	242	5	19984	33.0314	1	0.733363	0.712555	1.23013
GOTERM_BP_DIRECT	GO:0099536~	synaptic signaling	0.806452	0.0588671	Q80UY2, O70585	242	5	19984	33.0314	1	0.733363	0.712555	1.23013
GOTERM_BP_DIRECT	GO:0061734~	parkin-mediated stimulation of mitophagy in response to mitochondrial depolarization	0.806452	0.0588671	Q9Z2V5, Q8K3K8	242	5	19984	33.0314	1	0.733363	0.712555	1.23013
GOTERM_BP_DIRECT	GO:0006297~	nucleotide-excision repair, DNA gap filling	0.806452	0.0588671	P52431, Q9WVF7	242	5	19984	33.0314	1	0.733363	0.712555	1.23013
GOTERM_BP_DIRECT	GO:0032785~	negative regulation of DNA-templated transcription, elongation	0.806452	0.0588671	Q9Z199, P63271	242	5	19984	33.0314	1	0.733363	0.712555	1.23013
GOTERM_BP_DIRECT	GO:0006303~	double-strand break repair via nonhomologous end joining	1.20968	0.0598871	P97386, P33609, P59997	242	33	19984	7.50714	1	0.733363	0.712555	1.22267
GOTERM_BP_DIRECT	GO:0010332~	response to gamma radiation	1.20968	0.0598871	Q60953, P11103, P22682	242	33	19984	7.50714	1	0.733363	0.712555	1.22267
GOTERM_BP_DIRECT	GO:0043122~	regulation of I-kappaB kinase/NF-kappaB signaling	1.20968	0.0598871	Q64337, Q8K3K8, Q9DCH6	242	33	19984	7.50714	1	0.733363	0.712555	1.22267
GOTERM_BP_DIRECT	GO:0040029~	regulation of gene expression, epigenetic	1.20968	0.0598871	Q9Z2V5, Q61164, Q8K4B0	242	33	19984	7.50714	1	0.733363	0.712555	1.22267
GOTERM_BP_DIRECT	GO:0031032~	actomyosin structure organization	1.20968	0.0631383	Q7TT50, P70336, P70335	242	34	19984	7.28634	1	0.766679	0.744926	1.19971
GOTERM_BP_DIRECT	GO:0043488~	regulation of mRNA stability	1.20968	0.0664479	P23949, Q8BJ05, P22893	242	35	19984	7.07816	1	0.800143	0.77744	1.17752
GOTERM_BP_DIRECT	GO:0050779~	RNA destabilization	0.806452	0.0702196	Q0P678, P22893	242	6	19984	27.5262	1	0.811739	0.788707	1.15354
GOTERM_BP_DIRECT	GO:0006287~	base-excision repair, gap-filling	0.806452	0.0702196	P52431, Q9WVF7	242	6	19984	27.5262	1	0.811739	0.788707	1.15354
GOTERM_BP_DIRECT	GO:1902975~	mitotic DNA replication initiation	0.806452	0.0702196	P97310, P33609	242	6	19984	27.5262	1	0.811739	0.788707	1.15354
GOTERM_BP_DIRECT	GO:0043045~	DNA methylation involved in embryo development	0.806452	0.0702196	Q62318, P13864	242	6	19984	27.5262	1	0.811739	0.788707	1.15354
GOTERM_BP_DIRECT	GO:0035509~	negative regulation of myosin-light-chain-phosphatase activity	0.806452	0.0702196	P70336, P70335	242	6	19984	27.5262	1	0.811739	0.788707	1.15354
GOTERM_BP_DIRECT	GO:0018105~	peptidyl-serine phosphorylation	2.41935	0.0713879	Q62074, Q02111, P70336, P20444, P70335, Q62101	242	183	19984	2.70749	1	0.818695	0.795465	1.14638
GOTERM_BP_DIRECT	GO:0031398~	positive regulation of protein ubiquitination	1.6129	0.0724476	Q7TPH6, Q9CR50, O08759, Q99M87	242	80	19984	4.12893	1	0.824305	0.800916	1.13998
GOTERM_BP_DIRECT	GO:1901888~	regulation of cell junction assembly	0.806452	0.0814358	P70336, P70335	242	7	19984	23.5939	1	0.891476	0.866181	1.08918
GOTERM_BP_DIRECT	GO:0090330~	regulation of platelet aggregation	0.806452	0.0814358	Q02111, P20444	242	7	19984	23.5939	1	0.891476	0.866181	1.08918
GOTERM_BP_DIRECT	GO:0002327~	immature B cell differentiation	0.806452	0.0814358	Q9DBY1, E9Q1P8	242	7	19984	23.5939	1	0.891476	0.866181	1.08918
GOTERM_BP_DIRECT	GO:0030578~	PML body organization	0.806452	0.0814358	Q8VHH5, Q60953	242	7	19984	23.5939	1	0.891476	0.866181	1.08918
GOTERM_BP_DIRECT	GO:0043504~	mitochondrial DNA repair	0.806452	0.0814358	P97386, P11103	242	7	19984	23.5939	1	0.891476	0.866181	1.08918
GOTERM_BP_DIRECT	GO:2000300~	regulation of synaptic vesicle exocytosis	1.6129	0.0857373	Q9JLQ2, Q8R307, P20444, Q68FF6	242	86	19984	3.84086	1	0.931507	0.905076	1.06683
GOTERM_BP_DIRECT	GO:0015031~	protein transport	5.24194	0.0887954	Q9ERU9, Q9D8S3, Q8BXK8, Q9DCH6, Q9JM13, Q91WB4, Q99K28, P47708, Q8BIJ7, Q8R307, Q99LI8, Q9EPJ9, Q9DBR0	242	641	19984	1.67476	1	0.934877	0.908351	1.05161
GOTERM_BP_DIRECT	GO:0007032~	endosome organization	1.20968	0.0910975	Q64337, Q91WB4, Q8R307	242	42	19984	5.89847	1	0.934877	0.908351	1.04049
GOTERM_BP_DIRECT	GO:0030036~	actin cytoskeleton organization	2.41935	0.092292	Q3UHD9, Q7TT50, Q9R059, P70336, P70335, P11531	242	198	19984	2.50238	1	0.934877	0.908351	1.03484
GOTERM_BP_DIRECT	GO:0071559~	response to transforming growth factor beta	0.806452	0.0925173	P70336, P70335	242	8	19984	20.6446	1	0.934877	0.908351	1.03378
GOTERM_BP_DIRECT	GO:0010837~	regulation of keratinocyte proliferation	0.806452	0.0925173	P22893, Q62101	242	8	19984	20.6446	1	0.934877	0.908351	1.03378
GOTERM_BP_DIRECT	GO:1990776~	response to angiotensin	0.806452	0.0925173	P70336, P70335	242	8	19984	20.6446	1	0.934877	0.908351	1.03378
GOTERM_BP_DIRECT	GO:1900364~	negative regulation of mRNA polyadenylation	0.806452	0.0925173	Q3U319, Q8BJ05	242	8	19984	20.6446	1	0.934877	0.908351	1.03378
GOTERM_BP_DIRECT	GO:0042769~	DNA damage response, detection of DNA damage	0.806452	0.0925173	P63037, P11103	242	8	19984	20.6446	1	0.934877	0.908351	1.03378
GOTERM_BP_DIRECT	GO:0061743~	motor learning	0.806452	0.0925173	O08759, Q68FF6	242	8	19984	20.6446	1	0.934877	0.908351	1.03378
GOTERM_BP_DIRECT	GO:0000375~	RNA splicing, via transesterification reactions	0.806452	0.0925173	Q8BHJ9, Q62203	242	8	19984	20.6446	1	0.934877	0.908351	1.03378
GOTERM_BP_DIRECT	GO:0043967~	histone H4 acetylation	1.20968	0.09481	A2A8L1, Q5SVQ0, Q99PP9	242	43	19984	5.76129	1	0.94152	0.914806	1.02315
GOTERM_BP_DIRECT	GO:0043536~	positive regulation of blood vessel endothelial cell migration	1.20968	0.09481	O89090, P20444, Q62101	242	43	19984	5.76129	1	0.94152	0.914806	1.02315
GOTERM_BP_DIRECT	GO:0006310~	DNA recombination	1.6129	0.0951294	P97386, Q00899, Q9CWY9, Q9DBR1	242	90	19984	3.67016	1	0.94152	0.914806	1.02169
GOTERM_BP_DIRECT	GO:0007049~	cell cycle	5.24194	0.0979255	Q91W36, Q60875, P97386, P97310, Q80YV2, P63280, Q9JMD0, Q9WVM1, Q99LG0, Q8BMJ7, Q8VDF2, Q3TIX9, Q9DAZ9	242	653	19984	1.64398	1	0.954697	0.927609	1.0091
GOTERM_BP_DIRECT	GO:0016570~	histone modification	1.20968	0.0985653	P55200, Q8R5A0, Q5SVQ0	242	44	19984	5.63035	1	0.954697	0.927609	1.00628
GOTERM_BP_DIRECT	GO:0008277~	regulation of G-protein coupled receptor protein signaling pathway	1.20968	0.0985653	Q8R5K2, Q9JLQ2, Q68FF6	242	44	19984	5.63035	1	0.954697	0.927609	1.00628

## Sheet: MICE KEGG
Category	Term	Column1	%	PValue	Genes	List Total	Pop Hits	Pop Total	Fold Enrichment	Bonferroni	Benjamini	FDR	NegativeLog10
KEGG_PATHWAY	mmu04144:	Endocytosis	6.04839	3.6706e-06	Q60953, Q3UHD9, Q9D8S3, Q8BXK8, Q62074, Q68FF6, Q8VHH5, Q9JLQ2, Q99K28, Q8BIJ7, Q91VZ6, P22682, Q99LI8, Q8BL66, Q9EPJ9	108	272	9011	4.60121	0.000616472	0.000616661	0.00061299	5.43526
KEGG_PATHWAY	mmu04120:	Ubiquitin mediated proteolysis	4.43548	8.93717e-06	Q60953, Q9DBY1, Q9WTZ1, Q9CR50, P63280, P62878, O08759, Q80TP3, Q8CH72, P22682, P62983	108	147	9011	6.24345	0.00150033	0.000750723	0.000746254	5.0488
KEGG_PATHWAY	mmu03040:	Spliceosome	4.03226	2.8429e-05	Q8BHJ9, Q62203, Q8BL97, Q9D554, Q3TIX9, Q8BGJ9, Q62241, P56959, Q9D883, P26369	108	134	9011	6.22651	0.00476474	0.00159202	0.00158254	4.54624
KEGG_PATHWAY	mmu03030:	DNA replication	1.6129	0.00808551	P52431, P97310, P33609, Q9WVF7	108	35	9011	9.53545	0.744335	0.244872	0.243415	2.09229
KEGG_PATHWAY	mmu04137:	Mitophagy - animal	2.01613	0.00855089	Q64337, Q3UKC1, O89090, Q8K3K8, P62983	108	68	9011	6.13494	0.763717	0.244872	0.243415	2.06799
KEGG_PATHWAY	mmu03410:	Base excision repair	1.6129	0.00874544	P97386, P52431, P11103, Q9WVF7	108	36	9011	9.27058	0.771381	0.244872	0.243415	2.05822
KEGG_PATHWAY	mmu03420:	Nucleotide excision repair	1.6129	0.0142394	P52431, Q9JIB4, P62878, Q9WVF7	108	43	9011	7.76141	0.910132	0.341745	0.339711	1.84651
KEGG_PATHWAY	mmu05203:	Viral carcinogenesis	3.22581	0.0190448	P62915, Q9JIB4, O08759, Q9Z2V5, Q6PDQ2, A2AN08, Q99M87, Q9D0D5	108	229	9011	2.91477	0.960458	0.399941	0.39756	1.72022
KEGG_PATHWAY	mmu03250:	Viral life cycle - HIV-1	1.6129	0.0356519	Q9ERU9, Q9Z199, P63271, Q99LI8	108	61	9011	5.47116	0.997755	0.665502	0.66154	1.44792
KEGG_PATHWAY	mmu00310:	Lysine degradation	1.6129	0.0402429	O08550, P55200, Q6PDK2, Q8R5A0	108	64	9011	5.2147	0.998993	0.676081	0.672056	1.39531
KEGG_PATHWAY	mmu04141:	Protein processing in endoplasmic reticulum	2.41935	0.0536938	P63037, Q9DBY1, P60670, Q9QYJ0, P62878, Q9R049	108	172	9011	2.91053	0.999906	0.770058	0.765474	1.27008
KEGG_PATHWAY	mmu03020:	RNA polymerase	1.20968	0.0550041	Q8CFI7, P60898, P70700	108	32	9011	7.82205	0.999925	0.770058	0.765474	1.2596
KEGG_PATHWAY	mmu04270:	Vascular smooth muscle contraction	2.01613	0.0919315	P04627, Q02111, P70336, P20444, P70335	108	144	9011	2.89706	1	1	1	1.03654
KEGG_PATHWAY	mmu03022:	Basal transcription factors	1.20968	0.0958291	P62915, Q9JIB4, Q9D0D5	108	44	9011	5.68876	1	1	1	1.0185
