# Supplementary material for: Mining proteomes for zinc finger persulfidation
Source: Royal Society of Chemistry journal article supplement (doi:10.1039/d3cb00106g), 2024-01-01
Supplement: d3cb00106g6.xlsx [file d3cb00106g6.xlsx]

## Sheet: DAVID GO BP Arabidopsis thalian
Category	Term	Column1	%	PValue	Genes	List Total	Pop Hits	Pop Total	Fold Enrichment	Bonferroni	Benjamini	FDR	Negative LOG10 calculation
GOTERM_BP_DIRECT	GO:0006267~	Pre-replicative complex assembly involved in nuclear cell cycle DNA replication	6.15385	6.86754e-07	Q0WVF5, F4KAB8, P43299, Q9LPD9	63	7	22556	204.59	0.000117428	6.7499e-05	6.35516e-05	6.1632
GOTERM_BP_DIRECT	GO:0006325~	Chromatin organization	10.7692	7.89461e-07	Q8LA16, Q9M2B4, F4JL28, Q9LZR5, O81488, Q9FFF5, Q9SRM4	63	116	22556	21.6054	0.000134989	6.7499e-05	6.35516e-05	6.10267
GOTERM_BP_DIRECT	GO:0006355~	Regulation of transcription, DNA-templated	26.1538	3.01417e-06	Q9M2B4, Q9ZQ18, F4JL28, Q9LIE5, Q9FFF5, Q9LQM3, Q9SRM4, Q8LA16, Q9LHF0, Q8H1G5, P93755, Q9LUZ4, Q9ZVD0, Q8H1G0, Q9C7C3, O81488, Q9SLB9	63	1549	22556	3.92933	0.000515291	0.000137323	0.000129292	5.52083
GOTERM_BP_DIRECT	GO:0000727~	Double-strand break repair via break-induced replication	6.15385	3.21223e-06	Q0WVF5, F4KAB8, P43299, Q9LPD9	63	11	22556	130.193	0.000549142	0.000137323	0.000129292	5.49319
GOTERM_BP_DIRECT	GO:0000398~	mRNA splicing, via spliceosome	10.7692	9.45961e-06	O81126, Q9SJA6, Q9S709, Q9FMY5, Q8VYA5, Q84WU9, Q9FYB7	63	178	22556	14.0799	0.00161629	0.000323519	0.000304599	5.02413
GOTERM_BP_DIRECT	GO:0006268~	DNA unwinding involved in DNA replication	6.15385	1.85708e-05	Q0WVF5, F4KAB8, P43299, Q9LPD9	63	19	22556	75.3751	0.0031706	0.000529268	0.000498317	4.73117
GOTERM_BP_DIRECT	GO:0006270~	DNA replication initiation	6.15385	2.93409e-05	Q0WVF5, F4KAB8, P43299, Q9LPD9	63	22	22556	65.0967	0.0050048	0.000716756	0.00067484	4.53253
GOTERM_BP_DIRECT	GO:0045892~	negative regulation of transcription, DNA-templated	9.23077	0.000286664	Q9FVE6, Q9LZR5, Q8RWN5, Q9M8S7, Q84JU6, Q84WU9	63	211	22556	10.181	0.0478441	0.00612744	0.00576911	3.54263
GOTERM_BP_DIRECT	GO:0008380~	RNA splicing	7.69231	0.000537944	Q9ZVD0, O81126, Q9SJA6, Q8VYA5, Q9FYB7	63	136	22556	13.1629	0.0879068	0.0102209	0.00962322	3.26926
GOTERM_BP_DIRECT	GO:0016567~	protein ubiquitination	12.3077	0.00132232	Q9LFC0, Q8LPN7, O80996, Q9M2V1, Q84JU6, E0X9N4, Q9S752, Q9SY88	63	605	22556	4.7343	0.202495	0.0226117	0.0212894	2.87866
GOTERM_BP_DIRECT	GO:0050793~	regulation of developmental process	7.69231	0.00625506	Q8LA16, Q9T0J6, Q8H1G0, Q9FNZ1, Q947D2	63	267	22556	6.70471	0.65801	0.0972378	0.0915514	2.20377
GOTERM_BP_DIRECT	GO:0090070~	positive regulation of ribosome biogenesis	3.07692	0.00822386	Q8H1G5, Q9ZQ18	63	3	22556	238.688	0.756368	0.11719	0.110337	2.08492
GOTERM_BP_DIRECT	GO:0009631~	cold acclimation	4.61538	0.0126449	Q8H1G5, Q9ZQ18, Q9LIN3	63	62	22556	17.3241	0.886512	0.166329	0.156602	1.89809
GOTERM_BP_DIRECT	GO:0006271~	DNA strand elongation involved in DNA replication	3.07692	0.0136694	Q0WVF5, P43299	63	5	22556	143.213	0.904973	0.166962	0.157198	1.86425
GOTERM_BP_DIRECT	GO:1902975~	mitotic DNA replication initiation	3.07692	0.0163812	Q0WVF5, Q9LPD9	63	6	22556	119.344	0.940654	0.186745	0.175825	1.78566
GOTERM_BP_DIRECT	GO:0009409~	response to cold	7.69231	0.0309935	Q9SUM4, Q9LIN3, Q9LZR5, Q8RWN5, Q84JU6	63	432	22556	4.14389	0.995409	0.331243	0.311872	1.50873
GOTERM_BP_DIRECT	GO:0048367~	shoot system development	6.15385	0.0567001	Q9ZVD0, Q8H1G0, Q84WU9, Q9FNZ1	63	317	22556	4.51775	0.999954	0.529061	0.498122	1.24642
GOTERM_BP_DIRECT	GO:0010629~	negative regulation of gene expression	4.61538	0.0568012	Q9M2B4, Q8H1G0, O81488	63	140	22556	7.67211	0.999955	0.529061	0.498122	1.24564
GOTERM_BP_DIRECT	GO:0042273~	ribosomal large subunit biogenesis	3.07692	0.0587846	Q8H1G5, Q9ZQ18	63	22	22556	32.5483	0.999968	0.529061	0.498122	1.23074
GOTERM_BP_DIRECT	GO:0009791~	post-embryonic development	3.07692	0.0843679	F4JL28, Q9M2N5	63	32	22556	22.377	1	0.721346	0.679162	1.07382
GOTERM_BP_DIRECT	GO:0010162~	seed dormancy process	3.07692	0.0919086	Q9FVE6, Q9LZR5	63	35	22556	20.459	1	0.748399	0.704633	1.03664

## Sheet: DAVID GO CC Arabidopsis thalian
Category	Term	Column1	%	PValue	Genes	List Total	Pop Hits	Pop Total	Fold Enrichment	Bonferroni	Benjamini	FDR	Negative LOG10 calculation
GOTERM_CC_DIRECT	GO:0016607~	Nuclear speck	16.9231	7.15389e-14	Q9LFC0, Q9ZVD0, O81126, Q9SJA6, Q9S709, Q9FMY5, Q9M8S7, Q8VYA5, Q680Q4, Q9SY88, Q9FYB7	64	104	26021	43.0035	2.78844e-12	2.79002e-12	2.21771e-12	13.1455
GOTERM_CC_DIRECT	GO:0005634~	Nucleus	83.0769	5.10443e-12	Q9M2B4, Q9ZUM0, Q8L7S3, Q94B71, Q9C911, Q84WU9, Q9FFF5, Q9M2N5, Q8LA16, Q8H1G5, Q9T0J6, Q9FVE6, Q9LIN3, Q8H1G0, Q9M2V1, Q9ZQ18, Q9LIE5, Q8RXE7, Q9FYB7, Q9LQM3, Q9SRM4, Q9ZVD0, Q94AD9, F4JL28, Q8LPN7, Q9LZR5, Q8RWN5, Q0WVF5, F4KAB8, Q680Q4, Q8L829, Q9LHF0, Q9M354, P93755, Q9LNV5, Q84JE8, O81126, Q9C7C3, O81488, Q9S709, E0X9N4, Q9SLB9, P43299, Q84W91, Q9SQU4, Q8VYA5, Q9M8S7, Q9S752, Q9SY88, Q9FL69,…	64	10873	26021	2.01924	1.99074e-10	9.95363e-11	7.91186e-11	11.2921
GOTERM_CC_DIRECT	GO:0005681~	Spliceosomal complex	10.7692	2.93109e-07	O81126, Q9SJA6, Q9S709, Q9FMY5, Q9M8S7, Q8VYA5, Q9FYB7	64	111	26021	25.6401	1.14312e-05	3.81042e-06	3.0288e-06	6.53297
GOTERM_CC_DIRECT	GO:0042555~	MCM complex	6.15385	1.60347e-06	Q0WVF5, F4KAB8, P43299, Q9LPD9	64	10	26021	162.631	6.25333e-05	1.56338e-05	1.24269e-05	5.79494
GOTERM_CC_DIRECT	GO:0000347~	THO complex	6.15385	4.83031e-06	Q0WVF5, F4KAB8, P43299, Q9LPD9	64	14	26021	116.165	0.000188365	3.76764e-05	2.99479e-05	5.31602
GOTERM_CC_DIRECT	GO:0000785~	Chromatin	6.15385	0.000659505	Q0WVF5, F4KAB8, P43299, Q9LPD9	64	70	26021	23.233	0.025401	0.00428678	0.00340744	3.18078
GOTERM_CC_DIRECT	GO:0005730~	nucleolus	10.7692	0.00166752	Q9ZVD0, Q9FVE6, O81126, Q9LZR5, Q9SJA6, Q9S709, Q8RWN5	64	524	26021	5.43139	0.0630147	0.00929048	0.00738474	2.77793
GOTERM_CC_DIRECT	GO:0005829~	cytosol	26.1538	0.00431305	Q9ZQ18, Q0WVF5, Q9M8S7, Q84WU9, Q9M2N5, Q9SRM4, Q9FL69, Q8H1G5, Q9M354, Q9ZVD0, Q9LIN3, Q0WVD6, Q9SJA6, Q9M2V1, O81488, Q9LPD9, Q9SK74	64	3286	26021	2.10342	0.15513	0.0210261	0.0167131	2.36522
GOTERM_CC_DIRECT	GO:0000151~	ubiquitin ligase complex	4.61538	0.0132247	Q84RR0, O80996, Q8L829	64	72	26021	16.9408	0.405007	0.0573072	0.0455519	1.87861
GOTERM_CC_DIRECT	GO:0089701~	U2AF	3.07692	0.0192082	Q9S709, Q9FMY5	64	8	26021	101.645	0.530651	0.074912	0.0595454	1.71651
GOTERM_CC_DIRECT	GO:0030687~	preribosome, large subunit precursor	3.07692	0.0542499	Q8H1G5, Q9ZQ18	64	23	26021	35.3546	0.886426	0.192341	0.152886	1.2656

## Sheet: DAVID GO MF Arabidopsis thalian
Category	Term	Column1	%	PValue	Genes	List Total	Pop Hits	Pop Total	Fold Enrichment	Bonferroni	Benjamini	FDR	Negative LOG10 calculation
GOTERM_MF_DIRECT	GO:0046872~	Metal ion binding	76.9231	3.83189e-33	Q9M2B4, Q9ZUM0, Q8L7S3, Q94B71, Q84WU9, Q9FFF5, Q9M2N5, Q8LA16, Q9T0J6, Q9LUZ4, Q9FVE6, Q0WVD6, Q9M2V1, Q9FNZ1, Q84RR0, Q8RXE7, Q9LQM3, Q9SRM4, Q9LFC0, Q9ZVD0, Q9SV09, Q94AD9, Q9SK74, F4JL28, Q8LPN7, Q9LZR5, Q0WVF5, F4KAB8, Q8L829, Q947D2, Q9LHF0, Q9M354, P93755, Q9LNV5, Q9C7C3, O81488, Q9S709, E0X9N4, Q9SLB9, P43299, Q84W91, Q9SQU4, Q9S752, Q9SY88, Q9FL69, Q9SUM4, Q9FMY5, Q84JU6, Q9FVJ3, Q9LPD9	65	2258	19266	6.56333	2.14586e-31	2.14586e-31	1.57108e-31	32.4166
GOTERM_MF_DIRECT	GO:0003677~	DNA binding	41.5385	1.67255e-12	Q9ZUM0, Q8L7S3, Q0WVF5, Q84WU9, F4KAB8, Q9M2N5, Q9LHF0, P93755, Q9LUZ4, Q9LIN3, Q9LNV5, Q84JE8, Q9S709, Q9C7C3, E0X9N4, Q9FNZ1, P43299, Q84W91, Q9SQU4, Q9LQM3, Q9SUM4, Q9ZVD0, Q9SV09, Q9FMY5, Q9LPD9, Q94AD9, Q9SK74	65	1596	19266	5.01429	9.36629e-11	4.68314e-11	3.42873e-11	11.7766
GOTERM_MF_DIRECT	GO:0035064~	Methylated histone binding	9.23077	5.14586e-09	Q8LA16, Q9SUM4, F4JL28, O81488, Q9FFF5, Q9SRM4	65	20	19266	88.92	2.88168e-07	9.6056e-08	7.03267e-08	8.28854
GOTERM_MF_DIRECT	GO:0005515~	Protein binding	55.3846	3.37475e-08	Q9ZUM0, F4JL28, Q94B71, Q9C911, Q9LZR5, Q0WVF5, F4KAB8, Q680Q4, Q9M2N5, Q8H1G5, Q9LHF0, Q9M354, P93755, Q9LUZ4, Q9FVE6, O80996, Q9LNV5, Q84JE8, O81126, Q8H1G0, Q9M2V1, Q9S709, Q9SLB9, P43299, Q9ZQ18, Q8VYA5, Q9LIE5, Q9S752, Q9FL69, Q9LFC0, Q9SUM4, Q9ZVD0, Q9SJA6, Q9FMY5, Q84JU6, Q9LPD9	65	4403	19266	2.42344	1.88986e-06	4.72465e-07	3.45912e-07	7.47176
GOTERM_MF_DIRECT	GO:0008270~	Zinc ion binding	23.0769	4.7338e-08	Q9ZQ18, Q9C911, Q8RWN5, Q8VYA5, Q9M8S7, Q9LIE5, Q680Q4, Q9FYB7, Q8H1G5, Q9LIN3, O80996, Q84JE8, O81126, Q9SJA6, Q8H1G0	65	692	19266	6.42486	2.65093e-06	5.30186e-07	3.88172e-07	7.32479
GOTERM_MF_DIRECT	GO:0000976~	Transcription regulatory region sequence-specific DNA binding	21.5385	7.89978e-07	Q9M2B4, Q9ZQ18, Q8L7S3, F4JL28, Q9LZR5, Q9FFF5, Q9LQM3, Q9SRM4, Q8LA16, Q9LHF0, Q8H1G5, Q0WVD6, Q8H1G0, O81488	65	742	19266	5.59245	4.42378e-05	7.37313e-06	5.39818e-06	6.10238
GOTERM_MF_DIRECT	GO:0003729~	mRNA binding	21.5385	2.90045e-05	Q9ZUM0, Q84W91, Q9SQU4, Q8RWN5, Q8VYA5, Q9FYB7, Q9LQM3, Q9LIN3, O81126, Q9SV09, Q9LNV5, Q9SJA6, Q9FNZ1, Q94AD9	65	1034	19266	4.01315	0.00162296	0.000202939	0.000148581	4.53753
GOTERM_MF_DIRECT	GO:0061630~	Ubiquitin protein ligase activity	12.3077	2.94293e-05	Q9LFC0, Q8LPN7, Q84RR0, Q9M2V1, E0X9N4, Q8L829, Q9S752, Q9SY88	65	268	19266	8.84776	0.00164671	0.000202939	0.000148581	4.53122
GOTERM_MF_DIRECT	GO:0003688~	DNA replication origin binding	6.15385	3.26152e-05	Q0WVF5, F4KAB8, P43299, Q9LPD9	65	19	19266	62.4	0.00182482	0.000202939	0.000148581	4.48658
GOTERM_MF_DIRECT	GO:0003712~	transcription cofactor activity	7.69231	0.000138021	Q8LA16, Q9M2B4, O81488, Q9FFF5, Q9SRM4	65	79	19266	18.7595	0.00769991	0.000772918	0.000565886	3.86005
GOTERM_MF_DIRECT	GO:0042393~	histone binding	7.69231	0.000183248	Q8LA16, Q9M2B4, O81488, Q9FFF5, Q9SRM4	65	85	19266	17.4353	0.0102104	0.0009329	0.000683016	3.73696
GOTERM_MF_DIRECT	GO:0003678~	DNA helicase activity	6.15385	0.000543503	Q0WVF5, F4KAB8, P43299, Q9LPD9	65	48	19266	24.7	0.0299857	0.00253635	0.00185697	3.2648
GOTERM_MF_DIRECT	GO:0003676~	nucleic acid binding	12.3077	0.00106533	Q8H1G5, Q9C911, Q9LIN3, O81126, Q9SJA6, Q8RWN5, Q9M8S7, Q8VYA5	65	482	19266	4.9195	0.0579438	0.00458912	0.00335989	2.97252
GOTERM_MF_DIRECT	GO:0003697~	single-stranded DNA binding	6.15385	0.0019157	Q0WVF5, F4KAB8, P43299, Q9LPD9	65	74	19266	16.0216	0.101818	0.00766281	0.00561027	2.71767
GOTERM_MF_DIRECT	GO:0005096~	GTPase activator activity	6.15385	0.00294009	Q9M354, Q8RXE7, Q9FL69, Q9FVJ3	65	86	19266	13.786	0.152011	0.0109763	0.00803625	2.53164
GOTERM_MF_DIRECT	GO:0003723~	RNA binding	15.3846	0.00409858	Q9LUZ4, Q9LIN3, O81126, Q9SJA6, Q9S709, Q9C7C3, Q9FMY5, Q8RWN5, Q8VYA5, Q9FYB7	65	954	19266	3.10692	0.20546	0.014345	0.0105026	2.38737
GOTERM_MF_DIRECT	GO:0004842~	ubiquitin-protein transferase activity	7.69231	0.0180197	Q84RR0, O80996, Q84JU6, Q8L829, Q9S752	65	302	19266	4.90728	0.638793	0.059359	0.0434593	1.74425
GOTERM_MF_DIRECT	GO:0030628~	pre-mRNA 3'-splice site binding	3.07692	0.0391536	Q9S709, Q9FMY5	65	12	19266	49.4	0.893188	0.121811	0.0891833	1.40723
GOTERM_MF_DIRECT	GO:0004407~	histone deacetylase activity	3.07692	0.0550187	Q9FVE6, Q9LZR5	65	17	19266	34.8706	0.957956	0.16216	0.118724	1.25949
GOTERM_MF_DIRECT	GO:0004518~	nuclease activity	3.07692	0.085979	Q9SV09, Q94AD9	65	27	19266	21.9556	0.993491	0.240741	0.176257	1.06561

## Sheet: KEGG Arabidopsis thaliana
Category	Term	Column1	%	PValue	Genes	List Total	Pop Hits	Pop Total	Fold Enrichment	Bonferroni	Benjamini	FDR	Negative LOG10 calculation
KEGG_PATHWAY	ath03040:	Spliceosome	10.7692	3.10045e-06	O81126, Q9LNV5, Q9SJA6, Q9S709, Q9FMY5, Q8VYA5, Q9FYB7	14	192	5240	13.6458	9.30131e-06	9.30134e-06	6.20089e-06	5.50858
KEGG_PATHWAY	ath03030:	DNA replication	6.15385	0.000139059	Q0WVF5, F4KAB8, P43299, Q9LPD9	14	43	5240	34.8173	0.000417119	0.000208588	0.000139059	3.8568
KEGG_PATHWAY	ath04144:	Endocytosis	4.61538	0.0566812	Q9M354, Q9FL69, Q9FVJ3	14	158	5240	7.10669	0.160587	0.0566812	0.0566812	1.24656
