# Supplementary material for: Mining proteomes for zinc finger persulfidation
Source: Royal Society of Chemistry journal article supplement (doi:10.1039/d3cb00106g), 2024-01-01
Supplement: d3cb00106g8.xlsx [file d3cb00106g8.xlsx]

## Sheet: SSH ZFs Gotor
Dataset S1 Gotor1
Entry	Entry name	Protein names	Gene names
F4JL28	EBS_ARATH	Chromatin remodeling protein EBS (Protein EARLY BOLTING IN SHORT DAYS)	EBS At4g22140 F1N20.240
O80996	BRIZ2_ARATH	BRAP2 RING ZnF UBP domain-containing protein 2 (EC 2.3.2.27)	BRIZ2 At2g26000 T19L18.19
O81126	RSZ22_ARATH	Serine/arginine-rich splicing factor RSZ22 (RS-containing zinc finger protein 22) (At-RSZ22) (At-RSZp22) (AtRSZ22)	RSZ22 RSZP22 SRZ22 At4g31580 F28M20.230
Q680Q4	SIZ1_ARATH	E3 SUMO-protein ligase SIZ1 (EC 2.3.2.-) (E3 SUMO-protein transferase SIZ1)	SIZ1 At5g60410 MUF9.5 MUF9.70
Q8LA16	ALFL7_ARATH	PHD finger protein ALFIN-LIKE 7 (Protein AL7)	AL7 At1g14510 F14L17.29 T5E21.1
Q8RWN5	RZ1C_ARATH	Glycine-rich RNA-binding protein RZ1C (AtRZ-1C)	RZ1C At5g04280
Q8VYA5	RSZ33_ARATH	Serine/arginine-rich splicing factor RS2Z33 (RS-containing zinc finger protein 33) (At-RS2Z33) (At-RSZ33) (AtRSZ33)	RS2Z33 RSZ33 At2g37340 F3G5.13
Q9FMY5	U2AFB_ARATH	Splicing factor U2af small subunit B (U2 auxiliary factor 35 kDa subunit B) (U2 small nuclear ribonucleoprotein auxiliary factor small subunit B) (U2 snRNP auxiliary factor small subunit B) (Zinc finger CCCH domain-containing protein 60) (AtC3H60)	U2AF35B AUSB At5g42820 MJB21.20
Q9FVE6	HDT1_ARATH	Histone deacetylase HDT1 (HD-tuins protein 1) (Histone deacetylase 2a) (AtHD2A)	HDT1 HD2A HDA3 At3g44750 T32N15.8
Q9FYB7	RSZ32_ARATH	Serine/arginine-rich splicing factor RS2Z32 (RS-containing zinc finger protein 32) (At-RS2Z32) (At-RSZ32) (AtRSZ32) (Serine/arginine-rich splicing factor RSZ34) (AtRSZ34)	RS2Z32 RSZ32 RSZ34 At3g53500 F4P12.200
Q9LIE5	FHY3_ARATH	Protein FAR-RED ELONGATED HYPOCOTYL 3	FHY3 At3g22170 MKA23.12
Q9LIN3	RZ1A_ARATH	Glycine-rich RNA-binding protein RZ1A (AtRZ-1a)	RZ1A At3g26420 F20C19.15
Q9LZR5	HDT3_ARATH	Histone deacetylase HDT3 (HD-tuins protein 3) (Histone deacetylase 2c)	HDT3 HD2C At5g03740 F17C15_160 MED24.1
Q9M2N5	DSLE_ARATH	Zinc finger BED domain-containing protein DAYSLEEPER (Transposase-like protein DAYSLEEPER)	HAT At3g42170 T27B3.40
Q9S709	U2AFA_ARATH	Splicing factor U2af small subunit A (U2 auxiliary factor 35 kDa subunit A) (U2 small nuclear ribonucleoprotein auxiliary factor small subunit A) (U2 snRNP auxiliary factor small subunit A) (Zinc finger CCCH domain-containing protein 8) (AtC3H8)	U2AF35A AUSA At1g27650 T17H3.14 T22C5.10
O81488	ALFL4_ARATH	PHD finger protein ALFIN-LIKE 4 (Protein AL4)	AL4 At5g26210 F9D12.13 T19G15_60
Q84RR0	ARI7_ARATH	Probable E3 ubiquitin-protein ligase ARI7 (EC 2.3.2.31) (ARIADNE-like protein ARI7) (Protein ariadne homolog 7) (RING-type E3 ubiquitin transferase ARI7)	ARI7 At2g31510 T9H9.3
Q8L829	ARI5_ARATH	Probable E3 ubiquitin-protein ligase ARI5 (EC 2.3.2.31) (ARIADNE-like protein ARI5) (Protein ariadne homolog 5) (RING-type E3 ubiquitin transferase ARI5)	ARI5 At1g05890 T20M3.16
Q947D2	PRAF1_ARATH	PH, RCC1 and FYVE domains-containing protein 1 (Protein Praf4)	PRAF1 PRAF4 At1g76950 F22K20.5
Q9FFF5	ALFL1_ARATH	PHD finger protein ALFIN-LIKE 1 (Protein AL1)	AL1 At5g05610 MOP10.15
Q9SJA6	RZ22A_ARATH	Serine/arginine-rich splicing factor RSZ22A (RS-containing zinc finger protein 22A) (At-RSZ22a) (At-RSZp22a) (AtRSZ22a)	RSZ22A RSZP22A At2g24590 F25P17.11
Q9SRM4	ALFL2_ARATH	PHD finger protein ALFIN-LIKE 2 (Protein AL2) [Cleaved into: PHD finger protein ALFIN-LIKE 2, N-terminally processed]	AL2 At3g11200 F11B9.12 F9F8.2
Q9SY88	CSU1_ARATH	E3 ubiquitin-protein ligase CSU1 (EC 2.3.2.27) (Protein COP1 SUPPRESSOR 1) (RING-type E3 ubiquitin transferase CSU1)	CSU1 At1g61620 T25B24.3
Q9T0J6	DUS3L_ARATH	tRNA-dihydrouridine(47) synthase [NAD(P)(+)]-like (EC 1.3.1.89) (Zinc finger CCCH domain-containing protein 50) (AtC3H50) (mRNA-dihydrouridine synthase DUS3 homolog) (EC 1.3.1.-) (tRNA-dihydrouridine synthase 3-like)	At4g38890 F19H22.4
P93755	C3H30_ARATH	Zinc finger CCCH domain-containing protein 30 (AtC3H30)	At2g41900 T6D20.20
Q8L7S3	C3H24_ARATH	Zinc finger CCCH domain-containing protein 24 (AtC3H24) (EC 2.1.1.-)	At2g28450 T1B3.3
Q8LPN7	RNG1L_ARATH	E3 ubiquitin-protein ligase RING1-like (EC 2.3.2.27) (RING finger protein 1) (RING-type E3 ubiquitin transferase RING1-like)	At3g19950 MPN9.19
Q94AD9	C3H3_ARATH	Zinc finger CCCH domain-containing protein 3 (AtC3H3) (EC 3.1.-.-) (Zinc finger CCCH domain-containing protein ZFN-like 4)	At1g04990 F13M7.1
Q9C7C3	C3H36_ARATH	Zinc finger CCCH domain-containing protein 36 (AtC3H36)	At3g12130 T21B14.5
Q9FNZ1	C3H63_ARATH	Zinc finger CCCH domain-containing protein 63 (AtC3H63) (Zinc finger CCCH domain and WD40 repeat-containing protein 2)	ZFWD2 At5g51980 MSG15.6
Q9LNV5	C3H4_ARATH	Zinc finger CCCH domain-containing protein 4 (AtC3H4)	At1g07360 F22G5.30
Q9LUZ4	C3H66_ARATH	Zinc finger CCCH domain-containing protein 66 (AtC3H66)	At5g58620 MZN1.16 MZN1.8
Q9M2B4	ALFL3_ARATH	PHD finger protein ALFIN-LIKE 3 (Protein AL3)	AL3 At3g42790 T21C14_10
Q9SV09	C3H46_ARATH	Zinc finger CCCH domain-containing protein 46 (AtC3H46) (EC 3.1.-.-)	At3g51950 F4F15.60
Q9ZUM0	C3H17_ARATH	Zinc finger CCCH domain-containing protein 17 (AtC3H17)	At2g02160 F5O4.7
E0X9N4	C3H69_ARATH	Putative RING-type E3 ubiquitin transferase C3H69 (EC 2.3.2.27) (Zinc finger CCCH domain-containing protein 69) (AtC3H69)	At3g63550
Q84W91	C3H32_ARATH	Zinc finger CCCH domain-containing protein 32 (AtC3H32) (Zinc finger CCCH domain-containing protein ZFN-like 1)	At2g47850 F17A22.24
Q84WU9	C3H64_ARATH	Zinc finger CCCH domain-containing protein 64 (AtC3H64)	At5g56900 MHM17.1
Q9C911	JJJ1_ARATH	DNAJ protein JJJ1 homolog (AtJJJ1)	JJJ1 At1g74250 F1O17.8
Q9LQM3	C3H12_ARATH	Zinc finger CCCH domain-containing protein 12 (AtC3H12)	At1g32360 F27G20.10 F5D14.12
Q9SK74	C3H21_ARATH	Zinc finger CCCH domain-containing protein 21 (AtC3H21)	At2g20280 F11A3.17
Q9SQU4	C3H34_ARATH	Zinc finger CCCH domain-containing protein 34 (AtC3H34) (Zinc finger CCCH domain-containing protein ZFN-like 2)	At3g06410 F24P17.12
F4KAB8	MCM6_ARATH	DNA replication licensing factor MCM6[...]	MCM6, At5g44635, K15C23
P43299	MCM7_ARATH	DNA replication licensing factor MCM7[...]	MCM7, PRL, At4g02060, AGAA.2, T10M13.7
Q0WVF5	MCM4_ARATH	DNA replication licensing factor MCM4[...]	MCM4, At2g16440, F16F14.6
Q84JE8	ZDP_ARATH	Polynucleotide 3'-phosphatase ZDP[...]	ZDP, At3g14890, K15M2.3
Q84JU6	HOS1_ARATH	E3 ubiquitin-protein ligase HOS1[...]	HOS1, At2g39810, T5I7.11
Q8H1G0	GAT28_ARATH	GATA transcription factor 28[...]	GATA28, TIFY2A, ZML2, At1g51600, F19C24.17, F5D21.22
Q94B71	OBE3_ARATH	Protein OBERON 3[...]	OBE3, WEN9, At1g14740, F10B6.14
Q9FL69	AGD5_ARATH	ADP-ribosylation factor GTPase-activating protein AGD5[...]	AGD5, MTV4, NEV, ZIG3, ZIGA3, At5g54310, MDK4.13
Q9FVJ3	AGD12_ARATH	ADP-ribosylation factor GTPase-activating protein AGD12[...]	AGD12, ZAC, At4g21160, F7J7.100
Q9LPD9	MCM2_ARATH	DNA replication licensing factor MCM2[...]	MCM2, At1g44900, T12C22.19
Q9M8S7	ARS1_ARATH	Protein ABA AND ROS SENSITIVE 1	ARS1, At3g02860, F13E7.20
Q9SLB9	VOZ2_ARATH	Transcription factor VOZ2[...]	VOZ2, At2g42400, MHK10.12
Q9SUM4	VIL2_ARATH	VIN3-like protein 2[...]	VIL2, VEL1, At4g30200, F9N11.50
Q9ZQ18	REIL2_ARATH	Cytoplasmic 60S subunit biogenesis factor REI1 homolog 2[...]	REIL2, FZF, At2g24500, T28I24.23
Q9ZVD0	SRRT_ARATH	Serrate RNA effector molecule	SE, At2g27100, T20P8.15
Q8H1G5	REIL1_ARATH	Cytoplasmic 60S subunit biogenesis factor REI1 homolog 1[...]	REIL1, At4g31420
Q9LFC0	HAKAI_ARATH	E3 ubiquitin-protein ligase HAKAI homolog[...]	HAKAI, At5g01160, F7J8_140
Q0WVD6	ANM3_ARATH	Probable protein arginine N-methyltransferase 3[...]	PRMT3, At3g12270, F28J15.7
Q8RXE7	AGD14_ARATH	Probable ADP-ribosylation factor GTPase-activating protein AGD14[...]	AGD14, ZIG4, ZIGA4, At1g08680/At1g08690, F22O13.16/F22O13.17
Q9M354	AGD6_ARATH	Probable ADP-ribosylation factor GTPase-activating protein AGD6[...]	AGD6, ZIG2, ZIGA2, At3g53710, F5K20.10
Dataset S3 Gotor1
Entry	Entry name	Protein names	Gene names
F4JL28	EBS_ARATH	Chromatin remodeling protein EBS (Protein EARLY BOLTING IN SHORT DAYS)	EBS At4g22140 F1N20.240
O80996	BRIZ2_ARATH	BRAP2 RING ZnF UBP domain-containing protein 2 (EC 2.3.2.27)	BRIZ2 At2g26000 T19L18.19
O81126	RSZ22_ARATH	Serine/arginine-rich splicing factor RSZ22 (RS-containing zinc finger protein 22) (At-RSZ22) (At-RSZp22) (AtRSZ22)	RSZ22 RSZP22 SRZ22 At4g31580 F28M20.230
Q680Q4	SIZ1_ARATH	E3 SUMO-protein ligase SIZ1 (EC 2.3.2.-) (E3 SUMO-protein transferase SIZ1)	SIZ1 At5g60410 MUF9.5 MUF9.70
Q8LA16	ALFL7_ARATH	PHD finger protein ALFIN-LIKE 7 (Protein AL7)	AL7 At1g14510 F14L17.29 T5E21.1
Q8RWN5	RZ1C_ARATH	Glycine-rich RNA-binding protein RZ1C (AtRZ-1C)	RZ1C At5g04280
Q8VYA5	RSZ33_ARATH	Serine/arginine-rich splicing factor RS2Z33 (RS-containing zinc finger protein 33) (At-RS2Z33) (At-RSZ33) (AtRSZ33)	RS2Z33 RSZ33 At2g37340 F3G5.13
Q9FMY5	U2AFB_ARATH	Splicing factor U2af small subunit B (U2 auxiliary factor 35 kDa subunit B) (U2 small nuclear ribonucleoprotein auxiliary factor small subunit B) (U2 snRNP auxiliary factor small subunit B) (Zinc finger CCCH domain-containing protein 60) (AtC3H60)	U2AF35B AUSB At5g42820 MJB21.20
Q9FVE6	HDT1_ARATH	Histone deacetylase HDT1 (HD-tuins protein 1) (Histone deacetylase 2a) (AtHD2A)	HDT1 HD2A HDA3 At3g44750 T32N15.8
Q9FYB7	RSZ32_ARATH	Serine/arginine-rich splicing factor RS2Z32 (RS-containing zinc finger protein 32) (At-RS2Z32) (At-RSZ32) (AtRSZ32) (Serine/arginine-rich splicing factor RSZ34) (AtRSZ34)	RS2Z32 RSZ32 RSZ34 At3g53500 F4P12.200
Q9LIE5	FHY3_ARATH	Protein FAR-RED ELONGATED HYPOCOTYL 3	FHY3 At3g22170 MKA23.12
Q9LIN3	RZ1A_ARATH	Glycine-rich RNA-binding protein RZ1A (AtRZ-1a)	RZ1A At3g26420 F20C19.15
Q9LZR5	HDT3_ARATH	Histone deacetylase HDT3 (HD-tuins protein 3) (Histone deacetylase 2c)	HDT3 HD2C At5g03740 F17C15_160 MED24.1
Q9M2N5	DSLE_ARATH	Zinc finger BED domain-containing protein DAYSLEEPER (Transposase-like protein DAYSLEEPER)	HAT At3g42170 T27B3.40
Q9M2V1	NCA1_ARATH	Protein NCA1 (NO CATALASE ACTIVITY 1)	NCA1 At3g54360 T12E18.50
Q9S709	U2AFA_ARATH	Splicing factor U2af small subunit A (U2 auxiliary factor 35 kDa subunit A) (U2 small nuclear ribonucleoprotein auxiliary factor small subunit A) (U2 snRNP auxiliary factor small subunit A) (Zinc finger CCCH domain-containing protein 8) (AtC3H8)	U2AF35A AUSA At1g27650 T17H3.14 T22C5.10
Q9S752	LOFG2_ARATH	Probable E3 ubiquitin-protein ligase LOG2 (EC 2.3.2.27) (Probable RING-type E3 ubiquitin transferase LOG2) (Protein LOSS OF GDU2) (RING finger protein 215)	LOG2 RF215 RIG2 At3g09770 F11F8.36 F8A24.18
O81488	ALFL4_ARATH	PHD finger protein ALFIN-LIKE 4 (Protein AL4)	AL4 At5g26210 F9D12.13 T19G15_60
Q84RR0	ARI7_ARATH	Probable E3 ubiquitin-protein ligase ARI7 (EC 2.3.2.31) (ARIADNE-like protein ARI7) (Protein ariadne homolog 7) (RING-type E3 ubiquitin transferase ARI7)	ARI7 At2g31510 T9H9.3
Q8L829	ARI5_ARATH	Probable E3 ubiquitin-protein ligase ARI5 (EC 2.3.2.31) (ARIADNE-like protein ARI5) (Protein ariadne homolog 5) (RING-type E3 ubiquitin transferase ARI5)	ARI5 At1g05890 T20M3.16
Q947D2	PRAF1_ARATH	PH, RCC1 and FYVE domains-containing protein 1 (Protein Praf4)	PRAF1 PRAF4 At1g76950 F22K20.5
Q9FFF5	ALFL1_ARATH	PHD finger protein ALFIN-LIKE 1 (Protein AL1)	AL1 At5g05610 MOP10.15
Q9SJA6	RZ22A_ARATH	Serine/arginine-rich splicing factor RSZ22A (RS-containing zinc finger protein 22A) (At-RSZ22a) (At-RSZp22a) (AtRSZ22a)	RSZ22A RSZP22A At2g24590 F25P17.11
Q9SRM4	ALFL2_ARATH	PHD finger protein ALFIN-LIKE 2 (Protein AL2) [Cleaved into: PHD finger protein ALFIN-LIKE 2, N-terminally processed]	AL2 At3g11200 F11B9.12 F9F8.2
Q9SY88	CSU1_ARATH	E3 ubiquitin-protein ligase CSU1 (EC 2.3.2.27) (Protein COP1 SUPPRESSOR 1) (RING-type E3 ubiquitin transferase CSU1)	CSU1 At1g61620 T25B24.3
Q9T0J6	DUS3L_ARATH	tRNA-dihydrouridine(47) synthase [NAD(P)(+)]-like (EC 1.3.1.89) (Zinc finger CCCH domain-containing protein 50) (AtC3H50) (mRNA-dihydrouridine synthase DUS3 homolog) (EC 1.3.1.-) (tRNA-dihydrouridine synthase 3-like)	At4g38890 F19H22.4
P93755	C3H30_ARATH	Zinc finger CCCH domain-containing protein 30 (AtC3H30)	At2g41900 T6D20.20
Q8L7S3	C3H24_ARATH	Zinc finger CCCH domain-containing protein 24 (AtC3H24) (EC 2.1.1.-)	At2g28450 T1B3.3
Q8LPN7	RNG1L_ARATH	E3 ubiquitin-protein ligase RING1-like (EC 2.3.2.27) (RING finger protein 1) (RING-type E3 ubiquitin transferase RING1-like)	At3g19950 MPN9.19
Q94AD9	C3H3_ARATH	Zinc finger CCCH domain-containing protein 3 (AtC3H3) (EC 3.1.-.-) (Zinc finger CCCH domain-containing protein ZFN-like 4)	At1g04990 F13M7.1
Q9C7C3	C3H36_ARATH	Zinc finger CCCH domain-containing protein 36 (AtC3H36)	At3g12130 T21B14.5
Q9FNZ1	C3H63_ARATH	Zinc finger CCCH domain-containing protein 63 (AtC3H63) (Zinc finger CCCH domain and WD40 repeat-containing protein 2)	ZFWD2 At5g51980 MSG15.6
Q9LNV5	C3H4_ARATH	Zinc finger CCCH domain-containing protein 4 (AtC3H4)	At1g07360 F22G5.30
Q9LUZ4	C3H66_ARATH	Zinc finger CCCH domain-containing protein 66 (AtC3H66)	At5g58620 MZN1.16 MZN1.8
Q9M2B4	ALFL3_ARATH	PHD finger protein ALFIN-LIKE 3 (Protein AL3)	AL3 At3g42790 T21C14_10
Q9SV09	C3H46_ARATH	Zinc finger CCCH domain-containing protein 46 (AtC3H46) (EC 3.1.-.-)	At3g51950 F4F15.60
Q9ZUM0	C3H17_ARATH	Zinc finger CCCH domain-containing protein 17 (AtC3H17)	At2g02160 F5O4.7
E0X9N4	C3H69_ARATH	Putative RING-type E3 ubiquitin transferase C3H69 (EC 2.3.2.27) (Zinc finger CCCH domain-containing protein 69) (AtC3H69)	At3g63550
Q84W91	C3H32_ARATH	Zinc finger CCCH domain-containing protein 32 (AtC3H32) (Zinc finger CCCH domain-containing protein ZFN-like 1)	At2g47850 F17A22.24
Q84WU9	C3H64_ARATH	Zinc finger CCCH domain-containing protein 64 (AtC3H64)	At5g56900 MHM17.1
Q9C911	JJJ1_ARATH	DNAJ protein JJJ1 homolog (AtJJJ1)	JJJ1 At1g74250 F1O17.8
Q9LQM3	C3H12_ARATH	Zinc finger CCCH domain-containing protein 12 (AtC3H12)	At1g32360 F27G20.10 F5D14.12
Q9SK74	C3H21_ARATH	Zinc finger CCCH domain-containing protein 21 (AtC3H21)	At2g20280 F11A3.17
Q9SQU4	C3H34_ARATH	Zinc finger CCCH domain-containing protein 34 (AtC3H34) (Zinc finger CCCH domain-containing protein ZFN-like 2)	At3g06410 F24P17.12
F4KAB8	MCM6_ARATH	DNA replication licensing factor MCM6 (EC 3.6.4.12) (Minichromosome maintenance protein 6) (AtMCM6)	MCM6 At5g44635 K15C23
P43299	MCM7_ARATH	DNA replication licensing factor MCM7 (EC 3.6.4.12) (Minichromosome maintenance protein 7) (AtMCM7) (Protein PROLIFERA)	MCM7 PRL At4g02060 AGAA.2 T10M13.7
Q0WVF5	MCM4_ARATH	DNA replication licensing factor MCM4 (EC 3.6.4.12) (Minichromosome maintenance protein 4) (AtMCM4)	MCM4 At2g16440 F16F14.6
Q84JE8	ZDP_ARATH	Polynucleotide 3'-phosphatase ZDP (EC 3.1.3.32) (DNA nick sensor protein)	ZDP At3g14890 K15M2.3
Q84JU6	HOS1_ARATH	E3 ubiquitin-protein ligase HOS1 (EC 2.3.2.27) (Protein HIGH EXPRESSION OF OSMOTICALLY RESPONSIVE GENE 1) (RING finger protein HOS1) (RING-type E3 ubiquitin transferase HOS1)	HOS1 At2g39810 T5I7.11
Q8H1G0	GAT28_ARATH	GATA transcription factor 28 (Protein TIFY 2A) (ZIM-like 2 protein)	GATA28 TIFY2A ZML2 At1g51600 F19C24.17 F5D21.22
Q94B71	OBE3_ARATH	Protein OBERON 3 (Protein TITANIA 1) (Protein WUS ENHANCER 9)	OBE3 WEN9 At1g14740 F10B6.14
Q9FL69	AGD5_ARATH	ADP-ribosylation factor GTPase-activating protein AGD5 (ARF GAP AGD5) (Protein ARF-GAP DOMAIN 5) (AtAGD5) (Protein MODIFIED TRANSPORT TO THE VACUOLE 4) (Protein NEVERSHED) (Protein ZIGA3)	AGD5 MTV4 NEV ZIG3 ZIGA3 At5g54310 MDK4.13
Q9FVJ3	AGD12_ARATH	ADP-ribosylation factor GTPase-activating protein AGD12 (ARF GAP AGD12) (Protein ARF-GAP DOMAIN 12) (AtAGD12) (Zinc- and calcium-binding protein) (AtZAC)	AGD12 ZAC At4g21160 F7J7.100
Q9LPD9	MCM2_ARATH	DNA replication licensing factor MCM2 (EC 3.6.4.12) (Minichromosome maintenance protein 2) (AtMCM2)	MCM2 At1g44900 T12C22.19
Q9M8S7	ARS1_ARATH	Protein ABA AND ROS SENSITIVE 1	ARS1 At3g02860 F13E7.20
Q9SLB9	VOZ2_ARATH	Transcription factor VOZ2 (Protein VASCULAR PLANT ONE-ZINC FINGER 2) (AtVOZ2)	VOZ2 At2g42400 MHK10.12
Q9SUM4	VIL2_ARATH	VIN3-like protein 2 (Vernalization5/VIN3-like protein 1)	VIL2 VEL1 At4g30200 F9N11.50
Q9ZQ18	REIL2_ARATH	Cytoplasmic 60S subunit biogenesis factor REI1 homolog 2 (Protein REI1-LIKE 2) (pre-60S factor REI1 homolog 2)	REIL2 FZF At2g24500 T28I24.23
Q9ZVD0	SRRT_ARATH	Serrate RNA effector molecule	SE At2g27100 T20P8.15
Q8H1G5	REIL1_ARATH	Cytoplasmic 60S subunit biogenesis factor REI1 homolog 1 (Protein REI1-LIKE 1) (pre-60S factor REI1 homolog 1)	REIL1 At4g31420
Q9LFC0	HAKAI_ARATH	E3 ubiquitin-protein ligase HAKAI homolog (EC 2.3.2.27) (RING-type E3 ubiquitin transferase HAKAI)	HAKAI At5g01160 F7J8_140
Q0WVD6	ANM3_ARATH	Probable protein arginine N-methyltransferase 3 (EC 2.1.1.-)	PRMT3 At3g12270 F28J15.7
Q8RXE7	AGD14_ARATH	Probable ADP-ribosylation factor GTPase-activating protein AGD14 (ARF GAP AGD14) (Protein ARF-GAP DOMAIN 14) (AtAGD14) (Protein ZIGA4)	AGD14 ZIG4 ZIGA4 At1g08680/At1g08690 F22O13.16/F22O13.17
Q9M354	AGD6_ARATH	Probable ADP-ribosylation factor GTPase-activating protein AGD6 (ARF GAP AGD6) (Protein ARF-GAP DOMAIN 6) (AtAGD6) (Protein ZIGA2)	AGD6 ZIG2 ZIGA2 At3g53710 F5K20.10

## Sheet: SSH ZFs Romero
supplementary_table_s8_Romero
Entry	Entry name	Protein names	Gene names	Organism
Q9LIN3	RZ1A_ARATH	Glycine-rich RNA-binding protein RZ1A (AtRZ-1a)	RZ1A At3g26420 F20C19.15	Arabidopsis thaliana (Mouse-ear cress)
Q9T0J6	DUS3L_ARATH	tRNA-dihydrouridine(47) synthase [NAD(P)(+)]-like (EC 1.3.1.89) (Zinc finger CCCH domain-containing protein 50) (AtC3H50) (mRNA-dihydrouridine synthase DUS3 homolog) (EC 1.3.1.-) (tRNA-dihydrouridine synthase 3-like)	At4g38890 F19H22.4	Arabidopsis thaliana (Mouse-ear cress)
O81488	ALFL4_ARATH	PHD finger protein ALFIN-LIKE 4 (Protein AL4)	AL4 At5g26210 F9D12.13 T19G15_60	Arabidopsis thaliana (Mouse-ear cress)
Q9LHF0	ZHD9_ARATH	Zinc-finger homeodomain protein 9 (AtZHD9) (Homeobox protein 34) (AtHB-34)	ZHD9 HB34 At3g28920 MYI13.1	Arabidopsis thaliana (Mouse-ear cress)
Q9M354	AGD6_ARATH	Probable ADP-ribosylation factor GTPase-activating protein AGD6 (ARF GAP AGD6) (Protein ARF-GAP DOMAIN 6) (AtAGD6) (Protein ZIGA2)	AGD6 ZIG2 ZIGA2 At3g53710 F5K20.10	Arabidopsis thaliana (Mouse-ear cress)
