# Supplementary material for: Mining proteomes for zinc finger persulfidation
Source: Royal Society of Chemistry journal article supplement (doi:10.1039/d3cb00106g), 2024-01-01
Supplement: d3cb00106g9.xlsx [file d3cb00106g9.xlsx]

## Sheet: SSH ZFs  Hatzoglou
ATF4 Expressing INS1 depletion of CTH
Entry	Entry Name	Protein names	Gene Names	Organism
D3ZD32	CHD5_RAT	Chromodomain-helicase-DNA-binding protein 5 (CHD-5) (EC 3.6.4.12) (ATP-dependent helicase CHD5)	Chd5	Rattus norvegicus (Rat)
O08629	TIF1B_RAT	Transcription intermediary factor 1-beta (TIF1-beta) (E3 SUMO-protein ligase TRIM28) (EC 2.3.2.27) (KRAB-associated protein 1) (Nuclear corepressor KAP-1) (RING-type E3 ubiquitin transferase TIF1-beta) (Tripartite motif-containing protein 28)	Trim28 Kap1 Tif1b	Rattus norvegicus (Rat)
O70467	ANM3_RAT	Protein arginine N-methyltransferase 3 (EC 2.1.1.319) (Heterogeneous nuclear ribonucleoprotein methyltransferase-like protein 3)	Prmt3 Hrmt1l3	Rattus norvegicus (Rat)
P62634	CNBP_RAT	CCHC-type zinc finger nucleic acid binding protein (Cellular nucleic acid-binding protein) (CNBP) (Zinc finger protein 9)	Cnbp Znf9	Rattus norvegicus (Rat)
P63281	UBC9_RAT	SUMO-conjugating enzyme UBC9 (EC 2.3.2.-) (RING-type E3 SUMO transferase UBC9) (SUMO-protein ligase) (Ubiquitin carrier protein 9) (Ubiquitin carrier protein I) (Ubiquitin-conjugating enzyme E2 I) (Ubiquitin-conjugating enzyme UbcE2A) (Ubiquitin-protein ligase I)	Ube2i Ubce9	Rattus norvegicus (Rat)
Q9ES54	NPL4_RAT	Nuclear protein localization protein 4 homolog (Protein NPL4)	Nploc4 Npl4	Rattus norvegicus (Rat)
Q9R1D1	CTCF_RAT	Transcriptional repressor CTCF (11-zinc finger protein) (CCCTC-binding factor) (CTCFL paralog)	Ctcf	Rattus norvegicus (Rat)
Q9Z272	GIT1_RAT	ARF GTPase-activating protein GIT1 (ARF GAP GIT1) (Cool-associated and tyrosine-phosphorylated protein 1) (CAT-1) (CAT1) (G protein-coupled receptor kinase-interactor 1) (GRK-interacting protein 1) (GRK-interactor 1)	Git1	Rattus norvegicus (Rat)
Q2TL32	UBR4_RAT	E3 ubiquitin-protein ligase UBR4 (EC 2.3.2.27) (N-recognin-4) (RING-type E3 ubiquitin transferase UBR4) (Zinc finger UBR1-type protein 1)	Ubr4 Rbaf600 Zubr1	Rattus norvegicus (Rat)
Q4V7D7	RBM22_RAT	Pre-mRNA-splicing factor RBM22 (RNA-binding motif protein 22)	Rbm22	Rattus norvegicus (Rat)
Q562A2	ZFR_RAT	Zinc finger RNA-binding protein	Zfr	Rattus norvegicus (Rat)
Q7TP17	U2AF4_RAT	Splicing factor U2AF 26 kDa subunit (Liver regeneration-related protein LRRG157/LRRG158) (U2 auxiliary factor 26) (U2 small nuclear RNA auxiliary factor 1-like protein 4) (U2AF1-like 4)	U2af1l4 Cb2-806 Cb2-807	Rattus norvegicus (Rat)
Q4KLI1	ZKSC1_RAT	Zinc finger protein with KRAB and SCAN domains 1	Zkscan1	Rattus norvegicus (Rat)
INS1 expressed ATF4 Copy
Entry	Entry Name	Protein names	Gene Names	Organism
O08629	TIF1B_RAT	Transcription intermediary factor 1-beta (TIF1-beta) (E3 SUMO-protein ligase TRIM28) (EC 2.3.2.27) (KRAB-associated protein 1) (Nuclear corepressor KAP-1) (RING-type E3 ubiquitin transferase TIF1-beta) (Tripartite motif-containing protein 28)	Trim28 Kap1 Tif1b	Rattus norvegicus (Rat)
O54880	RPH3L_RAT	Rab effector Noc2 (No C2 domains protein) (Rabphilin-3A-like protein)	Rph3al Noc2	Rattus norvegicus (Rat)
P27008	PARP1_RAT	Poly [ADP-ribose] polymerase 1 (PARP-1) (EC 2.4.2.30) (ADP-ribosyltransferase diphtheria toxin-like 1) (ARTD1) (DNA ADP-ribosyltransferase PARP1) (EC 2.4.2.-) (NAD(+) ADP-ribosyltransferase 1) (ADPRT 1) (Poly[ADP-ribose] synthase 1) (Protein poly-ADP-ribosyltransferase PARP1) (EC 2.4.2.-) [Cleaved into: Poly [ADP-ribose] polymerase 1, processed C-terminus (Poly [ADP-ribose] polymerase 1, 89-kDa f…	Parp1 Adprt	Rattus norvegicus (Rat)
P62634	CNBP_RAT	CCHC-type zinc finger nucleic acid binding protein (Cellular nucleic acid-binding protein) (CNBP) (Zinc finger protein 9)	Cnbp Znf9	Rattus norvegicus (Rat)
P63281	UBC9_RAT	SUMO-conjugating enzyme UBC9 (EC 2.3.2.-) (RING-type E3 SUMO transferase UBC9) (SUMO-protein ligase) (Ubiquitin carrier protein 9) (Ubiquitin carrier protein I) (Ubiquitin-conjugating enzyme E2 I) (Ubiquitin-conjugating enzyme UbcE2A) (Ubiquitin-protein ligase I)	Ube2i Ubce9	Rattus norvegicus (Rat)
Q63679	KDM3A_RAT	Lysine-specific demethylase 3A (EC 1.14.11.65) (JmjC domain-containing histone demethylation protein 2A) (Jumonji domain-containing protein 1A) (Testis-specific gene A protein) (Zinc finger protein TSGA) ([histone H3]-dimethyl-L-lysine(9) demethylase 3A)	Kdm3a Jhdm2a Jmjd1a Tsga	Rattus norvegicus (Rat)
Q8CG07	WRIP1_RAT	ATPase WRNIP1 (EC 3.6.1.-) (Werner helicase-interacting protein 1)	Wrnip1 Wrnip	Rattus norvegicus (Rat)
Q8VHQ7	SYTL4_RAT	Synaptotagmin-like protein 4 (Exophilin-2) (Granuphilin)	Sytl4	Rattus norvegicus (Rat)
Q9ES54	NPL4_RAT	Nuclear protein localization protein 4 homolog (Protein NPL4)	Nploc4 Npl4	Rattus norvegicus (Rat)
Q9JK25	CLIP1_RAT	CAP-Gly domain-containing linker protein 1 (Cytoplasmic linker protein 170) (CLIP-170) (Restin)	Clip1 Cyln1 Rsn	Rattus norvegicus (Rat)
Q9JKL8	ADNP_RAT	Activity-dependent neuroprotector homeobox protein (Activity-dependent neuroprotective protein)	Adnp	Rattus norvegicus (Rat)
Q9R1D1	CTCF_RAT	Transcriptional repressor CTCF (11-zinc finger protein) (CCCTC-binding factor) (CTCFL paralog)	Ctcf	Rattus norvegicus (Rat)
Q9Z330	DNMT1_RAT	DNA (cytosine-5)-methyltransferase 1 (Dnmt1) (EC 2.1.1.37) (DNA MTase RnoIP) (M.RnoIP) (DNA methyltransferase I) (MCMT)	Dnmt1	Rattus norvegicus (Rat)
O35986	ZRAB2_RAT	Zinc finger Ran-binding domain-containing protein 2 (Zinc finger protein 265) (Zinc finger, splicing)	Zranb2 Zfp265 Zis Znf265	Rattus norvegicus (Rat)
Q2TL32	UBR4_RAT	E3 ubiquitin-protein ligase UBR4 (EC 2.3.2.27) (N-recognin-4) (RING-type E3 ubiquitin transferase UBR4) (Zinc finger UBR1-type protein 1)	Ubr4 Rbaf600 Zubr1	Rattus norvegicus (Rat)
Q4V7D7	RBM22_RAT	Pre-mRNA-splicing factor RBM22 (RNA-binding motif protein 22)	Rbm22	Rattus norvegicus (Rat)
Q7TP17	U2AF4_RAT	Splicing factor U2AF 26 kDa subunit (Liver regeneration-related protein LRRG157/LRRG158) (U2 auxiliary factor 26) (U2 small nuclear RNA auxiliary factor 1-like protein 4) (U2AF1-like 4)	U2af1l4 Cb2-806 Cb2-807	Rattus norvegicus (Rat)
