# Supplementary material for: Mining proteomes for zinc finger persulfidation
Source: Royal Society of Chemistry journal article supplement (doi:10.1039/d3cb00106g), 2024-01-01
Supplement: d3cb00106g10.xlsx [file d3cb00106g10.xlsx]

## Sheet: SSH ZFs Lee
Table S3
Entry	Entry name	Protein names	Gene names	Organism
R1BJC4	R1BJC4_EMIHU	Uncharacterized protein	EMIHUDRAFT_96831	Emiliania huxleyi (Pontosphaera huxleyi)
R1EPB4	R1EPB4_EMIHU	TRAF-type domain-containing protein	EMIHUDRAFT_115769	Emiliania huxleyi (Pontosphaera huxleyi)
R1F9N7	R1F9N7_EMIHU	Uncharacterized protein	EMIHUDRAFT_113502	Emiliania huxleyi (Pontosphaera huxleyi)
R1FQ60	R1FQ60_EMIHU	Uncharacterized protein	EMIHUDRAFT_199525	Emiliania huxleyi (Pontosphaera huxleyi)
