# Supplementary material for: Mining proteomes for zinc finger persulfidation
Source: Royal Society of Chemistry journal article supplement (doi:10.1039/d3cb00106g), 2024-01-01
Supplement: d3cb00106g11.xlsx [file d3cb00106g11.xlsx]

## Sheet: Human_GO_BP
Category	Term	Column1	%	PValue	Genes	List Total	Pop Hits	Pop Total	Fold Enrichment	Bonferroni	Benjamini	FDR	Negativelog(10)
GOTERM_BP_DIRECT	GO:0006412	translation	4.5045	0.000359922	P61927, P42677, Q71UM5, A6NKH3, P61513	78	9	1762	12.5499	0.195418	0.145034	0.144794	3.44379
GOTERM_BP_DIRECT	GO:0006397	mRNA processing	7.20721	0.000480245	F8WEA1, A8MUK0, Q16629, A8MTP4, Q5BKZ1, Q15428, C9JAB2, F8W6K1, Q99590, H7BZM7, O60870, A0A0A0MRN4, A0A0B4J1Z1, Q5VZF2, Q9UNY4	78	34	1762	5.31523	0.251839	0.145034	0.144794	3.31854
GOTERM_BP_DIRECT	GO:0002181	cytoplasmic translation	3.6036	0.000753815	P61927, P42677, Q8WU90, P61513	78	5	1762	18.0718	0.365854	0.151768	0.151517	3.12274
GOTERM_BP_DIRECT	GO:0045087	innate immune response	10.8108	0.00179681	A0A3B3IUA7, Q14258, Q12933, O75679, Q96S55, Q7Z2W4, H3BT57, Q9NX58, Q9NW08, P43243, Q13263, P09874, Q92974	78	93	1762	2.91481	0.662521	0.252631	0.252213	2.7455
GOTERM_BP_DIRECT	GO:0008380	RNA splicing	6.30631	0.00209132	F8WEA1, A8MUK0, Q16629, A8MTP4, Q5BKZ1, Q15428, C9JAB2, F8W6K1, Q99590, H7BZM7, A0A0A0MRN4, A0A0B4J1Z1, Q5VZF2, Q9UNY4	78	32	1762	4.94151	0.717613	0.252631	0.252213	2.67958
GOTERM_BP_DIRECT	GO:1901798	positive regulation of signal transduction by p53 class mediator	2.7027	0.00549723	P61927, H3BT57, Q8TDI0, F2Z2R5	78	3	1762	22.5897	0.964188	0.480989	0.480192	2.25986
GOTERM_BP_DIRECT	GO:0006457	protein folding	3.6036	0.00557437	P31689, P49792, O60884, Q96EY1	78	9	1762	10.0399	0.965828	0.480989	0.480192	2.2538
GOTERM_BP_DIRECT	GO:0007026	negative regulation of microtubule depolymerization	2.7027	0.0106831	A0A2R8YDE6, O15344, Q9UBN7, Q92974	78	4	1762	16.9423	0.998477	0.716956	0.715769	1.9713
GOTERM_BP_DIRECT	GO:0009408	response to heat	2.7027	0.0106831	P31689, O60884, Q96EY1	78	4	1762	16.9423	0.998477	0.716956	0.715769	1.9713
GOTERM_BP_DIRECT	GO:0010332	response to gamma radiation	2.7027	0.0173027	P22681, H3BT57, P09874	78	5	1762	13.5538	0.999974	1	1	1.76189
GOTERM_BP_DIRECT	GO:0000245	spliceosomal complex assembly	2.7027	0.0252239	A8MUK0, Q15637, A8MTP4, Q15428, F8W6K1, Q99590	78	6	1762	11.2949	1	1	1	1.59819
GOTERM_BP_DIRECT	GO:0006919	activation of cysteine-type endopeptidase activity involved in apoptotic process	2.7027	0.0252239	Q71UM5, H3BT57, Q96EY1	78	6	1762	11.2949	1	1	1	1.59819
GOTERM_BP_DIRECT	GO:1990830	cellular response to leukemia inhibitory factor	3.6036	0.0298022	F8WEA1, A0A3B3IUA7, Q14258, Q16629, H3BT57, C9JAB2, P13631, A0A0B4J1Z1	78	16	1762	5.64744	1	1	1	1.52575
GOTERM_BP_DIRECT	GO:0007283	spermatogenesis	5.40541	0.0366726	P31689, Q9H0H5, Q01954, P52594, Q9Y508, Q8IXK0	78	43	1762	3.15206	1	1	1	1.43566
GOTERM_BP_DIRECT	GO:0031397	negative regulation of protein ubiquitination	2.7027	0.0444857	P31689, P61927, Q13501	78	8	1762	8.47115	1	1	1	1.35178
GOTERM_BP_DIRECT	GO:0006606	protein import into nucleus	2.7027	0.0556033	Q13501, Q96QC0, H3BT57	78	9	1762	7.52991	1	1	1	1.2549
GOTERM_BP_DIRECT	GO:0010976	positive regulation of neuron projection development	2.7027	0.0675754	Q7Z570, Q15428, Q9H2P0	78	10	1762	6.77692	1	1	1	1.17021
GOTERM_BP_DIRECT	GO:0000398	mRNA splicing, via spliceosome	3.6036	0.0758204	F8WEA1, Q16629, Q15637, Q15428, C9JAB2, P09234, A0A0B4J1Z1	78	23	1762	3.92865	1	1	1	1.12021
GOTERM_BP_DIRECT	GO:0016925	protein sumoylation	3.6036	0.0758204	P49792, O75925, H3BT57, Q13263	78	23	1762	3.92865	1	1	1	1.12021
GOTERM_BP_DIRECT	GO:0006268	DNA unwinding involved in DNA replication	1.8018	0.0855147	P27694, P49736	78	2	1762	22.5897	1	1	1	1.06796
GOTERM_BP_DIRECT	GO:0000028	ribosomal small subunit assembly	1.8018	0.0855147	P42677, Q71UM5	78	2	1762	22.5897	1	1	1	1.06796
GOTERM_BP_DIRECT	GO:0006511	ubiquitin-dependent protein catabolic process	7.20721	0.0979741	Q13501, A0A3B3IUA7, Q5T4S7, Q14258, F8WEU8, P22681, Q9Y4X5, Q9UBF6, Q9Y508, A0A0A0MSW0, O95376	78	91	1762	1.98591	1	1	1	1.00889

## Sheet: Human_GO_MF
Category	Term	Column1	%	PValue	Genes	List Total	Pop Hits	Pop Total	Fold Enrichment	Bonferroni	Benjamini	FDR	Negativelog(10)
GOTERM_MF_DIRECT	GO:0003723	RNA binding	26.1261	1.4437e-11	P61927, A0A3B3IUA7, Q8IWS0, Q16629, A0A7I2YQA8, P52594, Q96QC0, Q71UM5, A8MTP4, Q15637, F8W6K1, Q12986, Q8WU90, Q99590, Q01844, P09234, A0A7I2YQQ0, P62633, P09874, Q13263, A0A0D9SGE8, P26358, P49792, A8MUK0, F8WEA1, Q14258, P30876, Q5BKZ1, Q15428, C9JAB2, D6RAT4, A0A7I2V5F6, A0A7I2V5D0, A0A7I2V5F1, P42677, Q7Z2W4, A0A7I2V490, Q9NX58, O60870, P43243, P20042, A0A7I2V311, A0A0A0MRN4, P61513, A0A0B4J…	79	166	1847	4.08441	2.85853e-09	2.85853e-09	2.75747e-09	10.8405
GOTERM_MF_DIRECT	GO:0003735	structural constituent of ribosome	4.5045	4.14716e-05	P61927, P42677, Q71UM5, A6NKH3, P61513	79	6	1847	19.4831	0.00817792	0.00410569	0.00396054	4.38225
GOTERM_MF_DIRECT	GO:0019899	enzyme binding	9.00901	0.00013974	Q13501, O75925, Q8IWS0, Q12933, A0A2R8YDE6, O15344, Q9GZT9, Q9UBN7, Q9H7Z6, P49736, P09874, A0A0D9SGE8	79	49	1847	4.77138	0.0272911	0.00922284	0.00889678	3.85468
GOTERM_MF_DIRECT	GO:0005515	protein binding	60.3604	0.00035161	O95159, A0A3B3IUA7, Q8IWS0, Q16629, P29375, Q96QC0, P52594, Q71UM5, Q9UBF6, Q96B54, Q12986, Q9Y508, Q8WU90, Q8TDI0, Q9BRR0, Q01844, O60884, H3BT57, P62633, P49736, A0A0D9SGE8, Q92974, F8WEA1, Q9H0H5, A8MUK0, P31689, Q14258, Q13642, P30876, Q9Y4X5, Q15428, A0A2R8YDE6, M0QXZ5, A0A7I2V5F6, P13631, Q9H7Z6, H0YDG9, Q9H2P0, A0A7I2V5F1, Q96S55, Q7Z2W4, F8WEU8, F2Z2R5, P20042, H0YCN2, A0A7I2V311, P61513,…	79	1243	1847	1.26021	0.0672621	0.0174047	0.0167894	3.45394
GOTERM_MF_DIRECT	GO:0045296	cadherin binding	3.6036	0.000682054	A0A3B3IUA7, Q14258, Q7Z2W4, P22681, Q8WU90	79	5	1847	18.7038	0.126365	0.0257144	0.0248053	3.16618
GOTERM_MF_DIRECT	GO:0031625	ubiquitin protein ligase binding	8.10811	0.000779224	P31689, Q13501, O75925, Q12933, H3BT57, Q9Y4X5, A0A2R8YDE6, O15344, Q9UBN7, Q13263	79	49	1847	4.29424	0.143025	0.0257144	0.0248053	3.10834
GOTERM_MF_DIRECT	GO:0016787	hydrolase activity	3.6036	0.0050653	A0A2R8YDE6, Q14839, Q8TDI0, F2Z2R5, Q9UBN7, Q9UNY4	79	9	1847	10.391	0.634131	0.127201	0.122704	2.29539
GOTERM_MF_DIRECT	GO:0048487	beta-tubulin binding	2.7027	0.00513943	Q9H0H5, A0A2R8YDE6, Q9UBN7, Q9H2P0	79	3	1847	23.3797	0.639488	0.127201	0.122704	2.28909
GOTERM_MF_DIRECT	GO:0008017	microtubule binding	3.6036	0.00935852	Q9H0H5, A0A2R8YDE6, O15344, Q9UBN7, Q92974	79	11	1847	8.50173	0.844594	0.205888	0.198609	2.02879
GOTERM_MF_DIRECT	GO:0042393	histone binding	7.20721	0.0115751	Q8IWS0, Q96T23, P29375, Q14839, Q8TDI0, F2Z2R5, Q8IXK0, H0YCN2, Q9H7Z6, P49736, A0A0D9SGE8, H0YDG9	79	60	1847	3.1173	0.900265	0.229187	0.221085	1.93647
GOTERM_MF_DIRECT	GO:0003677	DNA binding	25.2252	0.0127765	O95159, O75925, Q8IWS0, Q14588, P27694, P29375, A0A7I2YQA8, P52594, Q96QC0, Q969J2, Q8TDI0, Q8IXK0, Q9BRR0, H3BT57, Q9NW08, A0A7I2YQQ0, P49736, P09874, Q13263, A0A0D9SGE8, Q9UNY4, P26358, P30876, Q5BKZ1, Q14839, A0A7I2V5F6, P13631, A0A7I2V5D0, Q9H2P0, A0A7I2V5F1, Q96S55, P42677, A0A7I2V490, Q9NX58, O60870, F2Z2R5, A0A7I2V311, A0A0A0MRN4	79	428	1847	1.52952	0.921608	0.229976	0.221846	1.89359
GOTERM_MF_DIRECT	GO:0051082	unfolded protein binding	2.7027	0.0162077	P31689, O60884, Q96EY1	79	5	1847	14.0278	0.960656	0.267428	0.257973	1.79028
GOTERM_MF_DIRECT	GO:0030544	Hsp70 protein binding	2.7027	0.0236503	P31689, O60884, Q96EY1	79	6	1847	11.6899	0.991253	0.354684	0.342145	1.62616
GOTERM_MF_DIRECT	GO:0003682	chromatin binding	9.00901	0.0250787	P30876, A0A7I2YQA8, Q14839, Q8TDI0, A0A7I2V5F6, Q8IXK0, P13631, Q9BRR0, A0A7I2V5D0, Q9H2P0, A0A7I2V5F1, A0A7I2V490, F2Z2R5, A0A7I2V311, A0A7I2YQQ0, Q13263, P09874, P26358	79	102	1847	2.29213	0.993454	0.354684	0.342145	1.6007
GOTERM_MF_DIRECT	GO:0019789	SUMO transferase activity	3.6036	0.0272797	P49792, O75925, H3BT57, Q13263	79	16	1847	5.84494	0.995816	0.360092	0.347361	1.56416
GOTERM_MF_DIRECT	GO:0030971	receptor tyrosine kinase binding	2.7027	0.0322127	Q13501, H7BZM7, P22681	79	7	1847	10.0199	0.998471	0.398632	0.384539	1.49197
GOTERM_MF_DIRECT	GO:0003729	mRNA binding	4.5045	0.0349976	F8WEA1, Q16629, Q15637, C9JAB2, P09234, D6RAT4, P20042, P62633, A0A0B4J1Z1	79	30	1847	3.89662	0.999136	0.400405	0.386249	1.45596
GOTERM_MF_DIRECT	GO:0042802	identical protein binding	11.7117	0.0370523	Q13501, Q12933, Q15637, Q969J2, Q8IXK0, Q96S55, Q01844, Q14192, H3BT57, Q9NX58, P43243, O15344, P09874	79	163	1847	1.86464	0.999433	0.400405	0.386249	1.43118
GOTERM_MF_DIRECT	GO:0003714	transcription corepressor activity	5.40541	0.0384227	O75925, Q14192, Q15637, Q7Z5L9, Q14839, Q13263	79	45	1847	3.1173	0.999573	0.400405	0.386249	1.41541
GOTERM_MF_DIRECT	GO:0005524	ATP binding	7.20721	0.0430544	Q96S55, P31689, O60884, Q14839, Q96EY1, Q8TDI0, F2Z2R5, P49736, Q9UNY4	79	78	1847	2.39792	0.999836	0.406524	0.392152	1.36598
GOTERM_MF_DIRECT	GO:0016887	ATPase activity	3.6036	0.0431162	Q96S55, Q14839, Q8TDI0, F2Z2R5, P49736	79	19	1847	4.92205	0.999838	0.406524	0.392152	1.36536
GOTERM_MF_DIRECT	GO:0008270	zinc ion binding	27.027	0.0465915	O95159, O75925, Q16629, P29375, A0A7I2YQA8, Q9UBF6, Q15637, Q12986, A0A0A0MSW0, Q8IXK0, O95376, H7BZM7, H7BYG8, H3BT57, P09234, A0A7I2YQQ0, P62633, P09874, Q13263, Q9UNY4, Q92974, P26358, F8WEA1, Q13501, Q5T4S7, Q12933, Q9Y4X5, Q15428, C9JAB2, A0A2R8YDE6, D6RAT4, Q14839, A0A7I2V5F6, P13631, A0A7I2V5D0, A0A7I2V5F1, P42677, F8WEU8, A0A7I2V490, P43243, O15344, A0A7I2V311, Q9UBN7, A0A0B4J1Z1	79	518	1847	1.35404	0.999921	0.419323	0.404499	1.33169
GOTERM_MF_DIRECT	GO:0003678	DNA helicase activity	2.7027	0.0522821	Q14839, Q8TDI0, F2Z2R5, P49736	79	9	1847	7.79325	0.999976	0.434289	0.418935	1.28165
GOTERM_MF_DIRECT	GO:0003712	transcription cofactor activity	5.40541	0.0526411	O75925, Q01844, Q96T23, Q14192, Q7LBC6, H0YCN2, Q9H7Z6, H0YDG9	79	49	1847	2.86283	0.999978	0.434289	0.418935	1.27868
GOTERM_MF_DIRECT	GO:0019901	protein kinase binding	5.40541	0.0695757	Q9H0H5, Q13501, Q12933, O75679, Q96EY1, P09874	79	53	1847	2.64676	0.999999	0.55104	0.531559	1.15754
GOTERM_MF_DIRECT	GO:0017116	single-stranded DNA-dependent ATP-dependent DNA helicase activity	1.8018	0.0826998	Q96S55, P49736	79	2	1847	23.3797	1	0.606465	0.585024	1.0825
GOTERM_MF_DIRECT	GO:0001671	ATPase activator activity	1.8018	0.0826998	P31689, O60884	79	2	1847	23.3797	1	0.606465	0.585024	1.0825
GOTERM_MF_DIRECT	GO:0003697	single-stranded DNA binding	2.7027	0.0883612	P27694, D6RAT4, P62633, P49736	79	12	1847	5.84494	1	0.62484	0.60275	1.05374

## Sheet: Human_GO_CC
Category	Term	Column1	%	PValue	Genes	List Total	Pop Hits	Pop Total	Fold Enrichment	Bonferroni	Benjamini	FDR	Negativelog(10)
GOTERM_CC_DIRECT	GO:0005654	nucleoplasm	44.1441	1.8015e-06	A0A3B3IUA7, Q8IWS0, Q16629, P29375, Q96QC0, Q9UBF6, Q12986, Q8TDI0, Q9BRR0, Q01844, H3BT57, Q9NW08, P49736, A0A0D9SGE8, F8WEA1, Q9H0H5, A8MUK0, Q14258, P30876, Q9Y4X5, Q15428, Q7Z5L9, A0A2R8YDE6, A0A7I2V5F6, P13631, Q7LBC6, Q9H7Z6, H0YDG9, A0A7I2V5F1, Q01954, F8WEU8, Q96JP5, F2Z2R5, H0YCN2, A0A7I2V311, Q5VZF2, O75925, P27694, A0A7I2YQA8, A8MTP4, Q969J2, Q15637, F8W6K1, A0A0A0MSW0, Q8IXK0, O95376,…	77	658	1785	1.72631	0.0002918	0.000291843	0.000281034	5.74437
GOTERM_CC_DIRECT	GO:0000781	chromosome, telomeric region	7.20721	1.38463e-05	Q96S55, P27694, P30876, Q96QC0, H3BT57, Q14839, P49736, P09874	77	21	1785	8.83117	0.0022406	0.00112155	0.00108001	4.85867
GOTERM_CC_DIRECT	GO:0005840	ribosome	5.40541	2.61865e-05	P61927, P42677, Q71UM5, A6NKH3, Q15637, P61513	77	10	1785	13.9091	0.00423328	0.00141407	0.0013617	4.58192
GOTERM_CC_DIRECT	GO:0005737	cytoplasm	34.2342	0.000211681	P61927, A0A3B3IUA7, Q16629, P22681, P52594, Q9UBF6, O95376, Q9BRR0, Q01844, H7BZM7, Q7Z570, O60884, H3BT57, Q9GZT9, P62633, P49736, P09874, Q92974, P49792, F8WEA1, P31689, Q13501, Q14258, Q13642, Q9Y4X5, O75679, Q7Z5L9, C9JAB2, A0A2R8YDE6, D6RAT4, Q14839, P13631, Q9H2P0, Q01954, Q7Z2W4, F8WEU8, Q9NX58, O60870, Q96EY1, O15344, P20042, Q9UBN7, P61513, A0A0B4J1Z1, Q5VZF2	77	523	1785	1.68434	0.0337146	0.00857309	0.00825557	3.67432
GOTERM_CC_DIRECT	GO:0005829	cytosol	30.6306	0.000497014	P61927, A0A3B3IUA7, P22681, P52594, Q9UBF6, Q12986, Q9Y508, A0A0A0MSW0, Q8WU90, Q8TDI0, H7BYG8, O60884, H3BT57, Q9NW08, Q9GZT9, P62633, P09874, Q9UNY4, Q92974, Q9H0H5, P49792, P31689, Q13501, Q14258, Q13642, Q5T4S7, Q12933, Q9Y4X5, O75679, A0A2R8YDE6, D6RAT4, P42677, Q7Z2W4, F8WEU8, Q96EY1, F2Z2R5, O15344, P20042, Q9UBN7, P61513	77	461	1785	1.70972	0.0773785	0.0161032	0.0155068	3.30363
GOTERM_CC_DIRECT	GO:0005925	focal adhesion	4.5045	0.00473595	Q13642, P22681, Q14192, P61513, Q92974	77	17	1785	6.81818	0.536546	0.127871	0.123135	2.32459
GOTERM_CC_DIRECT	GO:0015030	Cajal body	3.6036	0.00717344	Q01844, H7BZM7, Q9Y4X5, P09234	77	10	1785	9.27273	0.688478	0.166014	0.159865	2.14427
GOTERM_CC_DIRECT	GO:0022625	cytosolic large ribosomal subunit	2.7027	0.0101545	P61927, A6NKH3, P61513	77	4	1785	17.3864	0.808611	0.187847	0.18089	1.99334
GOTERM_CC_DIRECT	GO:0016020	membrane	11.7117	0.0104359	P31689, P49792, O95159, Q5T4S7, P30876, Q14839, A0A0A0MSW0, Q8TDI0, P13631, Q96S55, O60884, Q96EY1, P43243, F2Z2R5, P09874	77	136	1785	2.21591	0.817226	0.187847	0.18089	1.98147
GOTERM_CC_DIRECT	GO:0005730	nucleolus	10.8108	0.018067	A8MUK0, Q8IWS0, P29375, A8MTP4, F8W6K1, Q12986, Q99590, P42677, Q01844, H7BZM7, Q01954, Q96JP5, H3BT57, Q9NX58, P09874, A0A0D9SGE8	77	129	1785	2.15645	0.947849	0.259769	0.250147	1.74311
GOTERM_CC_DIRECT	GO:0005874	microtubule	3.6036	0.0192421	Q9H0H5, A0A2R8YDE6, O15344, Q9UBN7, Q92974	77	14	1785	6.62338	0.957045	0.259769	0.250147	1.71575
GOTERM_CC_DIRECT	GO:0000792	heterochromatin	3.6036	0.0192421	H3BT57, Q8TDI0, F2Z2R5, Q8IXK0, Q13263	77	14	1785	6.62338	0.957045	0.259769	0.250147	1.71575
GOTERM_CC_DIRECT	GO:0005681	spliceosomal complex	3.6036	0.027848	Q15637, Q15428, P09234, Q9UNY4	77	16	1785	5.79545	0.989698	0.347029	0.334176	1.55521
GOTERM_CC_DIRECT	GO:0070062	extracellular exosome	5.40541	0.030385	F8WEA1, P31689, Q9H0H5, Q13501, Q16629, O60884, C9JAB2, A0A0B4J1Z1, P61513	77	42	1785	3.31169	0.993253	0.351598	0.338576	1.51734
GOTERM_CC_DIRECT	GO:0022626	cytosolic ribosome	2.7027	0.0326982	P61927, P42677, P61513	77	7	1785	9.93506	0.995418	0.353141	0.340061	1.48548
GOTERM_CC_DIRECT	GO:0016363	nuclear matrix	4.5045	0.0398986	H3BT57, O60870, Q5BKZ1, P43243, A0A0A0MRN4, Q9H7Z6	77	31	1785	3.739	0.998634	0.403973	0.389011	1.39904
GOTERM_CC_DIRECT	GO:0030426	growth cone	2.7027	0.0424106	H7BZM7, Q7Z570, P22681	77	8	1785	8.69318	0.999107	0.404148	0.389179	1.37253
GOTERM_CC_DIRECT	GO:0090734	site of DNA damage	2.7027	0.0530482	P27694, Q14839, P09874	77	9	1785	7.72727	0.999854	0.477434	0.459751	1.27533
GOTERM_CC_DIRECT	GO:0043231	intracellular membrane-bounded organelle	7.20721	0.0560267	Q13501, P49792, Q01954, P52594, O60870, Q5BKZ1, Q96EY1, A0A0A0MRN4, Q9GZT9	77	82	1785	2.26164	0.999912	0.477701	0.460009	1.25161
GOTERM_CC_DIRECT	GO:0005819	spindle	2.7027	0.0767286	Q9H0H5, O15344, Q92974	77	11	1785	6.32231	0.999998	0.621502	0.598483	1.11504
GOTERM_CC_DIRECT	GO:0071004	U2-type prespliceosome	1.8018	0.0833641	Q15428, P09234	77	2	1785	23.1818	0.999999	0.643095	0.619276	1.07902
GOTERM_CC_DIRECT	GO:0043025	neuronal cell body	2.7027	0.0896012	H7BZM7, Q7Z570, Q9H2P0	77	12	1785	5.79545	1	0.659791	0.635354	1.04769
