# Supplementary material for: Mining proteomes for zinc finger persulfidation
Source: Royal Society of Chemistry journal article supplement (doi:10.1039/d3cb00106g), 2024-01-01
Supplement: d3cb00106g12.xlsx [file d3cb00106g12.xlsx]

## Sheet: a thaliana_BP
Category	Term	Column1	%	PValue	Genes	List Total	Pop Hits	Pop Total	Fold Enrichment	Bonferroni	Benjamini	FDR	Negativelog(10)
GOTERM_BP_DIRECT	GO:0000727	double-strand break repair via break-induced replication	6.15385	0.00146592	Q0WVF5, F4KAB8, P43299, Q9LPD9	63	4	838	13.3016	0.246578	0.280017	0.280017	2.83389
GOTERM_BP_DIRECT	GO:0000398	mRNA splicing, via spliceosome	10.7692	0.00290173	O81126, Q9SJA6, Q9S709, Q9FMY5, Q8VYA5, Q84WU9, Q9FYB7	63	21	838	4.43386	0.429275	0.280017	0.280017	2.53734
GOTERM_BP_DIRECT	GO:0008380	RNA splicing	7.69231	0.00605593	Q9ZVD0, O81126, Q9SJA6, Q8VYA5, Q9FYB7	63	11	838	6.04618	0.690361	0.320289	0.320289	2.21782
GOTERM_BP_DIRECT	GO:0016070	RNA metabolic process	12.3077	0.00663812	Q8LA16, Q9M2B4, Q9T0J6, Q0WVD6, Q8H1G0, O81488, Q84WU9, Q9SK74	63	32	838	3.3254	0.723468	0.320289	0.320289	2.17796
GOTERM_BP_DIRECT	GO:0006270	DNA replication initiation	6.15385	0.0109041	Q0WVF5, F4KAB8, P43299, Q9LPD9	63	7	838	7.60091	0.879492	0.420897	0.420897	1.96241
GOTERM_BP_DIRECT	GO:0006268	DNA unwinding involved in DNA replication	6.15385	0.0235039	Q0WVF5, F4KAB8, P43299, Q9LPD9	63	9	838	5.91182	0.989851	0.756041	0.756041	1.62886
GOTERM_BP_DIRECT	GO:0048507	meristem development	4.61538	0.0665864	Q8LA16, Q9SV09, Q8H1G0	63	6	838	6.65079	0.999998	1	1	1.17661
GOTERM_BP_DIRECT	GO:0010468	regulation of gene expression	12.3077	0.0740866	Q8LA16, Q9M2B4, Q9T0J6, Q8H1G0, O81488, Q84WU9, Q8RXE7, Q947D2	63	51	838	2.08652	1	1	1	1.13026
GOTERM_BP_DIRECT	GO:0007049	cell cycle	4.61538	0.0888593	F4KAB8, P43299, Q9LPD9	63	7	838	5.70068	1	1	1	1.0513

## Sheet: a  thaliana_MF
Category	Term	Column1	%	PValue	Genes	List Total	Pop Hits	Pop Total	Fold Enrichment	Bonferroni	Benjamini	FDR	Negativelog(10)
GOTERM_MF_DIRECT	GO:0003729	mRNA binding	23.0769	9.87898e-05	Q9ZUM0, Q84W91, Q9SQU4, Q8RWN5, Q8VYA5, Q9FYB7, Q9LQM3, Q9LIN3, O81126, Q9SV09, Q9LNV5, Q9SJA6, Q9C7C3, Q9FNZ1, Q94AD9	65	64	862	3.10817	0.00551722	0.00553223	0.00513707	4.00529
GOTERM_MF_DIRECT	GO:0035064	methylated histone binding	9.23077	0.00156246	Q8LA16, Q9SUM4, F4JL28, O81488, Q9FFF5, Q9SRM4	65	13	862	6.12071	0.0838415	0.0437487	0.0406238	2.80619
GOTERM_MF_DIRECT	GO:0005515	protein binding	55.3846	0.00443248	Q9ZUM0, F4JL28, Q94B71, Q9C911, Q9LZR5, Q0WVF5, F4KAB8, Q680Q4, Q9M2N5, Q8H1G5, Q9LHF0, Q9M354, P93755, Q9LUZ4, Q9FVE6, O80996, Q9LNV5, Q84JE8, O81126, Q8H1G0, Q9M2V1, Q9S709, Q9SLB9, P43299, Q9ZQ18, Q8VYA5, Q9LIE5, Q9S752, Q9FL69, Q9LFC0, Q9SUM4, Q9ZVD0, Q9SJA6, Q9FMY5, Q84JU6, Q9LPD9	65	331	862	1.44234	0.220241	0.0827397	0.0768297	2.35335
GOTERM_MF_DIRECT	GO:0003677	DNA binding	41.5385	0.00726297	Q9ZUM0, Q8L7S3, Q0WVF5, Q84WU9, F4KAB8, Q9M2N5, Q9LHF0, P93755, Q9LUZ4, Q9LIN3, Q9LNV5, Q84JE8, Q9S709, Q9C7C3, E0X9N4, Q9FNZ1, P43299, Q84W91, Q9SQU4, Q9LQM3, Q9SUM4, Q9ZVD0, Q9SV09, Q9FMY5, Q9LPD9, Q94AD9, Q9SK74	65	228	862	1.57045	0.335161	0.101682	0.0944187	2.13889
GOTERM_MF_DIRECT	GO:0003723	RNA binding	15.3846	0.0109649	Q9LUZ4, Q9LIN3, O81126, Q9SJA6, Q9S709, Q9C7C3, Q9FMY5, Q8RWN5, Q8VYA5, Q9FYB7	65	52	862	2.5503	0.460668	0.122806	0.114035	1.96
GOTERM_MF_DIRECT	GO:0003712	transcription cofactor activity	7.69231	0.0157229	Q8LA16, Q9M2B4, O81488, Q9FFF5, Q9SRM4	65	14	862	4.73626	0.588306	0.133673	0.124125	1.80347
GOTERM_MF_DIRECT	GO:0003678	DNA helicase activity	6.15385	0.0167091	Q0WVF5, F4KAB8, P43299, Q9LPD9	65	8	862	6.63077	0.610782	0.133673	0.124125	1.77705
GOTERM_MF_DIRECT	GO:0003697	single-stranded DNA binding	6.15385	0.0419043	Q0WVF5, F4KAB8, P43299, Q9LPD9	65	11	862	4.82238	0.90903	0.269896	0.250618	1.37774
GOTERM_MF_DIRECT	GO:0003676	nucleic acid binding	9.23077	0.0433762	Q8H1G5, Q8L7S3, Q9C911, Q8RWN5, Q9M8S7, Q8VYA5	65	27	862	2.94701	0.916535	0.269896	0.250618	1.36275
GOTERM_MF_DIRECT	GO:0005096	GTPase activator activity	6.15385	0.0934521	Q9M354, Q8RXE7, Q9FL69, Q9FVJ3	65	15	862	3.53641	0.99589	0.523332	0.485951	1.02941

## Sheet: a  thaliana_CC
Category	Term	Column1	%	PValue	Genes	List Total	Pop Hits	Pop Total	Fold Enrichment	Bonferroni	Benjamini	FDR	Negativelog(10)
GOTERM_CC_DIRECT	GO:0016607	nuclear speck	15.3846	5.34509e-06	Q9LFC0, Q9ZVD0, O81126, Q9SJA6, Q9S709, Q9FMY5, Q8VYA5, Q680Q4, Q9SY88, Q9FYB7	64	21	854	6.35417	0.000197749	0.000197768	0.000187078	5.27205
GOTERM_CC_DIRECT	GO:0005681	spliceosomal complex	10.7692	0.00117048	O81126, Q9SJA6, Q9S709, Q9FMY5, Q9M8S7, Q8VYA5, Q9FYB7	64	18	854	5.18924	0.0424075	0.0179375	0.0169679	2.93164
GOTERM_CC_DIRECT	GO:0000347	THO complex	6.15385	0.00145439	Q0WVF5, F4KAB8, P43299, Q9LPD9	64	4	854	13.3438	0.0524273	0.0179375	0.0169679	2.83732
GOTERM_CC_DIRECT	GO:0005730	nucleolus	10.7692	0.00286601	Q9ZVD0, Q9FVE6, O81126, Q9LZR5, Q9SJA6, Q9S709, Q8RWN5	64	21	854	4.44792	0.10075	0.0265106	0.0250776	2.54272
GOTERM_CC_DIRECT	GO:0042555	MCM complex	6.15385	0.0065263	Q0WVF5, F4KAB8, P43299, Q9LPD9	64	6	854	8.89583	0.215151	0.0482946	0.0456841	2.18533
GOTERM_CC_DIRECT	GO:0005829	cytosol	12.3077	0.0732597	Q8H1G5, Q9M354, Q9ZQ18, Q9LIN3, Q9M2V1, Q9M8S7, Q9M2N5, Q9SK74	64	51	854	2.09314	0.940097	0.451768	0.427348	1.13513
