# Supplementary material for: Mining proteomes for zinc finger persulfidation
Source: Royal Society of Chemistry journal article supplement (doi:10.1039/d3cb00106g), 2024-01-01
Supplement: d3cb00106g13.xlsx [file d3cb00106g13.xlsx]

## Sheet: Mouse_BP
Category	Term	Column1	%	PValue	Genes	List Total	Pop Hits	Pop Total	Fold Enrichment	Bonferroni	Benjamini	FDR	Negativelog(10)
GOTERM_BP_DIRECT	GO:0000398	mRNA splicing, via spliceosome	5.24194	5.96061e-05	Q61048, Q62203, Q8BL97, Q9D554, Q62241, Q64213, Q9D883, Q8BHJ9, Q99KG3, Q91YE7, Q8C7Q4, Q3TIX9, Q8BGJ9	239	20	1234	3.35607	0.0831841	0.086846	0.086846	4.22471
GOTERM_BP_DIRECT	GO:0015031	protein transport	5.64516	0.000356039	B1AUE5, Q9ERU9, Q9D8S3, Q8BXK8, Q9DCH6, Q9JM13, Q91WB4, Q99K28, P47708, Q8BIJ7, Q8R307, Q99LI8, Q9EPJ9, Q9DBR0	239	26	1234	2.78017	0.40479	0.259374	0.259374	3.4485
GOTERM_BP_DIRECT	GO:0006397	mRNA processing	8.06452	0.000710618	Q61048, Q62203, Q8BL97, Q9D554, Q91XI1, Q6NZN0, Q9R020, O88291, Q9CYA6, P63271, Q62384, Q64213, Q9D883, P97868, Q8BHJ9, Q91YE7, Q8C7Q4, Q3TIX9, Q9Z199, Q9DBR1	239	48	1234	2.15132	0.645036	0.345124	0.345124	3.14836
GOTERM_BP_DIRECT	GO:0006511	ubiquitin-dependent protein catabolic process	12.5	0.00240411	Q61510, Q80SY4, Q8R5K2, Q91W36, Q9DBY1, P56399, Q91YL2, Q3U319, Q9ET26, A2AN08, P97868, Q9QZR0, Q8VDF2, P60670, P62878, Q6ZQM0, Q3UJD6, Q9CR50, O08759, O70481, Q8CH72, Q5U430, Q9R049, Q9Z1K5, Q6WKZ8, Q9Z1K6, Q99LG0, Q9WTZ1, Q9Z2V5, P22682, E9Q555	239	96	1234	1.66728	0.970013	0.794353	0.794353	2.61905
GOTERM_BP_DIRECT	GO:0008380	RNA splicing	6.45161	0.00272599	Q61048, Q62203, Q8BL97, Q9D554, Q9R020, O88291, Q9CYA6, P56959, Q62384, Q64213, Q9D883, Q8BHJ9, Q99KG3, Q91YE7, Q8C7Q4, Q3TIX9	239	38	1234	2.17397	0.981262	0.794353	0.794353	2.56448
GOTERM_BP_DIRECT	GO:0006468	protein phosphorylation	6.04839	0.010105	Q64337, Q62318, Q7TT50, P04627, Q62074, Q61097, Q02111, Q9WTJ4, P70336, P70335, Q62101, Q9JM13, Q8K1Y2, P22682, P20444	239	39	1234	1.98584	1	1	1	1.99546
GOTERM_BP_DIRECT	GO:0042659	regulation of cell fate specification	2.01613	0.0146344	Q924K8, Q8VHR5, Q6PDQ2, Q8K4B0, Q9R190	239	6	1234	4.30265	1	1	1	1.83463
GOTERM_BP_DIRECT	GO:0032786	positive regulation of DNA-templated transcription, elongation	1.6129	0.0243388	P11103, Q9Z199, P63271, Q5SVQ0	239	4	1234	5.16318	1	1	1	1.6137
GOTERM_BP_DIRECT	GO:0006897	endocytosis	2.41935	0.0277621	Q80SY4, Q8R5K2, Q9JM13, Q8BIJ7, Q8BL66, Q810B6	239	10	1234	3.09791	1	1	1	1.55655
GOTERM_BP_DIRECT	GO:0016192	vesicle-mediated transport	2.41935	0.0277621	Q9JM13, Q99K28, Q9D8S3, Q8R307, Q9DB43, Q9EPJ9	239	10	1234	3.09791	1	1	1	1.55655
GOTERM_BP_DIRECT	GO:2000736	regulation of stem cell differentiation	2.41935	0.0277621	Q924K8, Q8VHR5, Q3TYX3, Q6PDQ2, Q8K4B0, Q9R190	239	10	1234	3.09791	1	1	1	1.55655
GOTERM_BP_DIRECT	GO:0030036	actin cytoskeleton organization	2.41935	0.0277621	Q3UHD9, Q7TT50, Q9R059, P70336, P70335, P11531	239	10	1234	3.09791	1	1	1	1.55655
GOTERM_BP_DIRECT	GO:0006919	activation of cysteine-type endopeptidase activity involved in apoptotic process	2.01613	0.0290224	Q60953, P46718, Q6ZWY3, Q9WTZ1, Q99M87	239	7	1234	3.68799	1	1	1	1.53727
GOTERM_BP_DIRECT	GO:0048511	rhythmic process	4.43548	0.029539	Q60953, P55200, P41230, Q7TPH6, Q8BGJ9, O08759, O89090, P59997, P49698, P70336, Q8K4B0	239	28	1234	2.02839	1	1	1	1.5296
GOTERM_BP_DIRECT	GO:0070936	protein K48-linked ubiquitination	5.24194	0.0308876	Q61510, Q6ZQM0, Q9DBY1, Q91YL2, Q8BFX1, O08759, Q80TP3, Q8CH72, Q9R049, Q9Z1K6, Q7TPH6, P62878, Q71FD5	239	36	1234	1.86448	1	1	1	1.51022
GOTERM_BP_DIRECT	GO:0016575	histone deacetylation	2.41935	0.043062	Q924K8, Q8VHR5, Q9Z2V5, Q6PDQ2, Q8K4B0, Q9R190	239	11	1234	2.81628	1	1	1	1.36591
GOTERM_BP_DIRECT	GO:0071560	cellular response to transforming growth factor beta stimulus	2.01613	0.0493996	P23949, Q64318, P55200, P11103, P13864	239	8	1234	3.22699	1	1	1	1.30628
GOTERM_BP_DIRECT	GO:0006261	DNA-dependent DNA replication	1.6129	0.0522269	P52431, Q9CWY9, Q91XU0, Q9WVF7	239	5	1234	4.13054	1	1	1	1.28211
GOTERM_BP_DIRECT	GO:0006368	transcription elongation from RNA polymerase II promoter	1.6129	0.0522269	P10711, Q9QVN7, Q9Z199, P63271	239	5	1234	4.13054	1	1	1	1.28211
GOTERM_BP_DIRECT	GO:0010613	positive regulation of cardiac muscle hypertrophy	1.6129	0.0522269	P11103, P70336, P20444, P70335	239	5	1234	4.13054	1	1	1	1.28211
GOTERM_BP_DIRECT	GO:0000731	DNA synthesis involved in DNA repair	1.6129	0.0522269	P52431, P33609, Q91XU0, Q9WVF7	239	5	1234	4.13054	1	1	1	1.28211
GOTERM_BP_DIRECT	GO:0006325	chromatin organization	11.2903	0.0766898	Q91W36, A2A8L1, P55200, Q9Z277, Q3U319, Q8R5A0, P13864, P63271, O08550, Q8VDF2, P41230, Q6PDK2, Q9CQJ4, Q61103, Q80U70, Q61687, Q6ZPY7, Q9WTU0, Q62318, P59997, Q61164, Q6PDQ2, Q5SVQ0, Q99LG0, O35730, Q9Z2V5, Q9Z199, Q91X20	239	108	1234	1.3386	1	1	1	1.11526
GOTERM_BP_DIRECT	GO:0071897	DNA biosynthetic process	1.6129	0.0898195	P97386, P52431, P33609, Q9WVF7	239	6	1234	3.44212	1	1	1	1.04663
GOTERM_BP_DIRECT	GO:0071364	cellular response to epidermal growth factor stimulus	1.6129	0.0898195	P23949, P22893, Q62384, Q68FF6	239	6	1234	3.44212	1	1	1	1.04663
GOTERM_BP_DIRECT	GO:0006260	DNA replication	3.22581	0.0910773	P97386, P52431, P97310, P33609, Q91XU0, Q5SVQ0, Q9WVF7, P97868	239	21	1234	1.96693	1	1	1	1.04059
GOTERM_BP_DIRECT	GO:0016310	phosphorylation	4.83871	0.096471	Q9Z1T6, Q9Z277, Q7TT50, Q8K1Y2, P04627, Q62074, Q61097, Q02111, P70336, P20444, P70335, Q62101	239	38	1234	1.63048	1	1	1	1.0156
GOTERM_BP_DIRECT	GO:0071596	ubiquitin-dependent protein catabolic process via the N-end rule pathway	1.20968	0.0970133	O70481, Q5U430, Q6WKZ8	239	3	1234	5.16318	1	1	1	1.01317
GOTERM_BP_DIRECT	GO:0032012	regulation of ARF protein signal transduction	1.20968	0.0970133	Q9JLQ2, Q9EPJ9, Q68FF6	239	3	1234	5.16318	1	1	1	1.01317
GOTERM_BP_DIRECT	GO:0035278	miRNA mediated inhibition of translation	1.20968	0.0970133	Q8C7Q4, Q1PSW8, P22893	239	3	1234	5.16318	1	1	1	1.01317
GOTERM_BP_DIRECT	GO:0002181	cytoplasmic translation	1.20968	0.0970133	Q3TIV5, P62983, P61514	239	3	1234	5.16318	1	1	1	1.01317
GOTERM_BP_DIRECT	GO:0046716	muscle cell cellular homeostasis	1.20968	0.0970133	Q8CH72, P20444, P11531	239	3	1234	5.16318	1	1	1	1.01317
GOTERM_BP_DIRECT	GO:0070213	protein auto-ADP-ribosylation	1.20968	0.0970133	Q8BZ20, Q8C1B2, P11103	239	3	1234	5.16318	1	1	1	1.01317
GOTERM_BP_DIRECT	GO:0008631	intrinsic apoptotic signaling pathway in response to oxidative stress	1.20968	0.0970133	Q60953, Q9WTZ1, Q91VY9	239	3	1234	5.16318	1	1	1	1.01317
GOTERM_BP_DIRECT	GO:0030174	regulation of DNA-dependent DNA replication initiation	1.20968	0.0970133	P97310, Q91XU0, Q5SVQ0	239	3	1234	5.16318	1	1	1	1.01317

## Sheet: Mouse_CC
Category	Term	Column1	%	PValue	Genes	List Total	Pop Hits	Pop Total	Fold Enrichment	Bonferroni	Benjamini	FDR	Negativelog(10)
GOTERM_CC_DIRECT	GO:0005737	cytoplasm	56.8548	2.71123e-05	Q922J3, Q8BL97, Q9QXA7, Q9CWY9, P13864, P97868, Q08288, Q8BHJ9, P23949, O88737, Q1PSW8, Q7TPH6, P62878, Q99PP9, Q9DAZ9, Q61687, Q9D115, Q60875, Q6ZQM0, Q9CR50, O70481, E9QAM5, Q6PDQ2, Q9Z1K5, Q6WKZ8, Q9WVM1, Q9Z1K6, Q99LG0, Q8R2V5, Q8K1Y2, Q9QXK2, Q9WTZ1, Q9Z2V5, Q71FD5, P20444, E9Q555, Q91X58, Q922H1, Q8R5K2, Q91W36, Q7TT50, Q9ET26, Q3UKC1, P97447, O89090, Q61097, Q9WTJ4, A2AN08, Q62101, Q99M87,…	239	589	1257	1.25904	0.00963253	0.00967909	0.00962487	4.56683
GOTERM_CC_DIRECT	GO:0043025	neuronal cell body	5.24194	0.000816628	Q8R5K2, Q60875, Q9Z103, P13864, Q9R049, P56959, Q62384, Q8K3K8, Q9QYX7, P11531, O88737, Q9Z2V5, P20444	239	25	1257	2.7349	0.252974	0.128285	0.127566	3.08798
GOTERM_CC_DIRECT	GO:0005829	cytosol	35.0806	0.00107802	Q61510, Q80UY2, P52431, A2A8L1, P56399, Q3U319, Q5F293, Q8R5A0, P70347, Q9QZR0, Q68FF6, P70700, Q3UHH1, Q8BHJ9, O88737, Q6A009, Q7TPH6, P22893, P62878, P49698, Q99PP9, Q9D0D5, Q64318, Q3UPF5, Q6ZQM0, Q60953, Q6ZWY3, Q9CR50, O08759, O70481, Q9R049, E9QAM5, P70336, Q8C7Q4, Q8BP48, Q8K1Y2, P47708, Q9WTZ1, Q9Z2V5, P20444, P61514, E9Q555, E9Q4P1, Q922H1, Q9Z1T6, P55200, Q91YL2, Q9D8S3, Q8BXK8, Q9ET26,…	239	349	1257	1.31109	0.319591	0.128285	0.127566	2.96737
GOTERM_CC_DIRECT	GO:0031410	cytoplasmic vesicle	7.66129	0.00165582	Q64337, Q80SY4, Q922J3, Q60875, Q6ZQM0, Q9Z1T6, Q9R0Q1, Q3UKC1, Q8K3K8, Q8VCM3, Q9WVM1, O88737, Q8VDF2, Q8VDC1, P47708, Q8BVW3, Q8R307, Q8BL66, Q810B6	239	48	1257	2.08185	0.446568	0.147782	0.146954	2.78099
GOTERM_CC_DIRECT	GO:0005681	spliceosomal complex	4.43548	0.0024493	Q61048, Q8BHJ9, Q62203, Q91YE7, Q9D554, Q3TIX9, Q8BGJ9, Q9CYA6, Q62241, Q9D883, Q64213	239	21	1257	2.75493	0.583335	0.17488	0.1739	2.61096
GOTERM_CC_DIRECT	GO:0005768	endosome	8.06452	0.00470022	Q64337, Q60953, Q6ZQM0, Q3UHD9, Q9Z1T6, Q9R0Q1, Q62074, Q8K3K8, Q68FF6, Q8VCM3, Q9JM13, Q91WB4, Q8VDC1, Q8BIJ7, Q71FD5, Q8R307, Q99LI8, Q8BL66, Q810B6, E9Q4P1	239	56	1257	1.87836	0.813986	0.279663	0.278097	2.32788
GOTERM_CC_DIRECT	GO:0005813	centrosome	5.24194	0.00999209	Q61103, Q80SY4, Q8R5K2, Q922J3, P70336, Q6PDQ2, A2AN08, P97868, Q68FF6, Q9QXK2, Q9QVN7, Q9Z2V5, Q9DAZ9	239	32	1257	2.13664	0.972267	0.48674	0.484013	2.00034
GOTERM_CC_DIRECT	GO:0030425	dendrite	4.43548	0.0111105	O88737, Q9JM13, Q3UHD9, O70585, Q9Z103, Q9Z2V5, Q9R049, P56959, P20444, Q9QYX7, Q68FF6	239	25	1257	2.31414	0.981475	0.48674	0.484013	1.95427
GOTERM_CC_DIRECT	GO:0030424	axon	4.03226	0.0134638	O88737, Q7TPH6, Q9Z103, Q9Z2V5, P22682, Q62384, Q8K3K8, P20444, Q9QYX7, P11531	239	22	1257	2.39064	0.992087	0.48674	0.484013	1.87083
GOTERM_CC_DIRECT	GO:0000151	ubiquitin ligase complex	5.64516	0.0136342	Q9DBY1, Q3U319, Q9CR50, O70481, Q5U430, Q9R049, Q9Z1K5, Q6WKZ8, Q9Z1K6, Q9WUB0, Q99MP8, O35730, P62878, Q9CQJ4	239	37	1257	1.99005	0.99256	0.48674	0.484013	1.86537
GOTERM_CC_DIRECT	GO:0016581	NuRD complex	2.41935	0.0151768	Q924K8, A2A8L1, Q8VHR5, Q6PDQ2, Q8K4B0, Q9R190	239	9	1257	3.50628	0.995745	0.492557	0.489798	1.81882
GOTERM_CC_DIRECT	GO:0071013	catalytic step 2 spliceosome	2.01613	0.0272164	Q8BHJ9, Q62203, Q9D554, Q9CYA6, Q9D883	239	7	1257	3.75672	0.999947	0.72244	0.718393	1.56517
GOTERM_CC_DIRECT	GO:0005840	ribosome	2.01613	0.0272164	Q6ZWY3, P62983, Q6ZWU9, P61514, P11531	239	7	1257	3.75672	0.999947	0.72244	0.718393	1.56517
GOTERM_CC_DIRECT	GO:0032991	macromolecular complex	7.66129	0.0375079	Q60875, Q0P678, Q62318, Q3U319, Q925H1, P11103, Q61097, Q80TP3, P13864, Q9R049, P70347, Q6PDQ2, P97868, P11531, Q99KG3, P47708, Q71FD5, Q9Z2V5, P20444	239	63	1257	1.58617	0.999999	0.72244	0.718393	1.42588
GOTERM_CC_DIRECT	GO:0005794	Golgi apparatus	7.66129	0.0375079	Q8R5K2, Q60875, Q61624, Q9D8S3, Q9R049, Q8K3K8, P70335, Q62101, Q8K4B0, P11531, Q810J8, Q8VDC1, Q99K28, P22682, Q9EPJ9, Q91VY9, Q9DB43, Q9DBR0, E9Q4P1	239	63	1257	1.58617	0.999999	0.72244	0.718393	1.42588
GOTERM_CC_DIRECT	GO:0005654	nucleoplasm	44.7581	0.0376617	Q8BL97, P52431, P62915, Q3U319, Q9CWY9, Q925H1, P13864, Q62241, Q9D883, Q08288, P70700, Q8BHJ9, Q8VDF2, Q9QWH1, Q7TPH6, Q9QVN7, P62878, Q61687, Q80U70, Q64318, O88291, Q9CR50, P59997, E9QAM5, Q61164, Q6PDQ2, Q9Z1K5, Q9WVM1, Q9Z1K6, Q8K1Y2, Q3TIX9, Q9QXK2, Q9WTZ1, Q7TQ95, Q9Z2V5, Q71FD5, Q8R5K2, Q91W36, P55200, O89090, Q922H9, A2AN08, Q99MP8, Q8BMJ7, Q00899, P41230, Q8CFI7, Q9CQJ4, Q9WVF7, Q9DBR1,…	239	514	1257	1.13579	0.999999	0.72244	0.718393	1.4241
GOTERM_CC_DIRECT	GO:0098793	presynapse	3.22581	0.0381903	O88737, P47708, Q9D8S3, Q8R307, P62983, Q6ZWU9, P61514, Q68FF6	239	18	1257	2.33752	0.999999	0.72244	0.718393	1.41805
GOTERM_CC_DIRECT	GO:0005730	nucleolus	11.6935	0.0429724	P10711, Q9Z277, Q9JMD0, P11103, Q922H9, Q62384, P97868, Q08288, P70700, Q9JM13, Q8BW10, Q9DBR1, P60898, Q9DBR0, Q80U70, Q62511, Q61545, Q60953, Q9WTU0, P33609, Q61164, Q99KG3, Q8C7Q4, B1AY10, Q8BJ05, Q91VY9, Q9DB42, E9Q555, E9Q4P1	239	109	1257	1.39929	1	0.72244	0.718393	1.36681
GOTERM_CC_DIRECT	GO:0016020	membrane	20.1613	0.0442816	Q3KNM2, Q80SY4, B1AUE5, Q922J3, Q9DBY1, Q9ERU9, Q8R307, Q6ZQM0, Q60953, Q9R0Q1, Q9R049, P70336, P70335, P11531, Q9WVM1, Q8R2V5, Q8K1Y2, P47708, Q7TQ95, Q71FD5, P20444, Q91X58, Q9Z1T6, Q7TT50, Q9D8S3, Q61097, A2AN08, Q62101, Q99M87, Q8BIJ7, Q9QYJ0, Q91VZ6, Q61545, O70585, Q3UJD6, Q62074, Q5U430, Q02111, Q810J8, Q8R151, P63037, Q91WB4, Q99K28, B9EJ80, Q8BVW3, P22682, Q99LI8, Q8BL66, Q810B6, Q9DB43	239	209	1257	1.25823	1	0.72244	0.718393	1.35378
GOTERM_CC_DIRECT	GO:0015030	Cajal body	2.01613	0.0464704	Q9JJ48, Q61545, Q62241, Q62384, Q9Z1K5	239	8	1257	3.28713	1	0.72244	0.718393	1.33282
GOTERM_CC_DIRECT	GO:0030141	secretory granule	1.6129	0.0497096	P47708, Q9R0Q1, Q99LI8, P11531	239	5	1257	4.20753	1	0.72244	0.718393	1.30356
GOTERM_CC_DIRECT	GO:0090543	Flemming body	1.6129	0.0497096	Q91W36, Q3UHD9, Q9WVM1, Q9DAZ9	239	5	1257	4.20753	1	0.72244	0.718393	1.30356
GOTERM_CC_DIRECT	GO:0005856	cytoskeleton	8.46774	0.0507602	Q80SY4, Q8R5K2, Q922J3, Q60875, Q7TT50, Q9JMD0, P70336, Q6PDQ2, A2AN08, P97868, P70335, Q8K4B0, P11531, Q68FF6, Q9WVM1, O88737, Q7TPH6, Q9QXK2, Q8C9B9, Q9Z2V5, Q9DAZ9	239	74	1257	1.49254	1	0.72244	0.718393	1.29448
GOTERM_CC_DIRECT	GO:0043231	intracellular membrane-bounded organelle	8.46774	0.0507602	Q61103, Q64337, Q924K8, Q9Z1T6, Q9ERU9, O88291, Q9CR50, Q61097, Q99M87, Q8K4B0, Q8BHJ9, P63037, Q8BMJ7, Q8R2V5, Q8VDC1, Q7TPH6, Q8BIJ7, Q71FD5, Q99LI8, Q810B6, E9Q4P1	239	74	1257	1.49254	1	0.72244	0.718393	1.29448
GOTERM_CC_DIRECT	GO:0014069	postsynaptic density	3.62903	0.0526147	Q80SY4, O88737, Q60875, O70585, Q6ZWU9, Q9EPJ9, Q9QYX7, P11531, Q68FF6	239	23	1257	2.05803	1	0.72244	0.718393	1.27889
GOTERM_CC_DIRECT	GO:1990904	ribonucleoprotein complex	3.62903	0.0526147	P23949, Q80U70, Q0P678, Q6ZWY3, Q8BJ05, P22893, Q62241, P62983, P61514	239	23	1257	2.05803	1	0.72244	0.718393	1.27889
GOTERM_CC_DIRECT	GO:0005776	autophagosome	2.41935	0.0583387	Q810J8, Q64337, Q3URU2, Q8VDC1, Q8K3K8, Q8R307	239	12	1257	2.62971	1	0.743818	0.739651	1.23404
GOTERM_CC_DIRECT	GO:0010494	cytoplasmic stress granule	2.41935	0.0583387	Q61510, Q8R151, Q8C7Q4, Q8BFR6, P22893, P70335	239	12	1257	2.62971	1	0.743818	0.739651	1.23404
GOTERM_CC_DIRECT	GO:0005783	endoplasmic reticulum	7.25806	0.061113	Q3KNM2, Q64337, Q91X58, Q60953, Q9DBY1, Q3UJD6, Q61097, Q9R049, Q8K4B0, P53996, Q810J8, P63037, Q8BMJ7, Q91WB4, P60670, B9EJ80, Q7TQ95, P20444	239	62	1257	1.52693	1	0.752323	0.748108	1.21387
GOTERM_CC_DIRECT	GO:0016607	nuclear speck	7.66129	0.065534	Q61048, Q62203, Q8BL97, Q9D554, A2A8L1, Q0P678, Q9JIB4, Q9CR50, Q8VHR5, Q9D883, P97868, Q8BHJ9, Q99KG3, Q8C7Q4, O35730, Q8BGJ9, Q8BIJ7, Q8BJ05, Q9JIY2	239	67	1257	1.49148	1	0.757546	0.753302	1.18353
GOTERM_CC_DIRECT	GO:0000781	chromosome, telomeric region	3.22581	0.0662514	Q61687, P52431, Q60953, Q8CFI7, Q8VHR5, Q91XU0, Q6PDQ2, Q9R190	239	20	1257	2.10377	1	0.757546	0.753302	1.1788
GOTERM_CC_DIRECT	GO:0042995	cell projection	6.45161	0.0689613	Q922J3, Q7TT50, O70585, Q61097, Q62384, P70335, Q08288, Q9QYX7, P11531, Q68FF6, O88737, P47708, Q7TPH6, Q71FD5, Q9Z2V5, P22682	239	54	1257	1.55834	1	0.757546	0.753302	1.16139
GOTERM_CC_DIRECT	GO:0030426	growth cone	2.01613	0.0715052	Q9R049, P22682, Q62384, Q9QYX7, Q68FF6	239	9	1257	2.9219	1	0.757546	0.753302	1.14566
GOTERM_CC_DIRECT	GO:0098978	glutamatergic synapse	4.43548	0.0767982	O88737, Q60875, Q3UHD9, Q62074, O08759, Q8R307, P70336, Q8BL66, Q6ZWU9, Q9QYX7, Q68FF6	239	33	1257	1.75314	1	0.757546	0.753302	1.11465
GOTERM_CC_DIRECT	GO:0048471	perinuclear region of cytoplasm	6.45161	0.0792336	Q8R5K2, Q9Z1T6, Q80TP3, Q9R049, P56959, Q62384, Q8K3K8, Q9QYX7, P11531, Q810J8, Q8C7Q4, P63037, Q91XU0, Q9Z2V5, P22682, P20444	239	55	1257	1.53001	1	0.757546	0.753302	1.10109
GOTERM_CC_DIRECT	GO:0005739	mitochondrion	6.45161	0.0792336	Q3KNM2, Q64337, P97386, Q9ERU9, P04627, Q3UKC1, P11103, Q99M87, Q68FF6, Q810J8, Q8R151, P63037, B9EJ80, Q8BVW3, P20444, Q9DBR0	239	55	1257	1.53001	1	0.757546	0.753302	1.10109
GOTERM_CC_DIRECT	GO:0045202	synapse	6.45161	0.0792336	Q80UY2, O70585, Q9D8S3, Q99L45, Q99M87, Q9QYX7, P11531, Q68FF6, O88737, Q9JLQ2, P47708, Q71FD5, P62983, Q6ZWU9, Q9EPJ9, P61514	239	55	1257	1.53001	1	0.757546	0.753302	1.10109
GOTERM_CC_DIRECT	GO:0000791	euchromatin	2.41935	0.0806352	Q9JJ48, Q8VDF2, Q62318, O89090, Q9CQJ4, Q91X20	239	13	1257	2.42742	1	0.757546	0.753302	1.09348
GOTERM_CC_DIRECT	GO:0005669	transcription factor TFIID complex	1.6129	0.0857392	P10711, P62915, Q9JIB4, Q9D0D5	239	6	1257	3.50628	1	0.765222	0.760935	1.06682
GOTERM_CC_DIRECT	GO:0060077	inhibitory synapse	1.6129	0.0857392	O88737, O70585, Q9QYX7, Q68FF6	239	6	1257	3.50628	1	0.765222	0.760935	1.06682
GOTERM_CC_DIRECT	GO:0031466	Cul5-RING ubiquitin ligase complex	1.20968	0.0937451	Q9WTZ1, P62878, Q9Z1K6	239	3	1257	5.25941	1	0.778302	0.773942	1.02805
GOTERM_CC_DIRECT	GO:0031463	Cul3-RING ubiquitin ligase complex	1.20968	0.0937451	Q3UHH1, P62878, Q9Z1K5	239	3	1257	5.25941	1	0.778302	0.773942	1.02805
GOTERM_CC_DIRECT	GO:0022627	cytosolic small ribosomal subunit	1.20968	0.0937451	Q6ZWY3, P62983, Q6ZWU9	239	3	1257	5.25941	1	0.778302	0.773942	1.02805

## Sheet: Mouse_MF
Category	Term	Column1	%	PValue	Genes	List Total	Pop Hits	Pop Total	Fold Enrichment	Bonferroni	Benjamini	FDR	Negativelog(10)
GOTERM_MF_DIRECT	GO:0005515	protein binding	51.2097	9.10279e-05	Q922J3, Q8BL97, P62915, Q3U319, Q925H1, P13864, Q9D883, Q3TYX3, P70700, Q9WUB0, O88737, Q1PSW8, Q8VDF2, Q9QWH1, Q7TPH6, P62878, Q8R307, Q61048, Q61687, Q80U70, Q64318, Q60875, Q9R0Q1, O70481, Q61164, Q6PDQ2, Q6WKZ8, Q9Z1K6, Q99LG0, Q9QXK2, Q9WTZ1, Q9Z2V5, P20444, Q91X58, Q922H1, Q8R5K2, Q9Z1T6, P55200, Q7TT50, Q3UKC1, P97447, O89090, Q61097, Q9WTJ4, A2AN08, Q62101, Q99M87, Q99MP8, Q00899, Q8BIJ7,…	245	529	1298	1.27191	0.0323285	0.0328611	0.032679	4.04083
GOTERM_MF_DIRECT	GO:0003723	RNA binding	13.7097	0.000363769	Q8BL97, Q9ERU9, Q62241, P13864, P56959, Q9D883, Q91YE7, P23949, Q1PSW8, Q00899, Q8BGJ9, Q6ZWU9, A2RSY6, Q9DBR1, Q8K310, Q61048, Q3TX08, Q80U70, Q61545, Q9D554, Q3UPF5, Q6NZN0, Q9R020, Q6ZWY3, Q9CYA6, Q80TP3, Q8CH72, E9QAM5, Q64213, Q99KG3, Q8R151, Q8C7Q4, Q9JJ48, Q8BJ05	245	101	1298	1.78347	0.123084	0.0656604	0.0652966	3.43917
GOTERM_MF_DIRECT	GO:0000166	nucleotide binding	10.8871	0.00114959	P52431, P97386, Q9Z1T6, A2A8L1, Q9Z277, Q7TT50, Q8BXK8, Q61097, Q62101, Q8VHH5, Q9WVF7, Q61687, P97310, Q3UHD9, P33609, P04627, Q62074, Q02111, Q9R049, E9QAM5, Q6PDQ2, P70336, P70335, Q8K1Y2, Q91XU0, P20444, E9Q555	245	78	1298	1.83391	0.339819	0.138334	0.137568	2.93946
GOTERM_MF_DIRECT	GO:0031267	small GTPase binding	5.64516	0.00308632	Q8R5K2, Q60875, Q9ERU9, Q7TT50, Q9R0Q1, Q8K3K8, P70336, P70335, Q68FF6, Q9JM13, Q9JLQ2, P47708, Q7TPH6, Q810B6	245	32	1298	2.31786	0.672375	0.27854	0.276997	2.51056
GOTERM_MF_DIRECT	GO:0005524	ATP binding	9.67742	0.0041834	Q61687, P97386, P97310, A2A8L1, Q3UHD9, Q9Z1T6, Q9Z277, Q7TT50, P04627, Q62074, Q61097, Q02111, E9QAM5, P70336, Q6PDQ2, P70335, Q62101, Q99M87, P63037, Q8K1Y2, Q9QYJ0, Q91XU0, P20444, E9Q555	245	72	1298	1.76599	0.779834	0.302041	0.300368	2.37847
GOTERM_MF_DIRECT	GO:0043130	ubiquitin binding	5.24194	0.0070625	Q64337, Q91X58, P56399, Q3UKC1, Q80TP3, Q8CH72, Q9R049, Q8K3K8, Q9WUB0, Q99LG0, P60670, Q9Z2V5, Q99LI8	245	31	1298	2.22172	0.922587	0.345056	0.343144	2.15104
GOTERM_MF_DIRECT	GO:0016740	transferase activity	31.8548	0.00708749	Q61510, Q3KNM2, Q80SY4, Q80UY2, B1AUE5, P52431, Q9DBY1, P62915, Q9ERU9, Q9Z277, Q3U319, Q8R5A0, P13864, P97868, Q3TYX3, Q9QZR0, P70700, Q9WUB0, Q6A009, Q1PSW8, O08550, Q8VDF2, Q7TPH6, Q6PDK2, P62878, Q99PP9, Q3TX08, Q9ESN6, Q6ZQM0, Q9CR50, O08759, O70481, Q9R049, P70336, Q9Z1K5, P70335, Q6WKZ8, Q9Z1K6, Q8K1Y2, Q9QXK2, Q71FD5, P20444, E9Q555, Q9CY62, Q922H1, Q9Z1T6, P55200, Q91YL2, Q7TT50, Q9ET26,…	245	331	1298	1.26447	0.923288	0.345056	0.343144	2.14951
GOTERM_MF_DIRECT	GO:0004712	protein serine/threonine/tyrosine kinase activity	4.83871	0.00865513	Q9Z1T6, Q9Z277, Q7TT50, Q8K1Y2, P04627, Q62074, Q61097, Q02111, P70336, P20444, P70335, Q62101	245	28	1298	2.27055	0.956635	0.345056	0.343144	2.06273
GOTERM_MF_DIRECT	GO:0005096	GTPase activator activity	5.24194	0.0094482	Q3UHD9, Q9ERU9, Q9D8S3, Q8BXK8, Q60790, Q68FF6, Q9WVM1, Q8VHH5, Q8R2V5, Q9JLQ2, Q99K28, Q91VZ6, Q9EPJ9	245	32	1298	2.1523	0.967516	0.345056	0.343144	2.02465
GOTERM_MF_DIRECT	GO:0008270	zinc ion binding	37.9032	0.00978089	Q3KNM2, Q62203, Q80SY4, Q80UY2, Q922J3, Q8BL97, Q8BFR6, P97386, P10711, Q9QXA7, P62915, P56399, Q925H1, Q62241, P13864, P97868, Q3UHH1, Q8BHJ9, Q6A009, Q1PSW8, O08550, Q8VDF2, Q7TPH6, Q9QWH1, Q9QVN7, P62878, P49698, Q2MHN3, Q99PP9, Q8K310, P60898, Q61048, Q9ESN6, Q9D554, Q60953, Q9WTU0, O88291, Q9R0Q1, Q9CR50, Q8VHR5, O70481, P59997, Q9Z1K5, Q6WKZ8, P11531, Q99LG0, Q8C7Q4, Q3TIX9, P47708, Q9WTZ1,…	245	410	1298	1.21465	0.971226	0.345056	0.343144	2.00962
GOTERM_MF_DIRECT	GO:0004674	protein serine/threonine kinase activity	4.43548	0.0105746	Q9Z1T6, Q7TT50, Q8K1Y2, P04627, Q62074, Q61097, Q02111, P70336, P20444, P70335, Q62101	245	25	1298	2.3311	0.978458	0.345056	0.343144	1.97574
GOTERM_MF_DIRECT	GO:0003676	nucleic acid binding	12.0968	0.0119372	Q62203, Q8BL97, P52431, P10711, Q62241, Q9D883, P97868, Q91YE7, Q99MP8, Q8VDF2, Q9QVN7, Q9WVF7, Q2MHN3, Q9DBR1, Q8K310, P60898, Q61048, Q61545, Q9D554, P33609, Q6NZN0, Q9CYA6, Q64213, P53996, Q99KG3, Q8C7Q4, B1AY10, Q91VY9, Q9DB42, A2A6A1	245	104	1298	1.52826	0.986902	0.345056	0.343144	1.9231
GOTERM_MF_DIRECT	GO:0016779	nucleotidyltransferase activity	3.22581	0.0124258	Q8BZ20, P52431, Q8CFI7, P33609, Q8C1B2, P11103, Q9WVF7, P70700	245	15	1298	2.82558	0.989044	0.345056	0.343144	1.90567
GOTERM_MF_DIRECT	GO:0003950	NAD+ ADP-ribosyltransferase activity	1.6129	0.0226342	Q8BZ20, Q3UPF5, Q8C1B2, P11103	245	4	1298	5.29796	0.999743	0.52975	0.526815	1.64524
GOTERM_MF_DIRECT	GO:1990404	protein ADP-ribosylase activity	1.6129	0.0226342	Q8BZ20, Q3UPF5, Q8C1B2, P11103	245	4	1298	5.29796	0.999743	0.52975	0.526815	1.64524
GOTERM_MF_DIRECT	GO:0044877	macromolecular complex binding	6.85484	0.0234792	Q64337, Q924K8, Q3UHD9, Q9ERU9, Q7TT50, Q3U319, Q9CWY9, Q99M87, P11531, Q68FF6, Q9JLQ2, P60670, P47708, Q9QXK2, P22893, P62878, P49698	245	52	1298	1.73203	0.999812	0.52975	0.526815	1.62932
GOTERM_MF_DIRECT	GO:0000993	RNA polymerase II core binding	2.01613	0.0265507	P62915, O88291, Q9Z199, Q8R5A0, P63271	245	7	1298	3.78426	0.99994	0.563813	0.560689	1.57592
GOTERM_MF_DIRECT	GO:0003729	mRNA binding	4.03226	0.0402701	P23949, Q91YE7, Q8C7Q4, Q8BL97, P22893, Q6NZF1, Q99L45, Q62241, Q64213, P53996	245	26	1298	2.03768	1	0.80764	0.803165	1.39502
GOTERM_MF_DIRECT	GO:0016301	kinase activity	5.64516	0.0452828	Q9Z1T6, Q9Z277, Q7TT50, P04627, Q62074, Q61097, Q02111, P70336, P70335, Q62101, Q9JLQ2, Q8K1Y2, P20444, Q9DBR0	245	43	1298	1.72492	1	0.821483	0.816932	1.34407
GOTERM_MF_DIRECT	GO:0003678	DNA helicase activity	1.6129	0.0487683	Q61687, P97310, A2A8L1, Q6PDQ2	245	5	1298	4.23837	1	0.821483	0.816932	1.31186
GOTERM_MF_DIRECT	GO:0051082	unfolded protein binding	1.6129	0.0487683	P63037, Q9DBY1, Q9QYJ0, Q99M87	245	5	1298	4.23837	1	0.821483	0.816932	1.31186
GOTERM_MF_DIRECT	GO:0004672	protein kinase activity	4.43548	0.0500627	Q62318, Q7TT50, Q8K1Y2, P04627, Q62074, Q61097, Q02111, P70336, P20444, P70335, Q62101	245	31	1298	1.87992	1	0.821483	0.816932	1.30049
GOTERM_MF_DIRECT	GO:0031593	polyubiquitin binding	2.41935	0.0567983	Q91X58, Q8VHH5, Q9QXK2, Q9Z2V5, Q8K3K8, Q9DCH6	245	12	1298	2.64898	1	0.891486	0.886547	1.24566
GOTERM_MF_DIRECT	GO:0031625	ubiquitin protein ligase binding	6.04839	0.0599335	Q64337, Q60953, Q6ZQM0, Q62318, Q3U319, Q3UJD6, P11103, P70347, Q9Z1K5, P63037, P60670, Q9QXK2, P62878, Q9Z2V5, P62983	245	49	1298	1.62182	1	0.901499	0.896505	1.22233
GOTERM_MF_DIRECT	GO:0042826	histone deacetylase binding	4.43548	0.0738114	Q924K8, A2A8L1, P11103, O89090, Q9Z2V5, Q64321, P13864, Q6PDQ2, Q8K4B0, Q9R190, Q9DBR0	245	33	1298	1.76599	1	1	0.997222	1.13188
GOTERM_MF_DIRECT	GO:0016887	ATPase activity	2.82258	0.0814715	Q61687, P97310, Q9Z1T6, A2A8L1, Q91XU0, Q6PDQ2, E9Q555	245	17	1298	2.18151	1	1	0.997222	1.08899
GOTERM_MF_DIRECT	GO:0005545	1-phosphatidylinositol binding	1.6129	0.0842067	Q810J8, Q8R2V5, Q8BL66, E9Q4P1	245	6	1298	3.53197	1	1	0.997222	1.07465
GOTERM_MF_DIRECT	GO:0003735	structural constituent of ribosome	1.6129	0.0842067	Q6ZWY3, P62983, Q6ZWU9, P61514	245	6	1298	3.53197	1	1	0.997222	1.07465
GOTERM_MF_DIRECT	GO:0048487	beta-tubulin binding	1.20968	0.0925052	Q9Z103, Q9Z2V5, Q9WVM1	245	3	1298	5.29796	1	1	0.997222	1.03383
