# Supplementary material for: Mining proteomes for zinc finger persulfidation
Source: Royal Society of Chemistry journal article supplement (doi:10.1039/d3cb00106g), 2024-01-01
Supplement: d3cb00106g14.xlsx [file d3cb00106g14.xlsx]

## Sheet: Overlapping_SSH_1
Column1	Human_Mice_Intersect	Human_Plant_Intersect	Mice_Plant_Intersect
1	ZCCHV	MCM2	MCM2
2	RS27	NA	DUS3L
3	ADNP	NA	ANM3
4	IF2B	NA	HAKAI
5	ARI2	NA	NA
6	DNJA3	NA	NA
7	KDM3B	NA	NA
8	RPB2	NA	NA
9	RBX2	NA	NA
10	ZN326	NA	NA
11	NFX1	NA	NA
12	PEG3	NA	NA
13	RBP2	NA	NA
14	PARP1	NA	NA
15	WRIP1	NA	NA
16	ZN428	NA	NA
17	RS27L	NA	NA
18	SRSF7	NA	NA
19	FHL1	NA	NA
20	CHD5	NA	NA
21	CNBP	NA	NA
22	DNJA1	NA	NA
23	MCM2	NA	NA
24	HDAC6	NA	NA
25	DNMT1	NA	NA
26	TRI25	NA	NA
27	UBR4	NA	NA
28	DNJA2	NA	NA
29	MATR3	NA	NA
30	RL37A	NA	NA
31	SF01	NA	NA
32	SF3A2	NA	NA
33	RU1C	NA	NA
34	TIF1B	NA	NA
35	U2AF2	NA	NA
36	ARI1	NA	NA
37	FHL2	NA	NA
38	PHC2	NA	NA
39	RGAP1	NA	NA
40	ZC3HF	NA	NA
41	CBL	NA	NA
42	CHD4	NA	NA
43	EWS	NA	NA
44	I2BP2	NA	NA
45	RN114	NA	NA
46	SMYD5	NA	NA
47	SQSTM	NA	NA
48	ZFP91	NA	NA
49	ARHG2	NA	NA
50	LYAR	NA	NA
51	ZFPL1	NA	NA

## Sheet: Overlapping_SSH_2
Column1	Human_Mice_Intersect	Human_Plant_Intersect	Mice_Plant_Intersect	Human_Rat_Intersect	Mice_Rat_Intersect	Plant_Rat_Intersect			Human_Mice_Rat_intersect	Human_Mice_Plant_Intersect	Human_Mice_Rat_intersect	Mice_Plant_Rat_Intersect
1	ZCCHV	MCM2	MCM2	ADNP	ZRAB2	ANM3			CNBP	MCM2	ADNP	ANM3
2	RS27		DUS3L	PARP1	CNBP				TIF1B		PARP1
3	ADNP		ANM3	WRIP1	TIF1B				UBR4		WRIP1
4	IF2B		HAKAI	CHD5	UBR4				WRIP1		CHD5
5	ARI2			CNBP	WRIP1				DNMT1		CNBP
6	DNJA3			DNMT1	DNMT1				ADNP		DNMT1
7	KDM3B			UBR4	UBC9				PARP1		UBR4
8	RPB2			TIF1B	GIT1				CHD5		TIF1B
9	RBX2			ZFR	SYTL4
10	ZN326				CLIP1
11	NFX1				NPL4
12	PEG3				CTCF
13	RBP2				ADNP
14	PARP1				PARP1
15	WRIP1				CHD5
16	ZN428				ANM3
17	RS27L				U2AF4
18	SRSF7
19	FHL1
20	CHD5
21	CNBP
22	DNJA1
23	MCM2
24	HDAC6
25	DNMT1
26	TRI25
27	UBR4
28	DNJA2
29	MATR3
30	RL37A
31	SF01
32	SF3A2
33	RU1C
34	TIF1B
35	U2AF2
36	ARI1
37	FHL2
38	PHC2
39	RGAP1
40	ZC3HF
41	CBL
42	CHD4
43	EWS
44	I2BP2
45	RN114
46	SMYD5
47	SQSTM
48	ZFP91
49	ARHG2
50	LYAR
51	ZFPL1

## Sheet: BTA_overlapping
Column1	HatzHine_Intersect	HatzMorton_Intersect	MortonHine_Intersect
1	U2AF2_MOUSE	NFX1_MOUSE	ZFAN6_MOUSE
2	UBP5_MOUSE	RBX2_MOUSE	TRIM2_MOUSE
3	RBP2_MOUSE	UBP5_MOUSE	RBP2_MOUSE
4	NA	RBX1_MOUSE	FUS_MOUSE
5	NA	SQSTM_MOUSE	HGS_MOUSE
6	NA	CHD4_MOUSE	UBP5_MOUSE
7	NA	RBP2_MOUSE	EWS_MOUSE
8	NA	DUS3L_MOUSE	EEA1_MOUSE
9	NA	PDCD2_MOUSE	NA
